# Supplementary material
Source: PubMed Central journal article supplement (PMC5783655)
Supplement: EHP1632.s001.acco.pdf [file EHP1632.s001.acco.pdf]

**Note to readers with disabilities:** *EHP* strives to ensure that all journal content is accessible to all readers. However, some figures and Supplemental Material published in *EHP* articles may not conform to [508 standards](#) due to the complexity of the information being presented. If you need assistance accessing journal content, please contact [ehp508@niehs.nih.gov](mailto:ehp508@niehs.nih.gov). Our staff will work with you to assess and meet your accessibility needs within 3 working days.

### **Supplemental Material**

#### **Developmental PBDE Exposure and IQ/ADHD in Childhood: A Systematic Review and Meta-analysis**

Juleen Lam, Bruce P. Lanphear, David Bellinger, Daniel A. Axelrad, Jennifer McPartland, Patrice Sutton, Lisette Davidson, Natalyn Daniels, Saunak Sen, and Tracey J. Woodruff

#### **Table of Contents**

**Figure S1.** Meta-analysis sensitivity analysis to effects from replacing Chen et al. (2014) estimate with Zhang et al. (2016) estimate evaluating same cohort of children at later time point (7 years instead of 5 years)

**Figure S2.** Meta-analysis sensitivity analysis to effects from an additional new study

**Table S1.** Database-specific search terms

**Table S2.** Toxicological websites and grey literature databases searched

**Table S3.** Data Extraction Fields and Description

**Table S4.** Characteristics and risk of bias ratings of Adgent et al. (2014)

**Table S5.** Characteristics and risk of bias ratings of Chao et al. (2011)

**Table S6.** Characteristics and risk of bias ratings of Chen et al. (2014)

**Table S7.** Characteristics and risk of bias ratings of Cowell et al. (2015)

**Table S8.** Characteristics and risk of bias ratings of Gascon et al. (2011)

**Table S9.** Characteristics and risk of bias ratings of Gascon et al. (2012)

**Table S10.** Characteristics and risk of bias ratings of Gump et al. (2014)

**Table S11.** Characteristics and risk of bias ratings of Eskenazi et al. (2013)

**Table S12.** Characteristics and risk of bias ratings of Herbstman et al. (2010)

**Table S13.** Characteristics and risk of bias ratings of Hoffman et al. (2012)

**Table S14.** Characteristics and risk of bias ratings of Lin et al. (2010)

**Table S15.** Characteristics and risk of bias ratings of Roze et al. (2009)

**Table S16.** Characteristics and risk of bias ratings of Sagiv et al. (2015)

**Table S17.** Characteristics and risk of bias ratings of Shy et al. (2011)

**Table S18.** Characteristics and risk of bias ratings of Zhang et al. (2016)

**List of excluded studies (n=1788)**

**Instructions for making risk of bias determinations**

**References**

**Figure S1: Meta-analysis sensitivity analysis to effects from replacing Chen et al. (2014) estimate with Zhang et al. (2016) estimate evaluating same cohort of children at later time point (7 years instead of 5 years)**

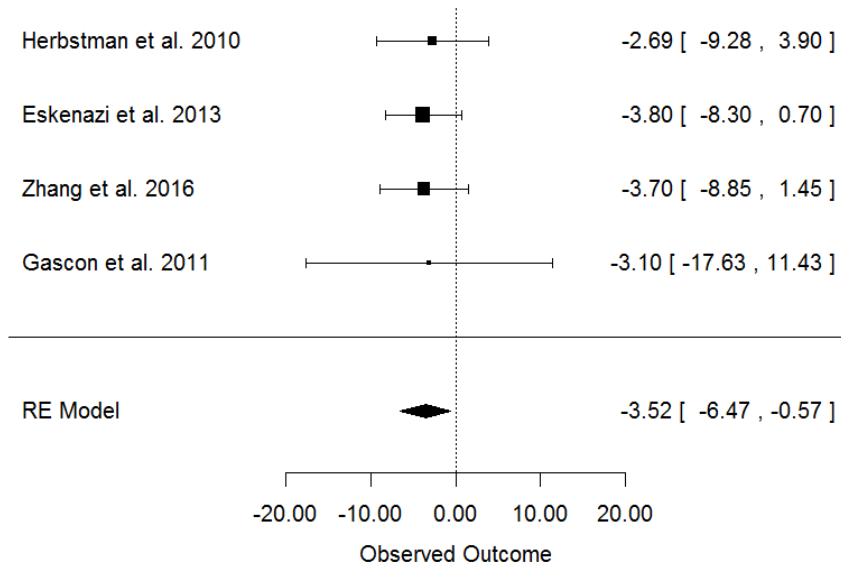

**Figure S2: Meta-analysis sensitivity analysis to effects from an additional new study**

**(A) Association estimate from a hypothetical new study to change the meta-analysis association to non-significant (95% confidence interval overlapping zero)**

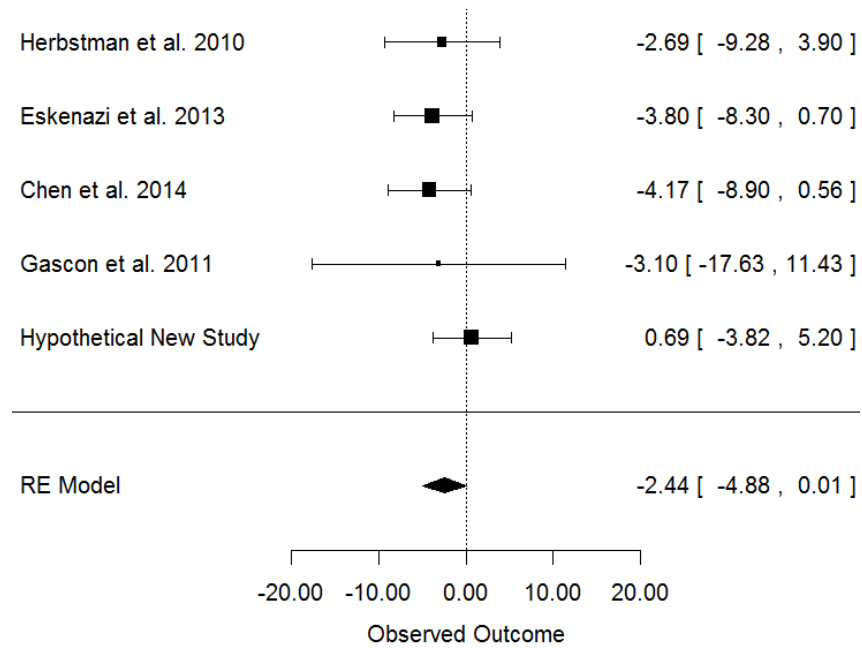

**(B) Association estimate from a hypothetical new study to change the meta-analysis association estimate > 0 (opposite direction)**

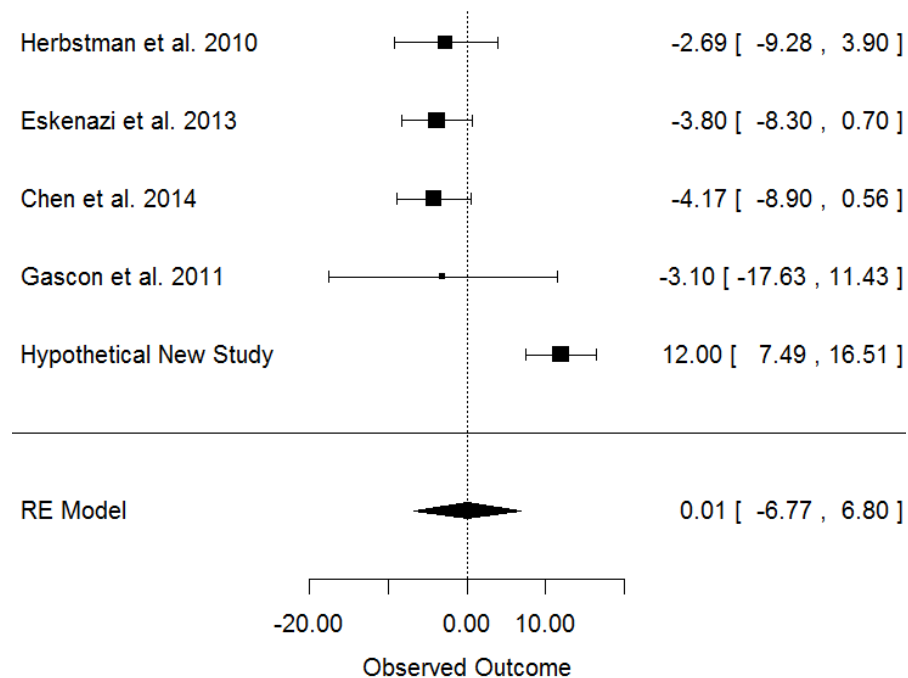

**Table S1: Database-specific search terms**

*PubMed search strategy:*

| Search                                                   | PubMed                                                                                                                                                                                                                                                                                                                                                                                                                                                                                                                                                                                                                                                                                                                                                                                                                                                                                                                                                                                                                                                                                                                                                                                                                                                                                                         |
|----------------------------------------------------------|----------------------------------------------------------------------------------------------------------------------------------------------------------------------------------------------------------------------------------------------------------------------------------------------------------------------------------------------------------------------------------------------------------------------------------------------------------------------------------------------------------------------------------------------------------------------------------------------------------------------------------------------------------------------------------------------------------------------------------------------------------------------------------------------------------------------------------------------------------------------------------------------------------------------------------------------------------------------------------------------------------------------------------------------------------------------------------------------------------------------------------------------------------------------------------------------------------------------------------------------------------------------------------------------------------------|
| <p>#1<br/>Substance terms:<br/>Controlled vocabulary</p> | <p>"Flame Retardants"[Mesh] OR "Flame Retardants" [Pharmacological Action] OR "Halogenated Diphenyl Ethers"[Mesh] OR ("Phenyl Ethers"[Mesh:NoExp] AND ("1974/01/01"[PDAT] : "2008/12/31"[PDAT])) OR "pentabromodiphenyl ether" [Supplementary Concept] OR "2,2',3,3',4,4',6,6'-octabromodiphenyl ether" [Supplementary Concept] OR "decabromobiphenyl ether" [Supplementary Concept] OR "tribromodiphenyl ether 28"[Supplementary Concept] OR "2,2',4,4'-tetrabromodiphenyl ether" [Supplementary Concept] OR "2,2',4,5'-tetrabromodiphenyl ether" [Supplementary Concept] OR "hexabromodiphenyl ether 154" [Supplementary Concept] OR "2,2',4,4',5,6'-hexabromodiphenyl ether" [Supplementary Concept] OR "2,2',3,4,4',5',6-heptabromodiphenyl ether" [Supplementary Concept] OR "2,2',3,3',4,5,5',6,6'-nonabromodiphenyl ether" [Supplementary Concept] OR "2,2',3,3',4,4',5,6,6'-nonabromodiphenyl ether" [Supplementary Concept] OR "2,2',3,3',4,4',5,5',6-nonabromodiphenyl ether" [Supplementary Concept] OR "2,2',4,4',5,5'-hexabrominated diphenyl ether" [Supplementary Concept] OR "hexabrominated diphenyl ether 153" [Supplementary Concept] OR "pentabrominated diphenyl ether 100" [Supplementary Concept] OR "5-OH-BDE-47" [Supplementary Concept] OR "6-OH-BDE-47" [Supplementary Concept]</p> |
| <p>#2<br/>Substance terms: text<br/>word</p>             | <p>flame retard*[tw] OR fire retard*[tw] OR fireproofing agent*[tw] OR "FireMaster"[tw] OR "Bromkal"[tw] OR diphenyl ether deriv*[tw] OR halogenated diphenyl*[tw] OR brominated diphenyl*[tw] OR PBDE*[tw] OR polybrominated diphenyl*[tw] OR polybromodiphenyl*[tw] OR PBDP*[tw] OR BDE*[tw] OR pentabromodiphenyl*[tw] OR c-pentaBDE*[tw] OR PentaBDE*[tw] OR "PeBDE"[tw] OR "DE 71"[tw] OR "DE71"[tw] OR "pentabrominated diphenyl"[tw] OR "pentabrominated diphenyls"[tw] OR "PBDPO"[tw] OR "Planelon PB 501"[tw] OR pentabromo deriv*[tw] OR pentabromophenyl*[tw] OR octabromodiphenyl*[tw] OR c-octaBDE*[tw] OR OctaBDE*[tw] OR "OcBDE"[tw] OR "Octabrom"[tw] OR octabromo deriv*[tw] OR "OBDE"[tw] OR "OBDPO"[tw] OR "octabrominated diphenyl"[tw] OR "octabrominated diphenyls"[tw] OR decabromodiphenyl*[tw] OR c-decaBDE*[tw] OR DecaBDE*[tw] OR "DeBDE"[tw] OR "DBDPO"[tw] OR "decabrominated diphenyl"[tw] OR</p>                                                                                                                                                                                                                                                                                                                                                                                |

|                                                    |                                                                                                                                                                                                                                                                                                                                                                                                                                                                                                                                                                                                                                                                                                                                                                                                                                                                                                                                                                                                                                                                                                                                                                                                                                                                                                                                                                                                                                                                                                                                      |
|----------------------------------------------------|--------------------------------------------------------------------------------------------------------------------------------------------------------------------------------------------------------------------------------------------------------------------------------------------------------------------------------------------------------------------------------------------------------------------------------------------------------------------------------------------------------------------------------------------------------------------------------------------------------------------------------------------------------------------------------------------------------------------------------------------------------------------------------------------------------------------------------------------------------------------------------------------------------------------------------------------------------------------------------------------------------------------------------------------------------------------------------------------------------------------------------------------------------------------------------------------------------------------------------------------------------------------------------------------------------------------------------------------------------------------------------------------------------------------------------------------------------------------------------------------------------------------------------------|
|                                                    | <p>"decabrominated diphenyls"[tw] OR decabromo deriv*[tw] OR "Decabrom"[tw] OR "Berkflam B 10E"[tw] OR "FR 300BA"[tw] OR "FR 300 BA"[tw] OR tribromodiphenyl*[tw] OR "tribrominated diphenyl"[tw] OR "tribrominated diphenyls"[tw] OR "TrBDE"[tw] OR tribromo deriv*[tw] OR tetrabromodiphenyl*[tw] OR TetraBDE*[tw] OR "TeBDE"[tw] OR "TBDE"[tw] OR "BPDE"[tw] OR tetrabromo deriv*[tw] OR "TBDP"[tw] OR "tetrabrominated diphenyl"[tw] OR "tetrabrominated diphenyls"[tw] OR hexabromodiphenyl*[tw] OR HexaBDE*[tw] OR "HxBDE"[tw] OR "hexabrominated diphenyl"[tw] OR "hexabrominated diphenyls"[tw] OR hexabromo deriv*[tw] OR heptabromodiphenyl*[tw] OR HeptaBDE*[tw] OR "HeBDE"[tw] OR "heptabrominated diphenyl"[tw] OR "heptabrominated diphenyls"[tw] OR heptabromo deriv*[tw] OR nonabromodiphenyl*[tw] OR NonaBDE*[tw] OR "NoBDE"[tw] OR "nonabrominated diphenyl"[tw] OR "nonabrominated diphenyls"[tw] OR nonabromo deriv*[tw]</p>                                                                                                                                                                                                                                                                                                                                                                                                                                                                                                                                                                                     |
| <p>#3<br/>Substance CAS<br/>Numbers: text word</p> | <p>"7025-06-1"[tw] OR "6876-00-2"[tw] OR "101-55-3"[tw] OR "51452-87-0"[tw] OR "446254-14-4"[tw] OR "147217-72-9"[tw] OR "171977-44-9"[tw] OR "147217-71-8"[tw] OR "33513-66-3"[tw] OR "51930-04-2"[tw] OR "6903-63-5"[tw] OR "189084-59-1"[tw] OR "83694-71-7"[tw] OR "46438-88-4"[tw] OR "2050-47-7"[tw] OR "147217-74-1"[tw] OR "147217-75-2"[tw] OR "407606-55-7"[tw] OR "147217-73-0"[tw] OR "147217-76-3"[tw] OR "337513-67-4"[tw] OR "446254-15-5"[tw] OR "446254-16-6"[tw] OR "147217-77-4"[tw] OR "337513-75-4"[tw] OR "337513-53-8"[tw] OR "41318-75-6"[tw] OR "337513-56-1"[tw] OR "155999-95-4"[tw] OR "65075-08-3"[tw] OR "189084-60-4"[tw] OR "147217-78-5"[tw] OR "446254-17-7"[tw] OR "147217-80-9"[tw] OR "147217-79-6"[tw] OR "147217-81-0"[tw] OR "337513-54-9"[tw] OR "337513-68-5"[tw] OR "446254-18-8"[tw] OR "446254-19-9"[tw] OR "446254-20-2"[tw] OR "446254-22-4"[tw] OR "5436-43-1"[tw] OR "337513-55-0"[tw] OR "243982-82-3"[tw] OR "446254-23-5"[tw] OR "189084-57-9"[tw] OR "446254-24-6"[tw] OR "446254-25-7"[tw] OR "446254-31-5"[tw] OR "446254-32-6"[tw] OR "446254-33-7"[tw] OR "446254-34-8"[tw] OR "189084-61-5"[tw] OR "446254-37-1"[tw] OR "446254-38-2"[tw] OR "327185-09-1"[tw] OR "446254-39-3"[tw] OR "189084-62-6"[tw] OR "446254-40-6"[tw] OR "446254-41-7"[tw] OR "446254-42-8"[tw] OR "189084-63-7"[tw] OR "446254-43-9"[tw] OR "93703-48-1"[tw] OR "446254-45-1"[tw] OR "446254-48-4"[tw] OR "103173-66-6"[tw] OR "446254-50-8"[tw] OR "446254-51-9"[tw] OR "182346-21-0"[tw] OR</p> |

|                                                              |                                                                                                                                                                                                                                                                                                                                                                                                                                                                                                                                                                                                                                                                                                                                                                                                                                                                                                                                                                                                                                                                                                                                                                                                                                                                                                                                                                                                                          |
|--------------------------------------------------------------|--------------------------------------------------------------------------------------------------------------------------------------------------------------------------------------------------------------------------------------------------------------------------------------------------------------------------------------------------------------------------------------------------------------------------------------------------------------------------------------------------------------------------------------------------------------------------------------------------------------------------------------------------------------------------------------------------------------------------------------------------------------------------------------------------------------------------------------------------------------------------------------------------------------------------------------------------------------------------------------------------------------------------------------------------------------------------------------------------------------------------------------------------------------------------------------------------------------------------------------------------------------------------------------------------------------------------------------------------------------------------------------------------------------------------|
|                                                              | <p>"446254-53-1"[tw] OR "446254-54-2"[tw] OR "446254-55-3"[tw] OR "446254-55-3"[tw] OR "446254-57-5"[tw] OR "446254-59-7"[tw] OR "446254-61-1"[tw] OR "446254-64-4"[tw] OR "38463-82-0"[tw] OR "60348-60-9"[tw] OR "189084-64-8"[tw] OR "446254-65-5"[tw] OR "446254-66-6"[tw] OR "446254-67-7"[tw] OR "446254-68-8"[tw] OR "373594-78-6"[tw] OR "446254-69-9"[tw] OR "446254-71-3"[tw] OR "446254-72-4"[tw] OR "446254-74-6"[tw] OR "446254-77-9"[tw] OR "446254-78-0"[tw] OR "189084-65-9"[tw] OR "446254-80-4"[tw] OR "189084-66-0"[tw] OR "182677-30-1"[tw] OR "243982-83-4"[tw] OR "68631-49-2"[tw] OR "207122-15-4"[tw] OR "35854-94-5"[tw] OR "189084-58-0"[tw] OR "189084-67-1"[tw] OR "207122-16-5"[tw] OR "189084-68-2"[tw] OR "1163-19-5"[tw] OR "109945-70-2"[tw] OR "113152-37-7"[tw] OR "113172-79-5"[tw] OR "139598-16-6"[tw] OR "139749-52-3"[tw] OR "145538-74-5"[tw] OR "32534-81-9"[tw] OR "32536-52-0"[tw] OR "40088-47-9"[tw] OR "446254-27-9"[tw] OR "446255-20-5"[tw] OR "446255-22-7"[tw] OR "49690-94-0"[tw] OR "63936-56-1"[tw] OR "64589-00-0"[tw] OR "68928-80-3"[tw] OR "85446-17-9"[tw] OR "36483-60-0"[tw] OR "437701-79-6"[tw] OR "446255-26-1"[tw] OR "117948-63-7"[tw] OR "446255-30-7"[tw] OR "61262-53-1"[tw] OR "405237-85-6"[tw] OR "39275-89-3"[tw] OR "13654-09-6"[tw] OR "61288-13-9"[tw] OR "446255-39-6"[tw] OR "337513-72-1"[tw] OR "366791-32-4"[tw] OR "2050-47-7"[tw]</p> |
| <p>#4<br/>Substance CAS<br/>Numbers: Registry<br/>Number</p> | <p>"7025-06-1"[rn] OR "6876-00-2"[rn] OR "101-55-3"[rn] OR "51452-87-0"[rn] OR "446254-14-4"[rn] OR "147217-72-9"[rn] OR "171977-44-9"[rn] OR "147217-71-8"[rn] OR "33513-66-3"[rn] OR "51930-04-2"[rn] OR "6903-63-5"[rn] OR "189084-59-1"[rn] OR "83694-71-7"[rn] OR "46438-88-4"[rn] OR "2050-47-7"[rn] OR "147217-74-1"[rn] OR "147217-75-2"[rn] OR "407606-55-7"[rn] OR "147217-73-0"[rn] OR "147217-76-3"[rn] OR "337513-67-4"[rn] OR "446254-15-5"[rn] OR "446254-16-6"[rn] OR "147217-77-4"[rn] OR "337513-75-4"[rn] OR "337513-53-8"[rn] OR "41318-75-6"[rn] OR "337513-56-1"[rn] OR "155999-95-4"[rn] OR "65075-08-3"[rn] OR "189084-60-4"[rn] OR "147217-78-5"[rn] OR "446254-17-7"[rn] OR "147217-80-9"[rn] OR "147217-79-6"[rn] OR "147217-81-0"[rn] OR "337513-54-9"[rn] OR "337513-68-5"[rn] OR "446254-18-8"[rn] OR "446254-19-9"[rn] OR "446254-20-2"[rn] OR "446254-22-4"[rn] OR "5436-43-1"[rn] OR "337513-55-0"[rn] OR "243982-82-3"[rn] OR "446254-23-5"[rn] OR "189084-57-9"[rn] OR "446254-24-6"[rn] OR "446254-25-7"[rn] OR</p>                                                                                                                                                                                                                                                                                                                                                                  |

|                                               |                                                                                                                                                                                                                                                                                                                                                                                                                                                                                                                                                                                                                                                                                                                                                                                                                                                                                                                                                                                                                                                                                                                                                                                                                                                                                                                                                                                                                                                                                                                                                                                                                                                                                                                                                                                                                                                                                                       |
|-----------------------------------------------|-------------------------------------------------------------------------------------------------------------------------------------------------------------------------------------------------------------------------------------------------------------------------------------------------------------------------------------------------------------------------------------------------------------------------------------------------------------------------------------------------------------------------------------------------------------------------------------------------------------------------------------------------------------------------------------------------------------------------------------------------------------------------------------------------------------------------------------------------------------------------------------------------------------------------------------------------------------------------------------------------------------------------------------------------------------------------------------------------------------------------------------------------------------------------------------------------------------------------------------------------------------------------------------------------------------------------------------------------------------------------------------------------------------------------------------------------------------------------------------------------------------------------------------------------------------------------------------------------------------------------------------------------------------------------------------------------------------------------------------------------------------------------------------------------------------------------------------------------------------------------------------------------------|
|                                               | <p>"446254-31-5"[rn] OR "446254-32-6"[rn] OR "446254-33-7"[rn] OR "446254-34-8"[rn] OR "189084-61-5"[rn] OR "446254-37-1"[rn] OR "446254-38-2"[rn] OR "327185-09-1"[rn] OR "446254-39-3"[rn] OR "189084-62-6"[rn] OR "446254-40-6"[rn] OR "446254-41-7"[rn] OR "446254-42-8"[rn] OR "189084-63-7"[rn] OR "446254-43-9"[rn] OR "93703-48-1"[rn] OR "446254-45-1"[rn] OR "446254-48-4"[rn] OR "103173-66-6"[rn] OR "446254-50-8"[rn] OR "446254-51-9"[rn] OR "182346-21-0"[rn] OR "446254-53-1"[rn] OR "446254-54-2"[rn] OR "446254-55-3"[rn] OR "446254-55-3"[rn] OR "446254-57-5"[rn] OR "446254-59-7"[rn] OR "446254-61-1"[rn] OR "446254-64-4"[rn] OR "38463-82-0"[rn] OR "60348-60-9"[rn] OR "189084-64-8"[rn] OR "446254-65-5"[rn] OR "446254-66-6"[rn] OR "446254-67-7"[rn] OR "446254-68-8"[rn] OR "373594-78-6"[rn] OR "446254-69-9"[rn] OR "446254-71-3"[rn] OR "446254-72-4"[rn] OR "446254-74-6"[rn] OR "446254-77-9"[rn] OR "446254-78-0"[rn] OR "189084-65-9"[rn] OR "446254-80-4"[rn] OR "189084-66-0"[rn] OR "182677-30-1"[rn] OR "243982-83-4"[rn] OR "68631-49-2"[rn] OR "207122-15-4"[rn] OR "35854-94-5"[rn] OR "189084-58-0"[rn] OR "189084-67-1"[rn] OR "207122-16-5"[rn] OR "189084-68-2"[rn] OR "1163-19-5"[rn] OR "109945-70-2"[rn] OR "113152-37-7"[rn] OR "113172-79-5"[rn] OR "139598-16-6"[rn] OR "139749-52-3"[rn] OR "145538-74-5"[rn] OR "32534-81-9"[rn] OR "32536-52-0"[rn] OR "40088-47-9"[rn] OR "446254-27-9"[rn] OR "446255-20-5"[rn] OR "446255-22-7"[rn] OR "49690-94-0"[rn] OR "63936-56-1"[rn] OR "64589-00-0"[rn] OR "68928-80-3"[rn] OR "85446-17-9"[rn] OR "36483-60-0"[rn] OR "437701-79-6"[rn] OR "446255-26-1"[rn] OR "117948-63-7"[rn] OR "446255-30-7"[rn] OR "61262-53-1"[rn] OR "405237-85-6"[rn] OR "39275-89-3"[rn] OR "13654-09-6"[rn] OR "61288-13-9"[rn] OR "446255-39-6"[rn] OR "337513-72-1"[rn] OR "366791-32-4"[rn] OR "2050-47-7"[rn]</p> |
| #5                                            | #1 OR #2 OR #3 OR #4                                                                                                                                                                                                                                                                                                                                                                                                                                                                                                                                                                                                                                                                                                                                                                                                                                                                                                                                                                                                                                                                                                                                                                                                                                                                                                                                                                                                                                                                                                                                                                                                                                                                                                                                                                                                                                                                                  |
| #6<br>Outcome terms:<br>Controlled vocabulary | <p>"Psychological Tests"[Mesh] OR "Mental Disorders Diagnosed in Childhood"[Mesh] OR "Mental Processes"[Mesh] OR "Attention"[Mesh] OR "Human Development" [Mesh] OR "Intelligence"[Mesh] OR "Neurobehavioral Manifestations"[Mesh] OR "Psychomotor Performance"[Mesh] OR "Behavior"[Mesh:NoExp] OR "Adolescent Behavior"[Mesh] OR "Behavioral Symptoms"[Mesh] OR "Child Behavior"[Mesh] OR "Communication"[Mesh] OR "Impulsive Behavior"[Mesh] OR "Motor Activity"[Mesh] OR "Social Behavior"[Mesh] OR</p>                                                                                                                                                                                                                                                                                                                                                                                                                                                                                                                                                                                                                                                                                                                                                                                                                                                                                                                                                                                                                                                                                                                                                                                                                                                                                                                                                                                            |



|                                |                                                                                                                                                                                                                                                                                                                                                                                                                                                                                                                                                                                                                                                                                                                                                                                                                                                                                                                                                                                                                                                                                                                                                                                                                                                                                                                                                                                                                                                                                                                                                                                                                                                                                                                                                                                                                                                                                                                                                                                                                                                                                                                                                            |
|--------------------------------|------------------------------------------------------------------------------------------------------------------------------------------------------------------------------------------------------------------------------------------------------------------------------------------------------------------------------------------------------------------------------------------------------------------------------------------------------------------------------------------------------------------------------------------------------------------------------------------------------------------------------------------------------------------------------------------------------------------------------------------------------------------------------------------------------------------------------------------------------------------------------------------------------------------------------------------------------------------------------------------------------------------------------------------------------------------------------------------------------------------------------------------------------------------------------------------------------------------------------------------------------------------------------------------------------------------------------------------------------------------------------------------------------------------------------------------------------------------------------------------------------------------------------------------------------------------------------------------------------------------------------------------------------------------------------------------------------------------------------------------------------------------------------------------------------------------------------------------------------------------------------------------------------------------------------------------------------------------------------------------------------------------------------------------------------------------------------------------------------------------------------------------------------------|
|                                | "Spatial Behavior"[Mesh] OR "Hyperkinesis"[Mesh] OR "Brain/drug effects"[Mesh]                                                                                                                                                                                                                                                                                                                                                                                                                                                                                                                                                                                                                                                                                                                                                                                                                                                                                                                                                                                                                                                                                                                                                                                                                                                                                                                                                                                                                                                                                                                                                                                                                                                                                                                                                                                                                                                                                                                                                                                                                                                                             |
| #7<br>Outcome terms: Text word | neurodevelopment*[tw] OR neurotoxic*[tw] OR neurobehav*[tw] OR neuropsychologic*[tw] OR neurocogniti*[tw] OR psychologic*[tw] OR aptitude*[tw] OR mental*[tw] OR intelligence*[tw] OR "IQ"[tw] OR intellectual*[tw] OR language*[tw] OR comprehension*[tw] OR impulsiv*[tw] OR "ADHD"[tw] OR "ADDH"[tw] OR "ADHS"[tw] OR "AD/HD"[tw] OR "hkd"[tw] OR hyperactiv*[tw] OR hyper activ*[tw] OR hyperkin*[tw] OR hyper kin*[tw] OR attention defic*[tw] OR attention related*[tw] OR inattention*[tw] OR inattentiv*[tw] OR "sustained attention"[tw] OR "attention span"[tw] OR attention dysfunc*[tw] OR attention disorder*[tw] OR "distractibility"[tw] OR Behavioral*[tw] OR behavioural*[tw] OR behavior defic*[tw] OR behaviour defic*[tw] OR behavior dysfunc*[tw] OR behavior disorder*[tw] OR behaviour disorder*[tw] OR behavior effect*[tw] OR behaviour effect*[tw] OR behavior checklist*[tw] OR behaviour checklist*[tw] OR disruptive behav*[tw] OR disruption behav*[tw] OR disruptive disorder*[tw] OR disruption disorder*[tw] OR defiance behav*[tw] OR defiant behav*[tw] OR defiance disorder*[tw] OR defiant disorder*[tw] OR spontaneous behav*[tw] OR externalizing behav*[tw] OR "cognitive"[tw] OR "cognition"[tw] OR "psychomotor"[tw] OR "learning"[tw] OR "memory"[tw] OR executive function*[tw] OR executive control*[tw] OR executive dysfunction*[tw] OR executive impairment*[tw] OR motor abilit*[tw] OR motor activit* [tw] OR "motor performance"[tw] OR motor function*[tw] OR motor skill*[tw] OR "fine motor"[tw] OR "vigilance"[tw] OR "reaction time"[tw] OR "processing speed"[tw] OR "response inhibition"[tw] OR "Stanford Binet"[tw] OR Binet Test*[tw] OR "Bender Gestalt Test" OR Aphasia Test*[tw] OR Bayley*[tw] OR "Wechsler"[tw] OR "WISC"[tw] OR McCarthy Scale*[tw] OR "Continuous Performance Test"[tw] OR "Continuous Performance Tests"[tw] OR "Continuous Performance Task"[tw] OR "Continuous Performance Tasks"[tw] OR Conners*[tw] OR "CRS-T"[tw] OR "CRS-P"[tw] OR "academic achievement"[tw] OR "scholastic achievement"[tw] OR brain disorder*[tw] OR brain damage*[tw] OR brain dysfunc*[tw] |
| #8                             | #6 OR #7                                                                                                                                                                                                                                                                                                                                                                                                                                                                                                                                                                                                                                                                                                                                                                                                                                                                                                                                                                                                                                                                                                                                                                                                                                                                                                                                                                                                                                                                                                                                                                                                                                                                                                                                                                                                                                                                                                                                                                                                                                                                                                                                                   |
| #9                             | #5 AND #8                                                                                                                                                                                                                                                                                                                                                                                                                                                                                                                                                                                                                                                                                                                                                                                                                                                                                                                                                                                                                                                                                                                                                                                                                                                                                                                                                                                                                                                                                                                                                                                                                                                                                                                                                                                                                                                                                                                                                                                                                                                                                                                                                  |

*Web of Science and Biosis Previews:*

| <b>Search</b>                                     | <b>Web of Science &amp; Biosis Previews</b>                                                                                                                                                                                                                                                                                                                                                                                                                                                                                                                                                                                                                                                                                                                                                                                                                                                                                                                                                                                                                                                                                                                                                                                                                                                                                                  |
|---------------------------------------------------|----------------------------------------------------------------------------------------------------------------------------------------------------------------------------------------------------------------------------------------------------------------------------------------------------------------------------------------------------------------------------------------------------------------------------------------------------------------------------------------------------------------------------------------------------------------------------------------------------------------------------------------------------------------------------------------------------------------------------------------------------------------------------------------------------------------------------------------------------------------------------------------------------------------------------------------------------------------------------------------------------------------------------------------------------------------------------------------------------------------------------------------------------------------------------------------------------------------------------------------------------------------------------------------------------------------------------------------------|
| <p>#1<br/>Substance terms: topic search</p>       | <p>TS=("flame retard*" OR "fire retard*" OR "fireproofing agent*" OR "FireMaster" OR "Bromkal" OR "diphenyl ether deriv*" OR "Halogenated Diphenyl*" OR "Brominated Diphenyl*" OR PBDE* OR "Polybrominated Diphenyl*" OR polybromodiphenyl* OR PBDP* OR BDE* OR pentabromodiphenyl* OR "c-pentaBDE*" OR PentaBDE* OR "PeBDE" OR "DE 71" OR "DE71" OR "pentabrominated diphenyl*" OR "PBDPO" OR "Planelon PB 501" OR "pentabromo deriv*" OR Pentabromophenyl* OR octabromodiphenyl* OR "c-octaBDE*" OR OctaBDE* OR "OcBDE" OR "Octabrom" OR "octabromo deriv*" OR "OBDE" OR "OBDPO" OR "octabrominated diphenyl*" OR decabromodiphenyl* OR "c-decaBDE*" OR DecaBDE* OR "DeBDE" OR "DBDPO" OR "decabrominated diphenyl*" OR "decabromo deriv*" OR "Decabrom" OR "Berkflam B 10E" OR "FR 300BA" OR "FR 300 BA" OR tribromodiphenyl* OR "tribrominated diphenyl*" OR "TrBDE" OR "tribromo deriv*" OR tetrabromodiphenyl* OR TetraBDE* OR "TeBDE" OR "TBDE" OR "BPDE" OR "tetrabromo deriv*" OR "TBDP" OR "tetrabrominated diphenyl*" OR hexabromodiphenyl* OR HexaBDE* OR "HxBDE" OR "hexabrominated diphenyl*" OR "hexabromo deriv*" OR heptabromodiphenyl* OR HeptaBDE* OR "HeBDE" OR "heptabrominated diphenyl*" OR "heptabromo deriv*" OR nonabromodiphenyl* OR NonaBDE* OR "NoBDE" OR "nonabrominated diphenyl*" OR "nonabromo deriv*")</p> |
| <p>#2<br/>Substance CAS numbers: topic search</p> | <p>TS=("7025-06-1" OR "6876-00-2" OR "101-55-3" OR "51452-87-0" OR "446254-14-4" OR "147217-72-9" OR "171977-44-9" OR "147217-71-8" OR "33513-66-3" OR "51930-04-2" OR "6903-63-5" OR "189084-59-1" OR "83694-71-7" OR "46438-88-4" OR "2050-47-7" OR "147217-74-1" OR "147217-75-2" OR "407606-55-7" OR "147217-73-0" OR "147217-76-3" OR "337513-67-4" OR "446254-15-5" OR "446254-16-6" OR "147217-77-4" OR "337513-75-4" OR "337513-53-8" OR "41318-75-6" OR "337513-56-1" OR "155999-95-4" OR "65075-08-3" OR "189084-60-4" OR "147217-78-5" OR "446254-17-7" OR "147217-80-9" OR "147217-79-6" OR "147217-81-0" OR "337513-54-9" OR "337513-68-5" OR "446254-18-8" OR "446254-19-9" OR "446254-20-2" OR "446254-22-4" OR "5436-43-1" OR "337513-55-0" OR "243982-82-3" OR "446254-23-5" OR "189084-57-9" OR "446254-24-6" OR "446254-25-7" OR "446254-31-5" OR "446254-32-6" OR "446254-33-7" OR "446254-34-8" OR "189084-61-5" OR "446254-37-1" OR</p>                                                                                                                                                                                                                                                                                                                                                                                |

|                                   |                                                                                                                                                                                                                                                                                                                                                                                                                                                                                                                                                                                                                                                                                                                                                                                                                                                                                                                                                                                                                                                                                                                                                                                                                                                                                                                                                                                                                                  |
|-----------------------------------|----------------------------------------------------------------------------------------------------------------------------------------------------------------------------------------------------------------------------------------------------------------------------------------------------------------------------------------------------------------------------------------------------------------------------------------------------------------------------------------------------------------------------------------------------------------------------------------------------------------------------------------------------------------------------------------------------------------------------------------------------------------------------------------------------------------------------------------------------------------------------------------------------------------------------------------------------------------------------------------------------------------------------------------------------------------------------------------------------------------------------------------------------------------------------------------------------------------------------------------------------------------------------------------------------------------------------------------------------------------------------------------------------------------------------------|
|                                   | <p>"446254-38-2" OR "327185-09-1" OR "446254-39-3" OR "189084-62-6" OR "446254-40-6" OR "446254-41-7" OR "446254-42-8" OR "189084-63-7" OR "446254-43-9" OR "93703-48-1" OR "446254-45-1" OR "446254-48-4" OR "103173-66-6" OR "446254-50-8" OR "446254-51-9" OR "182346-21-0" OR "446254-53-1" OR "446254-54-2" OR "446254-55-3" OR "446254-55-3" OR "446254-57-5" OR "446254-59-7" OR "446254-61-1" OR "446254-64-4" OR "38463-82-0" OR "60348-60-9" OR "189084-64-8" OR "446254-65-5" OR "446254-66-6" OR "446254-67-7" OR "446254-68-8" OR "373594-78-6" OR "446254-69-9" OR "446254-71-3" OR "446254-72-4" OR "446254-74-6" OR "446254-77-9" OR "446254-78-0" OR "189084-65-9" OR "446254-80-4" OR "189084-66-0" OR "182677-30-1" OR "243982-83-4" OR "68631-49-2" OR "207122-15-4" OR "35854-94-5" OR "189084-58-0" OR "189084-67-1" OR "207122-16-5" OR "189084-68-2" OR "1163-19-5" OR "109945-70-2" OR "113152-37-7" OR "113172-79-5" OR "139598-16-6" OR "139749-52-3" OR "145538-74-5" OR "32534-81-9" OR "32536-52-0" OR "40088-47-9" OR "446254-27-9" OR "446255-20-5" OR "446255-22-7" OR "49690-94-0" OR "63936-56-1" OR "64589-00-0" OR "68928-80-3" OR "85446-17-9" OR "36483-60-0" OR "437701-79-6" OR "446255-26-1" OR "117948-63-7" OR "446255-30-7" OR "61262-53-1" OR "405237-85-6" OR "39275-89-3" OR "13654-09-6" OR "61288-13-9" OR "446255-39-6" OR "337513-72-1" OR "366791-32-4" OR "2050-47-7")</p> |
| #3                                | #1 OR #2                                                                                                                                                                                                                                                                                                                                                                                                                                                                                                                                                                                                                                                                                                                                                                                                                                                                                                                                                                                                                                                                                                                                                                                                                                                                                                                                                                                                                         |
| #4<br>Outcome terms: topic search | <p>TS=(neurodevelopment* OR neurotoxic* OR neurobehav* OR neuropsychologic* OR neurocogniti* OR psychologic* OR aptitude* OR mental* OR intelligence* OR "IQ" OR intellectual* OR Language* OR comprehension* OR impulsiv* OR "ADHD" OR "ADDH" OR "ADHS" OR "AD/HD" OR "hkd" OR hyperactiv* OR (hyper NEAR/1 active*) OR hyperkin* OR (hyper NEAR/1 kin*) OR "inattention" OR inattentiv* OR "distractibility" OR behavioral* OR behavioural* OR "sustained attention" OR "attention span" OR "attention related" OR (attention* NEAR/3 defic*) OR (attention* NEAR/3 dysfunc*) OR (attention* NEAR/3 disorder*) OR (behav* NEAR/3 defic*) OR (behav* NEAR/3 dysfunc*) OR (behav* NEAR/3 disorder*) OR (disrupt* NEAR/3 disorder*) OR (disrupt* NEAR/3 behav*) OR (defian* NEAR/3 disorder*) OR (defian* NEAR/3 behav*) OR (behav* NEAR/1 effect*) OR (behav* NEAR/1 checklist*) OR (spontaneous NEAR/1 behav*) OR (externalizing NEAR/1 behav*) OR "cognitive"</p>                                                                                                                                                                                                                                                                                                                                                                                                                                                              |

|    |                                                                                                                                                                                                                                                                                                                                                                                                                                                                                                                                                                                                                                                                                                                                                                                                                                                                                                                         |
|----|-------------------------------------------------------------------------------------------------------------------------------------------------------------------------------------------------------------------------------------------------------------------------------------------------------------------------------------------------------------------------------------------------------------------------------------------------------------------------------------------------------------------------------------------------------------------------------------------------------------------------------------------------------------------------------------------------------------------------------------------------------------------------------------------------------------------------------------------------------------------------------------------------------------------------|
|    | OR "cognition" OR "psychomotor" OR "learning" OR "memory" OR (executive NEAR/1 function*) OR "executive control" OR "executive dysfunction" OR "executive impairment" OR (motor NEAR/1 abiliti*) OR "motor performance" OR (motor NEAR/1 function*) OR (motor NEAR/1 skill*) OR (motor NEAR/1 activit*) OR "fine motor" OR "vigilance" OR "reaction time" OR "processing speed" OR "response inhibition" OR "Stanford Binet" OR "Binet Test" OR "Binet tests" OR "Bender Gestalt Test" OR "Aphasia Test" OR "Aphasia Tests" OR Bayley* OR "Wechsler" OR "WISC" OR "McCarthy Scale" OR "McCarthy Scales" OR "Continuous Performance Test" OR "Continuous Performance Tests" OR "Continuous Performance Task" OR "Continuous Performance Tasks" OR Conners* OR "CRS-T" OR "CRS-P" OR "academic achievement" OR "scholastic achievement" OR (brain NEAR/3 disorder*) OR (brain NEAR/3 damage*) OR (brain NEAR/3 dysfunct*) |
| #5 | #3 AND #4                                                                                                                                                                                                                                                                                                                                                                                                                                                                                                                                                                                                                                                                                                                                                                                                                                                                                                               |

*Embase:*

| Search                                                                    | Embase                                                                                                                                                                                                                                                                                                                                                                                                                                                                                                                                                                                                                                                                                                                                                                                                                                                                                                                                                                                                                                                                                                                                                                                                                                                                                                                       |
|---------------------------------------------------------------------------|------------------------------------------------------------------------------------------------------------------------------------------------------------------------------------------------------------------------------------------------------------------------------------------------------------------------------------------------------------------------------------------------------------------------------------------------------------------------------------------------------------------------------------------------------------------------------------------------------------------------------------------------------------------------------------------------------------------------------------------------------------------------------------------------------------------------------------------------------------------------------------------------------------------------------------------------------------------------------------------------------------------------------------------------------------------------------------------------------------------------------------------------------------------------------------------------------------------------------------------------------------------------------------------------------------------------------|
| #1<br>Substance terms:<br>controlled vocabulary                           | 'flame retardant'/de OR '2,2',4,4',5,5' hexabromodiphenyl ether'/exp OR 'polybrominated diphenyl ether'/exp OR 'diphenyl ether derivative'/exp                                                                                                                                                                                                                                                                                                                                                                                                                                                                                                                                                                                                                                                                                                                                                                                                                                                                                                                                                                                                                                                                                                                                                                               |
| #2<br>Substance terms: title,<br>abstract, trade name,<br>registry number | ((flame NEXT/1 retard*) OR (fire NEXT/1 retard*) OR (fireproofing NEXT/1 agent*) OR "FireMaster" OR "Bromkal" OR ('diphenyl ether' NEXT/1 deriv*) OR (Halogenated NEXT/1 Diphenyl*) OR (Brominated NEXT/1 Diphenyl*) OR PBDE* OR (Polybrominated NEXT/1 Diphenyl*) OR polybromodiphenyl* OR PBDP* OR BDE* OR pentabromodiphenyl* OR PentaBDE* OR "PeBDE" OR "DE 71" OR "DE71" OR "pentabrominated diphenyl" OR "pentabrominated diphenyls" OR "PBDPO" OR "Planelon PB 501" OR (pentabromo NEXT/1 deriv*) OR Pentabromophenyl* OR octabromodiphenyl* OR OctaBDE* OR "OcBDE" OR "Octabrom" OR "OBDE" OR "OBDPO" OR (octabromo NEXT/1 deriv*) OR "octabrominated diphenyl" OR "octabrominated diphenyls" OR decabromodiphenyl* OR DecaBDE* OR "DeBDE" OR "DBDPO" OR "decabrominated diphenyl" OR "decabrominated diphenyls" OR (decabromo NEXT/1 deriv*) OR "Decabrom" OR "Berkflam B 10E" OR "FR 300BA" OR "FR 300 BA" OR tribromodiphenyl* OR "tribrominated diphenyl" OR "tribrominated diphenyls" OR "TrBDE" OR (tribromo NEXT/1 deriv*) OR tetrabromodiphenyl* OR TetraBDE* OR "TeBDE" OR "TBDE" OR "BPDE" OR (tetrabromo NEXT/1 deriv*) OR "TBDP" OR "tetrabrominated diphenyl" OR "tetrabrominated diphenyls" OR hexabromodiphenyl* OR HexaBDE* OR "HxBDE" OR "hexabrominated diphenyl" OR "hexabrominated diphenyls" OR |

|                                                                    |                                                                                                                                                                                                                                                                                                                                                                                                                                                                                                                                                                                                                                                                                                                                                                                                                                                                                                                                                                                                                                                                                                                                                                                                                                                                                                                                                                                                                                                                                                                                                                                                                                                                                                                                                                                                                                                                                                                                                                                                                                                                                                                                                                                                                                                                                                                                                                                        |
|--------------------------------------------------------------------|----------------------------------------------------------------------------------------------------------------------------------------------------------------------------------------------------------------------------------------------------------------------------------------------------------------------------------------------------------------------------------------------------------------------------------------------------------------------------------------------------------------------------------------------------------------------------------------------------------------------------------------------------------------------------------------------------------------------------------------------------------------------------------------------------------------------------------------------------------------------------------------------------------------------------------------------------------------------------------------------------------------------------------------------------------------------------------------------------------------------------------------------------------------------------------------------------------------------------------------------------------------------------------------------------------------------------------------------------------------------------------------------------------------------------------------------------------------------------------------------------------------------------------------------------------------------------------------------------------------------------------------------------------------------------------------------------------------------------------------------------------------------------------------------------------------------------------------------------------------------------------------------------------------------------------------------------------------------------------------------------------------------------------------------------------------------------------------------------------------------------------------------------------------------------------------------------------------------------------------------------------------------------------------------------------------------------------------------------------------------------------------|
|                                                                    | (hexabromo NEXT/1 deriv*) OR heptabromodiphenyl* OR HeptaBDE* OR "HeBDE" OR "heptabrominated diphenyl" OR "heptabrominated diphenyls" OR (heptabromo NEXT/1 deriv*) OR nonabromodiphenyl* OR NonaBDE* OR "NoBDE" OR "nonabrominated diphenyl" OR "nonabrominated diphenyls" OR (nonabromo NEXT/1 deriv*):ti,ab,tn,rn                                                                                                                                                                                                                                                                                                                                                                                                                                                                                                                                                                                                                                                                                                                                                                                                                                                                                                                                                                                                                                                                                                                                                                                                                                                                                                                                                                                                                                                                                                                                                                                                                                                                                                                                                                                                                                                                                                                                                                                                                                                                   |
| #3<br>Substance CAS number:<br>title, abstract, registry<br>number | ("7025-06-1" OR "6876-00-2" OR "101-55-3" OR "51452-87-0" OR "446254-14-4" OR "147217-72-9" OR "171977-44-9" OR "147217-71-8" OR "33513-66-3" OR "51930-04-2" OR "6903-63-5" OR "189084-59-1" OR "83694-71-7" OR "46438-88-4" OR "2050-47-7" OR "147217-74-1" OR "147217-75-2" OR "407606-55-7" OR "147217-73-0" OR "147217-76-3" OR "337513-67-4" OR "446254-15-5" OR "446254-16-6" OR "147217-77-4" OR "337513-75-4" OR "337513-53-8" OR "41318-75-6" OR "337513-56-1" OR "155999-95-4" OR "65075-08-3" OR "189084-60-4" OR "147217-78-5" OR "446254-17-7" OR "147217-80-9" OR "147217-79-6" OR "147217-81-0" OR "337513-54-9" OR "337513-68-5" OR "446254-18-8" OR "446254-19-9" OR "446254-20-2" OR "446254-22-4" OR "5436-43-1" OR "337513-55-0" OR "243982-82-3" OR "446254-23-5" OR "189084-57-9" OR "446254-24-6" OR "446254-25-7" OR "446254-31-5" OR "446254-32-6" OR "446254-33-7" OR "446254-34-8" OR "189084-61-5" OR "446254-37-1" OR "446254-38-2" OR "327185-09-1" OR "446254-39-3" OR "189084-62-6" OR "446254-40-6" OR "446254-41-7" OR "446254-42-8" OR "189084-63-7" OR "446254-43-9" OR "93703-48-1" OR "446254-45-1" OR "446254-48-4" OR "103173-66-6" OR "446254-50-8" OR "446254-51-9" OR "182346-21-0" OR "446254-53-1" OR "446254-54-2" OR "446254-55-3" OR "446254-55-3" OR "446254-57-5" OR "446254-59-7" OR "446254-61-1" OR "446254-64-4" OR "38463-82-0" OR "60348-60-9" OR "189084-64-8" OR "446254-65-5" OR "446254-66-6" OR "446254-67-7" OR "446254-68-8" OR "373594-78-6" OR "446254-69-9" OR "446254-71-3" OR "446254-72-4" OR "446254-74-6" OR "446254-77-9" OR "446254-78-0" OR "189084-65-9" OR "446254-80-4" OR "189084-66-0" OR "182677-30-1" OR "243982-83-4" OR "68631-49-2" OR "207122-15-4" OR "35854-94-5" OR "189084-58-0" OR "189084-67-1" OR "207122-16-5" OR "189084-68-2" OR "1163-19-5" OR "109945-70-2" OR "113152-37-7" OR "113172-79-5" OR "139598-16-6" OR "139749-52-3" OR "145538-74-5" OR "32534-81-9" OR "32536-52-0" OR "40088-47-9" OR "446254-27-9" OR "446255-20-5" OR "446255-22-7" OR "49690-94-0" OR "63936-56-1" OR "64589-00-0" OR "68928-80-3" OR "85446-17-9" OR "36483-60-0" OR "437701-79-6" OR "446255-26-1" OR "117948-63-7" OR "446255-30-7" OR "61262-53-1" OR "405237-85-6" OR "39275-89-3" OR "13654-09-6" OR "61288-13-9" OR "446255-39-6" OR "337513-72-1" OR "366791-32-4" OR "2050-47-7"):ti,ab,rn |
| #4                                                                 | #1 OR #2 OR #3                                                                                                                                                                                                                                                                                                                                                                                                                                                                                                                                                                                                                                                                                                                                                                                                                                                                                                                                                                                                                                                                                                                                                                                                                                                                                                                                                                                                                                                                                                                                                                                                                                                                                                                                                                                                                                                                                                                                                                                                                                                                                                                                                                                                                                                                                                                                                                         |

|                                                        |                                                                                                                                                                                                                                                                                                                                                                                                                                                                                                                                                                                                                                                                                                                                                                                                                                                                                                                                                                                                                                                                                                                                                                                                                                                                                                                                                                                                                                                                                                                                                                                                                                                                                                                                                                                                                                                                                                |
|--------------------------------------------------------|------------------------------------------------------------------------------------------------------------------------------------------------------------------------------------------------------------------------------------------------------------------------------------------------------------------------------------------------------------------------------------------------------------------------------------------------------------------------------------------------------------------------------------------------------------------------------------------------------------------------------------------------------------------------------------------------------------------------------------------------------------------------------------------------------------------------------------------------------------------------------------------------------------------------------------------------------------------------------------------------------------------------------------------------------------------------------------------------------------------------------------------------------------------------------------------------------------------------------------------------------------------------------------------------------------------------------------------------------------------------------------------------------------------------------------------------------------------------------------------------------------------------------------------------------------------------------------------------------------------------------------------------------------------------------------------------------------------------------------------------------------------------------------------------------------------------------------------------------------------------------------------------|
| <p>#5<br/>Outcome terms:<br/>controlled vocabulary</p> | <p>'psychologic test'/de OR 'aptitude test'/exp OR 'Child Behavior Checklist'/exp OR 'intelligence test'/exp OR 'language test'/exp OR 'learning test'/exp OR 'mental test'/exp OR 'neuropsychological test'/exp OR 'psychologic assessment'/exp OR 'Wechsler Memory Scale'/exp OR 'mental disease'/de OR 'behavior disorder'/exp OR 'learning disorder'/exp OR 'memory disorder'/exp OR 'mental deficiency'/exp OR 'mental function'/de OR 'cognition'/exp OR 'sensorimotor function'/exp OR 'behavior'/de OR 'adolescent behavior'/de OR 'aggression'/exp OR 'behavior change'/exp OR 'behavior control'/exp OR 'child behavior'/exp OR 'motor activity'/exp OR 'hyperkinesia'/exp OR 'verbal behavior'/exp OR 'behavior assessment'/de OR 'individual behavior assessment'/exp OR 'mental disease assessment'/de OR 'behavior disorder assessment'/de OR 'mental function assessment'/de OR 'cognition assessment'/exp OR 'psychophysiologic assessment'/exp OR 'human development'/exp OR 'neurotoxicity'/exp OR 'developmental disorder'/exp OR 'disorders of higher cerebral function'/exp OR 'motor performance'/exp OR 'nervous system development'/de OR 'brain development'/exp</p>                                                                                                                                                                                                                                                                                                                                                                                                                                                                                                                                                                                                                                                                                                  |
| <p>#6<br/>Outcome terms: title,<br/>abstract</p>       | <p>(neurodevelopment* OR neurotoxic* OR neurobehav* OR neuropsychologic* OR neurocogniti* OR psychologic* OR aptitude* OR mental* OR intelligence* OR "IQ" OR intellectual* OR language* OR comprehension* OR impulsiv* OR "ADHD" OR "ADDH" OR "ADHS" OR "AD/HD" OR "hkd" OR hyperactiv* OR (hyper NEXT/1 active*) OR hyperkin* OR (hyper NEXT/1 kin*) OR "inattention" OR inattentiv* OR "distractibility" OR Behavioral* OR behavioural* OR "sustained attention" OR "attention span" OR "attention related" OR (attention* NEAR/3 defic*) OR (attention* NEAR/3 dysfunc*) OR (attention* NEAR/3 disorder*) OR (behav* NEAR/3 defic*) OR (behav* NEAR/3 dysfunc*) OR (behav* NEAR/3 disorder*) OR (disrupt* NEAR/3 disorder*) OR (disrupt* NEAR/3 behav*) OR (defian* NEAR/3 disorder*) OR (defian* NEAR/3 behav*) OR (behav* NEXT/1 effect*) OR (behav* NEXT/1 checklist*) OR (spontaneous NEXT/1 behav*) OR (externalizing NEXT/1 behav*) OR "cognitive" OR "cognition" OR "psychomotor" OR "learning" OR "memory" OR (executive NEXT/1 function*) OR "executive control" OR "executive dysfunction" OR "executive impairment" OR (motor NEXT/1 abiliti*) OR "motor performance" OR (motor NEXT/1 function*) OR (motor NEXT/1 skill*) OR (motor NEXT/1 activit*) OR "fine motor" OR "vigilance" OR "reaction time" OR "processing speed" OR "response inhibition" OR "Stanford Binet" OR "Binet Test" OR "Binet tests" OR "Bender Gestalt Test" OR "Aphasia Test" OR "Aphasia Tests" OR Bayley* OR "Wechsler" OR "WISC" OR "McCarthy Scale" OR "McCarthy Scales" OR "Continuous Performance Test" OR "Continuous Performance Tests" OR "Continuous Performance Task" OR "Continuous Performance Tasks" OR Conners* OR "CRS-T" OR "CRS-P" OR "academic achievement" OR "scholastic achievement" OR (brain NEAR/3 disorder*) OR (brain NEAR/3 damage*) OR (brain NEAR/3 dysfunc*)):ti,ab</p> |
| <p>#7</p>                                              | <p>#5 OR #6</p>                                                                                                                                                                                                                                                                                                                                                                                                                                                                                                                                                                                                                                                                                                                                                                                                                                                                                                                                                                                                                                                                                                                                                                                                                                                                                                                                                                                                                                                                                                                                                                                                                                                                                                                                                                                                                                                                                |
| <p>#8</p>                                              | <p>#4 AND #7</p>                                                                                                                                                                                                                                                                                                                                                                                                                                                                                                                                                                                                                                                                                                                                                                                                                                                                                                                                                                                                                                                                                                                                                                                                                                                                                                                                                                                                                                                                                                                                                                                                                                                                                                                                                                                                                                                                               |

*Toxline and DART:*

| Search                            | Toxline                                                                                                                                                                                                                                                                                                                                                                                                                                                                                                                                                                                                                                                                                                                                                                                                                                                                                                                        |
|-----------------------------------|--------------------------------------------------------------------------------------------------------------------------------------------------------------------------------------------------------------------------------------------------------------------------------------------------------------------------------------------------------------------------------------------------------------------------------------------------------------------------------------------------------------------------------------------------------------------------------------------------------------------------------------------------------------------------------------------------------------------------------------------------------------------------------------------------------------------------------------------------------------------------------------------------------------------------------|
| #1<br>Substance terms: all fields | "flame retard*" OR "fire retard*" OR "fireproofing agent*" OR "FireMaster" OR "Bromkal" OR "diphenal ether derivative" OR "Halogenated Diphenyl" OR "Brominated Diphenyl" OR PBDE* OR "Polybrominated Diphenyl" OR polybromodiphenyl* OR PBDP* OR BDE* OR pentabromodiphenyl* OR "c-pentaBDE*" OR PentaBDE* OR "PeBDE" OR "DE 71" OR "DE71" OR "pentabrominated diphenyl" OR "PBDPO" OR "Planelon PB 501" OR "pentabromo deriv*" OR Pentabromophenyl*                                                                                                                                                                                                                                                                                                                                                                                                                                                                          |
| #2<br>Substance terms: all fields | octabromodiphenyl* OR "c-octaBDE*" OR OctaBDE* OR OcBDE OR Octabrom OR "octabromo deriv*" OR OBDE OR OBDPO OR "octabrominated diphenyl" OR decabromodiphenyl* OR "c-decaBDE*" OR DecaBDE* OR DeBDE OR DBDPO OR "decabrominated diphenyl" OR "decabromo deriv*" OR Decabrom OR "Berkflam B 10E" OR "FR 300BA" OR "FR 300 BA" OR tribromodiphenyl* OR "tribrominated diphenyl" OR TrBDE OR "tribromo deriv*" OR tetrabromodiphenyl* OR TetraBDE* OR TeBDE OR TBDE OR BPDE OR "tetrabromo deriv*" OR TBDP OR "tetrabrominated diphenyl" OR hexabromodiphenyl* OR HexaBDE* OR HxBDE OR "hexabrominated diphenyl" OR "hexabromo deriv*" OR heptabromodiphenyl* OR HeptaBDE* OR HeBDE OR "heptabrominated diphenyl" OR "heptabromo deriv*" OR nonabromodiphenyl* OR NonaBDE* OR NoBDE OR "nonabrominated diphenyl" OR "nonabromo deriv*"                                                                                             |
| #3<br>Substance terms: all fields | "7025-06-1" OR "6876-00-2" OR "101-55-3" OR "51452-87-0" OR "446254-14-4" OR "147217-72-9" OR "171977-44-9" OR "147217-71-8" OR "33513-66-3" OR "51930-04-2" OR "6903-63-5" OR "189084-59-1" OR "83694-71-7" OR "46438-88-4" OR "2050-47-7" OR "147217-74-1" OR "147217-75-2" OR "407606-55-7" OR "147217-73-0" OR "147217-76-3" OR "337513-67-4" OR "446254-15-5" OR "446254-16-6" OR "147217-77-4" OR "337513-75-4" OR "337513-53-8" OR "41318-75-6" OR "337513-56-1" OR "155999-95-4" OR "65075-08-3" OR "189084-60-4" OR "147217-78-5" OR "446254-17-7" OR "147217-80-9" OR "147217-79-6" OR "147217-81-0" OR "337513-54-9" OR "337513-68-5" OR "446254-18-8" OR "446254-19-9" OR "446254-20-2" OR "446254-22-4" OR "5436-43-1" OR "337513-55-0" OR "243982-82-3" OR "446254-23-5" OR "189084-57-9" OR "446254-24-6" OR "446254-25-7" OR "446254-31-5" OR "446254-32-6" OR "446254-33-7" OR "446254-34-8" OR "189084-61-5" |
| #4<br>Substance terms: all fields | "446254-37-1" OR "446254-38-2" OR "327185-09-1" OR "446254-39-3" OR "189084-62-6" OR "446254-40-6" OR "446254-41-7" OR "446254-42-8" OR "189084-63-7" OR "446254-43-9" OR "93703-48-1" OR "446254-45-1" OR "446254-48-4" OR "103173-66-6" OR "446254-50-8" OR "446254-51-9" OR "182346-21-0" OR "446254-53-1" OR "446254-54-2" OR "446254-55-3" OR "446254-55-3" OR "446254-57-5" OR "446254-59-7" OR "446254-61-1" OR "446254-64-4" OR "38463-82-0" OR "60348-60-9" OR "189084-64-8" OR "446254-65-5" OR "446254-66-6" OR "446254-67-7" OR "446254-68-8" OR "373594-78-6" OR "446254-69-9" OR "446254-71-3" OR "446254-72-4" OR "446254-74-6" OR "446254-77-9" OR "446254-78-0" OR "189084-65-9" OR "446254-80-4" OR "189084-66-0" OR "182677-30-1" OR "243982-83-4"                                                                                                                                                          |
| #5<br>Substance terms: all        | "68631-49-2" OR "207122-15-4" OR "35854-94-5" OR "189084-58-0" OR "189084-67-1" OR "207122-16-5" OR "189084-68-2" OR "1163-19-5" OR                                                                                                                                                                                                                                                                                                                                                                                                                                                                                                                                                                                                                                                                                                                                                                                            |

|                                  |                                                                                                                                                                                                                                                                                                                                                                                                                                                                                                                              |
|----------------------------------|------------------------------------------------------------------------------------------------------------------------------------------------------------------------------------------------------------------------------------------------------------------------------------------------------------------------------------------------------------------------------------------------------------------------------------------------------------------------------------------------------------------------------|
| fields                           | "109945-70-2" OR "113152-37-7" OR "113172-79-5" OR "139598-16-6" OR "139749-52-3" OR "145538-74-5" OR "32534-81-9" OR "32536-52-0" OR "40088-47-9" OR "446254-27-9" OR "446255-20-5" OR "446255-22-7" OR "49690-94-0" OR "63936-56-1" OR "64589-00-0" OR "68928-80-3" OR "85446-17-9" OR "36483-60-0" OR "437701-79-6" OR "446255-26-1" OR "117948-63-7" OR "446255-30-7" OR "61262-53-1" OR "405237-85-6" OR "39275-89-3" OR "13654-09-6" OR "61288-13-9" OR "446255-39-6" OR "337513-72-1" OR "366791-32-4" OR "2050-47-7" |
| #6                               | #1 OR #2 OR #3 OR #4 OR #5                                                                                                                                                                                                                                                                                                                                                                                                                                                                                                   |
| #7<br>Outcome terms: all fields  | Neurodevelopment* OR Neurotoxic* OR Neurobehav* OR Neuropsychologic* OR neurocogniti* OR Psychologic* OR Aptitude* OR mental* OR intelligence* OR "IQ" OR Intellectual* OR Language* OR Comprehension*                                                                                                                                                                                                                                                                                                                       |
| #8<br>Outcome terms: all fields  | Impulsiv* OR "ADHD" OR "ADDH" OR "ADHS" OR "AD/HD" OR "hkd" OR hyperactiv* OR "hyper activ*" OR hyperkin* OR "hyper kin*"                                                                                                                                                                                                                                                                                                                                                                                                    |
| #9<br>Outcome terms: all fields  | "attention defic*" OR "attention related*" OR inattention* OR inattentiv* OR "sustained attention" OR "attention span" OR "attention dysfunc*" OR "attention disorder*" OR "distractibility"                                                                                                                                                                                                                                                                                                                                 |
| #10<br>Outcome terms: all fields | Behavioral* OR behavioural* OR "behavior defic*" OR "behaviour defic*" OR "behavior dysfunc*" OR "behaviour dysfunc*" OR "behavior disorder*" OR "behaviour disorder*"                                                                                                                                                                                                                                                                                                                                                       |
| #11<br>Outcome terms: all fields | "behavior effect*" OR "behaviour effect*" OR "behavior checklist*" OR "behaviour checklist*" OR "disruptive behav*" OR "disruption behav*" OR "disruptive disorder*" OR "disruption disorder*" OR "defiance behav*" OR "defiant behav*" OR "defiance disorder*" OR "defiant disorder*"                                                                                                                                                                                                                                       |
| #12<br>Outcome terms: all fields | "spontaneous behav*" OR "externalizing behav*" OR "cognitive" OR "cognition" OR "Psychomotor" OR "learning" OR "memory" OR "vigilance" OR "reaction time" OR "processing speed" OR "response inhibition"                                                                                                                                                                                                                                                                                                                     |
| #13<br>Outcome terms: all fields | "executive function*" OR "executive control*" OR "executive dysfunction*" OR "executive impairment*" OR "motor abilit*" OR "motor activit*" OR "motor function*" OR "motor skill*" OR "fine motor" OR "motor performance"                                                                                                                                                                                                                                                                                                    |
| #14<br>Outcome terms: all fields | "Binet" OR "Bender Gestalt Test" OR "Aphasia Test*" OR Bayley* OR "Wechsler" OR "WISC" OR "McCarthy Scale*" OR "Continuous Performance Test*" OR "Continuous Performance Task*" OR Conners* OR "CRS-T" OR "CRS-P"                                                                                                                                                                                                                                                                                                            |
| #15<br>Outcome terms: all fields | "academic achievement" OR "scholastic achievement" OR "brain disorder*" OR "brain damage*" OR "brain dysfunc*"                                                                                                                                                                                                                                                                                                                                                                                                               |
| #16<br>Outcome terms: all fields | #7 OR #8 OR #9 OR #10 OR #11 OR #12 OR #13 OR #14 OR #15                                                                                                                                                                                                                                                                                                                                                                                                                                                                     |
| #17<br>Outcome terms: all fields | #6 AND #16                                                                                                                                                                                                                                                                                                                                                                                                                                                                                                                   |



**Table S2: Toxicological websites and grey literature databases searched**

| <i>Toxicological websites</i>                                                                                                                                                                                                                                                                                                                                                                                                                                                                                                                                                                                                                                                                                                                                                                                                                                                                                                                                                                                                                                                                                                                                                                                                                                                                                                                                                                                                                                                                                                                                                                                                                                                                                                                                                                                                                                                                                                                                                                                                                                                                                                                                                                                                                                                                                                                                                                                                                                                                                                                                                                                                                                                                                                                                                                                                                                                                        | <i>Grey literature databases</i>                                                                                                                                                                                                                                                                                                                                                                                                                                                                                                                                                                                                                                                                                                                                                       |
|------------------------------------------------------------------------------------------------------------------------------------------------------------------------------------------------------------------------------------------------------------------------------------------------------------------------------------------------------------------------------------------------------------------------------------------------------------------------------------------------------------------------------------------------------------------------------------------------------------------------------------------------------------------------------------------------------------------------------------------------------------------------------------------------------------------------------------------------------------------------------------------------------------------------------------------------------------------------------------------------------------------------------------------------------------------------------------------------------------------------------------------------------------------------------------------------------------------------------------------------------------------------------------------------------------------------------------------------------------------------------------------------------------------------------------------------------------------------------------------------------------------------------------------------------------------------------------------------------------------------------------------------------------------------------------------------------------------------------------------------------------------------------------------------------------------------------------------------------------------------------------------------------------------------------------------------------------------------------------------------------------------------------------------------------------------------------------------------------------------------------------------------------------------------------------------------------------------------------------------------------------------------------------------------------------------------------------------------------------------------------------------------------------------------------------------------------------------------------------------------------------------------------------------------------------------------------------------------------------------------------------------------------------------------------------------------------------------------------------------------------------------------------------------------------------------------------------------------------------------------------------------------------|----------------------------------------------------------------------------------------------------------------------------------------------------------------------------------------------------------------------------------------------------------------------------------------------------------------------------------------------------------------------------------------------------------------------------------------------------------------------------------------------------------------------------------------------------------------------------------------------------------------------------------------------------------------------------------------------------------------------------------------------------------------------------------------|
| <ul style="list-style-type: none"> <li>• ATSDR Interaction Profiles<br/><a href="http://www.atsdr.cdc.gov/interactionprofiles/index.asp">http://www.atsdr.cdc.gov/interactionprofiles/index.asp</a></li> <li>• ATSDR Toxicological Profiles<br/><a href="http://www.atsdr.cdc.gov/toxprofiles/index.asp">http://www.atsdr.cdc.gov/toxprofiles/index.asp</a></li> <li>• CalEPA Office of Environmental Health Hazard Assessment<br/><a href="http://www.oehha.ca.gov/risk.html">http://www.oehha.ca.gov/risk.html</a>,<br/><a href="http://oehha.ca.gov/air.html">http://oehha.ca.gov/air.html</a></li> <li>• Chem ID <a href="http://chem.sis.nlm.nih.gov/chemidplus/">http://chem.sis.nlm.nih.gov/chemidplus/</a></li> <li>• DART <a href="http://toxnet.nlm.nih.gov/newtoxnet/dart.htm">http://toxnet.nlm.nih.gov/newtoxnet/dart.htm</a></li> <li>• EPA Acute Exposure Guideline Levels<br/><a href="http://www.epa.gov/oppt/aegl/chemlist.htm">http://www.epa.gov/oppt/aegl/chemlist.htm</a></li> <li>• EPA IRIS internet <a href="http://www.epa.gov/iris">www.epa.gov/iris</a></li> <li>• EPA NEPIS and NSCEP <a href="http://www.epa.gov/nscep/">http://www.epa.gov/nscep/</a></li> <li>• EPA Science Inventory <a href="http://cfpub.epa.gov/si/">http://cfpub.epa.gov/si/</a></li> <li>• EPA Substance Registry System<br/><a href="http://ofmpub.epa.gov/sor_internet/registry/substreg/searchandretrieve/substancesearch/search.do">http://ofmpub.epa.gov/sor_internet/registry/substreg/searchandretrieve/substancesearch/search.do</a></li> <li>• Health Canada First Priority List Assessments<br/><a href="http://www.hcsc.gc.ca/hecs_sesc/exsd/psl1.htm">http://www.hcsc.gc.ca/hecs_sesc/exsd/psl1.htm</a></li> <li>• Health Canada Second Priority List Assessments<br/><a href="http://www.hcsc.gc.ca/hecs_sesc/exsd/psl2.htm">http://www.hcsc.gc.ca/hecs_sesc/exsd/psl2.htm</a></li> <li>• Hazardous Substances Data Bank<br/><a href="http://toxnet.nlm.nih.gov/cgi-bin/sis/htmlgen?HSDB">http://toxnet.nlm.nih.gov/cgi-bin/sis/htmlgen?HSDB</a></li> <li>• IPCS INCHEM <a href="http://www.inchem.org/">http://www.inchem.org/</a></li> <li>• NIOSHTIC 2 <a href="http://www2.cdc.gov/nioshtic2/Nioshtic2.htm">http://www2.cdc.gov/nioshtic2/Nioshtic2.htm</a></li> <li>• Toxicology Data Network <a href="http://toxnet.nlm.nih.gov/">http://toxnet.nlm.nih.gov/</a></li> <li>• RTECS Toxcenter<br/><a href="http://www.cdc.gov/niosh/rtecs/default.html">http://www.cdc.gov/niosh/rtecs/default.html</a></li> <li>• WHO assessments – CICADS, EHC<br/><a href="http://www.who.int/ipcs/assessment/en/">http://www.who.int/ipcs/assessment/en/</a></li> <li>• USEPA Health and Environmental Studies Online<br/><a href="http://hero.epa.gov/">http://hero.epa.gov/</a></li> <li>• FIFRA docket: <a href="http://www.regulations.gov">http://www.regulations.gov</a></li> </ul> | <ul style="list-style-type: none"> <li>• Google: <a href="http://www.google.com">http://www.google.com</a></li> <li>• Google Scholar: <a href="http://scholar.google.com/">http://scholar.google.com/</a></li> <li>• Database of federally-funded scientific research: <a href="http://Science.gov">Science.gov</a></li> <li>• ScienceResearch.com (Science federated search engine by Deep Web Technologies):<br/><a href="http://scienceresearch.com/">http://scienceresearch.com/</a></li> <li>• Oaister database (an open-source repository of difficult-to-access, academically-oriented digital resources): <a href="http://www.oclc.org/oaister">http://www.oclc.org/oaister</a></li> <li>• Open Grey: <a href="http://www.opengrey.eu/">http://www.opengrey.eu/</a></li> </ul> |

**Table S3: Data Extraction Fields and Description**

| Field                                                 | Tab              | Field Type | Instructions                                                                                                                                                                                                                                                                                                                                                                                                                                                                                              |
|-------------------------------------------------------|------------------|------------|-----------------------------------------------------------------------------------------------------------------------------------------------------------------------------------------------------------------------------------------------------------------------------------------------------------------------------------------------------------------------------------------------------------------------------------------------------------------------------------------------------------|
| Study Design*                                         | Gen. Study Info. | Combo Box  | Study Design: Choose the study design type from the dropdown list.                                                                                                                                                                                                                                                                                                                                                                                                                                        |
| Chemical                                              | Gen. Study Info. | Combo Box  | Choose the chemical evaluated in the study. If the chemical does not exist in the drop down list, it needs to be associated with the assessment in the "Assessment Management Tools" of the main form.                                                                                                                                                                                                                                                                                                    |
| Source of Funding                                     | Gen. Study Info. | Text Box   | Study funding source details: Indicate the source of funding for this study. This text may appear in appendix tables so be as concise as possible by using acronyms for common funding sources (US EPA, NSF, NIH/NIEHS) and NOT including grant numbers. Examples: US EPA, NIH/NIEHS, NIH/NIDDK. More specific information on funding, e.g., grant number, can be added as a field note (if desired)                                                                                                      |
| Does the author report a COI or financial disclosure? | Gen. Study Info. | Combo Box  | Authors' declared conflicts of interest: Indicate whether the authors report a conflict of interest (COI) or financial disclosure.                                                                                                                                                                                                                                                                                                                                                                        |
| COI details                                           | Gen. Study Info. | Text Box   | Conflict of Interest Details: Enter details about the COI if reported by the authors. This will not happen often.                                                                                                                                                                                                                                                                                                                                                                                         |
| Source of Funding Type                                | Gen. Study Info. | Combo Box  | Study funding source: Select the source of funding type.                                                                                                                                                                                                                                                                                                                                                                                                                                                  |
| General Study Objectives                              | Gen. Study Info. | Text Box   | What are the study objectives?: Enter a brief description of the study objectives.                                                                                                                                                                                                                                                                                                                                                                                                                        |
| Description of Population                             | Study Population | Text Box   | Cohort: Enter the official name of the cohort or another brief description of the population studied (e.g., distinguishing feature, job occupation, type of clinical population, or work site). Only capitalize proper nouns; separate phrases with semicolons; no ending punctuation. Examples: "HEALS" "Northwestern Taiwan residents" "NHANES" "glass industry workers employed for more than 10 yrs." "Yucheng residents over age 60 exposed to contaminated rice oil and similar unexposed subjects" |
| Lifestage                                             | Study Population | Combo Box  | Select a descriptor for the population that comprises the cohort.                                                                                                                                                                                                                                                                                                                                                                                                                                         |
| Country(ies)                                          | Study Population | Text Box   | Sites of Data Collection, Country: Select the country where the study population was observed. If multiple countries were studied, use the "add multi" button to select more than one. To save time looking through the list, you can begin typing the country name and DRAGON will provide auto-fill options.                                                                                                                                                                                            |
| Region                                                | Study Population | Text Box   | Sites of Data Collection, Region: Enter the region(s) where the study population is observed; use the most specific region information available and separate multiple entries with a semicolon (;). List US locations as: City, ST (two letter state abbreviation). If just an area, write: northwest (direction with lower case).                                                                                                                                                                       |
| State(s)                                              | Study Population | Combo Box  | Sites of Data Collection, State: Choose the state if in United States.                                                                                                                                                                                                                                                                                                                                                                                                                                    |

| Field                                                 | Tab              | Field Type | Instructions                                                                                                                                                                                                                                                                                                                                                                                                                                                                                                                                                                                                                                                                                                                                                                     |
|-------------------------------------------------------|------------------|------------|----------------------------------------------------------------------------------------------------------------------------------------------------------------------------------------------------------------------------------------------------------------------------------------------------------------------------------------------------------------------------------------------------------------------------------------------------------------------------------------------------------------------------------------------------------------------------------------------------------------------------------------------------------------------------------------------------------------------------------------------------------------------------------|
| Demographic Data Type                                 | Study Population | Text Box   | Age and Co-morbidities, variable: Enter the name of the demographic variable, such as "age" or "education status". Enter for age for all experimental groups where data are available and also for any other comorbidities listed in the study.                                                                                                                                                                                                                                                                                                                                                                                                                                                                                                                                  |
| Population/Sub-group                                  | Study Population | Text Box   | Age and Co-morbidities, population: Enter the population or subgroup you want to enter data for. This might be "total population", "exposed", "unexposed", "cases", etc.                                                                                                                                                                                                                                                                                                                                                                                                                                                                                                                                                                                                         |
| Demographic Description                               | Study Population | Text Box   | Age and Co-morbidities, description: Enter a description of the demographic being entered. For example, if you chose a demographic variable that is categorical, you enter each of the categories in different rows. An example might be the demographic variable "Smoking status" where the demographic descriptions would be "Currently smoked", "Stopped Smoking within last 5 years", "Never smoked", etc.                                                                                                                                                                                                                                                                                                                                                                   |
| Format                                                | Study Population | Combo Box  | Age and Co-morbidities, format: Select the format of the data. This will indicate whether the data presented in the paper are means, means with standard deviations, ranges, etc.                                                                                                                                                                                                                                                                                                                                                                                                                                                                                                                                                                                                |
| Centrality                                            | Study Population | Text Box   | Autopopulates based on the demographic data format.                                                                                                                                                                                                                                                                                                                                                                                                                                                                                                                                                                                                                                                                                                                              |
| Centrality Value                                      | Study Population | Text Box   | Enter the demographic value.                                                                                                                                                                                                                                                                                                                                                                                                                                                                                                                                                                                                                                                                                                                                                     |
| Variance                                              | Study Population | Text Box   | Autopopulates based on the demographic data format.                                                                                                                                                                                                                                                                                                                                                                                                                                                                                                                                                                                                                                                                                                                              |
| Variance Value                                        | Study Population | Text Box   | Enter the demographic value.                                                                                                                                                                                                                                                                                                                                                                                                                                                                                                                                                                                                                                                                                                                                                     |
| Lower Limit                                           | Study Population | Text Box   | Autopopulates based on the demographic data format.                                                                                                                                                                                                                                                                                                                                                                                                                                                                                                                                                                                                                                                                                                                              |
| Upper Limit Value                                     | Study Population | Text Box   | Enter the demographic value.                                                                                                                                                                                                                                                                                                                                                                                                                                                                                                                                                                                                                                                                                                                                                     |
| Evaluation of Population                              | Study Population | Text Box   | Enter any additional population information from related studies that supplements the information from this main study.                                                                                                                                                                                                                                                                                                                                                                                                                                                                                                                                                                                                                                                          |
| Description of Reference Pop                          | Study Population | Text Box   | Description of reference group: Provide information on how the reference population was selected or recruited. For case-control study (one with exposed and unexposed individuals), how were controls or unexposed groups selected? "controls randomly selected to frequency match the cases by age and sex." If lowest exposure group selected as the reference group, describe and note any possible issues. Example, no issues: "all subjects recruited in same manner and group with water concentrations lower than 10 ppb used as reference group." Example, potential issues: "all subjects recruited in same manner; reference group consisted of subjects exposed to <10 ppb, however, group significantly younger than other exposure groups and age not adjusted for" |
| Exclusion Criteria                                    | Study Population | Text Box   | Inclusion/exclusion criteria/recruitment strategy: Describe the criteria used to exclude subjects in the study population. Complete sentences are not necessary. List separate elements with a semicolon in between; capitalize the very first letter; do not use a period at the end. If not specified in the paper, type "Not specified". Examples: "No glucose data available"                                                                                                                                                                                                                                                                                                                                                                                                |
| Number Eligible to Participate (N) - Cases or Exposed | Study Population | Text Box   | Sample size of cohort, eligible, exposed: Enter the size of the exposed population or number of cases eligible to participate in the study, if provided. For example, a cohort study might have a total population of 10,000 members although only a subset of the population was invited to participate in the specific study.                                                                                                                                                                                                                                                                                                                                                                                                                                                  |

| Field                                                      | Tab              | Field Type | Instructions                                                                                                                                                                                                                                                                                                                                                                                                                                                                                                                                                                                                                                                                    |
|------------------------------------------------------------|------------------|------------|---------------------------------------------------------------------------------------------------------------------------------------------------------------------------------------------------------------------------------------------------------------------------------------------------------------------------------------------------------------------------------------------------------------------------------------------------------------------------------------------------------------------------------------------------------------------------------------------------------------------------------------------------------------------------------|
| Number Eligible to Participate (N) - Controls or Reference | Study Population | Text Box   | Sample size of cohort, eligible, reference: Enter the size of the reference or control population eligible to participate in the study, if provided.                                                                                                                                                                                                                                                                                                                                                                                                                                                                                                                            |
| Number Eligible to Participate (N) - Total Population      | Study Population | Text Box   | Sample size of cohort, eligible, total: Enter the size of the population eligible to participate in the study, if provided. For example, a cohort study might have a total population of 10,000 members although only a subset of the population was invited to participate in the specific study.                                                                                                                                                                                                                                                                                                                                                                              |
| Number Invited to Participate (N) - Cases or Exposed       | Study Population | Text Box   | Sample size of cohort, invited, exposed: Enter the size of the exposed population before any were eliminated, missing, or lost. For case-control, enter number of cases.                                                                                                                                                                                                                                                                                                                                                                                                                                                                                                        |
| Number Invited to Participate (N) - Controls or Reference  | Study Population | Text Box   | Sample size of cohort, invited, reference: Enter the size of the reference or control population before any were eliminated, missing, or lost, if provided.                                                                                                                                                                                                                                                                                                                                                                                                                                                                                                                     |
| Number Invited to Participate (N) - Total Population       | Study Population | Text Box   | Sample size of cohort, invited, total: Primarily relevant to cohort and cross-sectional studies: Enter the size of the population invited to participate in the study, if provided. This will be compared to the study population size in order to determine the participation rates. For example, this population may include the entire region or occupational population prior to any applied inclusion and exclusion criteria. For case-control studies, SKIP and enter target population below in Exposed Population Metrics and Reference Population Metrics.                                                                                                             |
| Number Who Participated (N) - Cases or Exposed             | Study Population | Text Box   | Sample size of cohort, included, exposed: Enter the total number of subjects in the exposed group, minus any exposed subjects that were identified as a "reference" group. The sum of the exposed population size and the control population size should equal the study size.                                                                                                                                                                                                                                                                                                                                                                                                  |
| Number Who Participated (N) - Controls or Reference        | Study Population | Text Box   | Sample size of cohort, included, reference: Enter the total number of subjects in the control or "reference" group. The sum of the exposed population size and the control/reference population size should equal the study size.                                                                                                                                                                                                                                                                                                                                                                                                                                               |
| Number Who Participated (N) - Total Population             | Study Population | Text Box   | Sample size of cohort, included, total: Enter the size of the population that was eventually evaluated for exposure and health outcomes. This number should be less than or equal to the "target population" and represents the number of subjects in the study after the inclusion and exclusion criteria were applied to the target population. For example, this population may include the occupational population minus any prior smokers. Or, it may include all inhabitants of a region minus those that did not answer the door on the day of interview. May not be available for all studies or could be the sum of study populations for exposed and reference below. |
| Description of Losses in Selection and Recruitment Process | Study Population | Memo       | Participation/follow-up rates: If there was a follow-up period where the health status of subjects was followed but subjects were lost from the study, explain how this loss to follow-up was addressed in the statistical analysis. Use short phrases separated by semicolon (;). End with period (.). Example: "29 subjects lost to follow-up because they moved out of the region; excluded from statistical tests since health outcome could not be determined."                                                                                                                                                                                                            |
| (none)                                                     | Study Population | Combo Box  | Select a qualifier if the follow-up length was equal to, less, than, or greater than a specific duration.                                                                                                                                                                                                                                                                                                                                                                                                                                                                                                                                                                       |

| Field                                       | Tab                  | Field Type | Instructions                                                                                                                                                                                                                                                                                                                     |
|---------------------------------------------|----------------------|------------|----------------------------------------------------------------------------------------------------------------------------------------------------------------------------------------------------------------------------------------------------------------------------------------------------------------------------------|
| Length of Follow-up                         | Study Population     | Text Box   | Study duration: Length of the follow-up period when subjects were followed and assessed for health outcome. Enter a single number or a range as appropriate and add units (years, months, days); only enter for cohort (prospective or retrospective) studies or nested case-control studies. Examples: "5-17 years", "2 months" |
| Enrollment/recruitment Years                | Study Population     | Text Box   | Study dates: Enter the year or range of years when participants were followed.                                                                                                                                                                                                                                                   |
| Evaluation of Selection/recruitment Process | Study Population     | Text Box   | Study design details and other relevant details: enter any additional details related to study design or to the population selection as a whole.                                                                                                                                                                                 |
| Exposure Surrogate                          | Exposure Measurement | Combo Box  | Source of exposure data: specify whether the data are from biomonitoring-blood, biomonitoring-urine, environmental monitoring (include matrix in details), emissions-based models (include specific model in details), questionnaire (include specific determinant of exposure in details), or other (specify in details).       |
| Exposure Surrogate Units                    | Exposure Measurement | Text Box   | Select the units for the exposure surrogate. If the correct units are not here, enter them as a new entry. Do not convert the units; enter them exactly as they appear in the study.                                                                                                                                             |
| Exposure Measurement Level                  | Exposure Measurement | Combo Box  | Indicate whether exposure was measured at the group or individual level in the study. Blood, serum, plasma, urine, and hair measurements are often individual, while drinking water and diet measurements are often at the group level. Exceptions do occur.                                                                     |
| Format                                      | Exposure Measurement | Combo Box  | Exposure values for study group: Select the format of the data. This will indicate whether the data presented in the paper are means, means with standard deviations, ranges, etc.                                                                                                                                               |
| Centrality                                  | Exposure Measurement | Text Box   | Autopopulates based on the exposure format.                                                                                                                                                                                                                                                                                      |
| Centrality Value                            | Exposure Measurement | Text Box   | Enter the exposure value.                                                                                                                                                                                                                                                                                                        |
| Variance                                    | Exposure Measurement | Text Box   | Autopopulates based on the exposure format.                                                                                                                                                                                                                                                                                      |
| Variance Value                              | Exposure Measurement | Text Box   | Enter the exposure value.                                                                                                                                                                                                                                                                                                        |
| Lower Limit                                 | Exposure Measurement | Text Box   | Autopopulates based on the exposure format.                                                                                                                                                                                                                                                                                      |
| Lower Limit Value                           | Exposure Measurement | Text Box   | Enter the exposure value.                                                                                                                                                                                                                                                                                                        |
| Upper Limit                                 | Exposure Measurement | Text Box   | Autopopulates based on the exposure format.                                                                                                                                                                                                                                                                                      |
| Upper Limit Value                           | Exposure Measurement | Text Box   | Enter the exposure value.                                                                                                                                                                                                                                                                                                        |

| Field                        | Tab                  | Field Type | Instructions                                                                                                                                                                                                                                                                                                                                                                                                                                                                                                                                                                                                                                                               |
|------------------------------|----------------------|------------|----------------------------------------------------------------------------------------------------------------------------------------------------------------------------------------------------------------------------------------------------------------------------------------------------------------------------------------------------------------------------------------------------------------------------------------------------------------------------------------------------------------------------------------------------------------------------------------------------------------------------------------------------------------------------|
| Exposure Category Definition | Exposure Measurement | Text Box   | Enter a text descriptor that differentiates the current exposure category definition from others in the paper or others entered in DRAGON. Click the + to expand and see the exposure levels for a category. Should correspond to exposure surrogate units (i.e., they could be added to the end of this to make a phrase). This may include multiple descriptors in order to fully distinguish the entry. Usually, similar exposure metrics that were assessed separately for men and women should be entered as two separate exposure categories. Example: "Mean blood lead concentration, men". Example: "Mean drinking water concentration, women, no kidney disease". |
| Lifestage at exposure        | Exposure Measurement | Combo Box  | Exposure measurement timing: Select the life stage at which exposure occurred, if specified. Use "multiple" if exposure occurred over lifetime or if population ages vary. If not specified and you cannot extrapolate, choose "cannot be determined."                                                                                                                                                                                                                                                                                                                                                                                                                     |
| Source                       | Exposure Measurement | Text Box   | Source of Information: Enter the table or figure (or text) from which the exposure category and level data was extracted. Example: "Table 6, upper portion". Example: "Text, page 667, second paragraph"                                                                                                                                                                                                                                                                                                                                                                                                                                                                   |
| Sex                          | Exposure Measurement | Combo Box  | Sex: Enter the sex of subjects in each exposure category.                                                                                                                                                                                                                                                                                                                                                                                                                                                                                                                                                                                                                  |
| Description of Exposure      | Exposure Measurement | Text Box   | Exposure source details, range of concentrations, chemicals, and frequency: Enter details about the source of exposure data, list the range of concentrations of air pollution measured (list any specific components of air pollution) with units, and indicate the frequency of exposure measurements (if taken more than once) and the number of replicate measurements taken. Also, list any other chemical information here related to the air pollutants measured. Use complete sentences.                                                                                                                                                                           |
| Exposure Sampling Year Range | Exposure Measurement | Text Box   | Exposure measurement timing details: enter information about when exposure was measured, especially relative to when the outcomes were assessed.                                                                                                                                                                                                                                                                                                                                                                                                                                                                                                                           |
| Group                        | Exposure Measurement | Text Box   | Enter the population or subgroup you want to enter data for. This might be "total population", "exposed", "unexposed", "cases", etc.                                                                                                                                                                                                                                                                                                                                                                                                                                                                                                                                       |
| Evaluation of Exposure       | Exposure Measurement | Text Box   | Enter any additional exposure information from related studies that supplements the information from this main study.                                                                                                                                                                                                                                                                                                                                                                                                                                                                                                                                                      |
| Search:                      | Outcome Measurement  | Text Box   | Type a search term and select the filter button to limit the endpoint list.                                                                                                                                                                                                                                                                                                                                                                                                                                                                                                                                                                                                |
| Outcome                      | Outcome Measurement  | Text Box   | Outcomes measured, controlled vocabulary: The health outcome name is from a controlled vocabulary list. Double click from the list above to add the outcome to the list. You can also use the search bar to help find a particular word in the outcomes list. The study may call the health outcome something slightly different. Please contact a manager if you are unsure what health outcome to select. Also find the checkboxes at the end of the row. Check the first if the health outcomes have no statistical results reported in the paper. In the second, check if the statistical results are not being entered in epiDRAGON at this time.                     |

| Field                          | Tab                      | Field Type | Instructions                                                                                                                                                                                                                                                                                                                                                                                                                                                                                                                                                                            |
|--------------------------------|--------------------------|------------|-----------------------------------------------------------------------------------------------------------------------------------------------------------------------------------------------------------------------------------------------------------------------------------------------------------------------------------------------------------------------------------------------------------------------------------------------------------------------------------------------------------------------------------------------------------------------------------------|
| Outcome Name In Study          | Outcome Measurement      | Text Box   | Outcomes measured, exactly as in study: Enter the exact wording of the health outcome used in the study. The outcome name as entered will appear in the output tables, so some longer names may be truncated by the data extractor if appropriate.                                                                                                                                                                                                                                                                                                                                      |
| Diagnostic Method              | Outcome Measurement      | Combo Box  | Method of autism assessment, general: Select the method of diagnosis determination. You may only enter one. If multiple diagnostic types were used, include that information in the diagnostic description field.                                                                                                                                                                                                                                                                                                                                                                       |
| Diagnostic Description         | Outcome Measurement      | Text Box   | Method of autism assessment, detailed: Use short phrases, all lower case, separated by semicolons. This may include more detail about the method used and conclusions about how reliable the method of diagnosis was compared with other available methods. Also, if ICD codes were used to as part of the outcome assessment, indicate the codes here. Example: "cancers determined through annual health exams, home visit interviews, household registration data checks, cancer registry, and death certification" "identified by review of death certificates with ICD 9 code 188" |
| Outcome Sampling Years         | Outcome Measurement      | Text Box   | Enter range of years when outcomes were assessed. Example: "1990-1991" "1976"                                                                                                                                                                                                                                                                                                                                                                                                                                                                                                           |
| ICD used                       | Outcome Measurement      | Combo Box  | Enter which version of the ICD codes was used. If the author originally used an older ICD list (e.g., ICD7) and converted to a newer list (e.g., ICD9), then enter the codes from the original list and note the conversion in the Diagnostic Description field. If ICD code not mentioned, choose not reported.                                                                                                                                                                                                                                                                        |
| Evaluation of Outcome Measure  | Outcome Measurement      | Text Box   | Number of subjects analyzed and number of missing participants: Include information about how many subjects were analyzed for each outcome and how many were missing. Also, enter any outcome information from related studies that may supplement the information from this main study.                                                                                                                                                                                                                                                                                                |
| Statistical Finding Selections | Confounding and Analysis | Combo Box  | Choose an existing statistical finding from the drop down or click Add New to begin a new Statistical Finding.                                                                                                                                                                                                                                                                                                                                                                                                                                                                          |

| Field                                                  | Tab                      | Field Type | Instructions                                                                                                                                                                                                                                                                                                                                                                                                                                                                                                                                                                                                                                                                                                                                                                                                                                                                                                                                                                                                                                                                                                                                                                                                                                                                                                                                                                                                                                                                                 |
|--------------------------------------------------------|--------------------------|------------|----------------------------------------------------------------------------------------------------------------------------------------------------------------------------------------------------------------------------------------------------------------------------------------------------------------------------------------------------------------------------------------------------------------------------------------------------------------------------------------------------------------------------------------------------------------------------------------------------------------------------------------------------------------------------------------------------------------------------------------------------------------------------------------------------------------------------------------------------------------------------------------------------------------------------------------------------------------------------------------------------------------------------------------------------------------------------------------------------------------------------------------------------------------------------------------------------------------------------------------------------------------------------------------------------------------------------------------------------------------------------------------------------------------------------------------------------------------------------------------------|
| Description of Population Matching                     | Confounding and Analysis | Text Box   | <p>This field should contain only information from the study, not an evaluation of matching. For most relevant study types, a control (or reference) population must be determined. This control population should have similar demographics to the exposed population. Describe how the control population and reference population demographic statistics were assessed to ensure the reference population demographics matched the exposed population demographics. Often the relevant demographics include sex, age, and ethnicity/race. For occupational studies, the occupation of the reference group is also important. For certain chemicals or for certain health outcomes, other demographics may be important, such as education status, smoking status, or others.</p> <p>Example: "A population consisting of a similar ethnic and age demographics in a neighboring region in China was selected for the control population. The paper provides information showing that age and sex were both similar in the two populations, although smoking status was not evaluated."</p> <p>Example: "The study made no mention of how matching was assessed, and no demographic information is provided separately by exposure group."</p> <p>Example: "The study made no mention of how matching was assessed, although the reference population was selected from amongst other United States steel-mill workers who likely had the same age profile as the exposed population."</p> |
| Confounding Considered in Study Design                 | Confounding and Analysis | Text Box   | <p>Were known confounders accounted for by study design?: List all confounders that were included in the study design. This is different than the confounders that were eventually included in the statistical analysis. These confounders are ones considered when choosing either the target population (the whole population considered for the study) or the study population (those that eventually participated in the study). Use short complete sentences. Example: "Smoking status was ascertained by survey and all smokers or those living in homes with smokers were excluded from the study population." This information may overlap somewhat with the exclusion criteria.</p>                                                                                                                                                                                                                                                                                                                                                                                                                                                                                                                                                                                                                                                                                                                                                                                                 |
| Adjustment factors considered in the analysis          | Confounding and Analysis | Memo       | <p>Were known confounders accounted for by the analysis, considered: Click the "Add Factors" link to enter confounders that were considered as part of the statistical analysis. This list might not include all the ones that were eventually included in the statistical model if some were found to have no effect on the results</p>                                                                                                                                                                                                                                                                                                                                                                                                                                                                                                                                                                                                                                                                                                                                                                                                                                                                                                                                                                                                                                                                                                                                                     |
| Adjustment factors included in the analysis            | Confounding and Analysis | Memo       | <p>Were known confounders accounted for by the analysis, included: Click the "Add Factors" link to enter confounders that were included in the statistical analysis. This list should only include those that were actually included in the ultimate statistical model. If a confounder is not on the list, type it in to add it.</p>                                                                                                                                                                                                                                                                                                                                                                                                                                                                                                                                                                                                                                                                                                                                                                                                                                                                                                                                                                                                                                                                                                                                                        |
| Reason for Excluding Adjustment Factors in Final Model | Confounding and Analysis | Text Box   | <p>If some of the confounders in the "considered" list did not make it into the final "included" list, enter a description of why they were excluded. Example: "Education status was considered as a potential confounder but did not significantly affect the model."</p>                                                                                                                                                                                                                                                                                                                                                                                                                                                                                                                                                                                                                                                                                                                                                                                                                                                                                                                                                                                                                                                                                                                                                                                                                   |



| Field                                               | Tab                      | Field Type | Instructions                                                                                                                                                                                                                                              |
|-----------------------------------------------------|--------------------------|------------|-----------------------------------------------------------------------------------------------------------------------------------------------------------------------------------------------------------------------------------------------------------|
| Source in Study                                     | Confounding and Analysis | Text Box   | Enter the location in the study where the statistical conclusion information can be found; Table X, Page Y in the study reference or section in text (section number/title, page number)                                                                  |
| Confounder                                          | Confounding and Analysis | Text Box   | Indicate which confounder was considered. Enter a new row for each confounder.                                                                                                                                                                            |
| Dichotomous/Continuous                              | Confounding and Analysis | Combo Box  | Indicate whether the confounder is dichotomous (categorical) or continuous.                                                                                                                                                                               |
| Included in Final Analysis                          | Confounding and Analysis | Check Box  | Indicate whether the current confounder was included in the analysis.                                                                                                                                                                                     |
| Description                                         | Confounding and Analysis | Text Box   | Enter any additional information regarding this confounder. For example, if the confounder is dichotomous how many levels are considered. If the confounder is continuous, indicate the evaluated range.                                                  |
| Other Comments on Confounding                       | Confounding and Analysis | Text Box   | Enter any additional comments on confounding (e.g., if the study is evaluating an occupational exposure, indicate any co-exposures that may have occurred.)                                                                                               |
| Evaluation of Confounding                           | Confounding and Analysis | Text Box   | Enter any additional confounding information from related studies that supplements the information from this main study.                                                                                                                                  |
| Description of Statistical Analysis                 | Confounding and Analysis | Text Box   | Enter information about the statistical method, including the type of regression or analysis (by name) that was used and any other information that might be pertinent to assessing the reliability of the statistical method.                            |
| Other Method Notes                                  | Confounding and Analysis | Text Box   | Enter any other information from the study (other than confounders, matching, outcome/exposure timing, missing data, coexposures, exposure assessment, and outcome assessment) that may introduce bias into the study and how the bias was accounted for. |
| Evaluation of Statistical and Analytical Approaches | Confounding and Analysis | Text Box   | Enter any additional statistical analysis and results information from related studies that supplements the information from this main study.                                                                                                             |
| Level                                               | Results                  | Text Box   |                                                                                                                                                                                                                                                           |
| Stat. Est.                                          | Results                  | Text Box   | Enter the numerical value for the statistical metric for the particular exposure level/group. For the reference group, the value will be either 1 or 0.                                                                                                   |
| Lower CI                                            | Results                  | Text Box   | Enter the lower end of the confidence interval.                                                                                                                                                                                                           |
| Upper CI                                            | Results                  | Text Box   | Enter the upper end of the confidence interval.                                                                                                                                                                                                           |
| CI Units                                            | Results                  | Combo Box  | Enter whether the confidence interval is the 95%, 90%, etc. Leave blank for reference group. Enter "NA" if not applicable.                                                                                                                                |
| # w/ Outcome                                        | Results                  | Text Box   | Number of people in exposure group with outcome; leave blank if not available. If the value is calculated or inferred from the study, put the value in square brackets.                                                                                   |
| # w/o Outcome                                       | Results                  | Text Box   | Number of people in exposure group without outcome; leave blank if not available. If the value is calculated or inferred from the study, put the value in square brackets.                                                                                |
| Total in Group                                      | Results                  | Text Box   | Enter total number of people in exposure group; leave blank if not available. If the value is calculated or inferred from the study, put the value in square brackets.                                                                                    |

| Field                | Tab                                  | Field Type                 | Instructions                                                                                                                                                                                                                                                            |
|----------------------|--------------------------------------|----------------------------|-------------------------------------------------------------------------------------------------------------------------------------------------------------------------------------------------------------------------------------------------------------------------|
| Prevalence/Incidence | Results                              | Text Box                   | Enter the prevalence or incidence as a percentage; leave blank if not available. If the value is calculated or inferred from the study, put the value in square brackets. After the value, enter (P) if the value is a prevalence and (I) if the value is an incidence. |
| Variance             | Results                              | Text Box                   | Enter the standard error or standard deviation for the statistical metric value, if given.                                                                                                                                                                              |
| Variance Type        | Results                              | Combo Box                  | Choose standard deviation or standard error to correspond to value entered in variance column.                                                                                                                                                                          |
| P Value Qualifier    | Results                              | Text Box                   | Select the appropriate qualifier that describes the p-value in the next field (" $<$ ", " $>$ ", etc.)                                                                                                                                                                  |
| P value              | Results                              | Text Box                   | If a test was done to determine whether the exposure group is statistically different from the control group (as opposed to an overall trend test across all groups), enter the p-value from the analysis here.                                                         |
| Notes                | Results                              | Memo                       | Miscellaneous comments by reviewer regarding data analysis: Use phrases separated by semicolons (;) to make note of any observations pertaining to a single exposure group.                                                                                             |
| Results              | Did author test for trend?           | Did author test for trend? | Indicate whether a test for trend was performed by the study authors.                                                                                                                                                                                                   |
| Results              | Trend Description                    | Trend Description          | Select whether the authors found a positive, negative, null, or unknown trend. A trend is positive if the statistical test indicates that exposure led to an increase in risk of a health outcome.                                                                      |
| Results              | Test Value Type                      | Test Value Type            | Select the type of metric provided for the trend test. If the selection is not on the list, add it.                                                                                                                                                                     |
| Results              | Test Value Modifier                  | Test Value Modifier        | Select the inequality symbol associated with the test value.                                                                                                                                                                                                            |
| Results              | Test Value                           | Test Value                 | Enter a p-value (or other statistic, if reported) for the author's trend test.                                                                                                                                                                                          |
| Results              | Is trend monotonic?                  | Is trend monotonic?        | Select if the trend is monotonic (consistently increasing or consistently decreasing) or non-monotonic (e.g., goes up with increasing exposure for low exposures and goes down with increasing exposure for high exposures).                                            |
| Results              | Author Conclusion on Trend           |                            | Enter a supporting description in the text box describing the authors' main conclusions about the health outcome for that exposure group. Use one or a few complete sentences. Example: "The authors conclude there is no evidence of a statistical relationship"       |
| Results              | Data Extractor Observations on Trend |                            | If the authors did not perform a trend test or provide conclusions on the trend, select the option that best describes the statistical results.                                                                                                                         |
| Results              | Data Extractors Comments on Trend    |                            | Note any of your own conclusions that are not necessarily reported by the author.                                                                                                                                                                                       |

**Table S4: Characteristics and risk of bias ratings of Adgent et al. (2014)**

| <b>Study Element</b> | <b>Description</b>                                                                                                                                                                                                                 |
|----------------------|------------------------------------------------------------------------------------------------------------------------------------------------------------------------------------------------------------------------------------|
| Design               | Prospective birth cohort                                                                                                                                                                                                           |
| Participants         | 184 mother-child pairs for intelligence outcomes and 192 mother-child pairs for ADHD and attention-related behavior outcomes from the Pregnancy, Infection, and Nutrition Babies Study in Central North Carolina between 2004-2006 |
| Exposure             | BDEs 28, 47, 99, 100, and 153 measured in breast milk three months postpartum                                                                                                                                                      |
| Comparator           | Children with lower levels of breast milk PBDE measurements (first quartile concentrations as referent)                                                                                                                            |
| Outcomes             | Mullen Scales of Early Learning (MSEL) composite score and Behavior Assessment System for Children (BASC)-2 (attention and hyperactivity subscales) assessed at 36 months                                                          |

| <b>Bias domain</b>               | <b>Authors' judgment</b> | <b>Support for judgment</b>                                                                                                                                                                                                                                                                                                     |
|----------------------------------|--------------------------|---------------------------------------------------------------------------------------------------------------------------------------------------------------------------------------------------------------------------------------------------------------------------------------------------------------------------------|
| Source population representation | Probably low             | No evidence for selection bias. Authors found no difference in exposure between those who did or did not complete full outcome assessment. The internal validity of this study is valid, since study authors were make conclusions for breastfeeding mothers and not the generalized population.                                |
| Blinding                         | Low                      | Outcome assessors not aware of exposure levels.                                                                                                                                                                                                                                                                                 |
| Exposure assessment              | Low                      | No concern about differential exposure assessment; thorough QA/QC reported in cited reference.                                                                                                                                                                                                                                  |
| Outcome assessment               | Low                      | No concern about differential outcome assessment or reliability.                                                                                                                                                                                                                                                                |
| Confounding                      | Probably high            | Analyses accounted for 5 of 10 Tier I important confounders: did not include marital status, maternal use of alcohol during pregnancy, maternal depression, gestational exposure to ETS, exposure to other neurotoxic agents. However, they did include breastfeeding duration, fatty acids in breastmilk, and maternal stress. |
| Incomplete outcome data          | Probably low             | Proportion of missing outcomes not different by exposure.                                                                                                                                                                                                                                                                       |
| Selective outcome reporting      | Low                      | All pre-specified outcomes reported.                                                                                                                                                                                                                                                                                            |
| Conflict of interest             | Low                      | Authors from universities, NIEHS or CDC and declared no COI; support from NIEHS, USEPA and CDC.                                                                                                                                                                                                                                 |
| Other sources of bias            | Low                      | No other potential sources of bias identified.                                                                                                                                                                                                                                                                                  |

**Table S5: Characteristics and risk of bias ratings of Chao et al. (2011)**

| <b>Study Element</b> | <b>Description</b>                                                                                                                                                                                                                                                                        |
|----------------------|-------------------------------------------------------------------------------------------------------------------------------------------------------------------------------------------------------------------------------------------------------------------------------------------|
| Design               | "Post hoc analysis of previous studies"—cohort study where data was re-analyzed subsequent to collection from a prospective birth cohort                                                                                                                                                  |
| Participants         | Mother-infant pairs recruited from 4 hospitals in Southern Taiwan, analyses based on 70 (exclusive or partial breast-feeding for first 6 months) between 2007-2010. Ding-Yan et al. 2010 (Chao et al. appears to be a later analysis including Ding-Yan cohort but with more recruitment) |
| Exposure             | BDEs 28, 47, 99, 100, 153, 154, 183, 196, 197, 203, 206, 207, 208, 209, and sum of all 14 measured in breast milk at birth                                                                                                                                                                |
| Comparator           | Children with lower levels of breast milk PBDE measurements (2-fold increase                                                                                                                                                                                                              |

|          |                                                                                                                     |
|----------|---------------------------------------------------------------------------------------------------------------------|
|          | comparison)                                                                                                         |
| Outcomes | Bayley Scales of Infant and Toddler Development (BSID)-III cognitive and language subscales assessed at 8-12 months |

| <b>Bias domain</b>               | <b>Authors' judgment</b> | <b>Support for judgment</b>                                                                                                                                                                                                                                                                                        |
|----------------------------------|--------------------------|--------------------------------------------------------------------------------------------------------------------------------------------------------------------------------------------------------------------------------------------------------------------------------------------------------------------|
| Source population representation | Probably high            | Exclusions of high number of participants and no analysis to show this selection bias did not impact the results.                                                                                                                                                                                                  |
| Blinding                         | Probably high            | There is insufficient information about blinding to permit a judgment of high risk of bias, but there is indirect evidence which suggests the study was not adequately blinded, as described by the criteria for a judgment of high risk of bias.                                                                  |
| Exposure assessment              | Probably low             | Non-standard method that doesn't appear validated in other studies--has been revised from a standard method.                                                                                                                                                                                                       |
| Outcome assessment               | Probably low             | No QA/QC described; No sensitivity analyses were conducted to suggest the influence of outcome misclassification would be minimal; there is no discussion as to whether the Bayley scale was culturally biased for this population.                                                                                |
| Confounding                      | Probably high            | The study controlled only for maternal age, pre-pregnancy BMI, sex, gestational age and age for testing Bayley scores.                                                                                                                                                                                             |
| Incomplete outcome data          | Low                      | The study does not directly address number of children who had both exposure and outcome data; while exposure is clearly documented for all 70 children included there is no corresponding descriptive presentation of the outcome data for all 70 children--presumably all 70 children included had outcome data. |
| Selective outcome reporting      | Low                      | The study outcome was Bayley scores and it was reported.                                                                                                                                                                                                                                                           |
| Conflict of interest             | Low                      | Supported by a grant (NSC96-2628-E-020-001-MY3) from the National Science Council, Taiwan. The authors report no conflicts of interest.                                                                                                                                                                            |
| Other sources of bias            | Low                      | No other potential sources of bias identified.                                                                                                                                                                                                                                                                     |

**Table S6: Characteristics and risk of bias ratings of Chen et al. (2014)**

| <b>Study Element</b> | <b>Description</b>                                                                                                                                                                                                                                                                                                                                                                                                  |
|----------------------|---------------------------------------------------------------------------------------------------------------------------------------------------------------------------------------------------------------------------------------------------------------------------------------------------------------------------------------------------------------------------------------------------------------------|
| Design               | Prospective birth cohort                                                                                                                                                                                                                                                                                                                                                                                            |
| Participants         | 179-285 mother-child pairs depending on age of assessment for intelligence outcomes and 165-240 mother-child pairs depending on age of assessment for ADHD and attention-related outcomes from Cincinnati Ohio enrolled between 2003-2006                                                                                                                                                                           |
| Exposure             | BDE 47 and sum of BDEs 47, 99, 100, 153 measured in maternal serum during week 16 of gestation                                                                                                                                                                                                                                                                                                                      |
| Comparator           | Children with lower levels of maternal serum PBDE measurements (10-fold increase comparison)                                                                                                                                                                                                                                                                                                                        |
| Outcomes             | Bayley Scales of Infant and Toddler Development (BSID)-II Mental Development Index (MDI) and Psychomotor Development Index (PDI) assessed at 12, 24, 36 months; Wechsler Preschool and Primary Scale of Intelligence (WPPSI)-III Full Scale Intelligence Quotient (FSIQ) assessed at 60 months. Behavior Assessment System for Children (BASC)-2 attention and hyperactivity subscales assessed at 2, 3, 4, 5 years |

| <b>Bias domain</b>               | <b>Authors' judgment</b> | <b>Support for judgment</b>                                                                                                                                                           |
|----------------------------------|--------------------------|---------------------------------------------------------------------------------------------------------------------------------------------------------------------------------------|
| Source population representation | Low                      | No evidence for selection bias. Authors found no difference in exposure between those who did or did not complete full outcome assessment.                                            |
| Blinding                         | Low                      | "...assessors conducted the neurobehavioral assessments without knowledge of maternal PBDE levels."                                                                                   |
| Exposure assessment              | Low                      | No concern about differential exposure assessment. CDC is "gold standard" method; LOD reported in cited reference; QA/QC blanks reported, although not quantified in this paper.      |
| Outcome assessment               | Low                      | No concern about differential outcome assessment or reliability.                                                                                                                      |
| Confounding                      | Probably low             | Analyses accounted for all Tier I important confounders except maternal use of alcohol during pregnancy.                                                                              |
| Incomplete outcome data          | Low                      | Demographic profile of participants tested at age 5 years is very similar to enrolled cohort, and were also similar in terms of PBDEs and Bayley scores at ages 1-3 years.            |
| Selective outcome reporting      | Low                      | Although there was one outcome (binary PDI<85) without results reported, there were many outcomes in this study and other measures of PDI (linear mixed model results) were included. |
| Conflict of interest             | Low                      | Authors from universities, hospitals or CDC and declared no COI; support from NIEHS and Passport Foundation.                                                                          |
| Other sources of bias            | Low                      | No other potential sources of bias identified.                                                                                                                                        |

**Table S7: Characteristics and risk of bias ratings of Cowell et al. (2015)**

| <b>Study Element</b> | <b>Description</b>                                                                                                                                                                                                                                                                             |
|----------------------|------------------------------------------------------------------------------------------------------------------------------------------------------------------------------------------------------------------------------------------------------------------------------------------------|
| Design               | Prospective birth cohort                                                                                                                                                                                                                                                                       |
| Participants         | 329 pregnant women who delivered singleton babies at 1 of 3 downtown New York hospitals in close proximity to the World Trade Center site between 2001-2002; 109 mother-child pairs evaluated for attention-related behavioral problems at age 4 and 107 mother-child pairs evaluated at age 6 |
| Exposure             | BDE 47, 85, 99, 100, 153, 154, 183 measured in cord blood at birth                                                                                                                                                                                                                             |
| Comparator           | Children with lower levels of cord blood PBDE measurements (3-fold increase comparison; also compared lowest 80% exposure category to highest 20%)                                                                                                                                             |
| Outcomes             | Child Behavior Checklist (CBCL) administered beginning at age 3 years annually through age 7 years                                                                                                                                                                                             |

| <b>Bias domain</b>               | <b>Authors' judgment</b> | <b>Support for judgment</b>                                                                                                                                                                                                                                                                                                                                                         |
|----------------------------------|--------------------------|-------------------------------------------------------------------------------------------------------------------------------------------------------------------------------------------------------------------------------------------------------------------------------------------------------------------------------------------------------------------------------------|
| Source population representation | Probably low             | Authors compare the subset of 210 participants with cord blood plasma PBDE measurements and the subsets of those with PBDE measurements and CBCL attention problem scores at age 4 (n=109) and 6 years (n=107). Authors reported two significant differences in the age of mothers and missing TONI-2 intelligence test scores.                                                     |
| Blinding                         | Low                      | Authors confirmed that all study investigators were blinded.                                                                                                                                                                                                                                                                                                                        |
| Exposure assessment              | Probably low             | Absence of quantitative information about standards recovery and repeatability, but information present on QA/QC.                                                                                                                                                                                                                                                                   |
| Outcome assessment               | Probably low             | Valid tests - no QA QC reported.                                                                                                                                                                                                                                                                                                                                                    |
| Confounding                      | Probably low             | Did not control for: home inventory, maternal use of alcohol during pregnancy, or maternal depression.                                                                                                                                                                                                                                                                              |
| Incomplete outcome data          | Probably high            | Concerns regarding missing outcome data at each follow-up time on almost half the cohort of 210 with cord blood PBDE measurements; no argument is presented that would invalidate the possibility of a selection bias (i.e., likelihood that outcome data is missing is related both to outcome status and exposure).                                                               |
| Selective outcome reporting      | Low                      | All of the study's pre-specified outcomes outlined in the protocol, methods, abstract, and/or introduction that are of interest in the review were reported in the pre-specified way.                                                                                                                                                                                               |
| Conflict of interest             | Low                      | This research was supported by the September 11th Fund of the New York Community Trust and United Way of New York City; the New York Times 9/11 Neediest Fund; the National Philanthropic Trust; National Institute of Environmental Health Sciences, and U.S. Environmental Protection Agency. The authors declare they have no actual or potential competing financial interests. |
| Other sources of bias            | Low                      | No other potential sources of bias identified.                                                                                                                                                                                                                                                                                                                                      |

**Table S8: Characteristics and risk of bias ratings of Gascon et al. (2011)**

| <b>Study Element</b> | <b>Description</b>                                                                                                                                                                                                                                                                                                             |
|----------------------|--------------------------------------------------------------------------------------------------------------------------------------------------------------------------------------------------------------------------------------------------------------------------------------------------------------------------------|
| Design               | Prospective birth cohort                                                                                                                                                                                                                                                                                                       |
| Participants         | Cord blood: 88 mother-child pairs for intelligence outcomes and 77 mother-child pairs for ADHD and attention-related behavioral outcomes, serum: 244 mother-child pairs for intelligence outcomes and 220 mother-child pairs for ADHD and attention-related behavioral outcomes from Menorca, Spain enrolled between 1997-1998 |
| Exposure             | BDE-47 measured in cord blood and in child serum at 4 years of age                                                                                                                                                                                                                                                             |
| Comparator           | Children with lower levels of cord blood or maternal serum PBDE measurements (below the LOQ as referent)                                                                                                                                                                                                                       |
| Outcomes             | McCarthy Scales of Children's Abilities (MSCA) total cognitive function score and Attention Deficit Hyperactivity Disorder (ADHD)- Diagnostic and Statistical Manual of Mental Disorders (DSM)-IV for attention deficit and hyperactivity assessed at 4 years                                                                  |

| <b>Bias domain</b>               | <b>Authors' judgment</b> | <b>Support for judgment</b>                                                                                                                                                                                                                                                                                           |
|----------------------------------|--------------------------|-----------------------------------------------------------------------------------------------------------------------------------------------------------------------------------------------------------------------------------------------------------------------------------------------------------------------|
| Source population representation | Probably low             | Details on inclusion/exclusion criteria for this study were lacking.                                                                                                                                                                                                                                                  |
| Blinding                         | Low                      | Exposure was quantified by a biological measure; ADHD was assessed by the teacher so it unlikely that the teacher had knowledge of exposure.                                                                                                                                                                          |
| Exposure assessment              | Low                      | The exposures were assessed using validated methods and at the same time for all participants; either from cord blood or serum levels at age 4.                                                                                                                                                                       |
| Outcome assessment               | Low                      | Teacher reports valid teachers are recognized as being excellent observers of children's neurodevelopment QA QC presented/discussed.                                                                                                                                                                                  |
| Confounding                      | Low                      | Study controlled for all important confounders listed in protocol.                                                                                                                                                                                                                                                    |
| Incomplete outcome data          | Low                      | Missing values were statistically imputed for a small proportion of samples (0.4%-5.2%).                                                                                                                                                                                                                              |
| Selective outcome reporting      | Low                      | ADHD results were pre-specified and reported as described in the methodology.                                                                                                                                                                                                                                         |
| Conflict of interest             | Low                      | This study was supported by Instituto de Salud Carlos III, Red de Grupos INMA and partially supported by the Fundació La Caixa, the Instituto de Salud Carlos III, Red de Centros RCESP.<br>The Guxens study (REF ID 3054) which describes the cohort also specifically states "Conflict of interest: None declared." |
| Other sources of bias            | Low                      | No other potential sources of bias identified.                                                                                                                                                                                                                                                                        |

**Table S9: Characteristics and risk of bias ratings of Gascon et al. (2012)**

| <b>Study Element</b> | <b>Description</b>                                                                                           |
|----------------------|--------------------------------------------------------------------------------------------------------------|
| Design               | Prospective birth cohort                                                                                     |
| Participants         | 290 mother-child pairs from Gipuzkoa, Basque Country and Sabadell Catalonia Spain between 2004-2008          |
| Exposure             | BDEs 47, 99, 100, 153, 154, 183, 209, and sum of all seven measured in breastmilk                            |
| Comparator           | Children born to women with lower levels of PBDE measurements in colostrum (10-fold increase comparison)     |
| Outcomes             | Bayley Scales of Infant and Toddler Development (BSID) mental and psychomotor score assessed at 12-18 months |

| <b>Bias domain</b>               | <b>Authors' judgment</b> | <b>Support for judgment</b>                                                                                                                                                                                                                                                                                                                                                                                                                                                                                                                                                                                                                                                                                                                                                                                                                                                              |
|----------------------------------|--------------------------|------------------------------------------------------------------------------------------------------------------------------------------------------------------------------------------------------------------------------------------------------------------------------------------------------------------------------------------------------------------------------------------------------------------------------------------------------------------------------------------------------------------------------------------------------------------------------------------------------------------------------------------------------------------------------------------------------------------------------------------------------------------------------------------------------------------------------------------------------------------------------------------|
| Source population representation | Low                      | The descriptions and/or data document potential for selection effects, however, adequate support was given indicating that potential selection effects were not differential across both exposure and outcome. There were significant differences between included/ excluded children related to outcome - there were no differences related to exposure.                                                                                                                                                                                                                                                                                                                                                                                                                                                                                                                                |
| Blinding                         | Low                      | It is not expected that the persons performing the laboratory analysis of the PBDEs would have knowledge of the neurological testing results. The paper states specifically that "Psychologists were not aware of any exposure information."                                                                                                                                                                                                                                                                                                                                                                                                                                                                                                                                                                                                                                             |
| Exposure assessment              | Low                      | Standard validated methods with QA/QC.                                                                                                                                                                                                                                                                                                                                                                                                                                                                                                                                                                                                                                                                                                                                                                                                                                                   |
| Outcome assessment               | Low                      | Children's cognitive and psychomotor development was assessed using the Bayley Scales of Infant Development (BSID). All testing was done in the health care center by one of the four specially trained psychologists in the presence of the mother. Psychologists were not aware of any exposure information. To limit interobserver variability, they applied a strict protocol, including training sessions where interobserver differences were quantified. Three sets of interobserver-reliability tests were conducted for each rater during fieldwork, and resulting intraclass correlations were 0.90 for the BSID mental scale. Cronbach's alpha coefficient, a measure of internal consistency, was 0.78 for the mental scale. Scores were standardized for child's age in days at test administration using a parametric method to estimate age-specific reference intervals. |
| Confounding                      | Probably low             | The study appropriately accounted for most but not all of the important confounders (Tier I), AND this is not expected to introduce substantial bias.                                                                                                                                                                                                                                                                                                                                                                                                                                                                                                                                                                                                                                                                                                                                    |
| Incomplete outcome data          | Low                      | Participants were followed long enough to obtain outcome measurements and missing data were imputed using appropriate methods.                                                                                                                                                                                                                                                                                                                                                                                                                                                                                                                                                                                                                                                                                                                                                           |
| Selective outcome reporting      | Low                      | The study's pre-specified outcome (neurodevelopment) outlined in the protocol, methods, abstract, and/or introduction that are of interest in the review have been reported in the pre-specified way (BSID scores).                                                                                                                                                                                                                                                                                                                                                                                                                                                                                                                                                                                                                                                                      |
| Conflict of interest             | Low                      | This study was funded by grants from Instituto de Salud Carlos, Spanish Ministry of Health, Generalitat de Catalunya-CIRIT, Department of Health of the Basque Government, the Provincial Government of Gipuzkoa, and Fundación Roger Torné. The authors declare they have no actual or potential competing interests.                                                                                                                                                                                                                                                                                                                                                                                                                                                                                                                                                                   |
| Other sources of bias            | Low                      | No other potential sources of bias identified.                                                                                                                                                                                                                                                                                                                                                                                                                                                                                                                                                                                                                                                                                                                                                                                                                                           |

**Table S10: Characteristics and risk of bias ratings of Gump et al. (2014)**

| <b>Study Element</b> | <b>Description</b>                                                       |
|----------------------|--------------------------------------------------------------------------|
| Design               | Cross sectional epidemiology study                                       |
| Participants         | 43 children from Oswego County New York ages 9-11 years at time of study |



|            |                                                                                                                        |
|------------|------------------------------------------------------------------------------------------------------------------------|
| Exposure   | BDEs 28, 47, 99, 100 measured in child whole blood approximately 1 week before testing (~ 10 years old)                |
| Comparator | Children with lower levels of blood PBDE measurements (across 1-unit increases)                                        |
| Outcomes   | Parental Strengths and Difficulties Questionnaire (SDQ) hyperactivity-inattention subscale assessed between 9-11 years |

| <b>Bias domain</b>               | <b>Authors' judgment</b> | <b>Support for judgment</b>                                                                                                                       |
|----------------------------------|--------------------------|---------------------------------------------------------------------------------------------------------------------------------------------------|
| Source population representation | Low                      | No data to support the assumption that the study sample did not differ, by exposure, from those not tested.                                       |
| Blinding                         | Low                      | Authors confirmed that all study investigators were blinded.                                                                                      |
| Exposure assessment              | Probably low             | There were some low standards recovery affecting confidence in methods, but this is not expected to impact study sample differentially.           |
| Outcome assessment               | Low                      | Based on expert input from day-long meeting re the assessment instruments (performance tasks and parent questionnaire).                           |
| Confounding                      | High                     | Only 3 of the important confounders accounted for.                                                                                                |
| Incomplete outcome data          | Low                      | No or only 1 missing data.                                                                                                                        |
| Selective outcome reporting      | Low                      | All pre-specified outcomes reported.                                                                                                              |
| Conflict of interest             | Low                      | No COI statement, but all authors and funding from academia.                                                                                      |
| Other sources of bias            | High                     | PBDE exposure was measured the week prior to assessing ADHD outcomes, raising concerns regarding whether the exposure truly preceded the outcome. |

**Table S11: Characteristics and risk of bias ratings of Eskenazi et al. (2013)**

| <b>Study Element</b> | <b>Description</b>                                                                                                                                                                                                                                                                                                                                                                                                                                                                                                                                                                                                                                                                                                                                                                                                                                                                                                                                                                                  |
|----------------------|-----------------------------------------------------------------------------------------------------------------------------------------------------------------------------------------------------------------------------------------------------------------------------------------------------------------------------------------------------------------------------------------------------------------------------------------------------------------------------------------------------------------------------------------------------------------------------------------------------------------------------------------------------------------------------------------------------------------------------------------------------------------------------------------------------------------------------------------------------------------------------------------------------------------------------------------------------------------------------------------------------|
| Design               | Prospective birth cohort                                                                                                                                                                                                                                                                                                                                                                                                                                                                                                                                                                                                                                                                                                                                                                                                                                                                                                                                                                            |
| Participants         | 231 to 256 (depending on intelligence outcome assessed) and 285-323 (depending on ADHD and attention-related behavioral outcomes assessed) mother-child pairs from Salinas Valley California enrolled in the CHAMACOS Study between 1999-2000                                                                                                                                                                                                                                                                                                                                                                                                                                                                                                                                                                                                                                                                                                                                                       |
| Exposure             | BDEs 17, 28, 47, 66, 85, 99, 100, 153, 154, 183, SUM of 47, 99, 100, 153, and sum of all ten measured in maternal prenatal (at pregnancy or during delivery) and child serum samples (at 7-year visit)                                                                                                                                                                                                                                                                                                                                                                                                                                                                                                                                                                                                                                                                                                                                                                                              |
| Comparator           | Children with lower levels of maternal prenatal or child PBDE measurements (10-fold increase comparison)                                                                                                                                                                                                                                                                                                                                                                                                                                                                                                                                                                                                                                                                                                                                                                                                                                                                                            |
| Outcomes             | Wechsler Preschool and Primary Scale of Intelligence (WPPSI)-III performance Intelligence Quotient (IQ) at 60 months, Wechsler Intelligence Scale for Children (WISC)-IV full scale IQ (FSIQ) at 72 months; Child Behavior Checklist (CBCL) attention problems, CBCL Attention Deficit Hyperactivity Disorder (ADHD), Kiddie Continuous Performance Test (K-CPT) errors of commission, K-CPT errors of omission, K-CPT ADHD Confidence Index assessed at 5 years; Conners' ADHD/DSM-IV Scales (CADS) maternal report ADHD index, Diagnostic and Statistical Manual of Mental Disorders (DSM)-IV total scale with inattentive and hyperactivity/impulsivity subscales, Behavior Assessment System for Children (BASC)-2 maternal report hyperactivity scale and attention problems scale, CADS teacher report ADHD index and DSM-IV total scale with inattentive and hyperactivity/impulsivity subscales, BASC-2 teacher report hyperactivity scale and attention problems scale assessed at 7 years |

| <b>Bias domain</b>               | <b>Authors' judgment</b> | <b>Support for judgment</b>                                                                                                                                                                                                |
|----------------------------------|--------------------------|----------------------------------------------------------------------------------------------------------------------------------------------------------------------------------------------------------------------------|
| Source population representation | Low                      | Despite cohort attrition they analyzed the data and show there are not important differences (i.e., parental PBDE levels, between source population and study population).                                                 |
| Blinding                         | Low                      | Authors confirmed that all study investigators were blinded.                                                                                                                                                               |
| Exposure assessment              | Low                      | Samples were analyzed at CDC using validated methods. Quality control samples (blanks and spikes) were included in each run.                                                                                               |
| Outcome assessment               | Low                      | Valid tests used and teacher report considered reliable - bilingual psychometrician did testing, and children were assessed in their dominant language. However, there is no discussion of QA/QC between psychometricians. |
| Confounding                      | Low                      | Analyses accounted for all Tier I important confounders.                                                                                                                                                                   |
| Incomplete outcome data          | Low                      | There is no discussion of missing outcome data; there is some but not a lot of missing data.                                                                                                                               |
| Selective outcome reporting      | Low                      | All pre-specified outcomes reported.                                                                                                                                                                                       |
| Conflict of interest             | Low                      | The authors declare they have no actual or potential competing financial interests.                                                                                                                                        |
| Other sources of bias            | Low                      | No other potential sources of bias identified.                                                                                                                                                                             |

**Table S12: Characteristics and risk of bias ratings of Herbstman et al. (2010)**

| <b>Study Element</b> | <b>Description</b>                                                                                                                                                                                                                                                                                                                            |
|----------------------|-----------------------------------------------------------------------------------------------------------------------------------------------------------------------------------------------------------------------------------------------------------------------------------------------------------------------------------------------|
| Design               | Prospective birth cohort                                                                                                                                                                                                                                                                                                                      |
| Participants         | 152 mother-child pairs who delivered babies at 1 of 3 downtown New York hospitals in close proximity to the World Trade Center after September 11, 2001                                                                                                                                                                                       |
| Exposure             | BDE 47, 99, 100, 153 measured in cord blood at birth                                                                                                                                                                                                                                                                                          |
| Comparator           | Children with lower levels of cord blood PBDE measurements (3-fold increase comparison; also first quartile concentrations as referent)                                                                                                                                                                                                       |
| Outcomes             | Bayley Scales of Infant and Toddler Development (BSID)-II Mental Development Index (MDI), BSID-II Psychomotor Development Index (PDI), and Wechsler Preschool and Primary Scale of Intelligence, Revised Edition (WPPSI-R) full scale intelligence quotient (FSIQ). BSID measured at 12, 24, and 36 months, WPPSI-R measured at 48, 72 months |

| <b>Bias domain</b>               | <b>Authors' judgment</b> | <b>Support for judgment</b>                                                                                                                                                                                                                                                                                                                                                                                                                                                                              |
|----------------------------------|--------------------------|----------------------------------------------------------------------------------------------------------------------------------------------------------------------------------------------------------------------------------------------------------------------------------------------------------------------------------------------------------------------------------------------------------------------------------------------------------------------------------------------------------|
| Source population representation | Probably low             | Although they compared the characteristics of the group of 152 for whom both cord blood measurements and "a neurodevelopmental test" were available, the numbers on which analyses at the different follow-up ages were conducted were less than 152 (118, 117, 114, 104, and 96 at 12, 24, 36, 48, and 72 months). No comparisons are presented of the characteristics of these subsamples compared to the full cohort of 329, the subset of 210 with cord blood measurements, of the subsample of 152. |
| Blinding                         | Low                      | Authors confirmed that all study investigators were blinded.                                                                                                                                                                                                                                                                                                                                                                                                                                             |
| Exposure assessment              | Probably low             | Absence of quantitative information about standards recovery and repeatability, but information present on QA/QC.                                                                                                                                                                                                                                                                                                                                                                                        |
| Outcome assessment               | Probably low             | Valid tests - no QA QC reported.                                                                                                                                                                                                                                                                                                                                                                                                                                                                         |
| Confounding                      | Probably low             | Did not control for: home inventory, maternal use of alcohol during pregnancy, or maternal depression.                                                                                                                                                                                                                                                                                                                                                                                                   |
| Incomplete outcome data          | Probably high            | Concerns regarding missing outcome data at each follow-up time on almost half the cohort of 210 with cord blood PBDE measurements; no argument is presented that would invalidate the possibility of a selection bias (i.e., likelihood that outcome data is missing is related both to outcome status and exposure).                                                                                                                                                                                    |
| Selective outcome reporting      | Low                      | All of the study's pre-specified outcomes outlined in the protocol, methods, abstract, and/or introduction that are of interest in the review were reported in the pre-specified way.                                                                                                                                                                                                                                                                                                                    |
| Conflict of interest             | Low                      | This research was supported by the September 11th Fund of the New York Community Trust and United Way of New York City; the New York Times 9/11 Neediest Fund; the National Philanthropic Trust; National Institute of Environmental Health Sciences, and U.S. Environmental Protection Agency. The authors declare they have no actual or potential competing financial interests.                                                                                                                      |
| Other sources of bias            | Low                      | No other potential sources of bias identified.                                                                                                                                                                                                                                                                                                                                                                                                                                                           |

**Table S13: Characteristics and risk of bias ratings of Hoffman et al. (2012)**

| <b>Study Element</b> | <b>Description</b>                                                                                                                      |
|----------------------|-----------------------------------------------------------------------------------------------------------------------------------------|
| Design               | Prospective birth cohort                                                                                                                |
| Participants         | 222 mother-child pairs in North Carolina in the Pregnancy, Infection, and Nutrition Babies Study enrolled between 2001-2005             |
| Exposure             | BDEs 28, 47, 99, 100, 153, and sum of five measured in breastmilk three months postpartum                                               |
| Comparator           | Children with lower levels of breast milk PBDE measurements (below the median concentrations as referent)                               |
| Outcomes             | Infant-Toddler Social and Emotional Assessment (ITSEA)-activity/impulsivity and attention regulation subscales measured at 24-36 months |

| <b>Bias domain</b>               | <b>Authors' judgment</b> | <b>Support for judgment</b>                                                                                                                                                                                                                                                                                                                                                                                                                                             |
|----------------------------------|--------------------------|-------------------------------------------------------------------------------------------------------------------------------------------------------------------------------------------------------------------------------------------------------------------------------------------------------------------------------------------------------------------------------------------------------------------------------------------------------------------------|
| Source population representation | Low                      | The descriptions and/or data as indicated the potential for selection effects and there was no support indicating that potential selection effects were not differential across both exposure and outcome, however, selection factors appeared to be well-understood, were measured in the data set, and appropriate adjustment post hoc techniques were used to control for selection bias.                                                                            |
| Blinding                         | Low                      | The authors report that mothers were not aware of the levels of PBDEs in their breast milk at the time the ITSEA was completed. They also report that study staff was not aware of a child's ITSEA scores or PBDE exposures through breast milk at the time the HOME was administered. It is assumed that the lab did not have access to the neurological testing results.                                                                                              |
| Exposure assessment              | Low                      | Breast milk samples were obtained and analyzed for PBDEs using validated methods with QA/QC.                                                                                                                                                                                                                                                                                                                                                                            |
| Outcome assessment               | Probably low             | Mothers completed the Infant-Toddler Social and Emotional Assessment (ITSEA), of their child between 24 and 36 months of age.                                                                                                                                                                                                                                                                                                                                           |
| Confounding                      | Probably low             | With the exception of "exposure to other neurotoxic agents," the study accounted for all of the Tier 1 confounders or reported why a Tier 1 confounder was evaluated but omitted (i.e., HOME Inventory). It seems like a significant shortcoming that measurement of lead was not conducted.                                                                                                                                                                            |
| Incomplete outcome data          | Low                      | The following missing data were reported: missing tobacco use during pregnancy n = 2; missing breast-feeding duration n = 4; missing social-emotional competency n = 1.                                                                                                                                                                                                                                                                                                 |
| Selective outcome reporting      | Low                      | All of the study's pre-specified outcomes outlined in the protocol, methods, abstract, and/or introduction that are of interest in the review were reported in the pre-specified way.                                                                                                                                                                                                                                                                                   |
| Conflict of interest             | Low                      | This research was supported by grants from the U.S. Environmental Protection Agency and the National Institute of Environmental Health Sciences. The work of K.H. was supported by the NIEHS Environmental Biostatistics Training Program. The work of M.A. on this project was supported [in part] by the Intramural Research Program of the National Institutes of Health, NIEHS. The authors declare they have no actual or potential competing financial interests. |
| Other sources of bias            | Low                      | No other potential sources of bias identified                                                                                                                                                                                                                                                                                                                                                                                                                           |

**Table S14: Characteristics and risk of bias ratings of Lin et al. (2010)**

| <b>Study Element</b> | <b>Description</b>                                                                                                                                                                                                                                                                                 |
|----------------------|----------------------------------------------------------------------------------------------------------------------------------------------------------------------------------------------------------------------------------------------------------------------------------------------------|
| Design               | Prospective birth cohort                                                                                                                                                                                                                                                                           |
| Participants         | Mother-infant pairs (n=35) recruited from 4 hospitals in Southern Taiwan, analyses based on 35 (exclusive or partial breast-feeding for first 6 months) enrolled between 2007-2008. Related to Chao et al. 2011 (Ding-Yan appears to be an early subset of Chao et al, presented for a conference) |
| Exposure             | BDEs 47, 99, 100, 153, 154, 196, 197, 206, 207, 208, 209, and sum of all eleven,                                                                                                                                                                                                                   |

|            |                                                                                                                          |
|------------|--------------------------------------------------------------------------------------------------------------------------|
|            | measured in breast milk                                                                                                  |
| Comparator | Children with lower levels of breast milk PBDE measurements (across 1-unit increases)                                    |
| Outcomes   | Bayley Scales of Infant and Toddler Development (BSID)-III with cognitive and language subscales assessed at 8-13 months |

| <b>Bias domain</b>               | <b>Authors' judgment</b> | <b>Support for judgment</b>                                                                                                                                                                                                                                                                                                                                                                                                               |
|----------------------------------|--------------------------|-------------------------------------------------------------------------------------------------------------------------------------------------------------------------------------------------------------------------------------------------------------------------------------------------------------------------------------------------------------------------------------------------------------------------------------------|
| Source population representation | Probably high            | As previously noted there is no evidence presented in paper as to whether there was/was not selection bias from the source population.                                                                                                                                                                                                                                                                                                    |
| Blinding                         | Probably high            | There is insufficient information about blinding to permit a judgment of high risk of bias, but there is indirect evidence which suggests the study was not adequately blinded, as described by the criteria for a judgment of high risk of bias.                                                                                                                                                                                         |
| Exposure assessment              | Low                      | The paper references Koh et al 2010 - the method cited was a revision of a standard method with much detail provided. QA/QC addressed.                                                                                                                                                                                                                                                                                                    |
| Outcome assessment               | Probably high            | Outcomes were assessed and defined consistently across all study participants, using a valid and reliable measures - the Bayley Scales of Infant and Toddler Development, Third Edition but there was no QA/QC described; No sensitivity analyses were conducted to suggest the influence of outcome misclassification would be minimal; there is no discussion as to whether the Bayley scale was culturally biased for this population. |
| Confounding                      | Probably high            | The study controlled only for maternal age, pre-pregnancy BMI, sex, gestational age and age for testing Bayley scores.                                                                                                                                                                                                                                                                                                                    |
| Incomplete outcome data          | Probably low             | No report of missing data; study reports total number of children with outcome/exposure measurements but no mention of any attrition over the course of study.                                                                                                                                                                                                                                                                            |
| Selective outcome reporting      | High                     | Missing results reported in the study; not all of the adjusted ORs are reported for the primary outcome.                                                                                                                                                                                                                                                                                                                                  |
| Conflict of interest             | Low                      | Funding for study came from Taiwan National Science Foundation, although authors have no declaration of whether they have other conflicts of interest.                                                                                                                                                                                                                                                                                    |
| Other sources of bias            | Low                      | No other potential sources of bias identified.                                                                                                                                                                                                                                                                                                                                                                                            |

**Table S15: Characteristics and risk of bias ratings of Roze et al. (2009)**

| <b>Study Element</b> | <b>Description</b>                                                                                                                                                                                                                           |
|----------------------|----------------------------------------------------------------------------------------------------------------------------------------------------------------------------------------------------------------------------------------------|
| Design               | Prospective birth cohort                                                                                                                                                                                                                     |
| Participants         | 62 mother-child pairs from northern provinces of Netherlands enrolled between 2001-2002                                                                                                                                                      |
| Exposure             | BDEs 47, 99, 100, 153, 154 measured in maternal blood during 35 <sup>th</sup> week of pregnancy                                                                                                                                              |
| Comparator           | Children with lower levels of maternal blood PBDE measurements (across 1-unit increases)                                                                                                                                                     |
| Outcomes             | Child Behavior Checklist (CBCL) internalizing and externalizing problems subscale and parental Attention Deficit Hyperactivity Disorder (ADHD) questionnaire with items on sustained attention and selective attention assessed at 5-6 years |

| <b>Bias domain</b>               | <b>Authors' judgment</b> | <b>Support for judgment</b>                                                                                                                                                                                                                                                                                                               |
|----------------------------------|--------------------------|-------------------------------------------------------------------------------------------------------------------------------------------------------------------------------------------------------------------------------------------------------------------------------------------------------------------------------------------|
| Source population representation | Low                      | There were 90 women in the cohort - do not know how many women were asked to participate and how many refused; of the 90 women, they were able to analyze 69 samples (due to cost limitations) and they chose the 69 randomly but did not state the method of randomization.                                                              |
| Blinding                         | Probably high            | No discussion in paper to indicate that the outcome assessment was made by a study investigator that was blinded to the exposure assessment.                                                                                                                                                                                              |
| Exposure assessment              | Low                      | The exposures were assessed at the same time in pregnancy for all participants using validated methods; blank samples to correct for background exposures; LOD were reported; internal and external standards were used; recovery rates were reported; QC was reported with inter-laboratory QC done by 3 labs using pooled blood sample. |
| Outcome assessment               | Probably low             | Valid test, no QA QC reported.                                                                                                                                                                                                                                                                                                            |
| Confounding                      | Probably high            | Did not account for most of the Tier 1 confounders.                                                                                                                                                                                                                                                                                       |
| Incomplete outcome data          | High                     | Only reporting on statistically significant findings.                                                                                                                                                                                                                                                                                     |
| Selective outcome reporting      | Low                      | All of the study's pre-specified (primary and secondary) outcomes – i.e., Motor, cognitive and behavioral, outlined in the protocol, methods, abstract, and/or introduction that are of interest in the review have been reported in the pre-specified way.                                                                               |
| Conflict of interest             | Low                      | Financial support was given to the project "COMPARE" by the European commission RD. The 2008 Meijer paper with the exposure data were also funded by the EU Commission R&D - The authors declare they have no competing financial interests.                                                                                              |
| Other sources of bias            | Low                      | No other potential sources of bias identified.                                                                                                                                                                                                                                                                                            |

**Table S16: Characteristics and risk of bias ratings of Sagiv et al. (2015)**

| <b>Study Element</b> | <b>Description</b>                                                                                                                                                                                                                                                                                                                                                                                                                        |
|----------------------|-------------------------------------------------------------------------------------------------------------------------------------------------------------------------------------------------------------------------------------------------------------------------------------------------------------------------------------------------------------------------------------------------------------------------------------------|
| Design               | Prospective birth cohort                                                                                                                                                                                                                                                                                                                                                                                                                  |
| Participants         | 622 mother-child pairs from Salinas Valley California in the CHAMACOS Study of children born between 2000-2002, recruited in two waves (when mother was pregnant during 1999-2000 or during expansion efforts in 2009-2011)                                                                                                                                                                                                               |
| Exposure             | BDEs 17, 28, 47, 66, 85, 99, 100, 153, 154, 183, SUM of 47, 99, 100, 153, and sum of all ten measured in maternal prenatal (at pregnancy or during delivery) and child serum samples (at 9-year visit)                                                                                                                                                                                                                                    |
| Comparator           | Children with lower levels of maternal prenatal or child PBDE measurements (10-fold increase comparison)                                                                                                                                                                                                                                                                                                                                  |
| Outcomes             | Neurobehavioral assessments (Conners' Continuous Performance Test (CPT)-II, Wechsler Intelligence for Children Fourth Edition (WISC-IV), Conners' Attention Deficit Hyperactivity Disorder (ADHD)/ Diagnostic and Statistical Manual of Mental Disorders (DSM)-IV Scales, Parent Versions (CADS-P), and Behavioral Assessment System for Children, 2 <sup>nd</sup> Edition Parent Report (BASC-2) completed at ages 9, 10.5, and 12 years |

| <b>Bias domain</b>               | <b>Authors' judgment</b> | <b>Support for judgment</b>                                                                                                                                                                                                |
|----------------------------------|--------------------------|----------------------------------------------------------------------------------------------------------------------------------------------------------------------------------------------------------------------------|
| Source population representation | Low                      | Despite cohort attrition they analyzed the data and show there are not important differences(i.e., parental PBDE levels, between source population and study population).                                                  |
| Blinding                         | Low                      | Authors confirmed that all study investigators were blinded.                                                                                                                                                               |
| Exposure assessment              | Low                      | Samples were analyzed at CDC using validated methods. Quality control samples (blanks and spikes) were included in each run.                                                                                               |
| Outcome assessment               | Low                      | Valid tests used and teacher report considered reliable - bilingual psychometrician did testing, and children were assessed in their dominant language. However, there is no discussion of QA/QC between psychometricians. |
| Confounding                      | Low                      | Analyses accounted for all Tier I important confounders.                                                                                                                                                                   |
| Incomplete outcome data          | Low                      | There is no discussion of missing outcome data; there is some but not a lot of missing data.                                                                                                                               |
| Selective outcome reporting      | Low                      | All pre-specified outcomes reported.                                                                                                                                                                                       |
| Conflict of interest             | Low                      | The authors declare they have no actual or potential competing financial interests.                                                                                                                                        |
| Other sources of bias            | Low                      | No other potential sources of bias identified.                                                                                                                                                                             |

**Table S17: Characteristics and risk of bias ratings of Shy et al. (2011)**

| <b>Study Element</b> | <b>Description</b>                                                                                                                                                                                 |
|----------------------|----------------------------------------------------------------------------------------------------------------------------------------------------------------------------------------------------|
| Design               | Prospective birth cohort                                                                                                                                                                           |
| Participants         | Randomly recruited from 4 hospitals in southern Taiwan, 36 infants included in analyses between 2007-2008. Possibly same cohort as Chao et al. or at the very least similar recruitment processes. |
| Exposure             | BDEs 15, 28, 47, 49, 99, 100, 153, 154, 183, 196, 197, and sum of eleven measured in cord blood at birth                                                                                           |
| Comparator           | Children with lower levels of cord blood PBDE measurements (below the median concentrations as referent)                                                                                           |
| Outcomes             | Bayley Scales of Infant and Toddler Development (BSID)-III cognitive and language subscales assessed at 8-12 months                                                                                |

| <b>Bias domain</b>               | <b>Authors' judgment</b> | <b>Support for judgment</b>                                                                                                                                                                                                                       |
|----------------------------------|--------------------------|---------------------------------------------------------------------------------------------------------------------------------------------------------------------------------------------------------------------------------------------------|
| Source population representation | Probably high            | Progressive reduction in the numbers at each stage (160 to 95 to 80 to 54 to 36)-- the 36 on which analyses are based are not very representative of the 160 invited to participate.                                                              |
| Blinding                         | Probably high            | There is insufficient information about blinding to permit a judgment of high risk of bias, but there is indirect evidence which suggests the study was not adequately blinded, as described by the criteria for a judgment of high risk of bias. |
| Exposure assessment              | Low                      | The exposures were assessed at the same time (at birth) all participants using validated methods; The methods are referenced in Lin et al 2011 which describe a validated method and QA/QC.                                                       |
| Outcome assessment               | Probably high            | No information presented about the training of the individuals who administered the Bayley Scales. No discussion regarding training or ongoing QA/QC (e.g., inter-examiner reliability; intra-examiner reliability over time, etc.).              |
| Confounding                      | Probably high<br>Low     | The study controlled only for maternal age, pre-pregnancy BMI, and parity.                                                                                                                                                                        |
| Incomplete outcome data          | Low                      | Outcome reporting was complete for all 36 samples.                                                                                                                                                                                                |
| Selective outcome reporting      | Low                      | Bayley Scales of Infant and Toddler Development results were pre-specified and reported as described in the methodology.                                                                                                                          |
| Conflict of interest             | Low                      | This work was supported by grants from the National Science Council and the National Health Research Institutes in Taiwan. The authors declare that there are no conflicts of interest.                                                           |
| Other sources of bias            | Low                      | No other potential sources of bias identified.                                                                                                                                                                                                    |

**Table S18: Characteristics and risk of bias ratings of Zhang et al. (2016)**

| <b>Study Element</b> | <b>Description</b>                                                                                                                                                                                     |
|----------------------|--------------------------------------------------------------------------------------------------------------------------------------------------------------------------------------------------------|
| Design               | Prospective birth cohort                                                                                                                                                                               |
| Participants         | 231 mother-child pairs from Cincinnati Ohio enrolled between 2003-2006                                                                                                                                 |
| Exposure             | Ten PBDE congeners (BDE-17, -28, -47, -66, -85, -99, -100, -153, -154, -183) measured in maternal serum during week 16 of gestation                                                                    |
| Comparator           | Children with lower levels of maternal serum PBDE measurements (10-fold increase comparison)                                                                                                           |
| Outcomes             | Wechsler Intelligence Scale for Children-IV (WISC-IV) full scale intelligence quotient (FSIQ); Behavioral Assessment System for Children (BASC)-2 Externalizing Problems score assessed at age 8 years |



| <b>Bias domain</b>               | <b>Authors' judgment</b> | <b>Support for judgment</b>                                                                                                                                                                                                     |
|----------------------------------|--------------------------|---------------------------------------------------------------------------------------------------------------------------------------------------------------------------------------------------------------------------------|
| Source population representation | Low                      | No evidence for selection bias. Authors found no difference in exposure between those who did or did not complete full outcome assessment.                                                                                      |
| Blinding                         | Low                      | "The assessors conducted the neurobehavioral assessments without knowledge of maternal serum PBDE and PCB concentrations."                                                                                                      |
| Exposure assessment              | Low                      | No concern about differential exposure assessment. CDC is "gold standard" method; LOD reported in cited reference; QA/QC blanks reported, although not quantified in this paper.                                                |
| Outcome assessment               | Low                      | No concern about differential outcome assessment or reliability.                                                                                                                                                                |
| Confounding                      | Probably low             | Analyses accounted for all Tier I important confounders except maternal use of alcohol during pregnancy.                                                                                                                        |
| Incomplete outcome data          | Low                      | Authors state that there was no significant difference in PBDE concentrations measured during pregnancy or demographic characteristics between the subjects included in their analysis and those not included (data not shown). |
| Selective outcome reporting      | Low                      | Reading skills, IQ, and externalizing problem results were pre-specified and reported as described in the methodology.                                                                                                          |
| Conflict of interest             | Low                      | Authors from universities, hospitals or CDC and declared no COI; support from NIEHS US EPA. Competing financial interest declaration revealed no activities directly related to present study.                                  |
| Other sources of bias            | Low                      | No other potential sources of bias identified.                                                                                                                                                                                  |

## List of excluded studies (n=1788)

- (0490). "Voluntary submissions from great lakes chemical corporation regarding brominated flame retardants with memo dated 041890." Epa/Ots: 0490-0756.
- (1000). "[TBBP-A (tetrabromobisphenol A), a brominated flame retardant]." WWF Belgium, Boulevard Emile Jacqmain 90(4).
- (1987). "NTP Toxicology and Carcinogenesis Studies of Tetrakis(hydroxymethyl)phosphonium sulfate (THPS) (CAS No. 55566-30-8) and Tetrakis(hydroxymethyl)phosphonium chloride (THPC) (CAS No. 124-64-1) in F344/N Rats and B6C3F1 Mice (Gavage Studies)." Natl Toxicol Program Tech Rep Ser 296: 1-290.
- (1990). "Environmental health criteria 110. Tricresyl phosphate." Environmental Health Criteria(110): 1-121.
- (1994). "NTP Toxicology and Carcinogenesis Studies of Tricresyl Phosphate (CAS No. 1330-78-5) in F344/N Rats and B6C3F1 Mice (Gavage and Feed Studies)." Natl Toxicol Program Tech Rep Ser 433: 1-321.
- (1997). "Position paper of the American Council on Science and Health: public health concerns about environmental polychlorinated biphenyls (PCBs)." Ecotoxicol Environ Saf 38(2): 71-84.
- (1998). Environmental health criteria: ix-201.
- (2000). "Product and data information on decabromodiphenyl oxide, octabromodiphenyl oxide and pentabromodiphenyl oxide with attachments." Epa/Ots 8227036: #44-8227036.
- (2011). Project 1: Developmental neurotoxicants: sensitization, consequences and mechanis. RePORTER Database National Institutes of Health.
- (2011). Project 2: Thyroid Metabolism Disruption Key in Toxicant-Induced Developmental Im. RePORTER Database National Institutes of Health.
- (2011). Research Support Core: Core B: Analytical Chemistry. RePORTER Database National Institutes of Health.
- (2012). "Canadian Society for Epidemiology and Biostatistics 2012 National Student Conference." American Journal of Epidemiology 176(1).
- (2013). "6th International Conference on Environmental Health Science." Toxicology and Environmental Health Sciences 5: S80.
- (2015). "HOME Study (Health Outcomes and Measures of the Environment Study)."

Abdallah, A. H. and D. M. Roby (1975). "Antagonism of depressant activity of ethanol by DH-524; a comparative study with Bemegride, Doxapram and d-amphetamine." *Proc Soc Exp Biol Med* 148(3): 819-822.

Abdelouahab, N., et al. (2013). "Maternal and cord-blood thyroid hormone levels and exposure to polybrominated diphenyl ethers and polychlorinated biphenyls during early pregnancy." *Am J Epidemiol* 178(5): 701-713.

Abolaji, A. O., et al. (2014). "Involvement of oxidative stress in 4-vinylcyclohexene-induced toxicity in *Drosophila melanogaster*." *Free Radic Biol Med* 71: 99-108.

Abou-Donia, M. B. (1985). "Biochemical Toxicology of Organophosphorous Compounds." *Neurotoxicology*, K. Blum and L. Manzo, Editors 00823: 423-444.

Abou-Donia, M. B. (1985). Mechanisms of occupational neuropathies. RePORTER Database National Institutes of Health.

Abou-Donia, M. B. (1986). Mechanisms of occupational neuropathies. RePORTER Database National Institutes of Health.

Abou-Donia, M. B. (1988). Mechanisms of occupational neuropathies. RePORTER Database National Institutes of Health.

Abou-Donia, M. B. (1989). Mechanisms of occupational neuropathies. RePORTER Database National Institutes of Health.

Abou-Donia, M. B. (1990). Mechanisms of occupational neuropathies. RePORTER Database National Institutes of Health.

Abou-Donia, M. B. (1991). Mechanisms of occupational neuropathies. RePORTER Database National Institutes of Health.

Achterberg, E. J., et al. (2014). Glucocorticoid receptor antagonism disrupts the reconsolidation of social reward-related memories in rats. *Behav Pharmacol.* 25: 216-225. [Behavioural pharmacology].

Adabor, E. S., et al. (2015). "SAGA: A hybrid search algorithm for Bayesian Network structure learning of transcriptional regulatory networks." *J Biomed Inform* 53: 27-35.

Adamkiewicz, G., et al. (2013). Ethical and Legal Challenges in Communicating Individual Biomonitoring and Person. RePORTER Database National Institutes of Health.

Adams, J. (1980). "THE FEEDING BEHAVIOR OF BDELLOCEPHALA-PUNCTATA A FRESH WATER TRICLAD." *Oikos* 35(1): 2-7.

Adams, J. (1980). "THE ROLE OF COMPETITION IN THE POPULATION DYNAMICS OF A FRESH WATER FLATWORM BDELLOCEPHALA-PUNCTATA TURBELLARIA TRICLADIDA." *Journal of Animal Ecology* 49(2): 565-580.

Adams, J. (1981). "SEROLOGICAL ANALYSIS OF THE DIET OF BDELLOCEPHALA-PUNCTATA A FRESH WATER TRICLAD." *Oikos* 36(1): 99-106.

Aderhold, A., et al. (2012). "Hierarchical Bayesian models in ecology: Reconstructing species interaction networks from non-homogeneous species abundance data." *Ecological Informatics* 11(Sp. Iss. SI): 55-64.

Adetona, O., et al. (2013). "Concentrations of select persistent organic pollutants across pregnancy trimesters in maternal and in cord serum in Trujillo, Peru." *Chemosphere* 91(10): 1426-1433.

Aga, D. S. and J. R. Olson (2012). Bioactivation of PBDEs by Human Cytochrome P-450. RePORTER Database National Institutes of Health.

Aga, D. S. and J. R. Olson (2013). Bioactivation of PBDEs by Human Cytochrome P-450. RePORTER Database National Institutes of Health.

Ahearn, A. (2011). "The San Antonio Statement, with Ake Bergman." *Environ Health Perspect* 119(1): doi:10.1289/ehp.trp010111.

Ahmed, A. E., et al. (1993). "Whole-body autoradiographic disposition, elimination and placental transport of [14C]tri-o-cresyl phosphate in mice." *J Appl Toxicol* 13(4): 259-267.

Ahn, K. C., et al. (2006). "Immunological assay for BDE-47 (2,2',4,4'-tetrabromodiphenyl ether) in biological samples." *Abstracts of Papers American Chemical Society* 232: 540.

Ahn, K. C., et al. (2009). Immunoassay for monitoring environmental and human exposure to the polybrominated diphenyl ether BDE-47. *Environ Sci Technol.* 43: 7784-7790. [Environmental science & technology].

Ahrens, V. D., et al. (1978). "A Water-Extractable Toxic Compound in Vinyl Upholstery Fabric." *Bulletin of Environmental Contamination and Toxicology* 20(3): 418-422.

Aiyer, M. S. and G. Fink (1974). "The role of sex steroid hormones in modulating the responsiveness of the anterior pituitary gland to luteinizing hormone releasing factor in the female rat." *J Endocrinol* 62(3): 553-572.

Akgul, O., et al. (2014). "X-Ray, Thermal, FT-IR and morphological studies of zinc borate in presence of boric acid synthesized by ulexite." *Periodico Di Mineralogia* 83(1): 77-88.

Akutsu, K. and S. Hori (2004). "[Polybrominated diphenyl ether flame retardants in foodstuffs and human milk]." *Shokuhin Eiseigaku Zasshi* 45(4): 175-183.

Alberti, G. (1974). "MATING BEHAVIOR AND GENITAL SYSTEM OF SNOUT MITES ACARINA BDELLIDAE TROMBIDIFORMES." *Zeitschrift fuer Morphologie der Tiere* 78(1-2): 111-157.

Alberti, G. and R. Ehrnsberger (1977). "STUDY ON THE SPINNING ABILITY OF BDELLIDAE AND CUNAXIDAE ACARI PROSTIGMATA BY SCANNING ELECTRONIC MICROSCOPY." *Acarologia (Paris)* 19(1): 55-61.

Albertini, R., et al. (2006). "The use of biomonitoring data in exposure and human health risk assessments." *Environmental Health Perspectives* 114(11): 1755-1762.

Alcock, R. E., et al. (2011). "Understanding the mismatch between the demands of risk assessment and practice of scientists - The case of Deca-BDE." *Environment International* 37(1): 216-225.

Alcock, R. E., et al. (2003). "Understanding levels and trends of BDE-47 in the UK and North America: An assessment of principal reservoirs and source inputs." *Environment International* 29(6): 691-698.

Alexandrov, K., et al. (1996). "Evidence of anti-benzo(a)pyrene diolepoxide-DNA adduct formation in human colon mucosa." *Carcinogenesis (Oxford)* 17(9): 2081-2083.

Allee-Smith, P. J., et al. (2013). "Barkley deficits in executive functioning scale (BDEFS)." *Journal of Psychoeducational Assessment* 31(1): 80-83.

Allen, J. (2009). *Complementary and Alternative Medicine Detoxification: Safety and Efficacy*. RePORTER Database National Institutes of Health.

Allen, J. (2010). *Complementary and Alternative Medicine Detoxification: Safety and Efficacy*. RePORTER Database National Institutes of Health.

Allen, J. (2011). *Complementary and Alternative Medicine Detoxification: Safety and Efficacy*. RePORTER Database National Institutes of Health.

Allen, J. (2012). *Complementary and Alternative Medicine Detoxification: Safety and Efficacy*. RePORTER Database National Institutes of Health.

Allen, J. (2013). *Complementary and Alternative Medicine Detoxification: Safety and Efficacy*. RePORTER Database National Institutes of Health.

Alm, H., et al. (2008). "Exposure to brominated flame retardant PBDE-99 affects cytoskeletal protein expression in the neonatal mouse cerebral cortex." *Neurotoxicology* 29(4): 628-637.

Alm, H. and B. Scholz (2010). *Developmental Neurotoxicity of PBDEs, Mechanisms and Implications*. Hauppauge, Nova Science Publishers, Inc.

Alm, H. and B. Scholz (2010). "DEVELOPMENTAL NEUROTOXICITY OF PBDES: MECHANISMS AND IMPLICATIONS." *Flame Retardants: Functions, Properties and Safety*: 1-39.

Alm, H. and B. Scholz (2010). *IN VITRO MECHANISMS OF PBDE NEUROTOXICITY*. Hauppauge, Nova Science Publishers, Inc.

Alm, H. and B. Scholz (2010). *IN VIVO MECHANISMS OF PBDE NEUROTOXICITY*. Hauppauge, Nova Science Publishers, Inc.

Alm, H. and B. Scholz (2010). *PBDE EXPOSURE AND GENERAL NEUROTOXICITY*. Hauppauge, Nova Science Publishers, Inc.

Alm, H., et al. (2004). "Proteomic evaluation of neonatal administration of environmental neurotoxicant." *Drug Metabolism Reviews* 36(Suppl. 1): 155.

Alm, H., et al. (2006). "Proteomic evaluation of neonatal exposure to 2,2',4,4',5-pentabromodiphenyl ether." *Environ Health Perspect* 114(2): 254-259.

Alm, H., et al. (2006). "Proteomic evaluation of neonatal exposure to 2,2',4,4',5-pentabromodiphenyl ether." *Environmental Health Perspectives* 114(2): 254-259.

Alm, H., et al. (2010). "In vitro neurotoxicity of PBDE-99: immediate and concentration-dependent effects on protein expression in cerebral cortex cells." *J Proteome Res* 9(3): 1226-1235.

Alm, H., et al. (2008). "Combined genomic and proteomic in-vitro approach to study mechanisms behind PBDE-99 induced neurotoxicity." *Society for Neuroscience Abstract Viewer and Itinerary Planner* 38.

Al-Mousa, F. and F. Michelangeli (2012). "Some commonly used brominated flame retardants cause Ca<sup>2+</sup>-ATPase inhibition, beta-amyloid peptide release and apoptosis in SH-SY5Y neuronal cells." *PLoS One* 7(4): e33059.

Al-Mousa, F. and F. Michelangeli (2014). "The sarcoplasmic-endoplasmic reticulum Ca(2+)-ATPase (SERCA) is the likely molecular target for the acute toxicity of the brominated flame retardant hexabromocyclododecane (HBCD)." *Chem Biol Interact* 207: 1-6.

Alonso, V., et al. (2010). "BDE-99 exposed rats: An assessment of the hormonal status and biochemical parameters in adult animals." *Toxicology Letters* 196: S56-S57.

Altamura, A. C., et al. (2011). "The impact of brief depressive episodes on the outcome of bipolar disorder and major depressive disorder: a 1-year prospective study." *J Affect Disord* 134(1-3): 133-137.

Altan, L., et al. (2003). "Anxiety and depression in Ankylosing spondylitis patients." *Journal of Rheumatology and Medical Rehabilitation* 14(4): 221-227.

Althaus, F., et al. (2013). Characteristics of highly frequent users of a Swiss academic emergency department: a retrospective consecutive case series. *Eur J Emerg Med.* 20: 413-419. [European journal of emergency medicine : official journal of the European Society for Emergency Medicine].

Altmann, L., et al. (2002). "Developmental Exposure To PBDE Impairs Functional Plasticity In Brain Slices." *Toxicol Lett* 135(Suppl 1): S83.

Alves, M., et al. (2011). "Measurement of hypobaric hypoxia induced by air travel in healthy young adults." *American Journal of Respiratory and Critical Care Medicine* 183(1).

Alves, T. C., et al. (2009). "Regional gray matter reductions in elderly subjects with cardiovascular risk factors: A possible link between microvascular lesions and Alzheimer's disease." *Journal of the Neurological Sciences* 283(1-2): 311-312.

Ament, I., et al. (2008). "Influence of spatial structure on the maintenance of sexual reproduction." *J Theor Biol* 254(3): 520-528.

An, J., et al. (2014). "Oligomeric proanthocyanidins alleviate hexabromocyclododecane-induced cytotoxicity in HepG2 cells through regulation on ROS formation and mitochondrial pathway." *Toxicology in Vitro* 28(2): 319-326.

An, J., et al. (2011). "The cytotoxic effects of synthetic 6-hydroxylated and 6-methoxylated polybrominated diphenyl ether 47 (BDE47)." *Environ Toxicol* 26(6): 591-599.

Ando, M., et al. (1988). "Endotoxin cerebral blood flow amino acids and brain damage in young rabbits." *Brain Dev* 10(6): 365-370.

Andrieux, K. and P. Couvreur (2013). "Nanomedicine as a promising approach for the treatment and diagnosis of brain diseases: the example of Alzheimer's disease." *Ann Pharm Fr.* 71(4): 225-233. [Annales pharmaceutiques francaises].

Angioni, S. A., et al. (2013). "Study of the toxic effects of flame retardant PBDE-47 on the clam *Chamelea gallina* (Linnaeus, 1758)." *Vet Ital* 49(1): 69-77.

Angst, J. and A. Dobler-Mikola (1985). "The Zurich Study--a prospective epidemiological study of depressive, neurotic and psychosomatic syndromes. IV. Recurrent and nonrecurrent brief depression." *Eur Arch Psychiatry Neurol Sci* 234(6): 408-416.

Annamalai, J. and V. Namasivayam (2015). "Endocrine disrupting chemicals in the atmosphere: Their effects on humans and wildlife." *Environment International* 76: 78-97.

Annoura, H., et al. (2002). "Synthesis and biological evaluation of new 4-arylpiperidines and 4-aryl-4-piperidinols: dual Na(+) and Ca(2+) channel blockers with reduced affinity for dopamine D(2) receptors." *Bioorg Med Chem* 10(2): 371-383.

Anonymous (1977). "Report Of The Subcommittee On Polybrominated Biphenyls. DHEW Committee To Coordinate Toxicology And Related Programs." National Institutes of Health, Public Health Service, Department of Health, Education, and Welfare, Research Triangle Park, North Carolina 40(80): 19771977.

Anonymous (1994). "Polybrominated biphenyls." *Environmental Health Criteria* 152(1994).

Anonymous (1999). "Tris(2-chloroethyl) phosphate." *IARC Monographs on the evaluation of the carcinogenic risk of chemicals to humans* 3(1999).

Anonymous (2001). "Trisphosphates." *NICNAS: Priority existing chemical assessment report* 17(2001).

Anonymous (2003). "Feeding habits and distributional records of 11 species of neotropical Scarabaeinae (Coleoptera: Scarabaeidae)." *Coleopterists Bulletin* 57(2): 131-132.

Anonymous (2003). "Tetrabrombisphenol A (December 2002)." *Beratergremium fuer umweltrelevante Altstoffe* 239(2003).

Anonymous (2004). "Bis(Pentabromophenyl)Ether." *European Union risk assessment report* 17(2004).

Anonymous (2004). "Toxicological profile for Polybrominated Biphenyls and Polybrominated Diphenyl Ethers (update)." *Agency for Toxic Substances and Disease Registry U.S. Public Health Service* 564.

Anonymous (2007). "35th Annual Conference of the European-Teratology-Society, Bratislava, SLOVAKIA, September 01 -05, 2007." *Reproductive Toxicology* 24(1, Sp. Iss. SI): 57-80.



Anonymous (2012). "National Student Conference of the Canadian Society for Epidemiology and Biostatistics, Saskatoon, Canada, May 13-14, 2012 Abstracts." *American Journal of Epidemiology* 176(1): 80.

Anonymous (2013). "37th Annual Meeting of the Neurobehavioral-Teratolgy-Society Held in Conjunction with the 53rd Annual Meeting of the Teratology-Society / 26th Annual Meeting of the Organization-of-Teratolgy-Information-Specialists, Tucson, AZ, USA, June 22 -26, 2013." *Neurotoxicology and Teratology* 37: 74-89.

Antonijevic, B., et al. (2012). "TOXICITY MECHANISMS AND INTERACTIONS OF POLYCHLORINATED BIPHENYLS AND POLYBROMINATED DIPHENYLEETHERS." *Veterinarski Glasnik* 66(3-4): 259-271.

Api, A. M. and R. A. Ford (2003). "Evaluation of the dermal subchronic toxicity of diphenyl ether in the rat." *Food Chem Toxicol* 41(2): 259-264.

Arabasadi, Z., et al. (2013). "Prediction and optimization of fireproofing properties of intumescent flame retardant coatings using artificial intelligence techniques." *Fire Safety Journal* 61: 193-199.

Arnold, R. G., et al. (2008). Fate of polybrominated diphenyl ethers during wastewater treatment/polishing and sludge stabilization/disposal. 1140: 394-411.

Arnould, J. P., et al. (1998). "Detection of benzo(a)pyrene-DNA adducts from leukocytes from heavy smokers." *Pathologie Biologie* 46(10): 787-790.

Arthur, T. and E. I. Bain (2002). "Workplace violence and chemical exposure: A 73-year-old CVA patient assaults nurses with a fire extinguisher." *Journal of Emergency Nursing* 28(6): 484-488.

Ashley, C. D. and T. E. Bernard (2008). "Effects of Hoods and Flame-Retardant Fabrics on WBGT Clothing Adjustment Factors." *J Occup Environ Hyg* 5(1): 59-62.

Ashley, J. T. F., et al. (2013). "Children's daily exposure to polychlorinated biphenyls from dietary supplements containing fish oils." *Food Additives and Contaminants Part a-Chemistry Analysis Control Exposure & Risk Assessment* 30(3): 506-514.

Ashwood, P., et al. (2009). "Preliminary evidence of the in vitro effects of BDE-47 on innate immune responses in children with autism spectrum disorders." *J Neuroimmunol* 208(1-2): 130-135.

Atema, J., et al. (1973). THE IMPORTANCE OF CHEMICAL SIGNALS IN STIMULATING BEHAVIOR OF MARINE ORGANISMS EFFECTS OF ALTERED ENVIRONMENTAL CHEMISTRY ON ANIMAL COMMUNICATION.

Aust, S. D. (1984). ON THE MECHANISM OF ANOREXIA AND TOXICITY OF 2,3,7,8-TETRACHLORODIBENZO-P-DIOXIN AND RELATED COMPOUNDS. Poland, A. And R. D. Kimbrough: 309-318.

Avery, C. E. (1982). "CONSUMER RESPONSE TO THE TRIS TRIS-2,3-DIBROMOPROPYL PHOSPHATE CONTROVERSY: A RESEARCH STUDY." *Accident Analysis and Prevention* 14(6): 465-474.

Azevedo Sao Leao Ferreira, K., et al. (2006). "The WHO analgesic ladder for cancer pain control, twenty years of use. How much pain relief does one get from using it?" *Supportive Care in Cancer* 14(11): 1086-1093.

Baba, A. (2007). "[Molecular pharmacologic approaches to functional analysis of new biological target molecules for drug discovery]." *Yakugaku Zasshi* 127(10): 1643-1654.

Babu, B. R., et al. (2007). "Electrical and electronic waste: A global environmental problem." *Waste Management and Research* 25(4): 307-318.

Babushok, V., et al. (1996). "Influence of CF<sub>3</sub>I, CF<sub>3</sub>Br, and CF<sub>3</sub>H on the high-temperature combustion of methane." *Combustion and Flame* 107(4): 351-367.

Bailey, J., et al. (2013). "Behavioral effects of short-term exposure to Firemaster 550." *Neurotoxicology and Teratology* 37: 86-86.

Bailey-Wilson, J. E. (2009). Genetic Epidemiology of Complex Traits. RePORTER Database National Institutes of Health.

Bailey-Wilson, J. E. (2011). Genetic Epidemiology of Complex Traits. RePORTER Database National Institutes of Health.

Bailey-Wilson, J. E. (2012). Genetic Epidemiology of Complex Traits. RePORTER Database National Institutes of Health.

Bailey-Wilson, J. E. (2013). Genetic Epidemiology of Complex Traits. RePORTER Database National Institutes of Health.

Baillie, A. J. and R. P. Mattick (1996). "The benzodiazepine dependence questionnaire: development, reliability and validity." *Br J Psychiatry* 169(3): 276-281.

Bakker, M. I., et al. (2008). "Dietary intake and risk evaluation of polybrominated diphenyl ethers in The Netherlands." *Mol Nutr Food Res* 52(2): 204-216.

Banasik, M. (2009). "Comment on Gee and Moser (2008) "Acute postnatal exposure to brominated diphenylether 47 delays neuromotor ontogeny and alters motor activity in mice"." *Neurotoxicol Teratol* 31(3): 188-190; author reply 187.

Banasik, M. (2010). "Prenatal PBDEs and neurodevelopment: animal studies and human health assessment." *Environ Health Perspect* 118(11): A468; author reply A469-470.

Banasik, M., et al. (2009). "Comment on "Elevated House Dust and Serum Concentrations of PBDEs in California: Unintended Consequences of Furniture Flammability Standards?"". *Environmental Science & Technology* 43(7): 2659-2660.

Banasik, M., et al. (2010). "Comment on "Brominated flame retardants in children's toys: Concentration, composition, and children's exposure and risk assessment"". *Environmental Science and Technology* 44(3): 1152-1153.

Banasik, M., et al. (2010). "Developmental immunotoxicity and the importance of controlling for litter effects." *Environmental Toxicology and Pharmacology* 29(1): 1-2.

Banasik, M., et al. (2009). "Provisional human health risk assessment of PBDEs in sewage sludge used for agricultural purposes." *Chemosphere* 77(5): 699-701.

Banasik, M. and D. Suchecka (2011). "Neurotoxicity of PBDEs on the developing nervous system." *Environ Health Perspect* 119(8): A331; author reply A331-332.

Bansal, R., et al. (2014). "Polybrominated diphenyl ether (DE-71) interferes with thyroid hormone action independent of effects on circulating levels of thyroid hormone in male rats." *Endocrinology* 155(10): 4104-4112.

Bansal, R. and R. T. Zoeller (2008). "Polychlorinated biphenyls (Aroclor 1254) do not uniformly produce agonist actions on thyroid hormone responses in the developing rat brain." *Endocrinology* 149(8): 4001-4008.

Barbosa, M. H., et al. (2009). "Therapeutic properties of propolis for treatment of skin lesions." *Acta Paulista De Enfermagem* 22(3): 318-322.

Baril, M., et al. (1998). "Environmental Health Criteria 209: Flame retardants: Tris(chloropropyl) phosphate and tris(2-chloroethyl) phosphate." *Environmental Health Criteria*(209): I-106.

Barmashenko, G., et al. (2014). "Regulation of hippocampal synaptic plasticity thresholds and changes in exploratory and learning behavior in dominant negative NPR-B mutant rats." *Front Mol Neurosci* 7: 95.

Barouki, R., et al. (2012). "Developmental origins of non-communicable disease: Implications for research and public health." *Environmental Health: A Global Access Science Source* 11(1).

Barret, B. (2011). E-LEARNING AS A PROCESS TO CREATE AND IMPLEMENT BETTER VIRTUAL APPLICATIONS AND STRATEGIC TOOLS FOR STUDENTS

WITH DISABILITIES. Valenica, Iated-Int Assoc Technology Education a& Development.

Barrett, B. (2011). "STRATEGIC TOOLS FOR STUDENTS WITH DISABILITIES: CREATING AND IMPLEMENTING E-LEARNING OPPORTUNITIES IN THE VIRTUAL LEARNING ENVIRONMENT." Inted2011: 5th International Technology, Education and Development Conference: 6076-6085.

Barrett, J. R. (2010). "Parallel outcomes: Comparing effects of environmental contaminant exposures with ADHD in children." *Environmental Health Perspectives* 118(12): A542.

Barros, D. G. and A. M. Chiesa (2007). "AUTONOMY AND HEALTH NEEDS IN THE SYSTEMATIZATION OF NURSING ASSISTANCE UNDER THE OPTICS OF THE PRIMARY CARE." *Revista Da Escola De Enfermagem Da Usp* 41: 793-798.

Barros, D. G. and A. M. Chiesa (2007). "[Autonomy and health needs in the systematization of nursing assistance under the optics of the primary care]." *Rev Esc Enferm USP* 41 Spec No: 793-798.

Basu, N. and J. Head (2010). "Mammalian wildlife as complementary models in environmental neurotoxicology." *Neurotoxicol Teratol* 32(1): 114-119.

Basu, N., et al. (2007). "Polychlorinated biphenyls, organochlorinated pesticides, and polybrominated diphenyl ethers in the cerebral cortex of wild river otters (*Lontra canadensis*)." *Environmental Pollution* 149(1): 25-30.

Bayat, S., et al. (2014). "Organic contaminants in bats: Trends and new issues." *Environment International* 63: 40-52.

Bechshíft, T., et al. (2012). Associations between complex OHC mixtures and thyroid and cortisol hormone levels in East Greenland polar bears. *Environ Res.* 2012, Jul; 116:26-35. [Environmental research].

Beck, M. J., et al. (2009). "An oral developmental neurotoxicity study of decabromodiphenyl ether (DecaBDE) in rats, including assessment of maternal and neonatal exposure profiles." *Society for Neuroscience Abstract Viewer and Itinerary Planner* 39.

Belcher, S. M. (2014). "Editorial overview: Endocrine and metabolic diseases: Conversations on endocrine disruptors - Rising above the din." *Current Opinion in Pharmacology* 19: vi-vii.

Belik, J., et al. (2003). "Airway smooth muscle changes in the nitrofen-induced congenital diaphragmatic hernia rat model." *Pediatr Res* 53(5): 737-743.

Bellanger, M., et al. (2015). "Neurobehavioral Deficits, Diseases and Associated Costs of Exposure to Endocrine Disrupting Chemicals in the European Union." *J Clin Endocrinol Metab*: jc20144323.

Beller, M., et al. (2001). Process for the preparation of 2,3-Dihydroindoles (indolines), novel 2,3-dihydroindoles, and their use, Aventis Research and Technologies GmbH and Co. KG, Frankfurt am Main, Germany.

Belles, M., et al. (2010). "Behavioral effects and oxidative status in brain regions of adult rats exposed to BDE-99." *Toxicol Lett* 194(1-2): 1-7.

Bellinger, D. C. (2013). "Prenatal Exposures to Environmental Chemicals and Children's Neurodevelopment: An Update." *Saf Health Work* 4(1): 1-11.

Benasutti, M., et al. (1988). "CONSTRUCTION OF AN ESCHERICHIA-COLI VECTOR CONTAINING THE MAJOR DNA ADDUCT OF ACTIVATED BENZO-A-PYRENE AT A DEFINED SITE." *Chemical Research in Toxicology* 1(3): 160-168.

Benbaibeche, H., et al. (2014). "Relationship between eating behaviour disorders, obesity and type 2 diabetes: Effects of hormonal corticotropic axis and visceral adiposity." *Fundamental and Clinical Pharmacology* 28: 8.

Benedetti, R. P. (1979). "Understanding fire retardant and flame resistant materials." *J Am Coll Health Assoc* 27(6): 311-314.

Bengua, G., et al. (2006). "TPD-based evaluation of near threshold mono-energetic proton energies for the  $(7)\text{Li}(p,n)(7)\text{Be}$  production of neutrons for BNCT." *Phys Med Biol* 51(16): 4095-4109.

Bennett, D. (2011). "Persistent consumer products in the indoor environment: Does exposure science protect us?" *Epidemiology* 22: S182.

Benson, R., et al. (2000). "Environmental Health Criteria 218. Flame retardants: Tris(2-butoxyethyl) phosphate, tris(2-ethylhexyl) phosphate and tetrakis(hydroxymethyl) phosphonium salts." *Environmental Health Criteria*(218): I-130.

Berghuis, S. A., et al. (2015). "Developmental neurotoxicity of persistent organic pollutants: an update on childhood outcome." *Arch Toxicol*.

Bergman, A., et al. (2013). "The impact of endocrine disruption: A consensus statement on the state of the science." *Environmental Health Perspectives* 121(4): A104-A106.

Bergman, A., et al. (2012). "A novel abbreviation standard for organobromine, organochlorine and organophosphorus flame retardants and some characteristics of the chemicals." *Environ Int* 49: 57-82.

Bernstein, A. I., et al. (2014). "The vesicular monoamine transporter 2: An underexplored pharmacological target." *Neurochemistry International* 73: 89-97.

Berrier, R. E., et al. (1999). "Hydrocarbon blown rigid polyurethane foam for the boardstock industry - A novel approach." *Journal of Cellular Plastics* 35(4): 311-+.

Bertolani, R., et al. (2004). "Experiences with dormancy in tardigrades." *Journal of Limnology* 63: 16-25.

Betts, K. S. (2010). "Brain drain? PBDEs alter development of human brain cells." *Environ Health Perspect* 118(4): A173.

Betts, K. S. (2010). "An inkling of suspicion: prenatal exposure to PBDEs and neurodevelopmental impairment." *Environ Health Perspect* 118(5): A216.

Betts, K. S. (2011). "Chemical count: Quantifying exposures in pregnant women." *Environmental Health Perspectives* 119(6): A258.

Betts, K. S. (2011). "Thyroid hormone understanding branches out: insights into PBDE impacts on brain development." *Environ Health Perspect* 119(2): A80-81.

Betts, K. S. (2013). "Lasting impacts: pre- and postnatal PBDE exposures linked to IQ deficits." *Environ Health Perspect* 121(2): a58.

Betts, K. S. (2014). "More evidence for PBDEs as neurotoxicants: cohort study corroborates earlier findings." *Environ Health Perspect* 122(8): A221.

Betts, K. S. (2015). "Tracking alternative flame retardants." *Environmental Health Perspectives* 123(2): A44.

Bian, W. and D. C. Tao (2010). "Biased Discriminant Euclidean Embedding for Content-Based Image Retrieval." *Ieee Transactions on Image Processing* 19(2): 545-554.

Bianki, V. L., et al. (1990). "[The preference for movement direction in a T-maze in planarians]." *Zh Vyssh Nerv Deiat Im I P Pavlova* 40(1): 102-107.

Bianki, V. L., et al. (1990). "PREFERENCE OF MOVEMENT DIRECTION IN A T-MAZE IN PLANARIA." *Zhurnal Vysshei Nervnoi Deyatel'nosti Imeni I. P. Pavlova* 40(1): 102-107.

Biesemeier, J. A., et al. (2012). "Comment on: " Characterization of maternal transfer of decabromodiphenyl ether (BDE-209) administered to pregnant Sprague-Dawley rats". " *Reproductive Toxicology* 33(1): 116-117.

Bieseemeier, J. A., et al. (2011). "Comment on: " Impaired oligodendroglial development by decabromodiphenyl ether in rat offspring after maternal exposure from mid-gestation through lactation"." *Reproductive Toxicology* 32(3): 372-374.

Bieseemeier, J. A., et al. (2010). "Effects of dose, administration route, and/or vehicle on decabromodiphenyl ether concentrations in plasma of maternal, fetal, and neonatal rats and in milk of maternal rats." *Drug Metab Dispos* 38(10): 1648-1654.

Bieseemeier, J. A., et al. (2011). "An oral developmental neurotoxicity study of decabromodiphenyl ether (DecaBDE) in rats." *Birth Defects Res B Dev Reprod Toxicol* 92(1): 17-35.

BIRNBAUM, L. S. (2005). "PBDES: TOXICOLOGY UPDATE." Presented at 2005 National Forum on Contaminants in Fish, Bethesda, MD, September 18 - 21, 2005.

Birnbaum, L. S. and E. A. Cohen Hubal (2006). "Polybrominated diphenyl ethers: a case study for using biomonitoring data to address risk assessment questions." *Environ Health Perspect.* 114(11): 1770-1775. (Levesque et al.).

Birnbaum, L. S. and D. F. Staskal (2004). Brominated flame retardants: cause for concern? *Environ Health Perspect.* 112: 9-17. (Levesque et al.).

Bjelogrić, N., et al. (1989). "BENZO-A-PYRENE DNA ADDUCTS AND MONOOXYGENASE ACTIVITIES IN MICE TREATED WITH BENZO-A-PYRENE CIGARETTE SMOKE OR CIGARETTE SMOKE CONDENSATE." *Chemico-Biological Interactions* 70(1-2): 51-62.

Blake, C. A., et al. (2011). "Perinatal exposure to low-dose DE-71 increases serum thyroid hormones and gonadal osteopontin gene expression." *Exp Biol Med (Maywood)* 236(4): 445-455.

Blanco, J., et al. (2011). "BDE-99 causes down regulation of BDNF and Bcl-2 in primary rat neuronal culture." *Toxicology* 290(2-3): 9-10.

Blanco, J., et al. (2012). "Gestational exposure to BDE-99 produces toxicity through upregulation of CYP isoforms and ROS production in the fetal rat liver." *Toxicological Sciences* 127(1): 296-302.

Blanco, J., et al. (2013). "Perinatal exposure to BDE-99 causes learning disorders and decreases serum thyroid hormone levels and BDNF gene expression in hippocampus in rat offspring." *Toxicology* 308: 122-128.

Blanco, J., et al. (2011). "BDE-99 deregulates BDNF, Bcl-2 and the mRNA expression of thyroid receptor isoforms in rat cerebellar granular neurons." *Toxicology* 290(2-3): 305-311.

- Bloom, M., et al. (2012). "Exposure to persistent organohalogen pollutants is associated with thyroid function among older residents of upper hudson river communities." *Epidemiology* 23(5): S296.
- Bloom, M. S., et al. (2014). "Thyroid hormones are associated with exposure to persistent organic pollutants in aging residents of upper Hudson River communities." *International Journal of Hygiene and Environmental Health* 217(4-5): 473-482.
- Boas, M., et al. (2006). "Environmental chemicals and thyroid function." *European Journal of Endocrinology* 154(5): 599-611.
- Boas, M., et al. (2009). "Environmental chemicals and thyroid function: An update." *Current Opinion in Endocrinology, Diabetes and Obesity* 16(5): 385-391.
- Boer, J. (2008). "BFR Scientific Meetings: from Workshops to Symposium." *Chemosphere* 73(2): 143.
- Boeswillwald, M., et al. (1967). "Intellectual predictions of 71 children between the ages of 2 and 13 years afflicted at birth with non-complicated Rh hemolytic disease." *Archives fran?aises de p?diatrie* 24(6): 687-691.
- Bonvallot, N., et al. (2010). "Health ranking of ingested semi-volatile organic compounds in house dust: an application to France." *Indoor Air* 20(6): 458-472.
- Bosc, E., et al. (1975). "[Letter: Cardiac rhythm disorders after taking fenoxedil chlorhydrate]." *Nouv Presse Med* 4(31): 2269.
- Bossart, G. D. (2011). "Marine Mammals as Sentinel Species for Oceans and Human Health." *Veterinary Pathology* 48(3): 676-690.
- Bostan, V., et al. (2010). "A comparison of two automated systems used in invertebrate behavioural quantification." *Canadian Technical Report of Fisheries and Aquatic Sciences* 2883: 101.
- Boswell, R. F., Jr., et al. (1974). "Synthesis of some N-carboxylic acid derivatives of 3-phenoxyprolidines, 4-phenoxyperidines, and 3-phenoxytropanes with muscle relaxant and anticonvulsant activities." *J Med Chem* 17(9): 1000-1008.
- Bourgeon, S., et al. (2012). "Individual variation in biomarkers of health: influence of persistent organic pollutants in Great skuas (*Stercorarius skua*) breeding at different geographical locations." *Environ Res* 118: 31-39.
- Bourguignon, J. P. and A. S. Parent (2010). "Early homeostatic disturbances of human growth and maturation by endocrine disrupters." *Current Opinion in Pediatrics* 22(4): 470-477.



Bourkou, M. E., et al. (2010). "Polybromodiphenylethers exposure and thyroid hormones in Quebec pregnant women." *Toxicology Letters* 196: S66.

Bouwman, H., et al. (2015). "Chlorinated, brominated and fluorinated organic pollutants in African Penguin eggs: 30 years since the previous assessment." *Chemosphere* 126: 1-10.

Braaten, O. (1996). "Artificial intelligence in pediatrics: important clinical signs in newborn syndromes." *Comput Biomed Res* 29(3): 153-161.

Bradman, A., et al. (2007). "Polybrominated diphenyl ether levels in the blood of pregnant women living in an agricultural community in California." *Environmental Health Perspectives* 115(1): 71-74.

Bradman, A. S. A. (2009). Project B: Mn, DDT/E, PBDE Exposure to Farmworker Children. RePORTER Database National Institutes of Health.

Bradman, A. S. A. (2010). Project B: Mn, DDT/E, PBDE Exposure to Farmworker Children. RePORTER Database National Institutes of Health.

Bradman, A. S. A. (2011). Project B: Mn, DDT/E, PBDE Exposure to Farmworker Children. RePORTER Database National Institutes of Health.

Bradman, A. S. A. (2012). Project B: Mn, DDT/E, PBDE Exposure to Farmworker Children. RePORTER Database National Institutes of Health.

Bradman, A. S. A. (2013). Current-Use Flame Retardants: Maternal Exposure and Neurodevelopment in Children. RePORTER Database National Institutes of Health.

Bradman, A. S. A. (2013). Project B: Mn, DDT/E, PBDE Exposure to Farmworker Children. RePORTER Database National Institutes of Health.

Bradner, J. M., et al. (2013). "Alterations to the circuitry of the frontal cortex following exposure to the polybrominated diphenyl ether mixture, DE-71." *Toxicology* 312: 48-55.

Bradner, J. M., et al. (2013). "Exposure to the polybrominated diphenyl ether mixture DE-71 damages the nigrostriatal dopamine system: role of dopamine handling in neurotoxicity." *Exp Neurol* 241: 138-147.

Branch, C. A., et al. (1994). "Evaluation of the acute cardiac and central nervous system effects of the fluorocarbon trifluoromethane in baboons." *J Toxicol Environ Health* 43(1): 25-35.

Branchi, I., et al. (2002). "Effects of perinatal exposure to a polybrominated diphenyl ether (PBDE 99) on mouse neurobehavioural development." *Neurotoxicology* 23(3): 375-384.

- Branchi, I., et al. (2003). "Polybrominated diphenyl ethers: neurobehavioral effects following developmental exposure." *Neurotoxicology* 24(3): 449-462.
- Branchi, I., et al. (2005). "Early developmental exposure to BDE 99 or Aroclor 1254 affects neurobehavioural profile: interference from the administration route." *Neurotoxicology* 26(2): 183-192.
- Brandt, B. L. (2012). "Household environmental toxins and neurodevelopment in children."
- Bratberg, M., et al. (2013). "Effects of oil pollution and persistent organic pollutants (POPs) on glycerophospholipids in liver and brain of male Atlantic cod (*Gadus morhua*)."  
*Chemosphere* 90(7): 2157-2171.
- Braun, J. M., et al. (2014). "Gestational exposure to endocrine-disrupting chemicals and reciprocal social, repetitive, and stereotypic behaviors in 4- and 5-year-old children: the HOME study." *Environ Health Perspect* 122(5): 513-520.
- Breier, J. M., et al. (2010). "Neural progenitor cells as models for high-throughput screens of developmental neurotoxicity: State of the science." *Neurotoxicology and Teratology* 32(1): 4-15.
- Brock, W. J., et al. (2010). "Oral repeat dose and reproductive toxicity of the chlorinated flame retardant Dechlorane Plus." *Int J Toxicol* 29(6): 582-593.
- Brodan, V. and E. Kuhn (1967). "Changes in the score of the Harvard step test during a 5-day vigil. (Preliminary report)." *Pracovni? l?ka?stvi* 19(3): 110-111.
- Brodbeck, T. (1988). "STRAIN-SPECIFIC LEARNING AND BEHAVIORAL-DIFFERENCES OF BDE/HAN AND DA/HAN RATS IN AN ELEVATED MAZE WHILE UNDER THE INFLUENCE OF A TRANQUILIZER." *Deutsche Tierärztliche Wochenschrift* 95(1): 31-31.
- Brody, J. G., et al. (2010). Ethical and Legal Challenges in Communicating Individual Biomonitoring and Person. RePORTER Database National Institutes of Health.
- Brody, J. G., et al. (2011). Ethical and Legal Challenges in Communicating Individual Biomonitoring and Person. RePORTER Database National Institutes of Health.
- Brody, J. G., et al. (2012). Ethical and Legal Challenges in Communicating Individual Biomonitoring and Person. RePORTER Database National Institutes of Health.
- Brotman, R. M., et al. (2014). "Association between cigarette smoking and the vaginal microbiota: a pilot study." *BMC Infect Dis* 14: 471.

- Brotman, R. M., et al. (2013). "Biomarkers of cigarette smoking and association with the vaginal microbiota." *Sexually Transmitted Infections* 89.
- Brouwers, M. M., et al. (2009). "Occupational exposure to potential endocrine disruptors: Further development of a job exposure matrix." *Occupational and Environmental Medicine* 66(9): 607-614.
- Brown, G. G. and R. Nixon (1979). "Exposure to polybrominated biphenyls. Some effects on personality and cognitive functioning." *Journal of the American Medical Association* 242(6): 523-527.
- Brown, V. (2003). "Disrupting a delicate balance: Environmental effects on the thyroid." *Environmental Health Perspectives* 111(12): A642-A649.
- Brunelle, P. and A. Rauk (2004). "One-electron oxidation of methionine in peptide environments: The effect of three-electron bonding on the reduction potential of the radical cation." *Journal of Physical Chemistry A* 108(50): 11032-11041.
- Bulathsinghala, A. T. and I. C. Shaw (2014). "The toxic chemistry of methyl bromide." *Hum Exp Toxicol* 33(1): 81-91.
- Bull, K., et al. (2007). "Dietary and in utero exposure to a pentabrominated diphenyl ether mixture did not affect cholinergic parameters in the cerebral cortex of ranch mink (*Mustela vison*)." *Toxicol Sci* 96(1): 115-122.
- Bunke, D., et al. (2001). "Household chemicals as a source of human exposure: Problematic substances, product groups and reduction options." *Umweltmedizin in Forschung und Praxis* 6(6): 323-335.
- Buratovic, S., et al. (2012). "Neonatal exposure to a single dose of ionising radiation during brain development can cause cognitive defects and increased levels of tau in adult mice." *Society for Neuroscience Abstract Viewer and Itinerary Planner* 42.
- Buratovic, S., et al. (2012). "Developmental exposure to PBDE 209: Sex, neuroprotein and neurobehavioural analyses." *Toxicology Letters* 211: S48.
- Buratovic, S., et al. (2014). "Developmental exposure to the polybrominated diphenyl ether PBDE 209: Neurobehavioural and neuroprotein analysis in adult male and female mice." *Environ Toxicol Pharmacol* 38(2): 570-585.
- Burka, L. T., et al. (1991). "Metabolism of tris(2-chloroethyl) phosphate in rats and mice." *Drug Metabolism and Disposition* 19(2): 443-447.
- Burka, L. T., et al. (1991). "Metabolism of Tris(2-chloroethyl)phosphate in Rats and Mice." *Drug Metabolism and Disposition* 19(2): 443-447.

- Busby, J. S., et al. (2009). "Interrupting the social amplification of risk process: a case study in collective emissions reduction." *Environmental Science and Policy* 12(3): 297-308.
- Bustnes, J. O., et al. (2012). "Latitudinal Distribution of Persistent Organic Pollutants in Pelagic and Demersal Marine Fish on the Norwegian Coast." *Environmental Science & Technology* 46(14): 7836-7843.
- Bustnes, J. O., et al. (2011). "Impacts of Climate and Feeding Conditions on the Annual Accumulation (1986-2009) of Persistent Organic Pollutants in a Terrestrial Raptor." *Environmental Science & Technology* 45(17): 7542-7547.
- Butt, C. M., et al. (2014). "Metabolites of organophosphate flame retardants and 2-ethylhexyl tetrabromobenzoate in urine from paired mothers and toddlers." *Environ Sci Technol* 48(17): 10432-10438.
- Buttke, D. E., et al. (2013). "Associations between serum levels of polybrominated diphenyl ether (PBDE) flame retardants and environmental and behavioral factors in pregnant women." *J Expo Sci Environ Epidemiol* 23(2): 176-182.
- Byun, H. M., et al. (2015). "Epigenetic effects of low perinatal doses of flame retardant BDE-47 on mitochondrial and nuclear genes in rat offspring." *Toxicology* 328: 152-159.
- Cai, Y., et al. (2012). "Response to comment on " Characterization of maternal transfer of decabromodiphenyl ether (BDE-209) administered to pregnant Sprague-Dawley rats" by Biesemeier et al." *Reproductive Toxicology* 33(1): 118-119.
- Cai, Y. M., et al. (2011). "Characterization of maternal transfer of decabromodiphenyl ether (BDE-209) administered to pregnant Sprague-Dawley rats." *Reproductive Toxicology* 31(1): 106-110.
- Camacho, A. C. (2009). "[Analysis of national publications about distance education in nursing]." *Rev Bras Enferm* 62(4): 588-593.
- Canadell, J., et al. (2006). "Microwave-assisted synthesis of a novel phosphorus-containing spiroorthoester, characterization and cationic polymerization." *Journal of Polymer Science Part a-Polymer Chemistry* 44(16): 4722-4730.
- Canesi, L., et al. (2005). "Effects of the brominated flame retardant tetrabromobisphenol-A (TBBPA) on cell signaling and function of *Mytilus* hemocytes: involvement of MAP kinases and protein kinase C." *Aquat Toxicol* 75(3): 277-287.
- Cankar, P., et al. (2013). 4-arylazo-3,5-diamino-pyrazole compounds and use thereof, Univerzita Palackeho V Olomouci.

- Cano, A., et al. (2013). "Locally averaged Bayesian Dirichlet metrics for learning the structure and the parameters of Bayesian networks." *International Journal of Approximate Reasoning* 54(4): 526-540.
- Capone, F., et al. Neurobehavioural effects induced by perinatal or postnatal exposure to a polybrominated diphenyl ether (PBDE 99). Are they due to different times of exposure, or to differences in administration procedure?, *Arti Grafiche Editoriali*.
- Capone, F., et al. (2004). "Effects of perinatal exposure to PBDE 99 and A1254 on mouse neurobehavioral development." *Neurotoxicology (Amsterdam)* 25(4): 721.
- Carignan, C. C., et al. (2012). "Predictors of tetrabromobisphenol-A (TBBP-A) and hexabromocyclododecanes (HBCD) in milk from Boston mothers." *Environ Sci Technol* 46(21): 12146-12153.
- Carignan, C. C., et al. (2013). "Predictors of tris(1,3-dichloro-2-propyl) phosphate metabolite in the urine of office workers." *Environ Int* 55: 56-61.
- Carlson, D. L., et al. (2010). "On the rate of decline of persistent organic contaminants in lake trout (*Salvelinus namaycush*) from the great lakes, 1970-2003." *Environmental Science and Technology* 44(6): 2004-2010.
- Carlsson, H., et al. (1997). "Organophosphate ester flame retardants and plasticizers in the indoor environment: Analytical methodology and occurrence." *Environmental Science and Technology* 31(10): 2931-2936.
- Carman, J. S., et al. (1978). "Effects of a selective inhibitor of type A monoamine oxidase--Lilly 51641--on behavior, sleep and circadian rhythms in depressed and schizophrenic patients." *Commun Psychopharmacol* 2(6): 513-523.
- Carpenter, D. O. (2011). "Health effects of persistent organic pollutants: the challenge for the Pacific Basin and for the world." *Rev Environ Health* 26(1): 61-69.
- Carpenter, D. O. (2013). "Intellectual Developmental Disability Syndromes and Organic Chemicals." *Effects of Persistent and Bioactive Organic Pollutants on Human Health*: 421-447.
- Carpenter, D. O. (2015). *Occurrence and Human Health Risk of Emerging Organic Contaminants in E-Waste*. *Comprehensive Analytical Chemistry*, Elsevier. 67: 347-362.
- Carter, G. and D. J. O'Brien (1986). "THE IMPACT OF AEROMEDICAL HELICOPTER PROGRAMS ON EMERGENCY MEDICINE RESIDENT TRAINING RESIDENT ATTITUDES PERCEIVED RISKS AND BENEFITS." *Journal of Emergency Medicine* 4(6): 471-476.

Carvalho, A. M. and A. L. Oliveira (2007). Learning Bayesian networks consistent with the optimal branching. Los Alamitos, Ieee Computer Soc.

Cary, T. L. and W. H. Karasov (2013). Toxicokinetics of polybrominated diphenyl ethers across life stages in the northern leopard frog (*Lithobates pipiens*). *Environ Toxicol Chem.* 32: 1631-1640. [Environmental toxicology and chemistry / SETAC].

Casals-Casas, C. and B. Desvergne (2011). Endocrine Disruptors: From Endocrine to Metabolic Disruption. *Annual Review of Physiology*, Vol 73. D. Julius and D. E. Clapham, Annual Reviews, 4139 El Camino Way, Po Box 10139, Palo Alto, Ca 94303-0897 USA. 73: 135-162.

Casida, J. E. (1998). Organophosphorus insecticide toxicology. RePORTER Database National Institutes of Health.

Casida, J. E. (2000). Organophosphorus insecticide toxicology. RePORTER Database National Institutes of Health.

Casida, J. E. (2001). Organophosphorus insecticide toxicology. RePORTER Database National Institutes of Health.

Casida, J. E. (2002). Organophosphorus insecticide toxicology. RePORTER Database National Institutes of Health.

Casini, S., et al. (2010). "A non-lethal multi-biomarker approach to investigate the ecotoxicological status of Mediterranean loggerhead sea turtle (*Caretta caretta*, Linneo,1758)." *Comparative Biochemistry and Physiology - A Molecular and Integrative Physiology* 157: S23-S24.

Cassol, E., et al. (2014). Cerebrospinal fluid metabolomics reveals altered waste clearance and accelerated aging in HIV patients with neurocognitive impairment. *Aids.* 28: 1579-1591. [AIDS (London, England)].

Caudle, W. M. (2009). Vesicular monoamine transporter 2 as a mediator of PBDE neurotoxicity. RePORTER Database National Institutes of Health.

Caudle, W. M. (2010). Vesicular monoamine transporter 2 as a mediator of PBDE neurotoxicity. RePORTER Database National Institutes of Health.

Caudle, W. M. (2011). Vesicular monoamine transporter 2 as a mediator of PBDE neurotoxicity. RePORTER Database National Institutes of Health.

Caudle, W. M. (2012). Vesicular monoamine transporter 2 as a mediator of PBDE neurotoxicity. RePORTER Database National Institutes of Health.

- Caudle, W. M., et al. (2012). "Industrial toxicants and Parkinson's disease." *NeuroToxicology* 33(2): 178-188.
- Ceccatelli, R., et al. (2006). "Gene expression and estrogen sensitivity in rat uterus after developmental exposure to the polybrominated diphenylether PBDE 99 and PCB." *Toxicology* 220(2-3): 104-116.
- Cequier, E., et al. (2015). "Human exposure pathways to organophosphate triesters - A biomonitoring study of mother-child pairs." *Environment International* 75: 159-165.
- Cerruti, P., et al. (2008). "Morphological and thermal properties of cellulose-montmorillonite nanocomposites." *Biomacromolecules* 9(11): 3004-3013.
- Chae, H. S., et al. (2004). "The role of BF-7 on neuroprotection and enhancement of cognitive function." *Korean Journal of Physiology and Pharmacology* 8(4): 173-179.
- Chakraborty, A., et al. (2009). "DNA-protective effects of sumach (*Rhus coriaria* L.), a common spice: results of human and animal studies." *Mutat Res* 661(1-2): 10-17.
- Chakraborty, P., et al. (2013). "Atmospheric polychlorinated biphenyls in Indian cities: Levels, emission sources and toxicity equivalents." *Environmental Pollution* 182: 283-290.
- Chalupka, S. and A. N. Chalupka (2010). "The Impact of Environmental and Occupational Exposures on Reproductive Health." *Jognn-Journal of Obstetric Gynecologic and Neonatal Nursing* 39(1): 84-102.
- Chan, W. K. and K. M. Chan (2012). "Disruption of the hypothalamic-pituitary-thyroid axis in zebrafish embryo-larvae following waterborne exposure to BDE-47, TBBPA and BPA." *Aquat Toxicol* 108: 106-111.
- Chao, H. R., et al. (2014). "Impact of Brominated POPs on the Neurodevelopment and Thyroid Hormones of Young Children in an Indoor Environment-A Review." *Aerosol and Air Quality Research* 14(4): 1320-1332.
- Charboneau, J. P. and S. M. Koger (2008). "Plastics, pesticides and PBDEs: Endocrine disruption and developmental disabilities." *Journal of Developmental and Physical Disabilities* 20(2): 115-128.
- Charboneau, J. P. and S. M. Koger (2010). *FLAME RETARDANTS AND DEVELOPMENTAL DISABILITIES: A CAUSE FOR CONCERN*. Hauppauge, Nova Science Publishers, Inc.
- Chen, A., et al. (2011). "Developmental neurotoxicants in e-waste: an emerging health concern." *Environ Health Perspect* 119(4): 431-438.

- Chen, A., et al. (2011). Longitudinal study of exposure to PBDEs and PFCs and child neurobehavior. RePORTER Database National Institutes of Health.
- Chen, A., et al. (2012). Longitudinal study of exposure to PBDEs and PFCs and child neurobehavior. RePORTER Database National Institutes of Health.
- Chen, A., et al. (2013). Longitudinal study of exposure to PBDEs and PFCs and child neurobehavior. RePORTER Database National Institutes of Health.
- Chen, A., et al. (2013). Hydroxylated polybrominated diphenyl ethers in paired maternal and cord sera. *Environ Sci Technol.* 47: 3902-3908. [Environmental science & technology].
- Chen, B. Q., et al. (1999). "Novel synthesis of polyethers by the polyaddition of bis(epoxide)s with bis(phosphinate)s." *Journal of Polymer Science Part a-Polymer Chemistry* 37(7): 1009-1016.
- Chen, C.-m., et al. (2012). "Effects of CYP1A1 and GSTM1 gene polymorphisms and BPDE-DNA adducts on lung cancer." *Zhonghua Yixue Yichuanxue Zazhi* 29(1): 23-27.
- Chen, C. Y., et al. (2014). "Combination of photoreactor and packed bed bioreactor for the removal of ethyl violet from wastewater." *Chemosphere* 117: 494-501.
- Chen, D. H., et al. (2008). "Magnesium hydroxide nanoparticles with controlled morphologies via wet coprecipitation." *Materials Chemistry and Physics* 109(2-3): 224-229.
- Chen, J., et al. (2010). "Assessment of the neurotoxic mechanisms of decabrominated diphenyl ether (PBDE-209) in primary cultured neonatal rat hippocampal neurons includes alterations in second messenger signaling and oxidative stress." *Toxicol Lett* 192(3): 431-439.
- Chen, L., et al. (2012). "Acute exposure to DE-71: effects on locomotor behavior and developmental neurotoxicity in zebrafish larvae." *Environ Toxicol Chem* 31(10): 2338-2344.
- Chen, L., et al. (2013). "Acute exposure to DE-71 causes alterations in visual behavior in zebrafish larvae." *Environ Toxicol Chem* 32(6): 1370-1375.
- Chen, L., et al. (2012). "Prenatal transfer of polybrominated diphenyl ethers (PBDEs) results in developmental neurotoxicity in zebrafish larvae." *Environ Sci Technol* 46(17): 9727-9734.
- Chen, M. H., et al. (2013). Perfluorinated compound levels in cord blood and neurodevelopment at 2 years of age. *Epidemiology.* 24: 800-808. [Epidemiology (Cambridge, Mass.)].



- Chen, S. J., et al. (2010). "Response to "Comment on 'brominated flame retardants in children's toys: concentration, composition, and children's exposure and risk assessment'". " *Environmental Science and Technology* 44(3): 1154-1155.
- Chen, X., et al. (2012). "BDE-47 disrupts axonal growth and motor behavior in developing zebrafish." *Aquat Toxicol* 120-121: 35-44.
- Chen, Y., et al. (2012). "Polybrominated diphenyl ethers fate in China: A review with an emphasis on environmental contamination levels, human exposure and regulation." *Journal of Environmental Management* 113: 22-30.
- Chen, Y. H., et al. (2014). "Prenatal exposure to decabrominated diphenyl ether impairs learning ability by altering neural stem cell viability, apoptosis, and differentiation in rat hippocampus." *Hum Exp Toxicol*.
- Chen, Y. H. and Q. Wang (2007). "Reaction of melamine phosphate with pentaerythritol and its products for flame retardation of polypropylene." *Polymers for Advanced Technologies* 18(8): 587-600.
- Chen, Z. J., et al. (2014). "Polybrominated diphenyl ethers (PBDEs) in human samples of mother-newborn pairs in South China and their placental transfer characteristics." *Environ Int* 73: 77-84.
- Cheng, J., et al. (2009). "Neurobehavioural effects, redox responses and tissue distribution in rat offspring developmental exposure to BDE-99." *Chemosphere* 75(7): 963-968.
- Chenoweth, M. J., et al. (2014). Variation in P450 oxidoreductase (POR) A503V and flavin-containing monooxygenase (FMO)-3 E158K is associated with minor alterations in nicotine metabolism, but does not alter cigarette consumption. *Pharmacogenet Genomics*. 24: 172-176. [Pharmacogenetics and genomics].
- Cheslack-Postava, K., et al. (2013). "Maternal serum persistent organic pollutants in the Finnish Prenatal Study of Autism: A pilot study." *Neurotoxicol Teratol* 38: 1-5.
- Chevrier, J. (2013). "Invited commentary: Maternal plasma polybrominated diphenyl ethers and thyroid hormones--challenges and opportunities." *Am J Epidemiol* 178(5): 714-719.
- Chevrier, J., et al. (2010). "PBDE flame retardants and thyroid hormones: Chevrier et al. respond." *Environmental Health Perspectives* 118(12): A520-A521.
- Chey, H. and S. Buchanan (2008). "Toxins in Everyday Life." *Primary Care - Clinics in Office Practice* 35(4): 707-727.

- Chi, Y., et al. (2011). "Metabonomic phenotyping reveals an embryotoxicity of decabrominated diphenyl ether in mice." *Chem Res Toxicol* 24(11): 1976-1983.
- Chiang, W. Y. and C. H. Hu (1998). "Polymer blends with modified coupling agent. I. Preparation and thermal properties of LICA 44 grafted styrene maleic anhydride copolymer." *Journal of Applied Polymer Science* 68(1): 37-44.
- Chiu, C. Y., et al. (2014). "Low-dose benzo(a)pyrene and its epoxide metabolite inhibit myogenic differentiation in human skeletal muscle-derived progenitor cells." *Toxicological Sciences* 138(2): 344-353.
- Choi, D. K., et al. (2011). "Inhibitors of microglial neurotoxicity: Focus on natural products." *Molecules* 16(2): 1021-1043.
- Choi, G., et al. (2014). "Occurrences of major polybrominated diphenyl ethers (PBDEs) in maternal and fetal cord blood sera in Korea." *Sci Total Environ* 491-492: 219-226.
- Chou, C. T., et al. (2010). "Chronic exposure of 2,2',4,4'-tetrabromodiphenyl ether (PBDE-47) alters locomotion behavior in juvenile zebrafish (*Danio rerio*)." *Aquat Toxicol* 98(4): 388-395.
- Christiansen, P. and S. Wroe (2007). "Bite forces and evolutionary adaptations to feeding ecology in carnivores." *Ecology (Washington D C)* 88(2): 347-358.
- Chung, M. K., et al. (2013). "A sandwich ELISA for measuring benzo a pyrene-albumin adducts in human plasma." *Analytical Biochemistry* 435(2): 140-149.
- Chung, Y. C. and B. C. Chun (2010). **IMPACT OF INORGANIC PARTICLES ON THE POLYMER COMPOSITE AND ITS APPLICATION TO SPECIAL EFFECT.** Hauppauge, Nova Science Publishers, Inc.
- Cichy, B. and E. Kuzdzal (2014). "Obtaining Monodisperse Melamine Phosphate Grains by a Continuous Reaction Crystallization Process." *Industrial & Engineering Chemistry Research* 53(16): 6593-6599.
- Claus Henn, B., et al. (2014). Chemical mixtures and children's health. *Curr Opin Pediatr.* 26: 223-229. [Current opinion in pediatrics].
- Cleet, C. and A. Sjodin (2004). "U.S. PBDF levels: Effects in mice (multiple letters) [2]." *Environmental Health Perspectives* 112(17): A978-A979.
- Clement, P. (1993). "THE PHYLOGENY OF ROTIFERS - MOLECULAR, ULTRASTRUCTURAL AND BEHAVIORAL-DATA." *Hydrobiologia* 255: 527-544.
- Clement, P. (1993). "The phylogeny of rotifers: Molecular, ultrastructural and behavioural data." *Hydrobiologia* 255-256(0): 527-544.

Clement, P. and J. Amsellem (1989). "THE SKELETAL MUSCLES OF ROTIFERS AND THEIR INNERVATION." *Hydrobiologia* 186-187: 255-278.

Clement, R. E., et al. (2012). "Organohalogen contaminants of emerging concern in Great Lakes fish: a review." *Analytical and Bioanalytical Chemistry* 404(9): 2639-2658.

Coburn, C. G., et al. (2007). "Polybrominated diphenyl ethers and ortho-substituted polychlorinated biphenyls as neuroendocrine disruptors of vasopressin release: effects during physiological activation in vitro and structure-activity relationships." *Toxicol Sci* 98(1): 178-186.

Coburn, C. G., et al. (2008). "In vitro effects of environmentally relevant polybrominated diphenyl ether (PBDE) congeners on calcium buffering mechanisms in rat brain." *Neurochem Res* 33(2): 355-364.

Coburn, C. G., et al. (2007). "Polybrominated diphenyl ethers and ortho-substituted polychlorinated biphenyls as neuroendocrine disruptors of vasopressin release: Effects during physiological activation in vitro and structure-activity relationships." *Toxicological Sciences* 98(1): 178-186.

Cocco, E., et al. (2011). "Rapid analysis of polychlorinated biphenyls in fish by pressurised liquid extraction with in-cell cleanup and GC-MS." *International Journal of Environmental Analytical Chemistry* 91(4): 333-347.

Coleman King, S., et al. (2010). "Cancer worry (CW) in Atypical Mole Syndrome (AMS) patients utilizing Total Body Digital Photography(TBDP): Does previous history of melanoma (MM) matter?" *Journal of Investigative Dermatology* 130: S65.

Collins, J. (2012). Multiplexed Onchip Nanomagnetic Immunoassay for TOxin Reporting (MONITOR). RePORTER Database National Institutes of Health.

Colnot, T., et al. (2014). "Mammalian toxicology and human exposures to the flame retardant 2,2',6,6'-tetrabromo-4,4'-isopropylidenediphenol (TBBPA): Implications for risk assessment." *Archives of Toxicology* 88(3): 553-573.

Cong, Y., et al. (2014). "Identification of in vitro and in vivo metabolites of 12 beta-hydroxylveratroylzygadenine associated with neurotoxicity by using HPLC-MS/MS." *Chinese Chemical Letters* 25(8): 1107-1111.

Coppola, R. J. (1974). "An evaluation of 1-(4-methyl) 2, 5-dimethoxyphenyl-2-aminobutane (MDPA-1) as an enhancer of memory and learning." *J Am Osteopath Assoc* 73(5): 406-411.

Corbett, T. H., et al. (1975). "Toxicity of polybrominated biphenyls Firemaster BP-6 in rodents." *Environ Res* 10(3): 390-396.

- Cordeiro-Stone, M., et al. (1983). "Xeroderma Pigmentosum Variant and Normal Fibroblasts Show the Same Response to the Inhibition of DNA Replication by Benzo(a)pyrene-diol-epoxide-I." *Carcinogenesis* 7(10): 1783-1786.
- Cordeiro-Stone, M., et al. (1986). Xeroderma pigmentosum variant and normal fibroblasts show the same response to the inhibition of DNA replication by benzo[a]pyrene-diol-epoxide-I. *Carcinogenesis*. 7: 1783-1786. [*Carcinogenesis*].
- Cordner, A., et al. (2013). "Chemical regulation on fire: Rapid policy advances on flame retardants." *Environmental Science and Technology* 47(13): 7067-7076.
- Costa, F. R., et al. (2008). Layered double hydroxide based polymer nanocomposites. *Wax Crystal Control: Nanocomposites, Stimuli-Responsive Polymers*. Berlin, Springer-Verlag Berlin. 210: 101-168.
- Costa, L. G. (2013). Low level exposure to PBDEs: testing the hormetic and epigenetic hypotheses. *RePORTER Database National Institutes of Health*.
- Costa, L. G., et al. (2014). "A mechanistic view of polybrominated diphenyl ether (PBDE) developmental neurotoxicity." *Toxicol Lett* 230(2): 282-294.
- Costa, L. G. and G. Giordano (2007). "Developmental neurotoxicity of polybrominated diphenyl ether (PBDE) flame retardants." *Neurotoxicology* 28(6): 1047-1067.
- Costa, L. G. and G. Giordano (2011). "Is decabromodiphenyl ether (BDE-209) a developmental neurotoxicant?" *Neurotoxicology* 32(1): 9-24.
- Costa, L. G., et al. (2011). *In vitro* approaches to developmental neurotoxicity, Elsevier Academic Press Inc, 525 B Street, Suite 1900, San Diego, Ca 92101-4495 USA.
- Costa, L. G., et al. (2011). *In vitro* neurotoxicology: An introduction. 758: 1-9.
- Costa, L. G., et al. (2008). "Polybrominated diphenyl ether (PBDE) flame retardants: environmental contamination, human body burden and potential adverse health effects." *Acta Biomed* 79(3): 172-183.
- Costa, L. G., et al. (2010). "OXIDATIVE STRESS AS A POTENTIAL MECHANISM FOR DEVELOPMENTAL NEUROTOXICITY OF POLYBROMINATED DIPHENYLETHER (PBDE) FLAME RETARDANTS." *Flame Retardants: Functions, Properties and Safety*: 101-115.
- Costa, L. G., et al. (2015). "The brominated flame retardant BDE-47 causes oxidative stress and apoptotic cell death *in vitro* and *in vivo* in mice." *Neurotoxicology* 48: 68-76.

Costa-Malaquias, A., et al. (2014). Morphine protects against methylmercury intoxication: a role for opioid receptors in oxidative stress? PLoS One. 2014; 9(10):e110815. [PloS one].

Costlow, R. D., et al. (1983). "The effects on rat pups when nitrofen (4-(2,4-dichlorophenoxy)nitrobenzene) was applied dermally to the dam during organogenesis." Toxicology 28(1-2): 37-50.

Cottingham, K. (2010). "Flame retardants have different effects at high and low doses." J Proteome Res 9(3): 1193.

Couillard, C. M., et al. (2008). "Chemical-environment interactions affecting the risk of impacts on aquatic organisms: A review with a Canadian perspective - interactions affecting vulnerability." Environmental Reviews 16: 19-44.

Crain, C. M., et al. (2009). Understanding and managing human threats to the coastal marine environment. 1162: 39-62.

Cressey, M. A., et al. (2006). "Behavioral impairments produced by developmental exposure to the flame retardant decaBDE." Neurotoxicology and Teratology 28(6): 707-708.

Crofton, K. M., et al. (2005). Thyroid-hormone-disrupting chemicals: evidence for dose-dependent additivity or synergism. Environ Health Perspect. 113: 1549-1554. (Levesque et al.).

Cruickshanks, K. J., et al. (2011). "Vision and Cognitive Impairment: A Tale of Two Cohorts." ARVO Annual Meeting Abstract Search and Program Planner 2011: 2596.

Crump, D., et al. (2012). "Effects of tris(1,3-dichloro-2-propyl) phosphate and tris(1-chloropropyl) phosphate on cytotoxicity and mRNA expression in primary cultures of avian hepatocytes and neuronal cells." Toxicol Sci 126(1): 140-148.

Crump, D., et al. (2008). "Detection of PBDE effects on mRNA expression in chicken (*Gallus domesticus*) neuronal cells using real-time RT-PCR and a new differential display method." Toxicol In Vitro 22(5): 1337-1343.

Crump, D., et al. (2008). "Detection of Polybrominated Diphenyl Ethers in Herring Gull (*Larus argentatus*) brains: Effects on mRNA Expression in Cultured Neuronal Cells." Environmental Science & Technology 42(20): 7715-7721.

Cruz, R., et al. (2015). "Brominated flame retardants and seafood safety: A review." Environment International 77: 116-131.

Cube, R. V., et al. (2005). "3-(2-Ethoxy-4-{4-[3-hydroxy-2-methyl-4-(3-methylbutanoyl)phenoxy]butoxy}phenyl)propanoic acid: a brain penetrant allosteric

potentiator at the metabotropic glutamate receptor 2 (mGluR2)." *Bioorg Med Chem Lett* 15(9): 2389-2393.

Cui, C., et al. (2012). "Polybrominated diphenyl ethers exposure in breast milk in Shanghai, China: levels, influencing factors and potential health risk for infants." *Sci Total Environ* 433: 331-335.

Curran, C. P., et al. (2004). "Role Of The Aromatic Hydrocarbon Receptor (AHR) In Causing Neonatal Lethality In Mice Exposed To Coplanar Hexabromobiphenyl (cHBB)." *Toxicologist* 78(1-S): 245.

Curras-Collazo, M. C. (2011). "Nitric oxide signaling as a common target of organohalogen and other neuroendocrine disruptors." *J Toxicol Environ Health B Crit Rev* 14(5-7): 495-536.

Custer, T. W., et al. (2010). "Perfluorinated Compounds and Polybrominated Diphenyl Ethers in Great Blue Heron Eggs from Three Colonies on the Mississippi River, Minnesota." *Waterbirds* 33(1): 86-95.

Czerska, M., et al. (2013). "Effects of polybrominated diphenyl ethers on thyroid hormone, neurodevelopment and fertility in rodents and humans." *Int J Occup Med Environ Health* 26(4): 498-510.

Dabrowska-Bouta, B., et al. (2011). "The level of cytokines and features of inflammation in rat brain after oral exposure to polychlorinated biphenyls and brominated flame retardants." *Pharmacological Reports* 63(5): 1288.

Dach, K., et al. (2014). "Of mice and men: Mechanistic studies on the developmental neurotoxicity of polybrominated diphenyl ethers (PBDES) in a 3D in vitro model." *Toxicology Letters* 229: S118.

Daly, J. W., et al. (1980). "Fluoronorepinephrines: specific agonists for the activation of alpha and beta adrenergic-sensitive cyclic AMP-generating systems in brain slices." *J Pharmacol Exp Ther* 212(3): 382-389.

D'Amour, M., et al. (2013). "The Maternal-Infant Research on Environmental Chemicals Study-Overview of the biomonitoring component of a Canadian Pregnancy Cohort." *Toxicology Letters* 221: S255.

Damstra, T. (2007). "Potential effects of endocrine disrupting chemicals on the health of children." *European epi marker* Apr 11(2): 1-5.

Damstra, T., et al. (1982). "Toxicity of polybrominated biphenyls (PBBs) in Domestic and laboratory animals." *Environ Health Perspect* 44: 175-188.

- Daniels, J. L., et al. (2010). Individual characteristics associated with PBDE levels in U.S. human milk samples. *Environ Health Perspect.* 118: 155-160. (Levesque et al.).
- Darnerud, P. O. (2003). "Toxic effects of brominated flame retardants in man and in wildlife." *Environ Int* 29(6): 841-853.
- Darnerud, P. O., et al. (2007). "Plasma PBDE and thyroxine levels in rats exposed to Bromkal or BDE-47." *Chemosphere* 67(9): S386-392.
- Darnerud, P. O., et al. (2001). "Polybrominated diphenyl ethers: occurrence, dietary exposure, and toxicology." *Environ Health Perspect* 109 Suppl 1: 49-68.
- Darras, V. M. (2008). "Endocrine disrupting polyhalogenated organic pollutants interfere with thyroid hormone signalling in the developing brain." *Cerebellum* 7(1): 26-37.
- das Merces, N. N. A. and A. L. Erdman (2010). "Nursing and hematopoietic stem cell transplantation: scientific production from 1997 to 2007." *Acta Paulista De Enfermagem* 23(2): 271-277.
- Dashiff, A. and D. E. Kadouri (2011). "Predation of oral pathogens by *Bdellovibrio bacteriovorus* 109J." *Mol Oral Microbiol* 26(1): 19-34.
- Dassanayake, R. M., et al. (2009). Optimization of the matrix solid phase dispersion extraction procedure for the analysis of polybrominated diphenyl ethers in human placenta. *Anal Chem.* 81: 9795-9801. [Analytical chemistry].
- Daubie, S., et al. (2011). "Neurobehavioral and physiological effects of low doses of polybrominated diphenyl ether (PBDE)-99 in male adult rats." *Toxicol Lett* 204(1): 57-63.
- Dauwe, T., et al. (2005). "Feathers as a nondestructive biomonitor for persistent organic pollutants." *Environmental Toxicology and Chemistry* 24(2): 442-449.
- Davies, R. and E. Zou (2012). "Polybrominated diphenyl ethers disrupt molting in neonatal *Daphnia magna*." *Ecotoxicology* 21(5): 1371-1380.
- Davis, J. N., et al. (1978). "Brain alpha-adrenergic receptors: comparison of [3H]WB 4101 binding with norepinephrine-stimulated cyclic AMP accumulation in rat cerebral cortex." *Brain Res* 159(1): 125-135.
- de Campos, L. M. (2006). "A scoring function for learning Bayesian networks based on mutual information and conditional independence tests." *Journal of Machine Learning Research* 7: 2149-2187.

- de Cock, M., et al. (2012). "Does perinatal exposure to endocrine disruptors induce autism spectrum and attention deficit hyperactivity disorders? Review." *Acta Paediatr* 101(8): 811-818.
- De Coster, S. and N. van Larebeke (2012). "Endocrine-disrupting chemicals: associated disorders and mechanisms of action." *J Environ Public Health* 2012: 713696.
- De Guise, S., et al. (2001). "Consensus statement: Atlantic coast contaminants workshop 2000." *Environmental Health Perspectives* 109(12): 1301-1302.
- De Rosa, C. T. (2003). "Restoring the foundation: Tracking chemical exposures and human health." *Environmental Health Perspectives* 111(7): A374-A375.
- de Souza e Silva, P. T., et al. (2009). Potassium permanganate oxidation of phenanthrene and pyrene in contaminated soils. *J Hazard Mater.* 168: 1269-1273. [Journal of hazardous materials].
- de Souza, K. W., et al. (2011). "[Prevention strategies for testicular and penile cancer: an integrative review]." *Rev Esc Enferm USP* 45(1): 277-282.
- de Voogt, P. and B. van Hattum (2003). "Critical factors in exposure modeling of endocrine active substances." *Pure and Applied Chemistry* 75(11-12): 1933-1948.
- de Weger, V. A., et al. (2014). "Cellular and clinical pharmacology of the taxanes docetaxel and paclitaxel--a review." *Anticancer Drugs.* 25(5): 488-494. [Anti-cancer drugs].
- de Wit, C. A. (2002). "An overview of brominated flame retardants in the environment." *Chemosphere* 46(5): 583-624.
- Deacon, B. and J. Abramowitz (2006). Fear of needles and vasovagal reactions among phlebotomy patients. *J Anxiety Disord.* 2006; 20(7):946-60. [Journal of anxiety disorders].
- Decherf, S. and B. A. Demeneix (2011). "The obesogen hypothesis: A shift of focus from the periphery to the hypothalamus." *Journal of Toxicology and Environmental Health - Part B: Critical Reviews* 14(5-7): 423-448.
- Decherf, S., et al. (2010). "Disruption of thyroid hormone-dependent hypothalamic set-points by environmental contaminants." *Mol Cell Endocrinol* 323(2): 172-182.
- Degroote, S., et al. (2014). "Autistic-like traits in Lewis rats exposed perinatally to a mixture of common endocrine disruptors." *Endocrine Disruptors* 2(1).



Dehili, V. M., et al. (2013). "An Analysis of the Barkley Deficits in Executive Functioning Scale in a College Population: Does It Predict Symptoms of ADHD Better Than a Visual-Search Task?" *J Atten Disord*.

Deka, H. and N. Karak (2010). "Influence of highly branched poly(amido amine) on the properties of hyperbranched polyurethane/clay nanocomposites." *Materials Chemistry and Physics* 124(1): 120-128.

del Rio Paredes, S. (2005). "[Chemical contamination of the child: bioaccumulation and potential effects]." *Rev Esp Salud Publica* 79(2): 221-228.

Deli, M. A., et al. (2000). "Effects of N,N-diethyl-2-[4-(phenylmethyl)phenoxy]ethanamine on the blood-brain barrier permeability in the rat." *Eur J Pharmacol* 387(1): 63-72.

Delius, J. D. and M. Siemann (1998). "Transitive responding in animals and humans: Exaptation rather than adaptation?" *Behavioural Processes* 42(2-3): 107-137.

Dell'Osso, B. and T. A. Ketter (2013). "Assessing efficacy/effectiveness and safety/tolerability profiles of adjunctive pramipexole in bipolar depression: acute versus long-term data." *Int Clin Psychopharmacol*. 28(6): 297-304. [International clinical psychopharmacology].

Delonay, A. J., et al. (1993). "Sensitivity of early-life-stage golden trout to low pH and elevated aluminum." *Environmental Toxicology and Chemistry* 12(7): 1223-1232.

Deng, J., et al. (2009). "Hexabromocyclododecane-induced developmental toxicity and apoptosis in zebrafish embryos." *Aquatic Toxicology* 93(1): 29-36.

Denham, B. E. (2009). "Determinants of anabolic-androgenic steroid risk perceptions in youth populations: a multivariate analysis." *J Health Soc Behav*. 50(3): 277-292. [Journal of health and social behavior].

Denkins, B. A. (2005). "Are we really helping? The problem of dual diagnoses, homelessness, & hospital-hopping." *J Psychosoc Nurs Ment Health Serv*. 43(11): 48-50. [Journal of psychosocial nursing and mental health services].

Dever, S. M., et al. (2014). Differential expression of the alternatively spliced OPRM1 isoform  $\mu$ -opioid receptor-1K in HIV-infected individuals. *Aids*. 28: 19-30. [AIDS (London, England)].

Dew, B., et al. (2007). Social and environmental factors and their influence on drug use vulnerability and resiliency in rural populations. *J Rural Health*. 2007 (Fall); 23 Suppl:16-21. [The Journal of rural health : official journal of the American Rural Health Association and the National Rural Health Care Association].

Dewailly, E. r., et al. Exposition aux contaminants organiques et effets potentiels sur les fonctions thyroïdiennes chez la femme enceinte, le nouveau-né et l'adulte Thesis / Dissertation ETD.

DeWitt, J. C., et al. (2012). "Current Status of Developmental Immunotoxicity: Early-Life Patterns and Testing." *Toxicologic Pathology* 40(2): 230-236.

Di Giulio, R. (2008). Superfund Chemical Impact on Development. RePORTER Database National Institutes of Health.

Di Giulio, R. (2012). Project 1: Developmental neurotoxicants: sensitization, consequences and mechanis. RePORTER Database National Institutes of Health.

Di Giulio, R. (2012). Project 2: Thyroid Metabolism Disruption Key in Toxicant-Induced Developmental Im. RePORTER Database National Institutes of Health.

Di Giulio, R. (2012). Research Support Core: Core B: Analytical Chemistry. RePORTER Database National Institutes of Health.

Di Giulio, R. (2012). Superfund Research Center: Developmental Toxicants: Mechanisms, Consequences and. RePORTER Database National Institutes of Health.

Di Giulio, R. (2013). Project 1: Developmental neurotoxicants: sensitization, consequences and mechanis. RePORTER Database National Institutes of Health.

Di Giulio, R. (2013). Project 2: Thyroid Metabolism Disruption Key in Toxicant-Induced Developmental Im. RePORTER Database National Institutes of Health.

Di Giulio, R. (2013). Research Support Core: Core B: Analytical Chemistry. RePORTER Database National Institutes of Health.

Di Giulio, R. (2013). Superfund Research Center: Developmental Toxicants: Mechanisms, Consequences and. RePORTER Database National Institutes of Health.

Diamond, M. and S. Harrad (2009). *The Chemicals that will not Go Away: Implications for Human Exposure to Reservoirs of POPs. Persistent Organic Pollutants*, John Wiley & Sons, Ltd: 241-270.

Dietert, R. R., et al. (2011). "Environmental risk factors for autism." *Emerging Health Threats Journal* 4(1).

DiGangi, J., et al. (2010). "San Antonio Statement on brominated and chlorinated flame retardants." *Environ Health Perspect* 118(12): A516-518.

Dimandja, J.-M. D. (2004). Screening of Organohalogenated Toxicants in Breast Milk via GCxGC/TOF MS. RePORTER Database National Institutes of Health.

- Dingemans, M., et al. (2006). "Altered Synaptic Plasticity In C57BL/6 Mice After Neonatal Exposure To BDE-47." *Toxicol Sci* 90(1-S): 298.
- Dingemans, M. M., et al. (2008). "Hydroxylation increases the neurotoxic potential of BDE-47 to affect exocytosis and calcium homeostasis in PC12 cells." *Environ Health Perspect* 116(5): 637-643.
- Dingemans, M. M., et al. (2010). "Bromination pattern of hydroxylated metabolites of BDE-47 affects their potency to release calcium from intracellular stores in PC12 cells." *Environ Health Perspect* 118(4): 519-525.
- Dingemans, M. M., et al. (2009). "Hexabromocyclododecane inhibits depolarization-induced increase in intracellular calcium levels and neurotransmitter release in PC12 cells." *Toxicol Sci* 107(2): 490-497.
- Dingemans, M. M., et al. (2007). "Neonatal exposure to brominated flame retardant BDE-47 reduces long-term potentiation and postsynaptic protein levels in mouse hippocampus." *Environ Health Perspect* 115(6): 865-870.
- Dingemans, M. M., et al. (2011). "Neurotoxicity of brominated flame retardants: (in)direct effects of parent and hydroxylated polybrominated diphenyl ethers on the (developing) nervous system." *Environ Health Perspect* 119(7): 900-907.
- Dingemans, M. M. L., et al. (2010). "Calcium-related processes involved in the inhibition of depolarization-evoked calcium increase by hydroxylated PBDEs in PC12 cells." *Toxicological Sciences* 114(2): 302-309.
- Dingemans, M. M. L., et al. (2011). "Neurotoxicity of PBDEs: Dingemans et al. Respond." *Environmental Health Perspectives* 119(8): A331-A332.
- Dishaw, L. V., et al. (2014). "Developmental exposure to organophosphate flame retardants elicits overt toxicity and alters behavior in early life stage zebrafish (*Danio rerio*)." *Toxicol Sci* 142(2): 445-454.
- Dishaw, L. V., et al. (2014). "Exposures, mechanisms, and impacts of endocrine-active flame retardants." *Curr Opin Pharmacol* 19: 125-133.
- Dishaw, L. V., et al. (2011). "Is the PentaBDE replacement, tris (1,3-dichloro-2-propyl) phosphate (TDCPP), a developmental neurotoxicant? Studies in PC12 cells." *Toxicol Appl Pharmacol* 256(3): 281-289.
- Dodson, R. E., et al. (2014). "Urinary biomonitoring of phosphate flame retardants: levels in California adults and recommendations for future studies." *Environ Sci Technol* 48(23): 13625-13633.

Doe, J. E., et al. (2006). "A tiered approach to systemic toxicity testing for agricultural chemical safety assessment." *Critical Reviews in Toxicology* 36(1): 37-68.

Dols, A., et al. (2013). "The prevalence and management of side effects of lithium and anticonvulsants as mood stabilizers in bipolar disorder from a clinical perspective: a review." *Int Clin Psychopharmacol.* 28(6): 287-296. [International clinical psychopharmacology].

Domingo, J. L. (2012). "Polybrominated diphenyl ethers in food and human dietary exposure: A review of the recent scientific literature." *Food and Chemical Toxicology* 50(2): 238-249.

Donaldson, S. G., et al. (2010). "Environmental contaminants and human health in the Canadian Arctic." *Science of the Total Environment* 408(22): 5165-5234.

Donauer, S., et al. (2015). "Prenatal exposure to polybrominated diphenyl ethers and polyfluoroalkyl chemicals and infant neurobehavior." *J Pediatr* 166(3): 736-742.

Dong, W., et al. (2013). "Using whole mount in situ hybridization to examine thyroid hormone deiodinase expression in embryonic and larval zebrafish: a tool for examining OH-BDE toxicity to early life stages." *Aquat Toxicol* 132-133: 190-199.

Dooley, E. E. (2012). "The beat." *Environmental Health Perspectives* 120(9): A348-A349.

Dorne, J. L. C. M., et al. (2009). "Combining analytical techniques, exposure assessment and biological effects for risk assessment of chemicals in food." *TrAC - Trends in Analytical Chemistry* 28(6): 695-707.

Drago, A., et al. (2014). "Genome-wide association study supports the role of the immunological system and of the neurodevelopmental processes in response to haloperidol treatment." *Pharmacogenet Genomics.* 24(6): 314-319. [Pharmacogenetics and genomics].

Dreiem, A., et al. (2010). "Polychlorinated biphenyls and polybrominated diphenyl ethers alter striatal dopamine neurochemistry in synaptosomes from developing rats in an additive manner." *Toxicol Sci* 118(1): 150-159.

Driscoll, L. (2008). "Low-dose postnatal DE-71 exposure affects learning but not attention in rats." *Neurotoxicology and Teratology* 30(3): 258-259.

Driscoll, L. (2010). "Acute postnatal exposure to the pentaBDE commercial mixture DE-71 at low doses (5 or 15 mg/kg/day) does not produce learning or attention deficits in rats." *Neurotoxicology and Teratology* 32(4): 507.

Driscoll, L. L. (2007). "Neural effects of polybrominated diphenyl ethers (PBDEs): links to behavioral effects and parallels with PCB exposure." *Neurotoxicology and Teratology* 29(3): 412-413.

Driscoll, L. L., et al. (2010). "Levothyroxine supplementation to attenuate neurobehavioral effects of exposure to polybrominated diphenyl ethers in rats." *Society for Neuroscience Abstract Viewer and Itinerary Planner* 40.

Driscoll, L. L., et al. (2006). "Chronic postnatal DE-71 exposure: suppression of serum thyroxine (T4), but no effects on learning, attention, or cholinergic challenge." *Neurotoxicology and Teratology* 28(3): 419-420.

Driscoll, L. L., et al. (2009). "Chronic postnatal DE-71 exposure: effects on learning, attention and thyroxine levels." *Neurotoxicol Teratol* 31(2): 76-84.

Driscoll, L. L., et al. (2011). "Testing the hypothyroidism hypothesis of the neurotoxic effects of polybrominated diphenyl ethers in early postnatal development." *Society for Neuroscience Abstract Viewer and Itinerary Planner* 41.

Driscoll, L. L., et al. (2012). "Acute postnatal exposure to the pentaBDE commercial mixture DE-71 at 5 or 15 mg/kg/day does not produce learning or attention deficits in rats." *Neurotoxicol Teratol* 34(1): 20-26.

Du, M., et al. (2012). "Advance in Researches on Toxicology of Brominated Flame Retardants." *Asian Journal of Ecotoxicology* 7(6): 575-584.

Dubovicky, M. (2010). "Neurobehavioral manifestations of developmental impairment of the brain." *Interdisciplinary Toxicology* 3(2): 59-67.

Dufault, C., et al. (2005). "Brief postnatal PBDE exposure alters learning and the cholinergic modulation of attention in rats." *Toxicol Sci* 88(1): 172-180.

Dufault, C., et al. (2005). "Early postnatal exposure to DE-71 produces lasting effects on learning in a visual discrimination task." *Neurotoxicol Teratol* 27(3): 381.

Dunaway, K., et al. (2013). "A bioinformatic approach to determine the effect of organic pollutants on the genome and epigenome." *Environmental and Molecular Mutagenesis* 54: S24.

Dunnick, J. K., et al. (1984). "REPRODUCTIVE TOXICITY OF DI METHYL METHYL PHOSPHONATE IN THE MALE FISCHER 344 RAT." *Toxicology and Applied Pharmacology* 72(3): 379-387.

Dunnick, J. K., et al. (1984). "Reproductive toxicity of dimethyl methyl phosphonate (DMMP) in the male Fischer 344 rat." *Toxicol Appl Pharmacol* 72(3): 379-387.

Durst, H. I., et al. (1977). "EFFECTS OF POLY BROMINATED BI PHENYLS ON HEALTH AND PERFORMANCE OF PREGNANT HOLSTEIN HEIFERS." *Journal of Dairy Science* 60(8): 1294-1300.

Eckley, N. and H. Selin (2004). "All talk, little action: precaution and European chemicals regulation." *Journal of European Public Policy* 11(1): 78-105.

Egorov, A. I., et al. (2013). "Biomonitoring-based environmental public health indicators." *Methods Mol Biol* 930: 275-293.

Eisenreich, K. M. and C. L. Rowe (2014). "DIETARY EXPOSURE OF BDE-47 AND BDE-99 AND EFFECTS ON BEHAVIOR, BIOENERGETICS, AND THYROID FUNCTION IN JUVENILE RED-EARED SLIDERS (*TRACHEMYS SCRIPTA ELEGANS*) AND COMMON SNAPPING TURTLES (*CHELYDRA SERPENTINA*)." *Environmental Toxicology and Chemistry* 33(12): 2810-2817.

Ela, W. P., et al. (2011). "Toward identifying the next generation of superfund and hazardous waste site contaminants." *Environmental Health Perspectives* 119(1): 6-10.

El-Hage, N., et al. (2014). Ibudilast (AV411), and its AV1013 analog, reduce HIV-1 replication and neuronal death induced by HIV-1 and morphine. *Aids*. 28: 1409-1419. [AIDS (London, England)].

Ellis-Hutchings, R. G., et al. (2004). "Effects of Polybrominated Diphenyl Ether (PBDE) Exposure on Biochemical Indicators of Nervous System Development." *Birth Defects Res Part A Clin Mol Teratol* 70(5): 320.

Ema, M., et al. (2008). "Two-generation reproductive toxicity study of the flame retardant hexabromocyclododecane in rats." *Reprod Toxicol* 25(3): 335-351.

Emlen, D. J. and T. K. Philips (2006). "Phylogenetic evidence for an association between tunneling behavior and the evolution of horns in dung beetles (Coleoptera : Scarabaeidae : Scarabaeinae)." *Coleopterists Society Monographs Patricia Vaurie Series*(5): 47-56.

Emond, C., et al. (2010). "A physiologically based pharmacokinetic model for developmental exposure to BDE-47 in rats." *Toxicol Appl Pharmacol* 242(3): 290-298.

Emond, C., et al. (2013). Proposed mechanistic description of dose-dependent BDE-47 urinary elimination in mice using a physiologically based pharmacokinetic model. *Toxicol Appl Pharmacol*. 273: 335-344. [Toxicology and applied pharmacology].

Eng, M. L., et al. (2012). "Early exposure to 2,2',4,4',5-pentabromodiphenyl ether (BDE-99) affects mating behavior of zebra finches." *Toxicol Sci* 127(1): 269-276.

Eng, M. L., et al. (2014). "An assessment of the developmental toxicity of BDE-99 in the European starling using an integrated laboratory and field approach." *Ecotoxicology* 23(8): 1505-1516.

Eng, M. L., et al. (2010). "Effects of early exposure to a brominated flame retardant (PBDE-99) on physiology and behaviour in zebra finches." *Integrative and Comparative Biology* 50(Suppl. 1): E51.

Eriksson, P. (2008). "Developmental neurotoxicity in neonatal mice following coexposure to PCB 153 and methyl mercury: Interaction or false positive? - Reply to the letter to the editor." *Toxicology* 248(2-3): 162-163.

Eriksson, P. (2008). "Letter to the Editor." *Toxicology* 248(2-3): 162-163.

Eriksson, P. (2008). "Response to: Use of the pup as the statistical unit in developmental neurotoxicity studies: Overlooked model or poor research design?" *Toxicological Sciences* 103(2): 411-413.

Eriksson, P., et al. (2001). "The developing cholinergic system as target for environmental toxicants, nicotine and polychlorinated biphenyls (PCBs): implications for neurotoxicological processes in mice." *Neurotox Res* 3(1): 37-51.

Eriksson, P., et al. (2001). "Neonatal exposure to toxicants: defined critical period: altered adult susceptibility." *Neurotoxicology* 22(4): 510.

Eriksson, P., et al. (2006). "Polybrominated diphenyl ethers, a group of brominated flame retardants, can interact with polychlorinated biphenyls in enhancing developmental neurobehavioral defects." *Toxicol Sci* 94(2): 302-309.

Eriksson, P., et al. (2003). "Interaction between a brominated flame-retardant (PBDE 99) and an Ortho-substituted PCB (PCB 52) enhances developmental neurotoxic effects." *Toxicological Sciences* 72(S-1): 323-324.

Eriksson, P., et al. (2006). "Impaired behaviour, learning and memory, in adult mice neonatally exposed to hexabromocyclododecane (HBCDD)." *Environ Toxicol Pharmacol* 21(3): 317-322.

Eriksson, P., et al. (2001). "Brominated flame retardants: a novel class of developmental neurotoxicants in our environment?" *Environ Health Perspect* 109(9): 903-908.

Eriksson, P. and H. Viberg (2004). "Untitled - Reply." *Toxicological Sciences* 79(1): 207-208.

Eriksson, P., et al. (2002). "A brominated flame retardant, 2,2',4,4',5-pentabromodiphenyl ether: uptake, retention, and induction of neurobehavioral alterations in mice during a critical phase of neonatal brain development." *Toxicol Sci* 67(1): 98-103.

Eriksson, P., et al. (2005). "Developmental Toxicology In The Neonatal Mouse: The Use Of Randomly Selected Individuals As Statistical Unit Compared To The Litter In Mice Neonatally Exposed To Pbde 99." *Toxicol Sci* 84(1-S): 219-220.

Ernst, H. (1995). "Endogenous circatidal activity rhythm in a littoral mite, *Bdella septentrionalis* (Acarina, Bdellidae)." *Acarologia (Paris)* 36(4): 315-324.

Eroglu, D., et al. (2010). "Electrochemical Synthesis of Poly(methylsilyne) and Investigation of the Effects of Parameters on the Synthesis." *Journal of Applied Polymer Science* 118(5): 3049-3057.

Ertenli, I., et al. (2012). "Infliximab, a TNF-alpha antagonist treatment in patients with ankylosing spondylitis: the impact on depression, anxiety and quality of life level." *Rheumatology International* 32(2): 323-330.

Esa, A. E. H., et al. (1988). "IMMUNOTOXICITY OF ORGANOPHOSPHORUS COMPOUNDS MODULATION OF CELL-MEDIATED IMMUNE RESPONSES BY INHIBITION OF MONOCYTE ACCESSORY FUNCTIONS." *Clinical Immunology and Immunopathology* 49(1): 41-52.

Eskenazi, B. (2009). Center for Children's Environmental Health Research. RePORTER Database National Institutes of Health.

Etminani, K., et al. (2013). "Effective pruning strategies for branch and bound Bayesian networks structure learning from data." *Scientia Iranica* 20(3): 682-694.

Eubig, P. A. (2009). Effects of PCBs and PBDEs on Three Distinct Components of Response Inhibition. RePORTER Database National Institutes of Health.

Eubig, P. A. (2010). Effects of PCBs and PBDEs on Three Distinct Components of Response Inhibition. RePORTER Database National Institutes of Health.

Eubig, P. A. (2011). Effects of PCBs and PBDEs on Three Distinct Components of Response Inhibition. RePORTER Database National Institutes of Health.

Eubig, P. A. (2012). Effects of PCBs and PBDEs on Three Distinct Components of Response Inhibition. RePORTER Database National Institutes of Health.

Eubig, P. A. (2013). Effects of PCBs and PBDEs on Three Distinct Components of Response Inhibition. RePORTER Database National Institutes of Health.

Eubig, P. A., et al. (2010). "Lead and PCBs as risk factors for attention deficit/hyperactivity disorder." *Environmental Health Perspectives* 118(12): 1654-1667.



- Eubig, P. A., et al. (2011). "Adhd, lead, and pcbs: Eubig et al. respond." *Environmental Health Perspectives* 119(7): A282.
- Eum, S. Y., et al. (2013). "EXPOSURE TO FLAME RETARDANT BDE-47 INDUCES OCCLUDIN DISRUPTION AND VCAM-1 EXPRESSION IN HUMAN BRAIN ENDOTHELIAL CELLS." *Journal of Neuroimmune Pharmacology* 8(2): 416.
- Evans, C. S. and B. Dellinger (2003). "Mechanisms of dioxin formation from the high-temperature pyrolysis of 2-bromophenol." *Environ Sci Technol* 37(24): 5574-5580.
- Evans, C. S. and B. Dellinger (2005). "Formation of bromochlorodibenzo-p-dioxins and furans from the high-temperature pyrolysis of a 2-chlorophenol/2-bromophenol mixture." *Environmental Science & Technology* 39(20): 7940-7948.
- Evans, C. S. and B. Dellinger (2005). "Mechanisms of dioxin formation from the high-temperature oxidation of 2-bromophenol." *Environmental Science & Technology* 39(7): 2128-2134.
- Evans, C. S. and B. Dellinger (2006). "Formation of bromochlorodibenzo-p-dioxins and dibenzofurans from the high-temperature oxidation of a mixture of 2-chlorophenol and 2-bromophenol." *Environmental Science & Technology* 40(9): 3036-3042.
- Everts, S., et al. (2008). "Inadvertent contamination." *Chemical & Engineering News* 86(5): 6-6.
- Faass, O., et al. (2013). "Developmental effects of perinatal exposure to PBDE and PCB on gene expression in sexually dimorphic rat brain regions and female sexual behavior." *Gen Comp Endocrinol* 188: 232-241.
- Falco, G., et al. (2005). "Health risks of dietary intake of environmental pollutants by elite sportsmen and sportswomen." *Food Chem Toxicol* 43(12): 1713-1721.
- Falcon, H., et al. (2010). "Liquid-phase oxidation of p-xylene using N-hydroxyimides." *Catalysis Communications* 12(1): 5-8.
- Fan, C. Y., et al. (2010). "Changes in mitogen-activated protein kinase in cerebellar granule neurons by polybrominated diphenyl ethers and polychlorinated biphenyls." *Toxicol Appl Pharmacol* 245(1): 1-8.
- Fan, H., et al. (2011). "Room temperature synthesis of zinc hydroxystannate hollow core-shell microspheres and their hydrothermal growth of hollow core-shell polyhedral microcrystals." *Crystengcomm* 13(1): 113-117.
- Faniband, M., et al. (2014). "Human biological monitoring of suspected endocrine-disrupting compounds." *Asian J Androl.* 16(1): 5-16. [Asian journal of andrology].

Farcy, E., et al. (2013). "An integrated environmental approach to investigate biomarker fluctuations in the blue mussel *Mytilus edulis* L. in the Vilaine estuary, France." *Environmental Science and Pollution Research International* 20(2): 630-650.

Farhat, A., et al. (2013). "In Ovo effects of two organophosphate flame retardants--TCPP and TDCPP--on pipping success, development, mRNA expression, and thyroid hormone levels in chicken embryos." *Toxicol Sci* 134(1): 92-102.

Fatemi, S. M. and M. Foroutan (2014). "Study of the dynamic behavior of boron nitride nanotube (BNNT) and triton surfactant complexes using molecular dynamics simulations." *Advanced Science, Engineering and Medicine* 6(5): 583-590.

Fawell, J. and C. N. Ong (2012). "Emerging Contaminants and the Implications for Drinking Water." *International Journal of Water Resources Development* 28(2): 247-263.

Feldman, B. (2013). *Gene Function, Expression and Regulation in Zebrafish*. RePORTER Database National Institutes of Health.

Felician, O., et al. (2011). "Attentional disorders in a 71-year-old man." *Pratique Neurologique - FMC* 2(4): 215-228.

Feng, Y., et al. (2015). "Simulating long-term occupational exposure to decabrominated diphenyl ether using C57BL/6 mice: Biodistribution and pathology." *Chemosphere* 128: 118-124.

Feo, M. L., et al. (2013). "Development of a liquid chromatography-electrospray chemical ionization tandem mass spectrometry analytical method for analysis of eleven hydroxylated polybrominated diphenyl ethers." *J Chromatogr A* 1301: 80-87.

Feo, M. L., et al. (2014). "Advanced UV/H<sub>2</sub>O<sub>2</sub> oxidation of deca-bromo diphenyl ether in sediments." *Sci Total Environ* 479-480: 17-20.

Feo, M. L., et al. (2013). "Biotransformation of BDE-47 to potentially toxic metabolites is predominantly mediated by human CYP2B6." *Environ Health Perspect* 121(4): 440-446.

Fernandes, E. C. A., et al. (2010). "Activation and Potentiation of Human GABA(A) Receptors by Non-Dioxin-Like PCBs Depends on Chlorination Pattern." *Toxicological Sciences* 118(1): 183-190.

Fernandes, J. D. and L. C. Reboucas (2013). "[A decade of National Curriculum Guidelines for Graduation in Nursing: advances and challenges]." *Rev Bras Enferm* 66 Spec: 95-101.

- Fernie, K., et al. (2010). "The effects of brominated flame retardants on reproductive behaviour and physiology of American kestrels: conservation implications." Canadian Technical Report of Fisheries and Aquatic Sciences 2883: 124-125.
- Fernie, K. J., et al. (2005). "Evidence of immunomodulation in nestling American kestrels (*Falco sparverius*) exposed to environmentally relevant PBDEs." *Environmental Pollution* 138(3): 486-494.
- Fernie, K. J., et al. (2008). "Changes in reproductive courtship behaviors of adult American kestrels (*Falco sparverius*) exposed to environmentally relevant levels of the polybrominated diphenyl ether mixture, DE-71." *Toxicol Sci* 102(1): 171-178.
- Ferrari, E., et al. (2014). "Curcumin derivatives as metal-chelating agents with potential multifunctional activity for pharmaceutical applications." *Journal of Inorganic Biochemistry* 139: 38-48.
- Field, J. M., et al. (2003). "A yeast reporter system for PAH mutagenesis of p53 in mammalian cells." *Proceedings of the American Association for Cancer Research Annual Meeting* 44: 1053-1054.
- Fields, S. (2005). "Great Lakes: Resource at risk." *Environmental Health Perspectives* 113(3): A164-A173.
- Fingas, C. D., et al. (2012). "Myofibroblast-derived PDGF-BB promotes hedgehog survival signaling in cholangiocarcinoma cells." *Langenbeck's Archives of Surgery* 397(4): 659-660.
- Fini, J. B., et al. (2012). "Thyroid hormone signaling in the *Xenopus laevis* embryo is functional and susceptible to endocrine disruption." *Endocrinology* 153(10): 5068-5081.
- Fischer, C., et al. (2006). "Enhanced Developmental Neurobehavioral Defects In Mice Neonatally Co-Exposed To An Ortho-Substituted PCB (PCB 153), Co-Planar PCB (PCB 126), Or A Brominated Flame Retardant (PBDE 99) In Addition To Methylmercury." *Toxicol Sci* 90(1-S): 297.
- Fischer, C., et al. (2008). "Coexposure of neonatal mice to a flame retardant PBDE 99 (2,2',4,4',5-pentabromodiphenyl ether) and methyl mercury enhances developmental neurotoxic defects." *Toxicol Sci* 101(2): 275-285.
- Fischer, C., et al. (2008). "Neonatal co-exposure to low doses of an ortho-PCB (PCB 153) and methyl mercury exacerbate defective developmental neurobehavior in mice." *Toxicology* 244(2-3): 157-165.
- Fitzgerald, E., et al. (2008). "Neuropsychological effects of exposure to PBDEs." *American Journal of Epidemiology* 167(11, Suppl. S): S104.

Fitzgerald, E. F. (2004). Neuropsychological and Thyroid Effects of PBDEs. RePORTER Database National Institutes of Health.

Fitzgerald, E. F. (2009). Neuropsychological & Thyroid Effects of Perfluorinated Compounds in Older Adults. RePORTER Database National Institutes of Health.

Fitzgerald, E. F., et al. (2012). "Polybrominated diphenyl ethers (PBDEs), polychlorinated biphenyls (PCBs) and neuropsychological status among older adults in New York." *Neurotoxicology* 33(1): 8-15.

Flamm, E. G. (2013). "Neonatal animal testing paradigms and their suitability for testing infant formula." *Toxicology Mechanisms and Methods* 23(2): 57-67.

Fonnum, F. and E. Mariussen (2009). "Mechanisms involved in the neurotoxic effects of environmental toxicants such as polychlorinated biphenyls and brominated flame retardants." *J Neurochem* 111(6): 1327-1347.

Fonnum, F., et al. (2006). "Molecular mechanisms involved in the toxic effects of polychlorinated biphenyls (PCBs) and brominated flame retardants (BFRs)." *J Toxicol Environ Health A* 69(1-2): 21-35.

Foran, J. A., et al. (2005). Risk-based consumption advice for farmed Atlantic and wild Pacific salmon contaminated with dioxins and dioxin-like compounds. *Environ Health Perspect.* 113: 552-556. (Levesque et al.).

Fossi, M. C., et al. (2014). "Could feeding habit and migratory behaviour be the causes of different toxicological hazard to cetaceans of Gulf of California (Mexico)?" *Environmental Science and Pollution Research International* 21(23): 13353-13366.

Franceschetti, A., et al. (2013). "Variations in treatment patterns and disease severity among patients with psoriasis receiving their first biologic in European union." *Journal of the European Academy of Dermatology and Venereology* 27: 66.

Fraser, A. J., et al. (2009). "Diet contributes significantly to the body burden of PBDEs in the general U.S. population." *Environmental Health Perspectives* 117(10): 1520-1525.

Frazzoli, C., et al. (2010). "Diagnostic health risk assessment of electronic waste on the general population in developing countries' scenarios." *Environmental Impact Assessment Review* 30(6): 388-399.

Frederiksen, M., et al. (2010). "Polybrominated diphenyl ethers in paired samples of maternal and umbilical cord blood plasma and associations with house dust in a Danish cohort." *Int J Hyg Environ Health* 213(4): 233-242.

Frederiksen, M., et al. (2010). "Placental transfer of the polybrominated diphenyl ethers BDE-47, BDE-99 and BDE-209 in a human placenta perfusion system: an experimental study." *Environ Health* 9: 32.

French Society Of, T. (1997). "Annual Meeting of the French Society of Toxicology, Meeting on Toxic Injury and Cancer: Molecular and Epidemiological Aspects, Paris, France, November 19-20, 1996." *Human & Experimental Toxicology* 16(9): 525-551.

Fresan, A., et al. (2011). "Demographic and clinical features related to benzodiazepine dependence in psychiatric patients." *Salud Mental* 34(2): 103-109.

Freudenthal, R. I., et al. (2001). "A subchronic toxicity study of phosflex 51B in Sprague-Dawley rats." *International Journal of Toxicology* 20(5): 269-274.

Freudenthal, R. I. and R. T. Henrich (1999). "A subchronic toxicity study of Fyrol PCF in Sprague-Dawley rats." *International Journal of Toxicology* 18(3): 173-176.

Fritsche, E. (2012). "Human neurospheres as 3D cellular systems for developmental neurotoxicity testing." *Toxicology Letters* 211: S8.

Fritsche, E. (2012). "In vitro assessment of developmental neurotoxicity by using 3D cultures: Species can make a difference." *ATLA Alternatives to Laboratory Animals* 40(4): A7-A8.

Fritsche, E., et al. (2010). "Human neurospheres as three-dimensional cellular systems for developmental neurotoxicity testing." *Toxicology Letters* 196: S22-S23.

Frye, G. D., et al. (1980). "An evaluation of the selectivity of fenmetozole (DH-524) reversal of ethanol-induced changes in central nervous system function." *Psychopharmacology (Berl)* 69(2): 149-155.

Fu, J., et al. (2013). "Toxicogenomic responses of zebrafish embryos/larvae to tris(1,3-dichloro-2-propyl) phosphate (TDCPP) reveal possible molecular mechanisms of developmental toxicity." *Environmental Science and Technology* 47(18): 10574-10582.

Fuentes, J. A. and N. H. Neff (1975). "Selective monoamine oxidase inhibitor drugs as aids in evaluating the role of type A and B enzymes." *Neuropharmacology* 14(11): 819-825.

Fujimoto, H., et al. (2011). "Impaired oligodendroglial development by decabromodiphenyl ether in rat offspring after maternal exposure from mid-gestation through lactation." *Reprod Toxicol* 31(1): 86-94.

Fujimoto, H., et al. (2013). "Increased cellular distribution of vimentin and ret in the cingulum of rat offspring after developmental exposure to decabromodiphenyl ether or

1,2,5,6,9,10-hexabromocyclododecane." *Journal of Toxicologic Pathology* 26(2): 119-129.

Fuller, R. W. and S. K. Hemrick (1978). "Selective in vivo inhibition of monoamine oxidase in rat tissues by N-[2-(O-chlorophenoxy)-ethyl]-cyclopropylamine." *Proc Soc Exp Biol Med* 158(3): 323-325.

Fuller, R. W. and K. W. Perry (1977). "Further studies on the effects of N-cyclopropyl-p-chloroamphetamine in rat brain." *Neuropharmacology* 16(7-8): 495-497.

Fuller, R. W. and K. W. Perry (1977). "Increase of pineal noradrenaline concentration in rats by desipramine but not fluoxetine: implications concerning the specificity of these uptake inhibitors." *J Pharm Pharmacol* 29(11): 710-711.

Fuller, R. W. and H. D. Snoddy (1977). "Elevation of plasma corticosterone by swim stress and insulin-induced hypoglycemia in control and fluoxetine-pretreated rats." *Endocr Res Commun* 4(1): 11-23.

Fuller, R. W. and D. T. Wong (1977). "Inhibition of serotonin reuptake." *Fed Proc* 36(8): 2154-2158.

Funk, M., et al. (1997). "Critical parameters for adduct formation of the carcinogen (+)-anti-benzo[a]pyrene-7,8-dihydrodiol 9,10-epoxide with oligonucleotides." *Bioconjug Chem* 8(3): 310-317.

Ganser, L. R. (2006). "The effects of PBDE 209 on laryngeal structures in *Xenopus tropicalis*." *Integrative and Comparative Biology* 46(Suppl. 1): E194.

Gant, D. B., et al. (1987). "Action of organophosphates on GABAA receptor and voltage-dependent chloride channels." *Fundam Appl Toxicol* 9(4): 698-704.

Gao, Q., et al. (2015). "Synthesis of Novel Dipyrimidinone Diphenyl Ethers." *Chemical Journal of Chinese Universities-Chinese* 36(1): 93-101.

Gao, Y. Y., et al. (2008). "Influence of magnesium source on the crystallization behaviors of magnesium hydroxide." *Journal of Crystal Growth* 310(16): 3771-3778.

Gao, Z. Q., et al. (2007). Character and application of fire retardants of ammonium polyphosphates with high degree polymerization. Warrington, Emas Publ Ltd.

Garcia-Reyero, N., et al. (2014). "Effects of BDE-209 contaminated sediments on zebrafish development and potential implications to human health." *Environ Int* 63: 216-223.

Garner, R. C., et al. (1988). "IMMUNOASSAY PROCEDURES TO DETECT EXPOSURE TO AFLATOXIN B-1 AND BENZO-A-PYRENE IN ANIMALS AND

MAN AT THE DNA LEVEL." *International Archives of Occupational and Environmental Health* 60(3): 145-150.

Garrido, M., et al. (2007). "Validation of the concentration profiles obtained from the near infrared/multivariate curve resolution monitoring of reactions of epoxy resins using high performance liquid chromatography as a reference method." *Anal Chim Acta* 585(2): 277-285.

Gassmann, K., et al. (2014). "BDE-47 and 6-OH-BDE-47 modulate calcium homeostasis in primary fetal human neural progenitor cells via ryanodine receptor-independent mechanisms." *Arch Toxicol* 88(8): 1537-1548.

Gavrilova, G. V., et al. (2013). "Bromination of 6-Dibromomethyl-6-methylcyclohexyl-2,4-dien-1-one." *Russian Journal of General Chemistry* 83(10): 1844-1852.

Gee, J., et al. (2008). "Acute Developmental Exposure to Polybrominated Diphenyl Ether 47 (PBDE 47) alters dopamine concentration within the brain of male mice." *Neurotoxicology and Teratology* 30(3): 258.

Gee, J. R., et al. (2008). "Lack of alterations in thyroid hormones following exposure to polybrominated diphenyl ether 47 during a period of rapid brain development in mice." *Drug Chem Toxicol* 31(2): 245-254.

Gee, J. R. and V. C. Moser (2007). "Developmental evaluations of C57BL/6 mice exposed to 2,2',4,4'-brominated diphenyl ether (DE47) on postnatal day 10." *Neurotoxicology and Teratology* 29(5): 589.

Gee, J. R. and V. C. Moser (2008). "Acute postnatal exposure to brominated diphenylether 47 delays neuromotor ontogeny and alters motor activity in mice." *Neurotoxicol Teratol* 30(2): 79-87.

Gee, J. R., et al. (2011). "Neurochemical changes following a single dose of polybrominated diphenyl ether 47 in mice." *Drug Chem Toxicol* 34(2): 213-219.

Geeraerts, C. and C. Belpaire (2010). "The effects of contaminants in European eel: A review." *Ecotoxicology* 19(2): 239-266.

Geller, I., et al. (1985). "Behavioral effects of drugs as a function of maternal polybrominated biphenyl body burden." *Toxicol Lett* 24: 229-234.

Geller, I., et al. (1979). "Effects of polybrominated biphenyl on a discrimination task in rats." *Neurobehavioral Toxicology and Teratology* 1(4): 263-267.

Gendelman, H. E. and H. A. Gelbard (2014). Adjunctive and long-acting nanoformulated antiretroviral therapies for HIV-associated neurocognitive disorders. *Curr Opin HIV AIDS*. 9: 585-590. [Current opinion in HIV and AIDS].

Genuis, S. J. and K. L. Kelln (2015). "Toxicant exposure and bioaccumulation: a common and potentially reversible cause of cognitive dysfunction and dementia." *Behav Neurol* 2015: 620143.

Gerzina, T. M., et al. (2003). "Student use and perceptions of different learning aids in a problem-based learning (PBL) dentistry course." *J Dent Educ* 67(6): 641-653.

Getahun, D. and M. R. Peltier (2013). Flame Retardant and Adverse Perinatal Outcome (FRAPO). RePORTER Database National Institutes of Health.

Ghanem, R. and F. A. Delmani (2012). "Kinetics of thermal and photolytic degradation of decabromodiphenyl ether (BDE 209) in backcoated textile samples." *Journal of Analytical and Applied Pyrolysis* 98: 79-85.

Ghisari, M. and E. C. Bonfeld-Jorgensen (2005). "Impact of environmental chemicals on the thyroid hormone function in pituitary rat GH3 cells." *Mol Cell Endocrinol* 244(1-2): 31-41.

Giera, S., et al. (2011). "Individual Polychlorinated Biphenyl (PCB) Congeners Produce Tissue- and Gene-Specific Effects on Thyroid Hormone Signaling during Development." *Endocrinology* 152(7): 2909-2919.

Gieron-Korthals, M. A., et al. (1994). "Expanding spectrum of cocaine induced central nervous system malformations." *Brain & Development* 16(3): 253-256.

Gilbert, M. E. and K. M. Crofton (2002). "Developmental exposure to polybrominated diphenyl ethers does not alter synaptic transmission or LTP in hippocampus." *Toxicologist* 66(1-S): 132.

Gilbert, M. E., et al. (2012). "Developmental thyroid hormone disruption: prevalence, environmental contaminants and neurodevelopmental consequences." *Neurotoxicology* 33(4): 842-852.

Gilbert, M. E., et al. (2004). "Developmental Exposure To Polybrominated Diphenyl Ethers Impairs Synaptic Transmission And LTP In Hippocampus." *Toxicologist* 78(1-S): 394.

Gilbert, S. and E. Miller (2009). "Scientific consensus statement on environmental agents associated with neurodevelopmental disorders." *Birth Defects Research Part A - Clinical and Molecular Teratology* 85(5): 406.

Gilbert, S. and E. Miller (2009). "Scientific consensus statement on environmental agents associated with neurodevelopmental disorders." *Neurotoxicology and Teratology* 31(4): 241-242.



- Gilbert, S. G. (2004). "Ethical, legal, and social implications of neurobehavioral teratology." *Neurotoxicology and Teratology* 26(3): 502-503.
- Gilbert, S. G. (2004). "Ethical, legal, and social implications of neurobehavioral teratology." *Birth Defects Res Part A Clin Mol Teratol* 70(5): 341-342.
- Gill, U., et al. (2004). "Polybrominated diphenyl ethers: human tissue levels and toxicology." *Rev Environ Contam Toxicol* 183: 55-97.
- Giordano, G. and L. G. Costa (2012). "Developmental neurotoxicity: some old and new issues." *ISRN Toxicol* 2012: 814795.
- Giordano, G., et al. (2008). "Neurotoxicity of a polybrominated diphenyl ether mixture (DE-71) in mouse neurons and astrocytes is modulated by intracellular glutathione levels." *Toxicol Appl Pharmacol* 232(2): 161-168.
- Giordano, G., et al. (2009). "Mouse cerebellar astrocytes protect cerebellar granule neurons against toxicity of the polybrominated diphenyl ether (PBDE) mixture DE-71." *Neurotoxicology* 30(2): 326-329.
- Gismondi, E. and J. P. Thome (2014). "Effects of two PBDE congeners on the moulting enzymes of the freshwater amphipod *Gammarus pulex*." *Environmental Pollution* 191: 119-125.
- Glass, L., et al. (2014). Correspondence of parent report and laboratory measures of inattention and hyperactivity in children with heavy prenatal alcohol exposure. *Neurotoxicol Teratol*. 2014 Mar-Apr; 42:43-50. [Neurotoxicology and teratology].
- Godduhn, A. and L. K. Duffy (2003). "Multi-generation health risks of persistent organic pollution in the far north: Use of the precautionary approach in the Stockholm Convention." *Environmental Science and Policy* 6(4): 341-353.
- Goines, P. and J. Van De Water (2010). "The immune system's role in the biology of autism." *Current Opinion in Neurology* 23(2): 111-117.
- Goines, P. E. and P. Ashwood (2013). "Cytokine dysregulation in autism spectrum disorders (ASD): Possible role of the environment." *Neurotoxicology and Teratology* 36: 67-81.
- Golka, K., et al. (2000). "Psychological effects upon exposure to polyhalogenated dibenzodioxins and dibenzofurans." *Chemosphere* 40(9-11): 1271-1275.
- Golub, M., et al. (2010). "Gene-toxicant interactions: Developmental PBDE effects on the behavioral phenotype of the Mecp2-308 Rett syndrome mouse model." *Neurotoxicology and Teratology* 32(4): 507.

- Golub, M. S. (2005). "Cognitive testing in infant monkeys: Responding to biomedical and public health concerns." *Neurotoxicol Teratol* 27(3): 367-368.
- Golub, M. S. (2006). "Neurodevelopmental Toxicity And Environmental Contaminants In California's Research And Regulatory Programs." *Toxicol Sci* 90(1-S): 148.
- Gomez, M. J., et al. (2007). "The environmental fate of organic pollutants through the global microbial metabolism." *Molecular Systems Biology* 3: 114.
- Gonzalez-Doncel, M., et al. (2014). "Limitations of waterborne exposure of fish early life stages to BDE-47." *Aquatic Toxicology* 148: 184-194.
- Goodman, J. E. (2009). "Neurodevelopmental effects of decabromodiphenyl ether (BDE-209) and implications for the reference dose." *Regul Toxicol Pharmacol* 54(1): 91-104.
- Goodman, J. E., et al. (2010). "Prenatal PBDEs and neurodevelopment: accuracy of assessment." *Environ Health Perspect* 118(11): A468-469; author reply A469-470.
- Goodrich, E. S. (1937). "On the spinal nerves of the Myxinoidea." *Quart Jour Microsc Sci* 80((1)): 153-158.
- Goralczyk, K., et al. (2012). "[Indoor dust as a pathway of human exposure to polybrominated diphenyl ethers (PBDEs)]." *Rocz Panstw Zakl Hig* 63(1): 1-8.
- Gosavi, R. A., et al. (2013). "Mimicking of estradiol binding by flame retardants and their metabolites: a crystallographic analysis." *Environ Health Perspect* 121(10): 1194-1199.
- Gou, J. H., et al. (2013). Multifunctional Non-woven Carbon Nanopaper: Fabrication, Properties, and Applications. *Applied Materials and Technologies for Modern Manufacturing, Pts 1-4*. L. Zheng, S. Skuroda, H. Liu et al. Stafa-Zurich, Trans Tech Publications Ltd. 423-426: 97-105.
- Grandjean, P. and P. J. Landrigan (2014). "Neurobehavioural effects of developmental toxicity." *Lancet Neurol* 13(3): 330-338.
- Grant, K., et al. (2013). "Health consequences of exposure to e-waste: A systematic review." *The Lancet Global Health* 1(6): e350-e361.
- Gray, L. E., Jr., et al. (1983). "Assessment of the utility of postnatal testing following prenatal exposure to forty chemicals." *Prog Clin Biol Res* 140: 39-72.
- Gray, L. E., Jr., et al. (1986). "An evaluation of figure-eight maze activity and general behavioral development following prenatal exposure to forty chemicals: effects of cytosine arabinoside, dinocap, nitrofen, and vitamin A." *Neurotoxicology* 7(2): 449-462.

Gray, L. R., et al. (2014). Is the central nervous system a reservoir of HIV-1? *Curr Opin HIV AIDS*. 9: 552-558. [Current opinion in HIV and AIDS].

Gray, S., et al. (2014). "The Adult ADHD Self-Report Scale (ASRS): utility in college students with attention-deficit/hyperactivity disorder." *PeerJ* 2: e324.

Gregg, R. A., et al. (2013). Mephedrone interactions with cocaine: prior exposure to the 'bath salt' constituent enhances cocaine-induced locomotor activation in rats. *Behav Pharmacol*. 24: 684-688. [Behavioural pharmacology].

Gribble, K. E., et al. (2011). "Gene and protein structure of the mate recognition protein gene family in *Brachionus manjavacas* (Rotifera)." *Hydrobiologia* 662(1): 35-42.

Griffis, L. C., et al. (1978). "Combined effects of fenmetozole and ethanol." *Clin Pharmacol Ther* 24(3): 350-353.

Grishina, E. V., et al. (2008). "Accelerated utilization of lactate under the effect of hypoxen after intensive exercise." *Bull Exp Biol Med* 145(2): 198-201.

Gross, M. S., et al. (2015). "Primary Role of Cytochrome P450 2B6 in the Oxidative Metabolism of 2,2',4,4',6-Pentabromodiphenyl Ether (BDE-100) to Hydroxylated BDEs." *Chem Res Toxicol*.

Gross, M. S., et al. (2013). "Predominant role of human CYP2B6 in the oxidative metabolism of BDE-47 and BDE-100 to potentially toxic metabolites." *Abstracts of Papers American Chemical Society* 246: 284-ENVR.

Grunner, O. (1975). "Vegetative reactivity and vigilance level under the influence of constant direct current of a low intensity magnetic field." *Casop's l?kar? cesk?ch* 114(20): 618-622.

Grunner, O. and J. Klempirik (1978). "Electrographical estimation of changes in vigilance (author's transl)." *Casop's l?ka?? ?esk?ch* 117(13): 401-407.

Grzegorzczuk, M. (2008). "Comparison of two different stochastic models for extracting protein regulatory pathways using Bayesian networks." *J Toxicol Environ Health A* 71(11-12): 827-834.

Gueguen, M., et al. (2011). "Shellfish and residual chemical contaminants: hazards, monitoring, and health risk assessment along French coasts." *Rev Environ Contam Toxicol* 213: 55-111.

Guengerich, F. P., et al. (1990). "Activation of mutagens by human cytochrome p-450 enzymes, in: mutation and the environment." *Prog Clin Biol Res* 340(PT B): 87-96.

- Gundersen, Y., et al. (2005). "[Brominated flame retardants may cause brain injuries in the fetus and the newborn]." *Tidsskr Nor Laegeforen* 125(22): 3098-3100.
- Gundersen, Y., et al. (2005). "Brominated flame retardants may impair brain development by disrupting thyroid hormonal balance." *Tidsskrift for den Norske Laegeforening* 125(22): 3098-3100.
- Gunter, J. B., et al. (2000). "Continuous epidural butorphanol relieves pruritus associated with epidural morphine infusions in children." *Paediatr Anaesth* 10(2): 167-172.
- Guo, Z. (2014). "Improve our understanding of semivolatile organic compounds in buildings." *Indoor and Built Environment* 23(6): 769-773.
- Gupta, B. N., et al. (1979). "TOXICOLOGICAL STUDIES OF AMMONIUM SULFAMATE IN RAT AFTER REPEATED ORAL ADMINISTRATION." *Toxicology* 13(1): 45-50.
- Guru, M., et al. (2009). "Processing of urea-formaldehyde-based particleboard from hazelnut shell and improvement of its fire and water resistance." *Fire and Materials* 33(8): 413-419.
- Gussi, M. A. and J. L. Dytz (2008). "[Religion and spirituality in education and nursing assistance]." *Rev Bras Enferm* 61(3): 377-384.
- Gustafsson, C., et al. (1997). "Effects of Normobaric Hypoxic Confinement on Visual and Motor Performance." *Aviation, Space, and Environmental Medicine* 68(11): 985-992.
- Guxens, M., et al. (2012). "Cohort Profile: The INMA-INfancia y Medio Ambiente- (Environment and Childhood) Project." *International Journal of Epidemiology* 41(4): 930-940.
- Guyot, R., et al. (2014). "Toxicogenomic analysis of the ability of brominated flame retardants TBBPA and BDE-209 to disrupt thyroid hormone signaling in neural cells." *Toxicology* 325: 125-132.
- Gyorffy, E., et al. (2004). "DNA adducts in tumour, normal peripheral lung and bronchus, and peripheral blood lymphocytes from smoking and non-smoking lung cancer patients: correlations between tissues and detection by <sup>32</sup>P-postlabelling and immunoassay." *Carcinogenesis (Oxford)* 25(7): 1201-1209.
- Haave, M., et al. (2011). "Long-term effects of environmentally relevant doses of 2,2',4,4',5,5' hexachlorobiphenyl (PCB153) on neurobehavioural development, health and spontaneous behaviour in maternally exposed mice." *Behavioral and Brain Functions* 7: 14.

Haave, M., et al. (2011). "Cerebral gene expression and neurobehavioural development after perinatal exposure to an environmentally relevant polybrominated diphenylether (BDE47)." *Cell Biol Toxicol* 27(5): 343-361.

Hagberg, B. and M. Kyllerman (1983). "Epidemiology of mental retardation: a swedish survey." *Brain Dev* 5: 441-449.

Hahn, S., et al. (2006). Concise international chemical assessment document 71: 1-46.

Hajela, R. K., et al. (2003). "Comparative effects of methylmercury and Hg(2+) on human neuronal N- and R-type high-voltage activated calcium channels transiently expressed in human embryonic kidney 293 cells." *J Pharmacol Exp Ther* 306(3): 1129-1136.

Hall, T. M. (2013). *Computational Chemistry and Macromolecular Modeling*. RePORTER Database National Institutes of Health.

Hallgren, S. and P. O. Darnerud (2002). "Polybrominated diphenyl ethers (PBDEs), polychlorinated biphenyls (PCBs) and chlorinated paraffins (CPs) in rats-testing interactions and mechanisms for thyroid hormone effects." *Toxicology* 177(2-3): 227-243.

Hama, H. and S. Okabe (2013). "Factors Dominating Dielectric Performance of Real-size Gas Insulated System and Their Measures by Dielectric Coatings in SF6 and Potential Gases." *Ieee Transactions on Dielectrics and Electrical Insulation* 20(5): 1737-1748.

Hamers, T., et al. (2011). "In Vitro Toxicity Profiling of Ultrapure Non-Dioxin-like Polychlorinated Biphenyl Congeners and Their Relative Toxic Contribution to PCB Mixtures in Humans." *Toxicological Sciences* 121(1): 88-100.

Hamlin, H. J. (2012). "Prenatal Stress and Development: Beyond The Single Cause and Effect Paradigm." *Birth Defects Research Part C - Embryo Today: Reviews* 96(4): 289-298.

Hamlin, H. J. and L. J. Guillette (2011). "Embryos as Targets of Endocrine Disrupting Contaminants in Wildlife." *Birth Defects Research Part C-Embryo Today-Reviews* 93(1): 19-33.

Hampl, K., et al. (2014). "Spinal anesthesia revisited: toxicity of new and old drugs and compounds." *Curr Opin Anaesthesiol.* 27(5): 549-555. [Current opinion in anaesthesiology].

Han, R. L. (2013). "Formation and characterization of (melamine-TMC) based thin film composite NF membranes for improved thermal and chlorine resistances." *Journal of Membrane Science* 425: 176-181.

- Han, X. B., et al. (2011). "A whole life cycle assessment on effects of waterborne PBDEs on gene expression profile along the brain-pituitary-gonad axis and in the liver of zebrafish." *Mar Pollut Bull* 63(5-12): 160-165.
- Han, Z., et al. (2014). "Multiple bio-analytical methods to reveal possible molecular mechanisms of developmental toxicity in zebrafish embryos/larvae exposed to tris(2-butoxyethyl) phosphate." *Aquatic Toxicology* 150: 175-181.
- Hansson, S. O. (2008). "Regulating BFRs - From science to policy." *Chemosphere* 73(2): 144-147.
- Hardy, M. and T. Stedeford (2008). "Developmental neurotoxicity: when research succeeds through inappropriate statistics." *Neurotoxicology* 29(3): 476.
- Hardy, M. and T. Stedeford (2008). "Use of the pup as the statistical unit in developmental neurotoxicity studies: Overlooked model or poor research design?" *Toxicological Sciences* 103(2): 409-410.
- Hardy, M. L. (2002). "The toxicology of the three commercial polybrominated diphenyl oxide (ether) flame retardants." *Chemosphere* 46(5): 757-777.
- Hardy, M. L. (2004). "Neurobehavioral effects of decabromodiphenyl ether (Deca) in neonatal mice." *Toxicol Sci* 81(2): 528-529.
- Hardy, M. L., et al. (2009). "Toxicology and human health assessment of decabromodiphenyl ether." *Critical Reviews in Toxicology* 39: 1-44.
- Hargreaves, A. J., et al. (2014). Cytoskeletal disruption as a biomarker of developmental neurotoxicity, Academic Press Ltd-Elsevier Science Ltd, 24-28 Oval Road, London Nw1 7dx, Uk.
- Harley, K. G., et al. (2011). Association of prenatal exposure to polybrominated diphenyl ethers and infant birth weight. *Am J Epidemiol*. 174: 885-892. [American journal of epidemiology].
- Harley, K. G., et al. (2010). PBDE concentrations in women's serum and fecundability. *Environ Health Perspect*. 118: 699-704. (Levesque et al.).
- Hartoft-Nielsen, M. L., et al. (2011). "Do thyroid disrupting chemicals influence foetal development during pregnancy?" *Journal of Thyroid Research* 2011.
- Harvey, J. A., et al. (1977). "Comparison between the neurotoxic and serotonin-depleting effects of various halogenated derivatives of amphetamine in the rat." *J Pharmacol Exp Ther* 202(3): 581-589.

Hass, U. and C. Wamberg (2002). "Developmental neurotoxicity study of the brominated flame retardant tetrabromobisphenol a in rats." *Reprod Toxicol* 16(4): 412.

Hassenklover, T. and U. Bickmeyer (2006). "The marine secondary metabolites 2,4-dibromophenol and 2,4,6-tribromophenol differentially modulate voltage dependent ion currents in neuroendocrine (PC12) cells." *Aquatic Toxicology* 79(4): 384-390.

Hassenklover, T., et al. (2006). "Bromophenols, both present in marine organisms and in industrial flame retardants, disturb cellular Ca<sup>2+</sup> signaling in neuroendocrine cells (PC12)." *Aquatic Toxicology* 76(1): 37-45.

Hatanaka, T., et al. (2015). "Experimental Investigation of Program Voltage (20 V) Generation With Boost Converter for 3-D-Stacked NAND Flash SSD." *Ieee Transactions on Components Packaging and Manufacturing Technology* 5(2): 188-193.

Hatcher, S. L. (1982). "The psychological experience of nursing mothers upon learning of a toxic substance in their breast milk." *Psychiatry* 45(2): 172-181.

Haugaard-Kedstrom, L. M., et al. (2011). "Design, synthesis, and characterization of a single-chain peptide antagonist for the relaxin-3 receptor RXFP3." *J Am Chem Soc* 133(13): 4965-4974.

Hay, M. E., et al. (1990). "SPECIALIST HERBIVORES REDUCE THEIR SUSCEPTIBILITY TO PREDATION BY FEEDING ON THE CHEMICALLY DEFENDED SEAWEED *AVRAINVILLEA-LONGICAULIS*." *Limnology and Oceanography* 35(8): 1734-1743.

Hayashi, A., et al. (1986). "Increased cadmium resistance of skin fibroblasts from menkes' disease patients." *Brain Dev* 8(1): 73-76.

Hayashi, M., et al. (2014). "Secreted calmodulin-like skin protein ameliorates scopolamine-induced memory impairment." *Neuroreport*. 25(9): 725-729. [Neuroreport].

He, J., et al. (2011). "Chronic zebrafish low dose decabrominated diphenyl ether (BDE-209) exposure affected parental gonad development and locomotion in F1 offspring." *Ecotoxicology* 20(8): 1813-1822.

He, L. L., et al. (2013). Study on Synthesis of Cyclotriphosphazene containing Aminopropylsilicone Functional Group as Flame Retardant. *Advanced Materials and Engineering Materials* II. K. Kida. Stafa-Zurich, Trans Tech Publications Ltd. 683: 25-29.

He, P., et al. (2008). "PBDE-47-induced oxidative stress, DNA damage and apoptosis in primary cultured rat hippocampal neurons." *Neurotoxicology* 29(1): 124-129.

He, P., et al. (2011). "Toxic effect of PBDE-47 on thyroid development, learning, and memory, and the interaction between PBDE-47 and PCB153 that enhances toxicity in rats." *Toxicol Ind Health* 27(3): 279-288.

He, P., et al. (2009). "Mechanisms underlying the developmental neurotoxic effect of PBDE-47 and the enhanced toxicity associated with its combination with PCB153 in rats." *Neurotoxicology* 30(6): 1088-1095.

He, P., et al. (2009). "Mechanism of the neurotoxic effect of PBDE-47 and interaction of PBDE-47 and PCB153 in enhancing toxicity in SH-SY5Y cells." *Neurotoxicology* 30(1): 10-15.

He, W., et al. (2008). "Effects of PBDE-47 on cytotoxicity and genotoxicity in human neuroblastoma cells in vitro." *Mutat Res* 649(1-2): 62-70.

Hefner, R. E., Jr., et al. (1975). "Repeated inhalation toxicity of diphenyl oxide in experimental animals." *Toxicol Appl Pharmacol* 33(1): 78-86.

Henck, J. W. (2214). "Neurobehavioral toxicity of perinatally administered polybrominated biphenyls." *Diss Abstr Int B* 46: 2214-2215.

Henck, J. W., et al. (1994). "Developmental neurotoxicity of polybrominated biphenyls." *Neurotoxicol Teratol* 16(4): 391-399.

Henck, J. W. and R. H. Rech (1986). "Effect of perinatal polybrominated biphenyl exposure on acquisition and performance of an autoshaping paradigm." *Neurotoxicology* 7(2): 651-663.

Henck, J. W. and R. H. Rech (1986). "Effect of perinatal polybrominated biphenyl exposure on acquisition and performance of an autoshaping paradigm." *Symposium on Neurotoxicology in the Fetus and Child Held at the Fourth International Neurotoxicology Conference, Little Rock, Ark., USA, Sept. 9-13, 1985. Neurotoxicology (Little Rock)* 7(2): 651-664.

Henck, J. W. and R. H. Rech (1986). "Effect of Perinatal Polybrominated Biphenyl Exposure on Acquisition and Performance of an Autoshaping Paradigm." *NeuroToxicology* 7(2): 651-664.

Hendriks, H. S., et al. (2010). "PCB-47, PBDE-47, and 6-OH-PBDE-47 differentially modulate human GABAA and alpha4beta2 nicotinic acetylcholine receptors." *Toxicol Sci* 118(2): 635-642.

Hendriks, H. S., et al. (2014). "Effects of neonatal exposure to the flame retardant tetrabromobisphenol-A, aluminum diethylphosphinate or zinc stannate on long-term potentiation and synaptic protein levels in mice." *Arch Toxicol*.



Hendriks, H. S., et al. (2014). "A comparison of the in vitro cyto- and neurotoxicity of brominated and halogen-free flame retardants: prioritization in search for safe(r) alternatives." *Arch Toxicol* 88(4): 857-869.

Hendriks, H. S., et al. (2012). "Multiple novel modes of action involved in the in vitro neurotoxic effects of tetrabromobisphenol-A." *Toxicol Sci* 128(1): 235-246.

Hendriks, H. S., et al. (2012). "Modulation of human alpha4beta2 nicotinic acetylcholine receptors by brominated and halogen-free flame retardants as a measure for in vitro neurotoxicity." *Toxicol Lett* 213(2): 266-274.

Henny, C. J., et al. (2010). "North American Osprey Populations and Contaminants: Historic and Contemporary Perspectives." *Journal of Toxicology and Environmental Health Part B Critical Reviews* 13(7-8): 579-603.

Herbstman, J. B., et al. (2008). Birth delivery mode modifies the associations between prenatal polychlorinated biphenyl (PCB) and polybrominated diphenyl ether (PBDE) and neonatal thyroid hormone levels. *Environ Health Perspect.* 116: 1376-1382. (Levesque et al.).

Heredia, L., et al. (2012). "Behavioral effects of oral subacute exposure to BDE-209 in young adult mice: a preliminary study." *Food Chem Toxicol* 50(3-4): 707-712.

Hernick, A. D., et al. (2011). "Sharing unexpected biomarker results with study participants." *Environ Health Perspect* 119(1): 1-5.

Hernik, A., et al. (2010). "Organohalogen compounds in human cord blood from Poland - Pilot study." *Toxicology Letters* 196: S37.

Herr, D. W., et al. (1991). "Brain distribution and fate of tris(2-chloroethyl) phosphate in fischer 344 rats." *Drug Metabolism and Disposition* 19(2): 436-442.

Herron, J. N. and A. A.-P. Wei (2013). Novel Reagents and Methods for Rapid and High Throughput Detection of Aflatoxin C. RePORTER Database National Institutes of Health.

Hertz-Picciotto, I. (2008). The Charge Study: Childhood Autism Risks from Genetics and the Environment. RePORTER Database National Institutes of Health.

Hertz-Picciotto, I. (2009). The Charge Study: Childhood Autism Risks from Genetics and the Environment. RePORTER Database National Institutes of Health.

Hertz-Picciotto, I. (2010). The Charge Study: Childhood Autism Risks from Genetics and the Environment. RePORTER Database National Institutes of Health.

Hertz-Picciotto, I. (2011). The Charge Study: Childhood Autism Risks from Genetics and the Environment. RePORTER Database National Institutes of Health.

Hertz-Picciotto, I. (2012). The Charge Study: Childhood Autism Risks from Genetics and the Environment. RePORTER Database National Institutes of Health.

Hertz-Picciotto, I. (2013). The charge study: childhood autism risks from genetics and the environment. RePORTER Database National Institutes of Health.

Hertz-Picciotto, I. (2013). Project 1: Epidemiology and the Environment in Autism (Hertz-Picciotto). RePORTER Database National Institutes of Health.

Hertz-Picciotto, I., et al. (2011). "Polybrominated diphenyl ethers in relation to autism and developmental delay: a case-control study." *Environ Health* 10(1): 1.

Hertz-Picciotto, I., et al. (2006). "The CHARGE study: An epidemiologic investigation of genetic and environmental factors contributing to autism." *Environmental Health Perspectives* 114(7): 1119-1125.

Hertz-Picciotto, I., et al. (2011). Autism Risk, Prenatal Environmental Exposures, and Pathophysiologic Markers. RePORTER Database National Institutes of Health.

Hertz-Picciotto, I., et al. (2012). Autism Risk, Prenatal Environmental Exposures, and Pathophysiologic Markers. RePORTER Database National Institutes of Health.

Hertz-Picciotto, I., et al. (2013). Autism Risk, Prenatal Environmental Exposures, and Pathophysiologic Markers. RePORTER Database National Institutes of Health.

Herzog, T., et al. (2004). Improvement of the adhesion of new memory packages by surface engineering. 54th Electronic Components & Technology Conference, Vols 1 and 2, Proceedings. New York, Ieee: 1136-1141.

Hicks, H. E. and C. T. De Rosa (2004). "Emerging chemicals of concern and their potential for adverse neurological effects." *Neurotoxicology (Amsterdam)* 25(4): 690.

Hill, J., et al. (2012). "Environmental toxins linked to neurodegeneration and autism activate the brain's immune system." *Journal of the American Pharmacists Association* 52(2): 279.

Hingtgen, J. N. and M. H. Aprison (1975). "Behavioral depression in pigeons following l-tryptophan administration." *Life Sci* 16(9): 1471-1476.

Hoagland, H. and J. Wallace (2008). "Arc protection around the world." *Occup Health Saf* 77(8): 26, 28, 30.

Hogstrand, C., et al. (2010). "Systems biology investigation of the mechanisms of brominated flame retardant neurotoxicity." *Comparative Biochemistry and Physiology - A Molecular and Integrative Physiology* 157: S4.

Holland, N., et al. (2010). "Trans-placental exposures and children's mental and physical health." *Environmental and Molecular Mutagenesis* 51(7): 694.

Holland, N. T. (2009). Project C: Epigenetic Effects of DDT/E and PBDEs on Puberty. RePORTER Database National Institutes of Health.

Holland, N. T. (2010). Project C: Epigenetic Effects of DDT/E and PBDEs on Puberty. RePORTER Database National Institutes of Health.

Holland, N. T. (2011). Project C: Epigenetic Effects of DDT/E and PBDEs on Puberty. RePORTER Database National Institutes of Health.

Holland, N. T. (2012). Project C: Epigenetic Effects of DDT/E and PBDEs on Puberty. RePORTER Database National Institutes of Health.

Holland, N. T. (2013). Project C: Epigenetic Effects of DDT/E and PBDEs on Puberty. RePORTER Database National Institutes of Health.

Hollert, H., et al. (2007). "ESPR's total environment." *Environmental Science and Pollution Research* 14(1): 1-2.

Holman, E. W. (1987). "RECOGNIZABILITY OF SEXUAL AND ASEXUAL SPECIES OF ROTIFERS." *Systematic Zoology* 36(4): 381-386.

Hombach-Klonisch, S., et al. (2005). "Molecular actions of polyhalogenated arylhydrocarbons (PAHs) in female reproduction." *Current Medicinal Chemistry* 12(5): 599-616.

Hong, H., et al. (2014). "Mechanisms of hexabromocyclododecanes induced developmental toxicity in marine medaka (*Oryzias melastigma*) embryos." *Aquatic Toxicology* 152: 173-185.

Hong, L., et al. (2014). "Breastfeeding and autism spectrum disorders." *Topics in Clinical Nutrition* 29(3): 278-285.

Hong, T., et al. (2013). "Long-term changes in visual acuity in an older population over a 15-year period: the Blue Mountains Eye Study." *Ophthalmology* 120(10): 2091-2099.

Hooper, K. (2007). "DecaBDE exposures: old myths, new realities." *Neurotoxicol Teratol* 29(3): 413.

- Hooper, K. and T. A. McDonald (2000). "The PBDEs: An emerging environmental challenge and another reason for breast-milk monitoring programs." *Environmental Health Perspectives* 108(5): 387-392.
- Horn, D., et al. (2012). "No brachydactyly type e in a family with hdac4 haploinsufficiency causing facial dysmorphism, and mild developmental delay." *Genetic Counseling* 23(1): 125-126.
- Horter, M. (1977). "THE APPLICATION PERIOD AS A LEARNABLE FACTOR." *Zeitschrift fuer Tierpsychologie* 45(3): 256-287.
- Horter, M. (1977). "[The applied time interval as a learnable dimension]." *Z Tierpsychol* 45(3): 256-287.
- Horter, M. (1980). "APPLICATION OF LEARNED ABILITIES IN THE PRESENCE OF A PARTNER TESTS WITH RATS." *Zeitschrift fuer Tierpsychologie* 53(1): 79-95.
- Horter, M. and M. Boeger (1981). "THE INFLUENCE OF FIXED TRAINING SESSIONS ON THE LEARNING PROCESS." *Zeitschrift fuer Tierpsychologie* 57(2): 111-122.
- Horter, M. and G. Duecker (1979). "LEARNING OF AN APPLICATION PERIOD DETERMINED PERIOD OF TIME BY THE AID OF A SIGNAL." *Zeitschrift fuer Tierpsychologie* 50(4): 423-435.
- Horton, M. K., et al. (2013). "Predictors of serum concentrations of polybrominated flame retardants among healthy pregnant women in an urban environment: a cross-sectional study." *Environ Health* 12: 23.
- Hover, C., et al. (2009). "Occurrence of five classes of chemicals in indoor dust: An evaluation of the human health risks." *Science of the Total Environment* 407(18): 5194-5196.
- Howard, G. J. (2014). "Chemical alternatives assessment: The case of flame retardants." *Chemosphere* 116: 112-117.
- Hoyer, C., et al. (2013). Preconceptional paternal exposure to a single traumatic event affects postnatal growth of female but not male offspring. *Neuroreport*. 24: 856-860. [Neuroreport].
- Hruban, L., et al. (2014). "Analysis of CTG interpretation of expertobstetricians-is it time for change?" *Journal of Maternal-Fetal and Neonatal Medicine* 27: 192.
- Hsiao, G., et al. (1996). "Marchantin H as a natural antioxidant and free radical scavenger." *Arch Biochem Biophys* 334(1): 18-26.

Hu, J., et al. (2009). "Synthesis and characterisation of thermally expandable microcapsules by suspension polymerisation." *Pigment & Resin Technology* 38(5): 280-284.

Hu, Z., et al. (2014). Caffeine induces behavioural sensitization and overexpression of cocaine-regulated and amphetamine-regulated transcript peptides in mice. *Behav Pharmacol.* 25: 32-43. [Behavioural pharmacology].

Huang, M. L. and A. Rauk (2004). "Reactions of one-electron-oxidized methionine with oxygen: An ab initio study." *Journal of Physical Chemistry A* 108(29): 6222-6230.

Huang, Q., et al. (2013). "Reductive dechlorination of tetrachlorobisphenol A by Pd/Fe bimetallic catalysts." *J Hazard Mater* 262: 634-641.

Huang, S. C., et al. (2010). "Comparative cytotoxicity and intracellular accumulation of five polybrominated diphenyl ether congeners in mouse cerebellar granule neurons." *Toxicol Sci* 114(1): 124-132.

Huen Northcote, K., et al. (2013). "DNA methylation in mexican-american newborns and nine-year-old children exposed to persistent organic pollutants in utero." *Environmental and Molecular Mutagenesis* 54: S17.

Hulzebos, E. and I. Gerner (2010). "Weight factors in an Integrated Testing Strategy using adjusted OECD principles for (Q)SARs and extended Klimisch codes to decide on skin irritation classification." *Regulatory Toxicology and Pharmacology* 58(1): 131-144.

Humne, V. and P. Lokahnde (2014). "Efficient deallylation of allyl phenyl ethers by molecular iodine in PEG-400 and their utility for flavone synthesis." *Synthetic Communications* 44(7): 929-935.

Hung, K. L. (1989). "Auditory brainstem responses in patients with neonatal hyperbilirubinemia and bilirubin encephalopathy." *Brain Dev* 11(5): 297-301.

Huskisson, E. C. (1974). "Measurement of pain." *Lancet* 2(7889): 1127-1131.

Hussain, M. and S. Mumtaz (2014). "E-waste: impacts, issues and management strategies." *Reviews on Environmental Health* 29(1-2, Sp. Iss. SI): 53-58.

Hutter, H. P., et al. (2013). "Semivolatile compounds in schools and their influence on cognitive performance of children." *Int J Occup Med Environ Health* 26(4): 628-635.

Ibhazehiebo, K., et al. (2011). "Disruption of thyroid hormone receptor-mediated transcription and thyroid hormone-induced Purkinje cell dendrite arborization by polybrominated diphenyl ethers." *Environ Health Perspect* 119(2): 168-175.

Ibhazehiebo, K., et al. (2011). "Suppression of thyroid hormone receptor-mediated transcription and disruption of thyroid hormone-induced cerebellar morphogenesis by the polybrominated biphenyl mixture, BP-6." *Neurotoxicology* 32(4): 400-409.

Ibhazehiebo, K., et al. (2011). "1,2,5,6,9,10-alphaHexabromocyclododecane (HBCD) impairs thyroid hormone-induced dendrite arborization of Purkinje cells and suppresses thyroid hormone receptor-mediated transcription." *Cerebellum* 10(1): 22-31.

Ibhazehiebo, K. and N. Koibuchi (2012). "Melamine: An emerging neurotoxicant?" *Journal of Medicine and Biomedical Research* 11(1): 20-28.

Ibhazehiebo, K. and N. Koibuchi (2012). "Temporal effects of thyroid hormone (TH) and decabrominated diphenyl ether (BDE209) on Purkinje cell dendrite arborization." *Niger J Physiol Sci* 27(1): 11-17.

Ibhazehiebo, K. and N. Koibuchi (2014). "Impact of endocrine-disrupting chemicals on thyroid function and brain development." *Expert Review of Endocrinology and Metabolism* 9(6): 579-591.

Ibhazehiebo, K., et al. (2011). "Mechanism of suppression of thyroid hormone receptor-mediated transcription by polybrominated diphenyl ethers." *Thyroid* 21: A86.

Iida, K., et al. (2013). "Localization of an extratemporal lesion-related epileptogenic zone using magnetoencephalography in patients with dual pathology." *Epilepsy Currents* 13: 444-445.

Iizasa, T., et al. (1993). "Invasive tumors derived from xenotransplanted, immortalized human cells after in vivo exposure to chemical carcinogens." *Carcinogenesis (Oxford)* 14(9): 1789-1794.

Iji, M., et al. (2011). "Development of Highly Functional Polylactic Acid Composites to Be Used in Electronic Instruments." *Kobunshi Ronbunshu* 68(6): 370-381.

Ikeda, S., et al. (1998). "Synthesis and reactions of (pi-allyl)bromo- hydrotris(3, 5-dimethylpyrazolyl)borato rhodium(III)." *Organometallics* 17(17): 3770-3774.

Ikoma, Y., et al. (2007). "Quantitative analysis for estimating binding potential of the peripheral benzodiazepine receptor with [(11)C]DAA1106." *J Cereb Blood Flow Metab* 27(1): 173-184.

Illnerova, H. and J. Skopova (1976). "Regulation of the diurnal rhythm in rat pineal serotonin-N-acetyltransferase activity and serotonin content during ontogenesis." *J Neurochem* 26(5): 1051-1052.

Imam, S. K., et al. (1975). "Effect of 3,4-trans-2,2-dimethyl-3-phenyl-4-P-(beta-pyrrolidinoethoxy) phenyl -7-methoxy chroman (centchroman) on the biochemistry of

the fallopian tube and uterus of rhesus monkeys (*Macaca mulatta*).*"* *Contraception* 11(3): 309-316.

Imm, P., et al. (2009). Household exposures to polybrominated diphenyl ethers (PBDEs) in a Wisconsin Cohort. *Environ Health Perspect.* 117: 1890-1895. (Levesque et al.).

Inskip, P. D. (2008). Studies of Non-Ionizing Radiation-Related Cancer. RePORTER Database National Institutes of Health.

Ireson, J. E. (1984). "THE EFFECTIVENESS OF BDELLODES-LAPIDARIA ACARI BDELLIDAE AS A PREDATOR OF SMINTHURUS-VIRIDIS COLLEMBOLA SMINTHURIDAE IN NORTHWEST TASMANIA AUSTRALIA." *Journal of the Australian Entomological Society* 23(3): 185-191.

Isales, G. M., et al. (2015). "Triphenyl phosphate-induced developmental toxicity in zebrafish: Potential role of the retinoic acid receptor." *Aquatic Toxicology* 161: 221-230.

Iwasaki, T., et al. (2011). "Disruption of thyroid hormone receptor-mediated transcription, thyroid hormone-induced purkinje cell dendrite arborization and granule cell neurite extension by polybrominated diphenylethers." *Endocrine Reviews* 32(3).

Iyer, G., et al. (2007). "Development of environmentally responsive hydrogels with metal affinity behavior." *Journal of Applied Polymer Science* 105(3): 1210-1220.

Izzotti, A., et al. (1991). "Benzo(a)pyrene diol epoxide-DNA adducts in alveolar macrophages of smokers." *Carcinogenesis (Eynsham)* 12(7): 1281-1286.

Izzotti, A., et al. (1991). "BENZO-A-PYRENE DIOL EPOXIDE DNA ADDUCTS IN ALVEOLAR MACROPHAGES OF SMOKERS." *Carcinogenesis (Oxford)* 12(7): 1281-1286.

Jacobi, S., et al. (2009). "An oral (gavage) developmental neurotoxicity study of decabromodiphenyl oxide (DeBDPO) in rats." *Toxicology Letters* 189: S260.

Jan Van Schooten, F., et al. (1990). "Determination of benzo(a)pyrene diol epoxide-DNA adducts in white blood cell DNA from coke-oven workers: The impact of smoking." *J Natl Cancer Inst (Bethesda)* 82(11): 927-933.

Janes, A. C., et al. (2012). Prefrontal and limbic resting state brain network functional connectivity differs between nicotine-dependent smokers and non-smoking controls. *Drug Alcohol Depend.* 125: 252-259. [Drug and alcohol dependence].

Janes, A. C., et al. (2010). "Neural substrates of attentional bias for smoking-related cues: an fMRI study." *Neuropsychopharmacology.* 35(12): 2339-2345. [Neuropsychopharmacology : official publication of the American College of Neuropsychopharmacology].

Janssen, S. L., et al. (2003). "alphaII - Spectrin and tau breakdown after methamphetamine administration: use as potential biomarkers of neuronal injury." Society for Neuroscience Abstract Viewer and Itinerary Planner 2003: Abstract No. 135.138.

Jarbe, T. U. and G. C. Ohlin (1977). "Interactions between alcohol and other drugs on open-field and temperature measurements in gerbils." *Arch Int Pharmacodyn Ther* 227(1): 106-117.

Jean-Marcais, N., et al. (2015). "The first familial case of inherited 2q37.3 interstitial deletion with isolated skeletal abnormalities including brachydactyly type E and short stature." *Am J Med Genet A* 167a(1): 185-189.

Jensen, S. L. and G. J. Drouant (2006). Valve health monitoring system utilizing smart instrumentation - art. no. 62220F. *Sensors for Propulsion Measurement Applications*. V. Korman. Bellingham, Spie-Int Soc Optical Engineering. 6222: F2220-F2220.

Jenssen, B. M. (2006). "Endocrine-disrupting chemicals and climate change: A worst-case combination for arctic marine mammals and seabirds?" *Environmental Health Perspectives* 114: 76-80.

Ji, B., et al. (2008). "Imaging of peripheral benzodiazepine receptor expression as biomarkers of detrimental versus beneficial glial responses in mouse models of Alzheimer's and other CNS pathologies." *J Neurosci* 28(47): 12255-12267.

Ji, C., et al. (2014). "iTRAQ-based quantitative proteomic analyses on the gender-specific responses in mussel *Mytilus galloprovincialis* to tetrabromobisphenol A." *Aquat Toxicol* 157: 30-40.

Ji, C., et al. (2013). "Proteomic and metabolomic analysis of earthworm *Eisenia fetida* exposed to different concentrations of 2,2',4,4'-tetrabromodiphenyl ether." *J Proteomics* 91: 405-416.

Ji, C., et al. (2013). "Proteomic and metabolomic analysis reveal gender-specific responses of mussel *Mytilus galloprovincialis* to 2,2',4,4'-tetrabromodiphenyl ether (BDE 47)." *Aquat Toxicol* 140-141: 449-457.

Ji, G., et al. (2013). "Acute Toxicity and Oxidative Stress Effects of BDE-47 on Zebrafish Embryos and Larvae." *Asian Journal of Ecotoxicology* 8(5): 731-736.

Ji, L. M., et al. (2011). Preparation and characterization of Mg(OH)<sub>2</sub> flame-retardant with particular morphology via hydrothermal process. *Emerging Focus on Advanced Materials*, Pts 1 and 2. S. Q. Liu and M. Zuo. Stafa-Zurich, Trans Tech Publications Ltd. 306-307: 1311-1316.



Jia, D. L., et al. (2013). "An Efficient Binary Differential Evolution with Parameter Adaptation." *International Journal of Computational Intelligence Systems* 6(2): 328-336.

Jiang, C., et al. (2012). "The role of the IRE1 pathway in PBDE-47-induced toxicity in human neuroblastoma SH-SY5Y cells in vitro." *Toxicol Lett* 211(3): 325-333.

Jiang, H. P., et al. (2008). "[Effect of maternal BDE-209 exposure on the expression of GAP-43 and BDNF in the hippocampus of the offspring rats]." *Nan Fang Yi Ke Da Xue Xue Bao* 28(8): 1319-1322.

Jiang, W. J., et al. (2010). "[Preparation of microencapsulated red phosphorus and its flame-retardant application in PP composites]." *Guang Pu Xue Yu Guang Pu Fen Xi* 30(5): 1329-1335.

Jiang, Y., et al. (2007). "Ataxia-telangiectasia mutated expression is associated with tobacco smoke exposure in esophageal cancer tissues and benzo a pyrene diol epoxide in cell lines." *International Journal of Cancer* 120(1): 91-95.

Jin, S. W., et al. (2010). Cytotoxic Effect Of Decabrominated Diphenyl Ether on RTG-2 cells. Irvin, Sci Res Publ, Inc-Srp.

Jin, S. W., et al. (2010). "Cytotoxicity and apoptosis induction on RTG-2 cells of 2,2',4,4'-tetrabromodiphenyl ether (BDE-47) and decabrominated diphenyl ether (BDE-209)." *Toxicology in Vitro* 24(4): 1190-1196.

Johannessen, D. I. and P. S. Ross (2002). "Late-run sockeye at risk: An overview of environmental contaminants in Fraser River salmon habitat." *Canadian Technical Report of Fisheries and Aquatic Sciences*(2429): i.

Johannsen, F. R., et al. (1977). "EVALUATION OF DELAYED NEURO TOXICITY AND DOSE RESPONSE RELATIONSHIPS OF PHOSPHATE ESTERS IN THE ADULT HEN." *Toxicology and Applied Pharmacology* 41(2): 291-304.

Johannsen, F. R., et al. (1977). "Evaluation of delayed neurotoxicity and dose-response relationships of phosphate esters in the adult hen." *Toxicol Appl Pharmacol* 41(2): 291-304.

Johansen, E. B., et al. (2014). "Behavioral changes following PCB 153 exposure in the Spontaneously Hypertensive rat - an animal model of Attention-Deficit/Hyperactivity disorder." *Behavioral and Brain Functions* 10: 19.

Johansson, A. K., et al. (2009). "POLYBROMINATED DIPHENYL ETHER CONGENER PATTERNS, HEXABROMOCYCLODODECANE, AND BROMINATED BIPHENYL 153 IN EGGS OF PEREGRINE FALCONS (FALCO PEREGRINUS) BREEDING IN SWEDEN." *Environmental Toxicology and Chemistry* 28(1): 9-17.

Johansson, N., et al. (2009). "Neonatal exposure to PFOS and PFOA in mice results in changes in proteins which are important for neuronal growth and synaptogenesis in the developing brain." *Toxicol Sci* 108(2): 412-418.

Johansson, N., et al. (2006). "Neonatal Exposure To Perfluorooctane Sulfonate (PFOS) And Perfluorooctanoic Acid (PFOA) Cause Deranged Behaviour And Increased Susceptibility Of The Cholinergic System In Adult Mice." *Toxicol Sci* 90(1-S): 298.

Johansson, N., et al. (2008). "Neonatal exposure to perfluorooctane sulfonate (PFOS) and perfluorooctanoic acid (PFOA) causes neurobehavioural defects in adult mice." *Neurotoxicology* 29(1): 160-169.

Johansson, N., et al. (2008). "Neonatal exposure to deca-brominated diphenyl ether (PBDE 209) causes dose-response changes in spontaneous behaviour and cholinergic susceptibility in adult mice." *Neurotoxicology* 29(6): 911-919.

Johnson, D. N., et al. (1974). "Preclinical evaluation of AHR-2244 a new psychotherapeutic agent." *Arch Int Pharmacodyn Ther* 211(2): 326-340.

Johnson, G. T., et al. (2010). "Comment on: Effects of decabrominated diphenyl ether (PBDE 209) exposure at different developmental periods on synaptic plasticity in the dentate gyrus of adult rats in vivo." *Toxicological Sciences* 114(2): 387-388.

Johnson, P. I., et al. (2012). Serum and follicular fluid concentrations of polybrominated diphenyl ethers and in-vitro fertilization outcome. *Environ Int.* 2012, Sep 15; 45:9-14. [Environment international].

Jugan, M. L., et al. (2010). "Endocrine disruptors and thyroid hormone physiology." *Biochemical Pharmacology* 79(7): 939-947.

Jurewicz, J., et al. (2013). "Exposure to widespread environmental toxicants and children's cognitive development and behavioral problems." *Int J Occup Med Environ Health* 26(2): 185-204.

Kajta, M. and A. Wojtowicz (2010). "[Neurodevelopmental disorders in response to hormonally active environmental pollutants]." *Przegl Lek* 67(11): 1194-1199.

Kajta, M. and A. K. Wojtowicz (2013). "Impact of endocrine-disrupting chemicals on neural development and the onset of neurological disorders." *Pharmacol Rep* 65(6): 1632-1639.

Kalach, N., et al. (2011). "Intestinal permeability and fecal eosinophils-derived neurotoxin are good diagnosis tools for delayed-onset digestive cow's-milk allergy in toddlers." *Journal of Pediatric Gastroenterology and Nutrition* 52: E159-E160.

Kalantzi, O. I., et al. (2004). Different levels of polybrominated diphenyl ethers (PBDEs) and chlorinated compounds in breast milk from two U.K. Regions. *Environ Health Perspect.* 112: 1085-1091. (Levesque et al.).

Kalantzi, O. I. and P. A. Siskos (2011). "SOURCES AND HUMAN EXPOSURE TO POLYBROMINATED DIPHENYL ETHERS." *Global Nest Journal* 13(2): 99-108.

Kalisz, E. and A. M. Florea (2006). Could intelligent tutors anticipate successfully user reactions? *Computing Anticipatory Systems*. D. M. Dubois. Melville, Amer Inst Physics. 839: 493-499.

Kalita, H. and N. Karak (2014). "Biobased Hyperbranched Shape-Memory Polyurethanes: Effect of Different Vegetable Oils." *Journal of Applied Polymer Science* 131(1): 8.

Kalkbrenner, A. E., et al. (2014). "Environmental chemical exposures and autism spectrum disorders: a review of the epidemiological evidence." *Curr Probl Pediatr Adolesc Health Care* 44(10): 277-318.

Kamstra, J. H., et al. (2014). Transcriptional and epigenetic mechanisms underlying enhanced in vitro adipocyte differentiation by the brominated flame retardant BDE-47. *Environ Sci Technol.* 48: 4110-4119. [Environmental science & technology].

Kanazawa, A., et al. (2010). "Association between indoor exposure to semi-volatile organic compounds and building-related symptoms among the occupants of residential dwellings." *Indoor Air* 20(1): 72-84.

Kancheva, V. D., et al. (2012). "Antiradical and antioxidant activities of new bio-antioxidants." *Biochimie* 94(2): 403-415.

Kaplan, J., et al. (2008). "Determining the critical postnatal exposure level of the brominated flame retardant DE-71 required to induce learning and attention deficits." *Society for Neuroscience Abstract Viewer and Itinerary Planner* 38.

Karlsen, A. S., et al. (2013). Expression of presynaptic markers in a neurodevelopmental animal model with relevance to schizophrenia. *Neuroreport.* 24: 928-933. [Neuroreport].

Karlsson, M. (2006). "Science and norms in policies for sustainable development: Assessing and managing risks of chemical substances and genetically modified organisms in the European Union." *Regulatory Toxicology and Pharmacology* 44(1): 49-56.

Katikaneni, R., et al. (2014). Treatment and prevention of chemotherapy-induced alopecia with PTH-CBD, a collagen-targeted parathyroid hormone analog, in a non-depilated mouse model. *Anticancer Drugs.* 25: 30-38. [Anti-cancer drugs].

Katikaneni, R., et al. (2014). Parathyroid hormone linked to a collagen binding domain promotes hair growth in a mouse model of chemotherapy-induced alopecia in a dose-dependent manner. *Anticancer Drugs*. 25: 819-825. [Anti-cancer drugs].

Katz, R. J. and B. J. Carroll (1977). "Intracranial reward after Lilly 110140 (fluoxetine HCl): evidence for an inhibitory role for serotonin." *Psychopharmacology (Berl)* 51(2): 189-193.

Kaufman, A. S., et al. (2014). "The possible societal impact of the decrease in US blood lead levels on adult IQ." *Environmental research* 132: 413-420.

Kaufman, J. D., et al. (1992). "A study of the cardiac effects of bromochlorodifluoromethane (halon 1211) exposure during exercise." *Am J Ind Med* 21(2): 223-233.

Kawai, M., et al. (2002). "Taste enhancements between various amino acids and IMP." *Chem Senses* 27(8): 739-745.

Keller, K. J., et al. (1976). "Tryptoline inhibition of serotonin uptake in rat forebrain homogenates." *J Pharmacol Exp Ther* 198(3): 619-625.

Keune, H. (2012). "Critical complexity in environmental health practice: Simplify and complexify." *Environmental Health: A Global Access Science Source* 11(SUPPL.1).

Keune, H., et al. (2012). "We're only in it for the knowledge? A problem solving turn in environment and health expert elicitation." *Environ Health* 11 Suppl 1: S3.

Kharlyngdoh, J. B., et al. (2015). "Identification of a group of brominated flame retardants as novel androgen receptor antagonists and potential neuronal and endocrine disrupters." *Environ Int* 74: 60-70.

Khonakdar, H. A., et al. (2007). "Investigation and modeling of temperature dependence recovery behavior of shape-memory crosslinked polyethylene." *Macromolecular Theory and Simulations* 16(1): 43-52.

Khoroshutin, A. V., et al. (2007). "Regioselective bromination of (Tetraphenyltetrabenzoporphyrinato)palladium(II). Synthesis of a new octabromo derivative of the tetraphenyltetrabenzoporphyrin series." *Russian Journal of General Chemistry* 77(11): 1959-1964.

Kicinski, M., et al. (2012). "Neurobehavioral function and low-level exposure to brominated flame retardants in adolescents: a cross-sectional study." *Environ Health* 11: 86.

Kim (2012). "Para- and Ortho-Substitutions Are Key Determinants of Polybrominated Diphenyl Ether Activity toward Ryanodine Receptors and Neurotoxicity (vol 119, pg 519, 2011)." *Environmental Health Perspectives* 120(5): A189.

Kim, K. H., et al. (2011). "Para- and ortho-substitutions are key determinants of polybrominated diphenyl ether activity toward ryanodine receptors and neurotoxicity." *Environ Health Perspect* 119(4): 519-526.

Kim, S. M., et al. (2010). "Exposure to Environmental Toxins in Mothers of Children with Autism Spectrum Disorder." *Psychiatry Investigation* 7(2): 122-127.

Kim, S. Y. and J. H. Yang (2005). "Neurotoxic effects of 2,3,7,8-tetrachlorodibenzo-p-dioxin in cerebellar granule cells." *Experimental and Molecular Medicine* 37(1): 58-64.

Kim, T. H., et al. (2012). "Comparisons of polybrominated diphenyl ethers levels in paired South Korean cord blood, maternal blood, and breast milk samples." *Chemosphere* 87(1): 97-104.

Kim, T. H., et al. (2009). "Effects of gestational exposure to decabromodiphenyl ether on reproductive parameters, thyroid hormone levels, and neuronal development in sprague-dawley rats offspring." *Journal of Toxicology and Environmental Health - Part A: Current Issues* 72(21-22): 1296-1303.

Kim, Y. R., et al. (2014). "Health consequences of exposure to brominated flame retardants: a systematic review." *Chemosphere* 106: 1-19.

Kimmel, R., et al. (2000). "[Insufficient ventilation as the etiology of illness perception in an elementary school]." *Gesundheitswesen* 62(12): 660-664.

Kimmel, R., et al. (2000). "Pupils' and teachers' health disorders after renovation of classrooms in a primary school." *Gesundheitswesen* 62(12): 660-664.

Kingsley, I. and K. Noriyuki (2012). "DE71 suppresses thyroid hormone-mediated dendritogenesis and neuritogenesis in the developing cerebellum." *Niger J Physiol Sci* 27(2): 123-128.

Kishi, R., et al. (2013). "Ten years of progress in the Hokkaido birth cohort study on environment and children's health: Cohort profile - Updated 2013." *Environmental Health and Preventive Medicine* 18(6): 429-450.

Kitamura, S., et al. (2005). "Anti-thyroid hormonal activity of tetrabromobisphenol A, a flame retardant, and related compounds: Affinity to the mammalian thyroid hormone receptor, and effect on tadpole metamorphosis." *Life Sci* 76(14): 1589-1601.

- Kitanaka, N., et al. (2014). Agmatine attenuates methamphetamine-induced hyperlocomotion and stereotyped behavior in mice. *Behav Pharmacol.* 25: 158-165. [Behavioural pharmacology].
- Klein, R., et al. (2014). "Relation of smoking, drinking, and physical activity to changes in vision over a 20-year period: the Beaver Dam Eye Study." *Ophthalmology* 121(6): 1220-1228.
- Klopocki, E., et al. (2010). "Deletion and point mutations of PTHLH cause brachydactyly type E." *Am J Hum Genet* 86(3): 434-439.
- Klopocki, E., et al. (2010). "Brachydactyly type e (BDE) due to deletion and point mutations of PTHLH (parathyroid hormone-like hormone)." *Medizinische Genetik* 22(1): 89-90.
- Klopocki, E., et al. (2013). "Mutational analysis of the PRKAR1A and PDE4D genes in patients with acrodysostosis and brachydactyly type E." *Medizinische Genetik* 25(1): 126.
- Knouse, L. E., et al. (2014). "Executive functioning difficulties as predictors of academic performance: Examining the role of grade goals." *Learning and Individual Differences* 36: 19-26.
- Kobinger, W. and L. Pichler (1975). "The central modulatory effect of clonidine on the cardiodepressor reflex after suppression of synthesis and storage of noradrenaline." *Eur J Pharmacol* 30(1): 56-62.
- Koch, C., et al. (2015). "Review of hexabromocyclododecane (HBCD) with a focus on legislation and recent publications concerning toxicokinetics and -dynamics." *Environmental Pollution* 199: 26-34.
- Kodavanti, P. R. (2005). "Neurotoxicity of persistent organic pollutants: possible mode(s) of action and further considerations." *Dose Response* 3(3): 273-305.
- Kodavanti, P. R. (2011). "Cell signaling and neurotoxicity: (3)H-arachidonic acid release (phospholipase A(2)) in cerebellar granule neurons." *Methods Mol Biol* 758: 321-328.
- Kodavanti, P. R. (2011). "Cell signaling and neurotoxicity: protein kinase C in vitro and in vivo." *Methods Mol Biol* 758: 307-319.
- Kodavanti, P. R., et al. (2010). "Developmental exposure to a commercial PBDE mixture, DE-71: neurobehavioral, hormonal, and reproductive effects." *Toxicol Sci* 116(1): 297-312.

- Kodavanti, P. R. and M. C. Curras-Collazo (2010). "Neuroendocrine actions of organohalogenes: thyroid hormones, arginine vasopressin, and neuroplasticity." *Front Neuroendocrinol* 31(4): 479-496.
- Kodavanti, P. R. and E. C. Derr-Yellin (2002). "Differential effects of polybrominated diphenyl ethers and polychlorinated biphenyls on [<sup>3</sup>H]arachidonic acid release in rat cerebellar granule neurons." *Toxicol Sci* 68(2): 451-457.
- Kodavanti, P. R., et al. (2014). "Developmental Exposure to a Commercial PBDE Mixture: Effects on Protein Networks in the Cerebellum and Hippocampus of Rats." *Environ Health Perspect*.
- Kodavanti, P. R. and T. R. Ward (2005). "Differential effects of commercial polybrominated diphenyl ether and polychlorinated biphenyl mixtures on intracellular signaling in rat brain in vitro." *Toxicol Sci* 85(2): 952-962.
- Kodavanti, P. R., et al. (2005). "Polybrominated diphenyl ether (PBDE) effects in rat neuronal cultures: 14C-PBDE accumulation, biological effects, and structure-activity relationships." *Toxicol Sci* 88(1): 181-192.
- Kodavanti, P. R. S., et al. (2011). "Aroclor 1254, a developmental neurotoxicant, alters energy metabolism- and intracellular signaling-associated protein networks in rat cerebellum and hippocampus." *Toxicology and Applied Pharmacology* 256(3): 290-299.
- Koenig, C. M., et al. (2012). "Maternal transfer of BDE-47 to offspring and neurobehavioral development in C57BL/6J mice." *Neurotoxicol Teratol* 34(6): 571-580.
- Kohler, M., et al. (2008). "Temporal trends, congener patterns, and sources of Octa-, Nona-, and decabromodiphenyl ethers (PBDE) and hexabromocyclododecanes (HBCD) in Swiss lake sediments." *Environmental Science & Technology* 42(17): 6378-6384.
- Kohyama, J., et al. (1988). "A case of dandy-walker malformation consideration on the teratogenic period and sleep structures." *Brain Dev* 10(6): 392-396.
- Koibuchi, N. (2011). "Developmental neurotoxicology of environmental chemicals by disruption of thyroid hormone action." *Japanese Journal of Animal Psychology* 61(1): 15-21.
- Koistinen, T., et al. (2008). "Blue foxes' (*Alopex lagopus*) preferences between earth floor and wire mesh floor." *Applied Animal Behaviour Science* 111(1-2): 38-53.
- Komarovski, Y. (2006). "Reburying the treasure - maintaining the continuity: Two texts by Sakya Mchog Ldan on the Buddha-essence." *Journal of Indian Philosophy* 34(6): 521-570.

- Koren, G., et al. (2014). Foetal alcohol spectrum disorder: identifying the neurobehavioural phenotype and effective interventions. *Curr Opin Psychiatry*. 27: 98-104. [Current opinion in psychiatry].
- Korzhova, V. V., et al. (2014). "[Huntington's disease: cellular and molecular basis of pathology]." *Zhurnal vysshe? nervno? deiatelnosti imeni I P Pavlova* 64(4): 359-375.
- Kramarova, L. and M. Mrciak (1973). NEST MITES OF SMALL MAMMALS IN THE WESTERN CARPATHIANS.
- Krysiak-Baltyn, K., et al. (2012). "Association between chemical pattern in breast milk and congenital cryptorchidism: modelling of complex human exposures." *Int J Androl* 35(3): 294-302.
- Kudlowitz, D. and F. Muggia (2014). "Clinical features of taxane neuropathy." *Anticancer Drugs*. 25(5): 495-501. [Anti-cancer drugs].
- Kuila, T., et al. (2012). Polyolefin-based polymer nanocomposites. Cambridge, Woodhead Publ Ltd.
- Kuiper, R. V., et al. (2007). "Long-term exposure of European flounder (*Platichthys flesus*) to the flame-retardants tetrabromobisphenol A (TBBPA) and hexabromocyclododecane (HBCD)." *Ecotoxicology and Environmental Safety* 67(3): 349-360.
- Kuiper, R. V., et al. (2007). "Toxicity of tetrabromobisphenol A (TBBPA) in zebrafish (*Danio rerio*) in a partial life-cycle test." *Arch Toxicol* 81(1): 1-9.
- Kumar, L., et al. (2010). "Instantaneous, Facile and Selective Synthesis of Tetrabromobisphenol A using Potassium Tribromide: An Efficient and Renewable Brominating Agent." *Organic Process Research & Development* 14(1): 174-179.
- Kumar, S., et al. (2007). "Regenerable chain-breaking 2,3-dihydrobenzo[b]selenophene-5-ol antioxidants." *Journal of Organic Chemistry* 72(7): 2583-2595.
- Kumari, K., et al. (2014). "Investigation of polybrominated diphenyl ethers in old consumer products in India." *Environ Monit Assess* 186(5): 3001-3009.
- Kurebayashi, H., et al. (1985). "Metabolism and disposition of the flame retardant plasticizer, Tri-p-cresyl phosphate, in the rat." *Toxicology and Applied Pharmacology* 77(3): 395-404.
- Kuriyama, S. N. and I. Chahoud (2003). "Hyperactivity in rat offspring after in utero exposure to a low dose of 2,2',4,4',5-penta-bde (pbde 99)." *Reprod Toxicol* 17(4): 496-497.



Kuriyama, S. N., et al. (2004). "Exposure To An Environmentally Relevant Dose Of PBDE 99 Disrupts Thyroid Hormone Homeostasis And Causes Neurobehavior Disturbances In Rat Offspring." *Toxicologist* 78(1-S): 393.

Kuriyama, S. N., et al. (2004). "In utero and lactational exposures to low dose PBDE 47 cause neurobehavior disturbances in rat offspring." *Birth Defects Research* 70(5): 249.

Kuriyama, S. N., et al. (2005). "Developmental exposure to low dose PBDE 99: effects on male fertility and neurobehavior in rat offspring." *Environ Health Perspect* 113(2): 149-154.

Kuroki, Y. and Y. Fukushima (1985). "Factors influencing the incidence of malformations." 1984 Annual Meeting of the Research Team on Mental Retardation and Brain Damage, Todofuken Kaikan, Japan, Feb. 1-2, 1985. *Brain Dev* 7(5): 1986).

Lacey, L. A., et al. (2010). "Post-application of anti-desiccant agents improves efficacy of entomopathogenic nematodes in formulated host cadavers or aqueous suspension against diapausing codling moth larvae (Lepidoptera: Tortricidae)." *Biocontrol Science and Technology* 20(9): 909-921.

Lam, J. C., et al. (2007). "Assessment of polybrominated diphenyl ethers in eggs of waterbirds from South China." *Environ Pollut* 148(1): 258-267.

Lamy, E., et al. (2009). "Mustard intake reduces benzo a pyrene diolepoxide- and hydrogen peroxide-induced DNA damage in human blood." *Naunyn-Schmiedeberg's Archives of Pharmacology* 379(Suppl. 1): 75.

Landrigan, P. J. (2004). "Washington, DC March 12, 2004."

LANDRIGAN, P. J. and R. A. ETZEL (2013). "The Chemical Environment and Children's Health." *Textbook of Children's Environmental Health*: 28.

Landrigan, P. J., et al. (2012). "A research strategy to discover the environmental causes of autism and neurodevelopmental disabilities." *Environmental Health Perspectives* 120(7): A258-A260.

Langer, P. (2010). "The impacts of organochlorines and other persistent pollutants on thyroid and metabolic health." *Frontiers in Neuroendocrinology* 31(4): 497-518.

Langner, B. (1984). "COMPARATIVE STUDIES ON THE LEARNING POTENTIAL OF THE INBRED RAT BREEDS BDE/HAN AND DA/HAN." *Deutsche Tierarztliche Wochenschrift* 91(5): 205-206.

Langner, B. and M. Stascheit-Langner (1987). "INVESTIGATIONS COMPARING THE LEARNING ABILITY OF THE RAT STRAINS BDE-HAN AND DA-HAN." *Zoologische Beitrage* 31(1): 1-32.

- Lanphear, B. P. (2012). "Attention-deficit/hyperactivity disorder: A preventable epidemic?" *Archives of Pediatrics and Adolescent Medicine* 166(12): 1182-1184.
- Lanphear, B. P. (2015). The impact of toxins on the developing brain. 36: 211-230.
- Lasalle, J. M. (2006). Epigenetic Interaction of MECP2 and Organic Pollutants in Neurodevelopment. RePORTER Database National Institutes of Health.
- Lasalle, J. M. (2007). Epigenetic Interaction of MECP2 and Organic Pollutants in Neurodevelopment. RePORTER Database National Institutes of Health.
- Lasalle, J. M. (2008). Epigenetic Interaction of MECP2 and Organic Pollutants in Neurodevelopment. RePORTER Database National Institutes of Health.
- Lasalle, J. M. (2009). Epigenetic Interaction of MECP2 and Organic Pollutants in Neurodevelopment. RePORTER Database National Institutes of Health.
- LaSalle, J. M. (2011). "A genomic point-of-view on environmental factors influencing the human brain methylome." *Epigenetics* 6(7): 862-869.
- Lasalle, J. M. (2012). Methylomic and genomic impacts of organic pollutants in Dup15q syndrome. RePORTER Database National Institutes of Health.
- Lasalle, J. M. (2013). Methylomic and genomic impacts of organic pollutants in Dup15q syndrome. RePORTER Database National Institutes of Health.
- Lasalle, J. M. (2013). Project 2: Perinatal Epigenetic Signature of Environmental Exposure. RePORTER Database National Institutes of Health.
- LaSalle, J. M., et al. (2011). "The epigenetic interface of genetic and environmental risk factors in the etiology of Autism." *Environmental and Molecular Mutagenesis* 52: S18.
- Lateef, H., et al. (2008). "Extraction of components of composite materials: Ionic liquids in the extraction of flame retardants from plastics." *Journal of Chemical Technology and Biotechnology* 83(4): 541-545.
- Lawley, P. D. (1994). Historical origins of current concepts of carcinogenesis. Vande Woude, G. F. And G. Klein (Ed.). *Advances in Cancer Research*, Vol. 65. Foundations in Cancer Research. Xi+235p. Academic Press, Inc.: San Diego, California, USA; London, England, Uk. Isbn 0-12-006665-3.; 0 (0). 1994. 17-111.
- Le Cann, P., et al. (2011). "Indoor environment and children's health: Recent developments in chemical, biological, physical and social aspects." *International Journal of Hygiene and Environmental Health* 215(1): 1-18.

- Leasi, F., et al. (2009). "First description of the serotonergic nervous system in a bdelloid rotifer: *Macrotrachela quadricornifera* Milne 1886 (Philodinidae)." *Zoologischer Anzeiger* 248(1): 47-55.
- Lebetkin, E. H., et al. (2005). "Disposition Of 2, 2' , 4, 4' , 5, 5' - Hexabromodiphenyl Ether In F344 Rats And B6C3F1 Mice." *Toxicol Sci* 84(1-S): 252.
- Lederman, S. A., et al. (2004). "The Effect Of The Wtc Tragedy On Pregnancy Outcomes." *Epidemiology* 15(4): S186.
- Lee, H. J., et al. (2012). "Genotoxicity and development effects of brominated flame retardant PBDEs and UV-exposed PBDEs on grass shrimp (*Palaemonetes pugio*) embryo." *Marine Pollution Bulletin* 64(12): 2892-2895.
- Lee, I. and H. Viberg (2013). "A single neonatal exposure to perfluorohexane sulfonate (PFHxS) affects the levels of important neuroproteins in the developing mouse brain." *Neurotoxicology* 37: 190-196.
- Legler, J. (2008). "New insights into the endocrine disrupting effects of brominated flame retardants." *Chemosphere* 73(2): 216-222.
- Legler, J. and A. Brouwer (2003). "Are brominated flame retardants endocrine disruptors?" *Environ Int* 29(6): 879-885.
- Lehner, A. F., et al. (2010). "Organophosphate ester flame retardant-induced acute intoxications in dogs." *J Med Toxicol* 6(4): 448-458.
- Leijs, M. M., et al. (2012). Thyroid hormone metabolism and environmental chemical exposure. *Environ Health*. 2012; 11 Suppl 1:S10. [Environmental health : a global access science source].
- Leino, O., et al. (2013). "Pollutant concentrations in placenta." *Food and Chemical Toxicology* 54: 59-69.
- Lema, S. C., et al. (2008). "Dietary exposure to 2,2',4,4'-tetrabromodiphenyl ether (PBDE-47) alters thyroid status and thyroid hormone-regulated gene transcription in the pituitary and brain." *Environ Health Perspect* 116(12): 1694-1699.
- Lema, S. C., et al. (2007). "Neural defects and cardiac arrhythmia in fish larvae following embryonic exposure to 2,2',4,4'-tetrabromodiphenyl ether (PBDE 47)." *Aquatic Toxicology* 82(4): 296-307.
- Lemberger, L., et al. (1978). "Pharmacologic effects in man of a specific serotonin-reuptake inhibitor." *Science* 199(4327): 436-437.

- Leng, S., et al. (2008). "Association between common genetic variation in Cockayne syndrome A and B genes and nucleotide excision repair capacity among smokers." *Cancer Epidemiology Biomarkers and Prevention* 17(8): 2062-2069.
- Leon-Olea, M., et al. (2014). "Current concepts in neuroendocrine disruption." *General and Comparative Endocrinology* 203: 158-173.
- Leon-Olea, M., et al. (2012). "Neurotoxic environmental contaminants near our daily life." *Salud Mental* 35(5): 395-403.
- Letcher, R. J. and P. A. Behnisch (2003). "The state-of-the science and trends of brominated flame retardants in the environment: Present knowledge and future directions." *Environment International* 29(6): 663-664.
- Letcher, R. J., et al. (2010). "Exposure and effects assessment of persistent organohalogen contaminants in arctic wildlife and fish." *Science of the Total Environment* 408(15): 2995-3043.
- Leveque, J. (2016). "Tricresyl Phosphates." *Encyclopaedia of Occupational Health and Safety* 2(4): 1983-1983.
- Lewis, P. D. and J. M. Parry (2004). "In silico p53 mutation hotspots in lung cancer." *Carcinogenesis (Oxford)* 25(7): 1099-1107.
- Li, A., et al. (2007). "Debromination of decabrominated diphenyl ether by resin-bound iron nanoparticles." *Environ Sci Technol* 41(19): 6841-6846.
- Li, B., et al. (2006). "Gene transfer of acetylcholinesterase protects the knockout mouse from the toxicity of DFP." *J Mol Neurosci* 30(1-2): 79-80.
- Li, C. C., et al. (2014). "The association between prenatal exposure to organochlorine pesticides and thyroid hormone levels in newborns in Yancheng, China." *Environmental Research* 129: 47-51.
- Li, D., et al. (2001). "In vitro BPDE-induced DNA adducts in peripheral lymphocytes as a risk factor for squamous cell carcinoma of the head and neck." *International Journal of Cancer* 93(3): 436-440.
- Li, F. X., et al. (2010). "Oxidation of atomic gold ions: thermochemistry for the activation of O(2) and N(2)O BY Au(+) ((1)S(0) and (3)D)." *J Phys Chem A* 114(42): 11043-11052.
- Li, H. Z., et al. (2012). "A Promising Tool to Achieve Chemical Accuracy for Density Functional Theory Calculations on Y-NO Homolysis Bond Dissociation Energies." *Int J Mol Sci* 13(7): 8051-8070.

- Li, H. Z., et al. (2013). "An Accurate and Efficient Method to Predict Y-NO Bond Homolysis Bond Dissociation Energies." *Mathematical Problems in Engineering*: 10.
- Li, J., et al. (2014). "Occurrence of organophosphate flame retardants in drinking water from China." *Water Res* 54: 53-61.
- Li, L. X., et al. (2014). "Development of A Reference Dose for BDE-47, 99, and 209 Using Benchmark Dose Methods." *Biomed Environ Sci* 27(9): 733-739.
- Li, M., et al. (2014). "Toxic effects of decabromodiphenyl ether (BDE-209) on human embryonic kidney cells." *Front Genet* 5: 118.
- Li, M., et al. (2014). "Toxic effects of decabromodiphenyl ether (bde-209) on human embryonic kidney cells." *Frontiers in Immunology* 5(JUN).
- Li, M. K. Y., et al. (2009). "An organically modified silicate molecularly imprinted solid-phase microextraction device for the determination of polybrominated diphenyl ethers." *Analytica Chimica Acta* 633(2): 197-203.
- Li, T., et al. (2013). "A hydroxylated metabolite of flame-retardant PBDE-47 decreases the survival, proliferation, and neuronal differentiation of primary cultured adult neural stem cells and interferes with signaling of ERK5 MAP kinase and neurotrophin 3." *Toxicol Sci* 134(1): 111-124.
- Li, W. and J. E. Casida (1997). "Actions of two highly potent organophosphorus neuropathy target esterase inhibitors in mammalian cell lines." *Toxicol Lett* 92(2): 123-130.
- Li, W. and J. E. Casida (1998). "Organophosphorus neuropathy target esterase inhibitors selectively block outgrowth of neurite-like and cell processes in cultured cells." *Toxicol Lett* 98(3): 139-146.
- Li, X., et al. (2013). "Preparation and Characterization of Cube-Like Magnesium Hydroxide by Gaseous Ammonia Bubbling." *Asian Journal of Chemistry* 25(1): 401-404.
- Li, X., et al. (2008). "Photodegradation of 2,2',4,4'-tetrabromodiphenyl ether in nonionic surfactant solutions." *Chemosphere* 73(10): 1594-1601.
- Li, X. Y., et al. (2013). "Improving the Fire Performance of Nylon 6,6 Fabric by Chemical Grafting with Acrylamide." *Industrial & Engineering Chemistry Research* 52(6): 2290-2296.
- Li, Z. Q. and R. J. Yang (2014). "Optimal Synthesis and Sulfonylation Mechanism of a Novel Polyhedral Oligomeric Octadiphenylsulfonylsilsesquioxane." *Chinese Journal of Organic Chemistry* 34(11): 2338-2344.

Liang, B., et al. (2013). Study on the Synthesis of Micron-sized Magnesium Hydroxide Flame Retardant by Using a Gaseous Ammonia Bubbling Method. *Advances in Textile Engineering and Materials III, Pts 1 and 2*. L. Zheng, S. Skuroda, H. Liu et al. Stafa-Zurich, Trans Tech Publications Ltd. 821-822: 1341-1345.

Liang, H. C., et al. (2013). "Pesticides and herbicides." *Water Environment Research* 85(10): 1601-1645.

Liang, S. X., et al. (2010). "Effects of repeated exposure to decabrominated diphenyl ether (BDE-209) on mice nervous system and its self repair." *Environ Toxicol Pharmacol* 29(3): 297-301.

Liao, C. Y., et al. (2008). "Effect of polybrominated diphenyl ether on development of cultured hippocampal neuron." *Science in China Series B-Chemistry* 51(1): 62-68.

Lilienthal and H. G. Hellmuth, Eds. (2010). *Effect profiles of different brominated flame retardants in neurobehavioral and endocrine studies*. Chemical Engineering Methods and Technology. New York, NY, Nova Science Publishers.

Lilienthal, H., et al. (2003). "Effects of developmental exposure to pcbs and pbde on sex-dependent behavior in rats." *Reprod Toxicol* 17(4): 481-482.

Lilienthal, H., et al. (2006). Effects of developmental exposure to 2,2 ,4,4 ,5-pentabromodiphenyl ether (PBDE-99) on sex steroids, sexual development, and sexually dimorphic behavior in rats. *Environ Health Perspect.* 114: 194-201. (Levesque et al.).

Lilienthal, H., et al. (2005). "Developmental and neurobehavioral effects of maternal exposure to PBDE 99." *Environmental Research* 98(3): 412.

Lilienthal, H., et al. (2004). "Developmental Neurotoxicity Of Polybrominated Diphenylethers (PBDE): Steroid-Dependent Behavior, Sexual Development And Circulating Steroids." *Toxicologist* 78(1-S): 392.

Lilienthal, H., et al. (2002). "Developmental exposure to halogenated hydrocarbons in rats: effects on sexual differentiation of the brain and sex dependent behavior." *Reprod Toxicol* 16(4): 415-416.

Lilienthal, H., et al. (2015). "Developmental exposure to purity-controlled polychlorinated biphenyl congeners (PCB74 and PCB95) in rats: Effects on brainstem auditory evoked potentials and catalepsy." *Toxicology* 327: 22-31.

Lilienthal, H., et al. (2005). "Developmental neurotoxicity of PHAHs: Endocrine-mediated and general behavioral endpoints in adult male rats." *Environ Toxicol Pharmacol* 19(3): 757-759.

Lilienthal, H., et al. (2009). "Neurobehavioral Effects in Relation to Endocrine Alterations Caused by Exposure to Brominated Flame Retardants in Rats-Comparison to Polychlorinated Biphenyls." *Human and Ecological Risk Assessment* 15(1): 76-86.

Lilienthal, H., et al. (2007). "Auditory and neurobehavioral effects of exposure to brominated flame retardants in rats&#151;Evaluation of benchmark doses." *Reprod Toxicol* 24(1): 61.

Lilienthal, H., et al. (2009). "Effects of the brominated flame retardant hexabromocyclododecane (HBCD) on dopamine-dependent behavior and brainstem auditory evoked potentials in a one-generation reproduction study in Wistar rats." *Toxicol Lett* 185(1): 63-72.

Lilienthal, H., et al. (2008). "Exposure to tetrabromobisphenol A (TBBPA) in Wistar rats: neurobehavioral effects in offspring from a one-generation reproduction study." *Toxicology* 246(1): 45-54.

Lilienthal, H. H. G. (2010). *EFFECT PROFILES OF DIFFERENT BROMINATED FLAME RETARDANTS IN NEUROBEHAVIORAL AND ENDOCRINE STUDIES*. Hauppauge, Nova Science Publishers, Inc.

Lim, Y. W., et al. (2014). "Exposure assessment and health risk of poly-brominated diphenyl ether (PBDE) flame retardants in the indoor environment of elementary school students in Korea." *Science of the Total Environment* 470: 1376-1389.

Lima Ede, P. and A. A. Assuncao (2011). "[Prevalence and factors associated with Posttraumatic Stress Disorder (PTSD) in emergency workers: a systematic literature review]." *Rev Bras Epidemiol* 14(2): 217-230.

Limburg, T. and J. W. Einax (2013). "Determination of bromine using high-resolution continuum source molecular absorption spectrometry in a graphite furnace." *Microchemical Journal* 107(Sp. Iss. SI): 31-36.

Lin, C. H., et al. (2000). "Synthesis and properties of phosphorus-containing advanced epoxy resins. II." *Journal of Applied Polymer Science* 78(1): 228-235.

Lin, T. J., et al. (2001). "Fatal poisoning by butachlor and chlornitrofen ingested from a bottle marked as nitrofen." *Vet Hum Toxicol* 43(4): 212-214.

Lin, Y. P., et al. (2013). "Simultaneous determination of polybrominated diphenyl ethers and polychlorinated biphenyls by gas chromatography-tandem mass spectrometry in human serum and plasma." *Talanta* 113: 41-48.

Linares, V., et al. (2015). "Human exposure to PBDE and critical evaluation of health hazards." *Arch Toxicol* 89(3): 335-356.

- Linsinger, T. P., et al. (2008). "Results of an interlaboratory comparison on the determination of polybrominated flame retardants in poly(ethyleneterephthalate)." *Anal Bioanal Chem* 390(1): 399-409.
- Little, E. E., et al. (2002). "Behavioral Avoidance/Attractance Response of Rainbow Trout to Fire-Retardant Chemicals." *Govt Reports Announcements & Index*(05): 42.
- Liu, J., et al. (2006). "Quality of life analyses in a clinical trial of DPPE (tesmilifene) plus doxorubicin versus doxorubicin in patients with advanced or metastatic breast cancer: NCIC CTG Trial MA.19." *Breast Cancer Res Treat* 100(3): 263-271.
- Liu, L. Y., et al. (2014). "Halogenated flame retardants in baby food from the United States and from China and the estimated dietary intakes by infants." *Environ Sci Technol* 48(16): 9812-9818.
- Liu, M. L., et al. (2015). "Tri-ortho-cresyl phosphate induces autophagy of rat spermatogonial stem cells." *Reproduction* 149(2): 163-170.
- Liu, S., et al. (2014). The influence of dopamine & beta;-hydroxylase gene polymorphism rs1611115 on levodopa/carbidopa treatment for cocaine dependence: a preliminary study. *Pharmacogenet Genomics*. 24: 370-373. [Pharmacogenetics and genomics].
- Liu, X. X., et al. (2011). Study on Temperature Response and Thermal Protection of Shape Memory Combination fabrics. *Textile Bioengineering and Informatics Symposium Proceedings, Vols 1-3*. Y. Li, Y. F. Liu, X. N. Luo and J. S. Li. Hong Kong Sar, Textile Bioengineering & Informatics Society Ltd: 232-238.
- Liu, Y. N., et al. (2000). "Synthesis of mono( 1-chloride-2-hydroxy propyl)phosphate and antimony mono( 1-chloride-2-hydroxy propyl)phosphate." *Transactions of Nonferrous Metals Society of China* 10(5): 691-694.
- Liu, Z., et al. (2012). "Empirical evaluation of scoring functions for Bayesian network model selection." *BMC Bioinformatics* 13 Suppl 15: S14.
- Llansola, M., et al. (2007). "Prenatal exposure to polybrominated diphenylether 99 enhances the function of the glutamate-nitric oxide-cGMP pathway in brain in vivo and in cultured neurons." *Eur J Neurosci* 25(2): 373-379.
- Llansola, M., et al. (2009). "Increasing the function of the glutamate-nitric oxide-cyclic guanosine monophosphate pathway increases the ability to learn a Y-maze task." *J Neurosci Res* 87(10): 2351-2355.
- Lloyd-Smith, M. and B. Sheffield-Brotherton (2008). *Children's Environmental Health: Intergenerational Equity in Action-A Civil Society Perspective*. Environmental Challenges in the Pacific Basin. D. O. Carpenter. Oxford, Blackwell Publishing. 1140: 190-200.



Lo, C., et al. (2011). "The internet fosters collaborations among college and pre-college students and research scientists." *Molecular Biology of the Cell* 22(24).

Logeswaran, R. (2012). "Improved biliary detection and diagnosis through intelligent machine analysis." *Comput Methods Programs Biomed* 107(3): 404-412.

Logsdon, J. M. (2008). Meiotic genes in sexual and asexual rotifers. RePORTER Database National Institutes of Health.

Lopez-Carrillo, L. and M. E. Cebrian (2013). *Cognitive Function*, Blackwell Science Publ, Osney Mead, Oxford OX2 0el, UK.

Lubick, N. (2011). "Advising parents in the face of scientific uncertainty: An environmental health dilemma." *Environmental Health Perspectives* 119(10): 437-441.

Lund, J. and L. E. Aaro (2004). "Accident prevention. Presentation of a model placing emphasis on human, structural and cultural factors." *Safety Science* 42(4): 271-324.

Luo, J., et al. (2013). "Theoretical study on the radical anions and reductive dechlorination of selected polychlorinated dibenzo-p-dioxins." *Chemosphere* 91(6): 765-770.

Luo, W., et al. (2014). "Study of different-sized sulfur-free expandable graphite on morphology and properties of water-blown semi-rigid polyurethane foams." *Rsc Advances* 4(70): 37302-37310.

Luthe, G., et al. (2008). "Receptor interactions by polybrominated diphenyl ethers versus polychlorinated biphenyls: a theoretical Structure-activity assessment." *Environ Toxicol Pharmacol.* 25(2): 202-210. [Environmental toxicology and pharmacology].

Lv, Q. Y., et al. (2015). "In vitro immune toxicity of polybrominated diphenyl ethers on murine peritoneal macrophages: apoptosis and immune cell dysfunction." *Chemosphere* 120: 621-630.

Lyall, K., et al. (2014). "Maternal lifestyle and environmental risk factors for autism spectrum disorders." *International Journal of Epidemiology* 43(2): 443-464.

Lyche, J. L., et al. (2015). "Human health risk associated with brominated flame-retardants (BFRs)." *Environ Int* 74: 170-180.

Ma, L. Z., et al. (2012). Recycling Of the Epoxy Resin of the Waste Printed Circuit Boards Using Solvent Extraction. *Manufacturing Science and Technology*, Pts 1-8. W. Fan. Stafa-Zurich, Trans Tech Publications Ltd. 383-390: 3140-3144.

Maalouf, F. T., et al. (2010). "Impaired sustained attention and executive dysfunction: bipolar disorder versus depression-specific markers of affective disorders." *Neuropsychologia* 48(6): 1862-1868.

Mackay, W. P., et al. (1987). "DIURNAL ACTIVITY PATTERNS AND VERTICAL MIGRATION IN DESERT SOIL MICROARTHROPODS." *Pedobiologia* 30(1): 65-71.

MacPhail, R., et al. (2003). "Lack of effect of perinatal exposure to a polybrominated diphenyl ether mixture (DE-71) on the habituation of motor activity in adult rats." *Toxicological Sciences* 72(S-1): 123.

Madia, F., et al. (2004). "Differential in vitro neurotoxicity of the flame retardant PBDE-99 and of the PCB Aroclor 1254 in human astrocytoma cells." *Toxicol Lett* 154(1-2): 11-21.

Maervoet, J., et al. (2004). "A reassessment of the nomenclature of polychlorinated biphenyl (PCB) metabolites." *Environ Health Perspect* 112(3): 291-294.

Magnusson, U. and K. Ljungvall (2014). "Environmental pollutants and dysregulation of male puberty-A comparison among species." *Reproductive Toxicology* 44: 23-32.

Maia, L., et al. (2013). "Csf beta-amyloid 42 and t-tau profile in murine models of cerebral betaamyloidosis." *Alzheimer's and Dementia* 9(4): P831-P832.

Mailloux, R. J., et al. (2014). "Exposure to a Northern Contaminant Mixture (NCM) Alters Hepatic Energy and Lipid Metabolism Exacerbating Hepatic Steatosis in Obese JCR Rats." *PLoS One* 9(9): e106832.

Main, K. (2007). "Testicular function in newborn boys and fetal exposure to endocrine disrupters." *Early Human Development* 83(Suppl. 1): S35.

Main, K. M. (2009). "ENDOCRINE DISRUPTERS AND HUMAN DEVELOPMENT." *Journal of Andrology* 30(Suppl. S): 24-25.

Main, K. M., et al. (2010). "Genital anomalies in boys and the environment." *Best Pract Res Clin Endocrinol Metab* 24(2): 279-289.

Main, K. M., et al. (2010). "Effects of chemical exposures on human male reproduction." *International Journal of Andrology* 33(Suppl. 1): 30.

Maire, P., et al. (2005). "Chiral rhodium(I) and iridium(I) amino-olefin complexes: pK(a), N-H bond dissociation energy, and catalytic transfer hydrogenation." *Organometallics* 24(13): 3207-3218.

Malick, J. B. and A. Barnett (1976). "The role of serotonergic pathways in isolation-induced aggression in mice." *Pharmacol Biochem Behav* 5(1): 55-61.

Manchester-Neesvig, J. B., et al. (2001). Comparison of polybrominated diphenyl ethers (PBDEs) and polychlorinated biphenyls (PCBs) in Lake Michigan salmonids. *Environ Sci Technol.* 35: 1072-1077. [Environmental science & technology].

Mancia, A., et al. (2014). "Machine learning approaches to investigate the impact of PCBs on the transcriptome of the common bottlenose dolphin (*Tursiops truncatus*)." *Mar Environ Res* 100: 57-67.

Mansour, S. A. (2011). Chemical Pollutants Threatening Food Safety and Security: An Overview. *Advances in Food Protection: Focus on Food Safety and Defense*. M. Hefnawy, Springer, Po Box 17, 3300 Aa Dordrecht, Netherlands: 73-117.

Mansouri, K., et al. (2012). "Assessing bioaccumulation of polybrominated diphenyl ethers for aquatic species by QSAR modeling." *Chemosphere* 89(4): 433-444.

Mansur Bde, M., et al. (2012). Effects of mercury chloride (HgCl<sub>2</sub>) on *Betta splendens* aggressive display. *Span J Psychol.* 15: 442-450. [The Spanish journal of psychology].

Mantovani, A. (2006). Risk assessment of endocrine disrupters - The role of toxicological studies. *Living in a Chemical World: Framing the Future in Light of the Past*. M. A. Mehlman, M. Soffritti, P. Landrigan, E. Bingham and F. Belpoggi. Oxford, Blackwell Publishing. 1076: 239-252.

Marcus, M. (2010). Brominated Flame Retardants: Multigenerational Endocrine Disruption? RePORTER Database National Institutes of Health.

Marcus, M. (2011). Brominated Flame Retardants: Multigenerational Endocrine Disruption? RePORTER Database National Institutes of Health.

Marcus, M. (2012). Brominated Flame Retardants: Multigenerational Endocrine Disruption? RePORTER Database National Institutes of Health.

Marcus, M. (2013). Brominated Flame Retardants: Multigenerational Endocrine Disruption? RePORTER Database National Institutes of Health.

Marcus, M. and H. Michels Blanck (2006). "Human and animal studies of pubertal development following prenatal exposure to PBBs." *Neurotoxicol Teratol* 28(3): 417.

Mariani, A., et al. (2015). "Decabrominated diphenyl ether and methylmercury impair fetal nervous system development in mice at documented human exposure levels." *Dev Neurobiol* 75(1): 23-38.

Marijana, C., et al. (2010). "Toxicological relevance and potential risk due to polybrominated diphenylethers exposure." *Arhiv za Farmaciju* 60(3): 311-322.

- Marinotti, O., et al. (2013). The genome of *Anopheles darlingi*, the main neotropical malaria vector. *Nucleic Acids Res.* 41: 7387-7400. [Nucleic acids research].
- Mariussen, E. (2012). "Neurotoxic effects of perfluoroalkylated compounds: mechanisms of action and environmental relevance." *Archives of Toxicology* 86(9): 1349-1367.
- Mariussen, E. and F. Fonnum (2003). "The effect of brominated flame retardants on neurotransmitter uptake into rat brain synaptosomes and vesicles." *Neurochem Int* 43(4-5): 533-542.
- Mariussen, E. and F. Fonnum (2006). "Neurochemical targets and behavioral effects of organohalogen compounds: an update." *Crit Rev Toxicol* 36(3): 253-289.
- Markelova, N. Y. (2007). "Survival strategy of *Bdellovibrio*." *Microbiology* 76(6): 769-774.
- Markowski, V. P. (2007). "Report of the 26th annual meeting of the behavioral toxicology society." *Neurotoxicology and Teratology* 29(5): 586-587.
- Markowski, V. P. (2007). "Thyroid disruption and behavioral impairments following developmental exposure to PBDEs: correlative or causative relationship?" *Neurotoxicology and Teratology* 29(3): 413.
- Marney, D. C. O., et al. (2007). "Mechanistic analysis of the fire performance of a fire retardant system." *Journal of Fire Sciences* 25(6): 471-497.
- Marques-Pinto, A. and D. Carvalho (2013). "Human infertility: Are endocrine disruptors to blame?" *Endocrine Connections* 2(3): R15-R29.
- Marrs, T. C. (1993). "Organophosphate poisoning." *Pharmacology and Therapeutics* 58(1): 51-66.
- Marsili, L., et al. (2010). "MICA expression as toxicological stress marker in fibroblast cell cultures of cetaceans." *Comparative Biochemistry and Physiology - A Molecular and Integrative Physiology* 157: S24-S25.
- Marteinson, S., et al. (2010). "Changes in courtship and brood-rearing behaviour accompany reproductive changes in American kestrels (*Falco sparverius*) exposed to environmentally relevant concentrations of technical hexabromocyclododecane (HBCD)." *Canadian Technical Report of Fisheries and Aquatic Sciences* 2883: 20.
- Marteinson, S. C., et al. (2012). "Dietary exposure to technical hexabromocyclododecane (HBCD) alters courtship, incubation and parental behaviors in American kestrels (*Falco sparverius*)." *Chemosphere* 89(9): 1077-1083.

Marteinson, S. C., et al. (2010). "MULTI-GENERATIONAL EFFECTS OF POLYBROMINATED DIPHENYLEETHERS EXPOSURE: EMBRYONIC EXPOSURE OF MALE AMERICAN KESTRELS (FALCO SPARVERIUS) TO DE-71 ALTERS REPRODUCTIVE SUCCESS AND BEHAVIORS." *Environmental Toxicology and Chemistry* 29(8): 1740-1747.

Martin, M., et al. (2004). "An Asian quandary: Where have all of the PBDEs gone?" *Marine Pollution Bulletin* 49(5-6): 375-382.

Marvin, C. H., et al. (2011). "Hexabromocyclododecane: current understanding of chemistry, environmental fate and toxicology and implications for global management." *Environ Sci Technol* 45(20): 8613-8623.

Massuda, R., et al. (2012). "The staging model of bipolar disorder and cognitive functioning: A comparison with patients with schizophrenia." *Bipolar Disorders* 14: 75.

Masuo, Y. and M. Ishido (2011). "Neurotoxicity of endocrine disruptors: Possible involvement in brain development and neurodegeneration." *Journal of Toxicology and Environmental Health - Part B: Critical Reviews* 14(5-7): 346-369.

Mateos, A. J., et al. (2013). "Continuous immersion system for deposition of multilayer thin-films on film and fabric." *Abstracts of Papers American Chemical Society* 245: 81-IEC.

Matousek, M. (2000). "Rhythmic vigilance changes during normal daytime activity." *Psychiatrie* 4(1): 3-7.

Matsuda, T., et al. (2001). "SEA0400, a novel and selective inhibitor of the Na<sup>+</sup>-Ca<sup>2+</sup> exchanger, attenuates reperfusion injury in the in vitro and in vivo cerebral ischemic models." *J Pharmacol Exp Ther* 298(1): 249-256.

Matsukami, H., et al. (2014). "Pilot-scale incineration of wastes with high content of chlorinated and non-halogenated organophosphorus flame retardants used as alternatives for PBDEs." *Science of the Total Environment* 493: 672-681.

Matsushita, S., et al. (2014). "The impact of the great east Japan earthquake on alcohol, nicotine and hypnotic abuse and gambling in disaster-stricken areas." *Alcohol and Alcoholism* 49: i8.

Matthews, H. B., et al. (1990). "Subchronic toxicity studies indicate that tris(2-chloroethyl)phosphate administration results in lesions in the rat hippocampus." *Toxicol Ind Health* 6(1): 1-15.

Matthews, H. B., et al. (1990). "Subchronic Toxicity Studies Indicate that Tris(2-chloroethyl)phosphate Administration Results in Lesions in the Rat Hippocampus." *Toxicology and Industrial Health* 6(1): 1-15.

Matthews, H. B., et al. (1993). "Toxicity and Carcinogenicity of Chronic Exposure to Tris(2-Chloroethyl)phosphate." *Fundamental and Applied Toxicology* 20(4): 477-485.

Matuszewich, L., et al. (2014). Neurochemical and behavioral effects of chronic unpredictable stress. *Behav Pharmacol.* 25: 557-566. [Behavioural pharmacology].

Mayr, J. F. (1990). "Composites the boeing experience." 75th Annual Meeting of the American College of Occupational Medicine, Houston, Texas, USA, April 28-May 4, 1990. *J Occup Med* 32(4): 380.

Mazdai, A., et al. (2003). "Polybrominated diphenyl ethers in maternal and fetal blood samples." *Environ Health Perspect* 111(9): 1249-1252.

McClain, V., et al. (2012). "BDE 49 and developmental toxicity in zebrafish." *Comp Biochem Physiol C Toxicol Pharmacol* 155(2): 253-258.

McCollum, C. W., et al. (2011). "Developmental toxicity screening in zebrafish." *Birth Defects Research Part C - Embryo Today: Reviews* 93(2): 67-114.

McCormick, J. M., et al. (2010). "Embryonic exposure to tetrabromobisphenol A and its metabolites, bisphenol A and tetrabromobisphenol A dimethyl ether disrupts normal zebrafish (*Danio rerio*) development and matrix metalloproteinase expression." *Aquatic Toxicology* 100(3): 255-262.

McCoul, E. D., et al. (2012). "Balloon dilation of the eustachian tube in a cadaver model: technical considerations, learning curve, and potential barriers." *Laryngoscope* 122(4): 718-723.

McDermott, J. J. and P. Roe (1985). "FOOD FEEDING BEHAVIOR AND FEEDING ECOLOGY OF NEMERTEANS." *American Zoologist* 25(1): 113-126.

McDonald, T. A. (2002). "A perspective on the potential health risks of PBDEs." *Chemosphere* 46(5): 745-755.

McDonald, T. A. (2005). "Polybrominated diphenylether levels among United States residents: daily intake and risk of harm to the developing brain and reproductive organs." *Integr Environ Assess Manag* 1(4): 343-354.

McElgunn, B. (2010). "The Developing Brain: A largely overlooked health endpoint in risk assessments for synthetic chemical substances." *International Journal of Disability, Development and Education* 57(3): 315-330.

McElroy, J. A., et al. (2004). Potential exposure to PCBs, DDT, and PBDEs from sport-caught fish consumption in relation to breast cancer risk in Wisconsin. *Environ Health Perspect.* 112: 156-162. (Levesque et al.).

McGee, S. P., et al. (2012). "Early zebrafish embryogenesis is susceptible to developmental TDCPP exposure." *Environmental Health Perspectives* 120(11): 1585-1591.

McGee, S. P., et al. (2013). "Aryl Phosphate Esters Within a Major PentaBDE Replacement Product Induce Cardiotoxicity in Developing Zebrafish Embryos: Potential Role of the Aryl Hydrocarbon Receptor." *Toxicological Sciences* 133(1): 144-156.

McGregor, D. and D. Anderson (1999). "DNA damage and repair in mammalian cells in vitro and in vivo as indicators of exposure to carcinogens." *IARC Sci Publ* 146: 309-354.

McGregor, W. G., et al. (1995). "Lack of correlation between degree of interference with transcription and rate of strand specific repair in the HPRT gene of diploid human fibroblasts." *Journal of Biological Chemistry* 270(45): 27222-27227.

McLenon, M. and G. Botz (2012). "Reducing blood draws in critically ill patients." *Critical Care Medicine* 40(12): 177-178.

McManus, C., et al. (1978). "Increased binding of [3H]apomorphine in caudate membranes after dopamine pretreatment in vitro." *J Pharm Pharmacol* 30(7): 444-447.

McNamee, H. B., et al. (1975). "Fenmetozole in acute alcoholol intoxication in man." *Clin Pharmacol Ther* 17(6): 735-737.

Meek, M. E. B. (2013). "International experience in addressing combined exposures: Increasing the efficiency of assessment." *Toxicology* 314(2-3): 185-189.

Meeker, J. D. (2012). "Exposure to environmental endocrine disruptors and child development." *Archives of Pediatrics and Adolescent Medicine* 166(10): 952-958.

Meeker, J. D., et al. (2009). "Phthalates and other additives in plastics: human exposure and associated health outcomes." *Philos Trans R Soc Lond B Biol Sci*. 364(1526): 2097-2113. [Philosophical transactions of the Royal Society of London. Series B, Biological sciences].

Meeker, R. B., et al. (2014). The brain and HAART: collaborative and combative connections. *Curr Opin HIV AIDS*. 9: 579-584. [Current opinion in HIV and AIDS].

Meijer, J. and J. W. Depierre (1988). "Cytosolic epoxide hydrolase." *Chem-Biol Interact* 64(3): 207-250.

Meijer, L., et al. (2008). "Serum concentrations of neutral and phenolic organohalogenes in pregnant women and some of their infants in the Netherlands." *Environmental Science & Technology* 42(9): 3428-3433.

Meironyte Guvenius, D., et al. (2003). "Human prenatal and postnatal exposure to polybrominated diphenyl ethers, polychlorinated biphenyls, polychlorobiphenyls, and pentachlorophenol." *Environmental Health Perspectives* 111(9): 1235-1241.

Mentzschel, A., et al. (1993). "Genotoxicity of Neurotoxic Triaryl Phosphates: Identification of DNA Adducts of the Ultimate Metabolites, Saligenin Phosphates." *Chemical Research in Toxicology* 6(3): 294-301.

Meserve, L. A., et al. (1992). "Influence of maternal ingestion of Aroclor 1254 (PCB) or FireMaster BP-6 (PBB) on unstimulated and stimulated corticosterone levels in young rats." *Bull Environ Contam Toxicol* 48(5): 715-720.

Messer, A. (2010). "Mini-review: polybrominated diphenyl ether (PBDE) flame retardants as potential autism risk factors." *Physiol Behav* 100(3): 245-249.

Michaelson, J. J., et al. (2011). "Transcriptional signatures of regulatory and toxic responses to benzo- a -pyrene exposure." *BMC Genomics* 12: 502.

Mikula, P. and Z. Svobodova (2006). "Brominated flame retardants in the environment: Their sources and effects (a review)." *Acta Veterinaria Brno* 75(4): 587-599.

Miller, L. L., et al. (2015). "Effects of the triple monoamine uptake inhibitor amitifadine on pain-related depression of behavior and mesolimbic dopamine release in rats." *Pain*. 156(1): 175-184. [Pain].

Miller, V. M., et al. (2012). "Developmental coexposure to polychlorinated biphenyls and polybrominated diphenyl ethers has additive effects on circulating thyroxine levels in rats." *Toxicological Sciences* 127(1): 76-83.

Miller-Perez, C., et al. (2009). "The polychlorinated biphenyls (PCBS) environmental pollutants and their effects on the Nervous System and health." *Salud Mental* 32(4): 335-346.

Miller-Rhodes, P., et al. (2014). "Prenatal exposure to the brominated flame retardant hexabromocyclododecane (HBCD) impairs measures of sustained attention and increases age-related morbidity in the Long-Evans rat." *Neurotoxicol Teratol* 45: 34-43.

Minaya, O., et al. (2011). "The Benzodiazepine Dependence Questionnaire (BDEPQ): validity and reliability in Mexican psychiatric patients." *Addict Behav* 36(8): 874-877.

Miniero, R., et al. (2011). "Chemometric data analysis application to *Sparus aurata* samples from two offshore farming plants along the Apulian (Italy) coastline." *Chemosphere* 85(3): 465-472.

Miodovnik, A. (2011). "Environmental neurotoxicants and developing brain." *Mount Sinai Journal of Medicine* 78(1): 58-77.



Mitchell, M. M., et al. (2012). "Levels of select PCB and PBDE congeners in human postmortem brain reveal possible environmental involvement in 15q11-q13 duplication autism spectrum disorder." *Environ Mol Mutagen* 53(8): 589-598.

Mitra, C. and S. R. Guha (1978). "Inhibition of monoamine oxidation in subfractions of crude mitochondria of rat brain by clorgyline and Lilly 51641." *Biochem Pharmacol* 27(20): 2455-2457.

Mizukawa, H., et al. (2015). "Organohalogenes and their hydroxylated metabolites in the blood of pigs from an open waste dumping site in south India: Association with hepatic cytochrome P450." *Environmental Research* 138: 255-263.

Mizuno, F., et al. (2012). "A high-throughput screen for environmental chemicals that disrupt oxytocin signaling in brain." *Society for Neuroscience Abstract Viewer and Itinerary Planner* 42.

Mizutani, Y., et al. (2014). "Comparison of the oxidation products produced by tetrahalobisphenol A flame retardants as a result of potassium monopersulfate oxidation with an iron(III)-tetrakis(p-sulfonatophenyl)porphyrin in the presence of humic acid." *J Environ Sci Health A Tox Hazard Subst Environ Eng* 49(4): 365-375.

Mlynarcikova, A., et al. (2014). "Impact of endocrine disruptors on ovarian steroidogenesis." *Endocr Regul* 48(4): 201-224.

Moeckel, C., et al. (2010). "Estimation of the source strength of polybrominated diphenyl ethers based on their diel variability in air in Zurich, Switzerland." *Environ Sci Technol* 44(11): 4225-4231.

Mohammed, S., et al. (2014). "A review on the impact of the environmental adversities on various developmental disorders of brain in children." *International Journal of Pharmacy and Pharmaceutical Sciences* 6(6): 161-164.

Mohler, M. L., et al. (2007). "Non-steroidal glucocorticoid receptor antagonists: The race to replace RU-486 for anti-glucocorticoid therapy." *Expert Opinion on Therapeutic Patents* 17(1): 59-81.

Molander, L. and A. Randrup (1974). "Investigation of the mechanism by which L-DOPA induces gnawing in mice." *Acta Pharmacol Toxicol (Copenh)* 34(5): 312-324.

Mongillo, T. M., et al. (2012). "Predicted polybrominated diphenyl ether (PBDE) and polychlorinated biphenyl (PCB) accumulation in southern resident killer whales." *Marine Ecology Progress Series* 453: 263-277.

- Montie, E., et al. (2006). "Using magnetic resonance imaging (MRI) to obtain volume estimates of cetacean brain regions that depend on thyroid hormones for maturation." *Journal of Experimental Zoology* 305A(2): 157.
- Montie, E. W., et al. (2009). "Organohalogen contaminants and metabolites in cerebrospinal fluid and cerebellum gray matter in short-beaked common dolphins and Atlantic white-sided dolphins from the western North Atlantic." *Environmental Pollution* 157(8-9): 2345-2358.
- Moore, B. S. (2013). Scripps Center for Ocean and Human Health. RePORTER Database National Institutes of Health.
- Morgado, I., et al. (2007). "Disruption of thyroid hormone binding to sea bream recombinant transthyretin by ioxinyl and polybrominated diphenyl ethers." *Chemosphere* 69(1): 155-163.
- Morgan, D. R. and M. Musa (2010). "Self inflicted death following inhalation and ingestion of Builders Polyurethane expandable foam." *J Forensic Leg Med* 17(8): 439-440.
- Morgan, W. W., et al. (1975). "Effect of tryptophan administration on serotonin and 5-hydroxyindoleacetic acid content in the brainstem of Lilly 110140-pretreated rats." *Life Sci* 17(4): 523-529.
- Moriya, F., et al. (1991). "[A case of suicide suspected of poisoning from taking some agricultural chemicals]." *Nihon Hoigaku Zasshi* 45(2): 158-165.
- Morland, K. B., et al. (2005). Body burdens of polybrominated diphenyl ethers among urban anglers. *Environ Health Perspect.* 113: 1689-1692. (Levesque et al.).
- Morrissey, C. A., et al. (2014). "Developmental impairment in eurasian dipper nestlings exposed to urban stream pollutants." *Environmental Toxicology and Chemistry* 33(6): 1315-1323.
- Moser, G. (2012). "Neurotoxicity of brominated flame retardants." Presented at Soc. of Tox. of Canada, December 02 - 04, 2012.
- Moser, V., et al. (2010). "Neurobehavioral development following exposure of male mice to polybrominated diphenyl ether 47 on postnatal day 10." *Neurotoxicology and Teratology* 32(4): 503.
- Moser, V. C., et al. (2006). "Neurobehavioral assessment using a functional observational battery and motor activity in rats perinatally exposed to DE-71." *Neurotoxicology (Amsterdam)* 27(6): 1166.

- Moser, V. C. and J. R. Gee (2007). "Overview and evaluation of neurobehavioral effects of flame retardants in laboratory animals." *Neurotoxicology and Teratology* 29(3): 412.
- Moye, M. S., et al. (2015). "Effects of Total-Body Digital Photography on Cancer Worry in Patients With Atypical Mole Syndrome." *Jama Dermatology* 151(2): 137-143.
- Muhn, F., et al. (2013). "Novel mutations of the PRKAR1A gene in patients with acrodysostosis." *Clin Genet* 84(6): 531-538.
- Muir, T. A. (2005). "Is there a relationship between the rise in thyroid and neurodevelopmental health effects in North America and the rise in concentrations of PBDEs in the environment?" *IAGLR Conference Program and Abstracts* 48: 134-135.
- Muir, T. A. (2006). "Emerging chemicals and emerging science: Cumulative effects on thyroid and neurodevelopmental health." *IAGLR Conference Program and Abstracts* 49: 133-134.
- Muir, T. A. and M. Alaei (2003). "Costs and benefits of brominated flame retardants (BFRs) and alternatives." *IAGLR Conference Program and Abstracts* 46: 45-46.
- Mundy, W. R., et al. (2004). "Accumulation of PBDE-47 in primary cultures of rat neocortical cells." *Toxicol Sci* 82(1): 164-169.
- Murakami, R. and C. J. Campos (2012). "[Religion and mental health: the challenge of integrating religiosity to patient care]." *Rev Bras Enferm* 65(2): 361-367.
- Murdock, B. S. (2005). "Tracking toxins." *EMBO Reports* 6(8): 701-705.
- Murk, A. J., et al. (2013). "Mechanism-based testing strategy using in vitro approaches for identification of thyroid hormone disrupting chemicals." *Toxicology in Vitro* 27(4): 1320-1346.
- Murthy, A. S., et al. (1985). "Effect of 4,4'-oxydianiline on the thyroid and pituitary glands of F344 rats: a morphologic study with the use of the immunoperoxidase method." *J Natl Cancer Inst* 74(1): 203-208.
- Naert, C., et al. (2004). "Development of a gas chromatography/ion trap mass spectrometry based method for the quantification of polybrominated diphenyl ethers and polychlorinated biphenyls in adipose tissue." *Rapid Communications in Mass Spectrometry* 18(19): 2317-2322.
- Naert, C., et al. (2007). "Distribution of polychlorinated biphenyls and polybrominated diphenyl ethers in birds of prey from Switzerland." *Chemosphere* 68(5): 977-987.
- Nakajima, A., et al. (2009). "Neurobehavioral effects of tetrabromobisphenol A, a brominated flame retardant, in mice." *Toxicol Lett* 189(1): 78-83.

- Nakamura, A. (1991). "Triphenyl phosphate." *Environmental Health Criteria*(111): 1-80.
- Nakamura, N., et al. (2013). "Cell type-dependent agonist/antagonist activities of polybrominated diphenyl ethers." *Toxicol Lett* 223(2): 192-197.
- Napoli, E., et al. (2013). "Toxicity of the flame-retardant BDE-49 on brain mitochondria and neuronal progenitor striatal cells enhanced by a PTEN-deficient background." *Toxicol Sci* 132(1): 196-210.
- Narasimha, R., et al. (2008). "Evaluation of denoising algorithms for biological electron tomography." *J Struct Biol* 164(1): 7-17.
- Narayanan, S. and A. Franceschetti (2013). "Variations in treatment patterns and disease severity among patients with psoriasis receiving their first biologic in European union." *Value in Health* 16(7): A389.
- Neal, H. and A. Bond (1979). "Modification of PGO activity by specific uptake inhibitors fluoxetine, nisoxetine and LR5182." *Neuropharmacology* 18(10): 813-819.
- Needleman, H. L. (2008). "The case of Deborah Rice: who is the Environmental Protection Agency protecting?" *PLoS Biol.* 6(5): e129. [PLoS biology].
- Neff, N. H., et al. (1974). "The metabolism of indolealkylamines by type A and B monoamine oxidase of brain." *Adv Biochem Psychopharmacol* 11(0): 51-58.
- Nemeth, L., et al. (1998). "Cerebral ischemia reperfusion-induced vasogenic brain edema formation in rats: effect of an intracellular histamine receptor antagonist." *Eur J Pediatr Surg* 8(4): 216-219.
- Netto, I. (2010). "Using image analysis to investigate chemical stress-induced changes in the behaviour of *Daphnia magna*, *Euglena gracilis*, and *Hyalella azteca*." *Canadian Technical Report of Fisheries and Aquatic Sciences* 2883: 117.
- Nevison, C. D. (2014). "A comparison of temporal trends in United States autism prevalence to trends in suspected environmental factors." *Environ Health* 13: 73.
- Ni, H. G., et al. (2011). "Sampling and analytical framework for routine environmental monitoring of organic pollutants." *TrAC - Trends in Analytical Chemistry* 30(10): 1549-1559.
- Ni, J. X., et al. (2009). "Preparation and characterization of microencapsulated ammonium polyphosphate with polyurethane shell by in situ polymerization and its flame retardance in polyurethane." *Polymers for Advanced Technologies* 20(12): 999-1005.

Ni, S. Q., et al. (2013). "Application of Low-Cost Sponge Iron for Complete Debromination of Polybrominated Diphenyl Ethers." *Science of Advanced Materials* 5(8): 1123-1131.

Ni, Y. Y., et al. (2005). A study for measuring emissions of organophosphate flame retardants using a passive flux sampler. Beijing, Tsinghua University Press.

Nickerson, K. (2006). "Environmental contaminants in breast milk." *Journal of Midwifery and Women's Health* 51(1): 26-33.

Nicolle-Mir, L. (2011). "In vitro study of the neurotoxicity of polybrominated diphenyl ethers." *Environnement, Risques et Sante* 10(2): 88-89.

Nicolle-Mir, L. (2012). "Mechanisms of developmental neurotoxicity of polybrominated diphenyl ethers." *Environnement, Risques et Sante* 11(4): 275-277.

Nikandrov, V. N. (1974). "[Intensity of the transamination from aspartate to alpha-ketoglutarate in rat tissues under the influence of 2-methyl-4-chlorophenoxy-gamma-butyric acid]." *Ukr Biokhim Zh* 46(3): 364-367.

Nimitkitpaisan, Y. and P. Skolnick (1978). "Catecholamine receptors and cyclic AMP formation in the central nervous system: effects of tetrahydroisoquinoline derivatives." *Life Sci* 23(4): 375-382.

Nishiyama, T., et al. (2013). "Simultaneous measurement of cytosolic and mitochondrial Ca(2+) during ischemia in mice whole-brain slice preparation and its application to drug evaluation." *Acta neurochirurgica. Supplement* 118: 65-70.

Novikova, O. A., et al. (2000). "Feeding of endemic Baikal planarians of *Bdellocephala de man* genus." *IAGLR Conference Program and Abstracts* 43: A-119.

Noyes, P. D., et al. (2015). "Advanced morphological-behavioral test platform reveals neurodevelopmental defects in embryonic zebrafish exposed to comprehensive suite of halogenated and organophosphate flame retardants." *Toxicol Sci*.

Noyes, P. D., et al. (2011). Accumulation and debromination of decabromodiphenyl ether (BDE-209) in juvenile fathead minnows (*Pimephales promelas*) induces thyroid disruption and liver alterations. *Toxicol Sci*. 122: 265-274. [*Toxicological sciences* : an official journal of the Society of Toxicology].

Noyes, P. D., et al. (2013). "Low level exposure to the flame retardant BDE-209 reduces thyroid hormone levels and disrupts thyroid signaling in fathead minnows." *Environ Sci Technol* 47(17): 10012-10021.

- Nunes, J. R. S., et al. (2008). Prometheus - an integrated wildfire control system. Modelling, Monitoring and Management of Forest Fires. J. DeLasHeras, C. A. Brebbia, D. Viegas and V. Leone. Southampton, Wit Press. 119: 253-263.
- Nyirenda, M., et al. (2013). "Prevalence and correlates of depression among HIV-infected and -affected older people in rural South Africa." *J Affect Disord* 151(1): 31-38.
- Odebrecht Vargas Nunes, S., et al. (2014). Genetic polymorphisms in glutathione-S-transferases are associated with anxiety and mood disorders in nicotine dependence. *Psychiatr Genet*. 24: 87-93. [Psychiatric genetics].
- O'Donnell, R. T., et al. (2006). Learning hybrid Bayesian networks by MML. *AI 2006: Advances in Artificial Intelligence, Proceedings*. A. Sattar and B. H. Kang. Berlin, Springer-Verlag Berlin. 4304: 192-203.
- Oh, C. J., et al. (2013). "Production of micro-crystalline boehmite from hydrothermal processing of Bayer plant alumina tri-hydrate." *Powder Technology* 235: 556-562.
- Ohgoh, T., et al. (1977). "Studies on diphenyl ether derivatives. X. Pharmacological screening of dibenzo[b,g][1,5]thiazocine oxide derivatives (Japanese)." *Yakugaku Zasshi* 97(1): 31-35.
- Oktem, H., et al. (2003). "An adjustable aperiodic model class of genomic interactions using continuous time Boolean networks (Boolean delay equations)." *Chaos* 13(4): 1167-1174.
- Okuyama, S., et al. (1999). "Neuropharmacological profile of peripheral benzodiazepine receptor agonists, DAA1097 and DAA1106." *Life Sci* 64(16): 1455-1464.
- Olea Serrano, N., et al. (2008). "Drug and environmental safety: thyroid endocrine disruption." *Endocrinologia y Nutricion* 55(SUPPL. 1): 63-68.
- Onodera, J., et al. (2003). "Influence of PBDEs in an analytical method for PBDDs/PBDFs by high-resolution GC/MS." *Bunseki Kagaku* 52(3): 205-213.
- Onogbosele, C. O. and M. D. Scrimshaw (2014). "Hexabromocyclododecane and hexachlorocyclohexane: How lessons learnt have led to improved regulation." *Critical Reviews in Environmental Science and Technology* 44(13): 1423-1442.
- Onos, K. D., et al. (2007). "Long-term learning deficits following developmental exposure to the flame retardant decaBDE." *Neurotoxicology and Teratology* 29(5): 590.
- Onos, K. D., et al. (2009). "WITHDRAWN: Long-term Learning Deficits Following Developmental Exposure to the Flame Retardant decaBDE." *Neurotoxicol Teratol*.

- Oprea, S. (2012). "Synthesis and characterization of linear and crosslinked poly(urethane urea) elastomers with triazine moieties in the main chain." *Polymer Bulletin* 68(5): 1271-1285.
- Ortega Garcia, J. A., et al. (2005). "Environmental neurotoxins (III). Organochlorines, organobromines and bisphenol A: Adverse effects on the fetal and postnatal nervous systems." *Acta Paediatrica Espanola* 63(10): 429-436.
- Ostby, J. S., et al. (1985). "The postnatal effects of prenatal exposure to low doses of nitrofen (2,4-dichlorophenyl-p-nitrophenyl ether) in Sprague-Dawley rats." *Toxicology* 34(4): 285-297.
- Ostrach, D. J., et al. (2008). "Maternal transfer of xenobiotics and effects on larval striped bass in the San Francisco Estuary." *Proceedings of the National Academy of Sciences of the United States of America* 105(49): 19354-19359.
- Ozbal, C. C., et al. (2000). "Quantification of (7S,8R)-dihydroxy-(9R,10S)-epoxy-7,8,9,10-tetrahydrobenzo(a)pyrene adducts in human serum albumin by laser-induced fluorescence: Implications for the in vivo metabolism of benzo(a)pyrene." *Cancer Epidemiology Biomarkers and Prevention* 9(7): 733-739.
- Pacyniak, E., et al. (2011). Organic anion transporting polypeptides in the hepatic uptake of PBDE congeners in mice. *Toxicol Appl Pharmacol.* 257: 23-31. [Toxicology and applied pharmacology].
- Pae, C. U., et al. (2014). Aripiprazole augmentation for major depressive disorder: dosing patterns in a naturalistic treatment setting. *Int Clin Psychopharmacol.* 29: 116-119. [International clinical psychopharmacology].
- Pakpour, B., et al. (2010). "Inhibitory avoidance memory deficit induced by scopolamine: interaction with glutamatergic system in the nucleus accumbens." *Behav Pharmacol.* 21(8): 719-726. [Behavioural pharmacology].
- Pal, A., et al. (2014). "Emerging contaminants of public health significance as water quality indicator compounds in the urban water cycle." *Environment International* 71: 46-62.
- Paleologo, M., et al. (1992). "DETECTION OF BENZO-A-PYRENE-DIOL-EPOXIDE DNA ADDUCTS IN WHITE BLOOD CELLS OF PSORIATIC PATIENTS TREATED WITH COAL TAR." *Mutation Research* 281(1): 11-16.
- Palvarini, P. (2005). "The last generation of brief dynamic psychotherapy: The dynamic-experiential therapy." *Psicoterapia e Scienze Umane* 39(3): 323-346.
- Pampanin, D. M., et al. (2006). "An overview of the BEEP Stavanger workshop." *Aquat Toxicol* 78 Suppl 1: S124-126.

Pan, I. J., et al. (2009). "Lactational Exposure to Polychlorinated Biphenyls, Dichlorodiphenyltrichloroethane, and Dichlorodiphenyldichloroethylene and Infant Neurodevelopment: An Analysis of the Pregnancy, Infection, and Nutrition Babies Study." *Environmental Health Perspectives* 117(3): 488-494.

Pang, X. Y. and M. K. Song (2012). Preparation and anti-flame capability of Expandable Graphite. *Material Sciences and Technology, Pts 1 & 2*. Y. Li. Stafa-Zurich, Trans Tech Publications Ltd. 560-561: 779-783.

Pang, X. Y., et al. (2012). "PREPARATION OF HIGH DILATABILITY EXPANDABLE GRAPHITE AND ITS FLAME RETARDANCY FOR LLDPE." *Journal of the Chilean Chemical Society* 57(3): 1318-1322.

Pang, X. Y., et al. (2013). "Preparation of low initial expansion temperature expandable graphite and its flame retardancy for LLDPE." *Central European Journal of Chemistry* 11(6): 953-959.

Pang, X. Y., et al. (2014). "Preparation of Expandable Graphite Intercalated by Sulfuric Acid and Sodium Silicate and Its Flame Retardancy Application for Ethylene Vinyl Acetate Copolymer." *Asian Journal of Chemistry* 26(14): 4297-4302.

Papa, E., et al. (2010). "QSAR Modeling and Prediction of the Endocrine-Disrupting Potencies of Brominated Flame Retardants." *Chemical Research in Toxicology* 23(5): 946-954.

Papa, E., et al. (2014). "Metabolic biotransformation half-lives in fish: QSAR modeling and consensus analysis." *Science of the Total Environment* 470-471: 1040-1046.

Papaspyrides, C. D., et al. (2009). "Development of advanced textile materials: natural fibre composites, anti-microbial, and flame-retardant fabrics." *Proceedings of the Institution of Mechanical Engineers Part L-Journal of Materials-Design and Applications* 223(L2): 91-U92.

Parent, R. A., et al. (1979). "Behavioral toxicity in Fischer rats exposed to smoke from non-flaming combustion of ten flexible polyurethane foams." *Journal of Combustion Toxicology* 6(NOV.): 215-227.

Park, H. R., et al. (2014). Involvement of reactive oxygen species in brominated diphenyl ether-47-induced inflammatory cytokine release from human extravillous trophoblasts in vitro. *Toxicol Appl Pharmacol.* 274: 283-292. [Toxicology and applied pharmacology].

Park, J. S., et al. (2011). "High postnatal exposures to polybrominated diphenyl ethers (PBDEs) and polychlorinated biphenyls (PCBs) via breast milk in California: does BDE-209 transfer to breast milk?" *Environ Sci Technol* 45(10): 4579-4585.



Park, J. W. and K. H. Park (2014). "Validation of the bipolar disorder etiology scale based on psychological behaviorism theory and factors related to the onset of bipolar disorder." *PLoS One* 9(12): e116265.

Pastorelli, R., et al. (2001). "Benzo(a)pyrene diolepoxide adducts to albumin in workers exposed to polycyclic aromatic hydrocarbons: Association with specific CYP1A1, GSTM1, GSTP1 and EHPX genotypes." *Biomarkers* 6(5): 357-374.

Patey-Pirra, S., et al. (2014). "[Benefits and risks of iodine supplementation during pregnancy: a review of observational and experimental studies in mild-to-moderate iodine deficiency areas]." *Rev Epidemiol Sante Publique*. 62(1): 65-74. [Revue d'epidemiologie et de sante publique].

Patrick, L. (2009). "Thyroid disruption: mechanism and clinical implications in human health." *Altern Med Rev* 14(4): 326-346.

Patrick, L. (2009). "Thyroid disruption: Mechanisms and clinical implications in human health." *Alternative Medicine Review* 14(4): 326-346.

Paul, D. H. (1982). THE CEREBELLUM OF FISHES A COMPARATIVE NEUROPHYSIOLOGICAL AND NEURO ANATOMICAL REVIEW. Lowenstein, O.: P111-178.

Pavanello, S., et al. (2004). "GSTM1 null genotype as a risk factor for anti-BPDE-DNA adduct formation in mononuclear white blood cells of coke-oven workers." *Mutation Research* 558(1-2): 53-62.

Pavelka, K., et al. (1973). "Double-blind comparison of alclofenac and phenylbutazone in the short-term treatment of rheumatoid arthritis." *Current medical research and opinion* 1(6): 342-350.

Pavlassek, J. and E. Dekan (1986). "A simple method for microinjections into the brain of conscious laboratory rats." *Ceskoslovensk? fyziologie / ?stredn? ?stav biologick?* 35(5): 429-431.

Pearce, E. N. and L. E. Braverman (2009). "Environmental pollutants and the thyroid." *Best Pract Res Clin Endocrinol Metab* 23(6): 801-813.

Pedersen, J. A., et al. (2005). Human pharmaceuticals, hormones, and personal care product ingredients in runoff from agricultural fields irrigated with treated wastewater. *J Agric Food Chem*. 53: 1625-1632. [Journal of agricultural and food chemistry].

Pedersen, J. A., et al. (2003). Xenobiotic organic compounds in runoff from fields irrigated with treated wastewater. *J Agric Food Chem*. 51: 1360-1372. [Journal of agricultural and food chemistry].

- Peeters, E. T. H. M., et al. (2009). "Behavioral Ecotoxicology: Mechanisms, Effects, Applications, and Biomonitoring." *Human and Ecological Risk Assessment* 15(1): 7-10.
- Pejler, B. and B. Berzins (1993). "On choice of substrate and habitat in bdelloid rotifers." *Hydrobiologia* 255-256(0): 333-338.
- Pellacani, C., et al. (2012). "Evaluation of DNA damage induced by 2 polybrominated diphenyl ether flame retardants (BDE-47 and BDE-209) in SK-N-MC cells." *Int J Toxicol* 31(4): 372-379.
- Pellacani, C., et al. (2014). "Synergistic interactions between PBDEs and PCBs in human neuroblastoma cells." *Environ Toxicol* 29(4): 418-427.
- Pennings, S. C. and V. J. Paul (1993). "Sequestration of dietary secondary metabolites by three species of sea hares: Location, specificity and dynamics." *Marine Biology (Berlin)* 117(4): 535-546.
- Pereda, A., et al. (2013). "Brachydactyly E: isolated or as a feature of a syndrome." *Orphanet J Rare Dis* 8: 141.
- Perera, F. P., et al. (1988). "Detection of polycyclic aromatic hydrocarbon-dna adducts in white blood cells of foundry workers." *Cancer Res* 48(8): 2288-2291.
- Perlman, J. M. (1998). "White matter injury in the preterm infant: an important determination of abnormal neurodevelopment outcome." *Early Human Development* 53(2): 99-120.
- Peroutka, S. J., et al. (1977). "Neuroleptic drug interactions with norepinephrine alpha receptor binding sites in rat brain." *Neuropharmacology* 16(9): 549-556.
- Pessah, I. N. (2009). "NON-COPLANAR ENVIRONMENTAL CHEMICALS: IMPLICATIONS FOR AUTISM RISK." *Journal of Neurochemistry* 108(Suppl. 1): 32-33.
- Pessah, I. N., et al. (2010). "Minding the calcium store: Ryanodine receptor activation as a convergent mechanism of PCB toxicity." *Pharmacology & Therapeutics* 125(2): 260-285.
- Pessah, I. N., et al. (2008). "Immunologic and neurodevelopmental susceptibilities of autism." *NeuroToxicology* 29(3): 531-544.
- Petreas, M. and D. Oros (2009). "Polybrominated diphenyl ethers in California wastestreams." *Chemosphere* 74(7): 996-1001.

Petreas, M., et al. (2004). "Distribution of persistent, lipid-soluble chemicals in breast and abdominal adipose tissues: Lessons learned from a breast cancer study." *Cancer Epidemiology Biomarkers & Prevention* 13(3): 416-424.

Petruzzelli, S., et al. (1998). "Serum antibodies to benzo(alpha)pyrene diol epoxide-DNA adducts in the general population: Effects of air pollution, tobacco smoking, and family history of lung diseases." *Cancer Research* 58(18): 4122-4126.

Phillips, D. H. (2012). "Chemically-induced DNA damage and its consequences for elucidating causes and mechanisms of cancer." *Mutagenesis* 27(1): 103.

Pianalto, M., et al. (2013). "Endocrine disruptors and thyroid function - a relationship? A systematic review about thyroid effects of endocrine disruptors." 5th European Conference on Public Health (Malta 2012): 35-39.

Picada, J. N., et al. (2011). Neurobehavioral and genotoxic parameters of antipsychotic agent aripiprazole in mice. *Acta Pharmacol Sin.* 32: 1225-1232. [*Acta pharmacologica Sinica*].

Picard, M., et al. (2014). "Chemotherapy hypersensitivity reactions in ovarian cancer." *J Natl Compr Canc Netw.* 12(3): 389-402. [*Journal of the National Comprehensive Cancer Network : JNCCN*].

Piedrafita, B., et al. (2008). "Developmental exposure to polychlorinated biphenyls PCB153 or PCB126 impairs learning ability in young but not in adult rats." *European Journal of Neuroscience* 27(1): 177-182.

Pignatello, J. J., et al. (2010). "Sources, interactions, and ecological impacts of organic contaminants in water, soil, and sediment: An introduction to the special series." *Journal of Environmental Quality* 39(4): 1133-1138.

Pilatti, A., et al. (2014). The Spanish version of the Brief Young Adult Alcohol Consequences Questionnaire (B-YAACQ): a Rasch model analysis. *Addict Behav.* 39: 842-847. [*Addictive behaviors*].

Piliguian, M., et al. (2014). Novel CYP2A6 variants identified in African Americans are associated with slow nicotine metabolism in vitro and in vivo. *Pharmacogenet Genomics.* 24: 118-128. [*Pharmacogenetics and genomics*].

Pineiro, S. A., et al. (2003). "Relationships among halophilic *Bdellovibrio* and like-organisms (HBALOs) based upon 16S rRNA sequences and specific primer." *Abstracts of the General Meeting of the American Society for Microbiology* 103: N-259.

Pizzurro, D. M., et al. (2014). "Astrocytes protect against diazinon- and diazoxon-induced inhibition of neurite outgrowth by regulating neuronal glutathione." *Toxicology* 318: 59-68.

- Poelsler, L., et al. (2013). "Heterozygous partial HDAC4 deletion in a family with brachydactyly type E and short stature but normal intelligence." *Medizinische Genetik* 25(1): 133.
- Pohlein, M., et al. (2008). "Versatile and fast gas chromatographic determination of frequently used brominated flame retardants in styrenic polymers." *J Chromatogr A* 1203(2): 217-228.
- Ponnampalam, L. S. (2014). "Medics and marine mammals - An unlikely but important connection for humanity's survival." *Malaysian Journal of Medical Sciences* 21(2): 1-3.
- Ponten, E., et al. (2011). "Neonatal exposure to propofol affects BDNF but not CaMKII, GAP-43, synaptophysin and tau in the neonatal brain and causes an altered behavioural response to diazepam in the adult mouse brain." *Behavioural Brain Research* 223(1): 75-80.
- Poon, E., et al. (2011). "Effects of developmental exposure to polychlorinated biphenyls and/or polybrominated diphenyl ethers on cochlear function." *Toxicol Sci* 124(1): 161-168.
- Poon, S. and G. Koren (2013). "Neurodevelopment of children assessed after prenatal exposure to polybrominated diethyl ethers from collapse of world trade center." *Ther Drug Monit* 35(5): 560-561.
- Popelka, M. M., et al. (2000). "Moderate alcohol consumption and hearing loss: A protective effect." *Journal of the American Geriatrics Society* 48(10): 1273-1278.
- Potts, L. F., et al. (2015). "A new quantitative rating scale for dyskinesia in nonhuman primates." *Behav Pharmacol.* 26(1-2): 109-116. [Behavioural pharmacology].
- Powers, C. M., et al. (2014). "Sparkling Connections: Toward better linkages between research and human health policy-an example with multiwalled carbon nanotubes." *Toxicological Sciences* 141(1): 6-17.
- Pradhan, A., et al. (2013). "The brominated flame retardant TBECHE activates the zebrafish (*Danio rerio*) androgen receptor, alters gene transcription and causes developmental disturbances." *Aquatic Toxicology* 142-143: 63-72.
- Prasada Rao, S. K., et al. (2011). Chapter 40 - Brominated flame retardants. *Reproductive and Developmental Toxicology*. R. C. Gupta. San Diego, Academic Press: 523-541.
- Pratt-Szeliga, P. C., et al. (2012). "Xanthosine after five years expands to become Openmods." *Nucleic Acids Res* 40(Database issue): D1288-1294.

Preau, L., et al. (2015). "Thyroid hormone signaling during early neurogenesis and its significance as a vulnerable window for endocrine disruption." *Biochimica Et Biophysica Acta-Gene Regulatory Mechanisms* 1849(2): 112-121.

Preisman, R. C., et al. (1981). "Memory performance of chemical workers exposed to polybrominated biphenyls au - brown gg." *Science* 212: 1413-1415.

Prior, H., et al. (1997). "Dissociation of spatial reference memory, spatial working memory, and hippocampal mossy fiber distribution in two rat strains differing in emotionality." *Behav Brain Res* 87(2): 183-194.

Pruett, S. B. (1990). Mechanisms of immunotoxicity of organophosphates. RePORTER Database National Institutes of Health.

Pulera, N., et al. (1997). "Presence and persistence of serum anti-benzo(a)pyrene diolepoxide-DNA adduct antibodies in smokers: Effects of smoking reduction and cessation." *International Journal of Cancer* 70(2): 145-149.

Purser, D. A. (1992). "Combustion Toxicology of Anticholinesterases." *Clinical and Experimental Toxicology of Organophosphates and Carbamates*, B. Ballantyne and T. C. Marrs, Editors.

Qi, L., et al. (2010). "A comparison of multiple imputation and fully augmented weighted estimators for Cox regression with missing covariates." *Stat Med* 29(25): 2592-2604.

Qi, S. N., et al. (2013). The Degradation of Decabromodiphenyl Ether in the Supercritical fluid. *Advances in Applied Science and Industrial Technology*, Pts 1 and 2. P. Xu, Y. Wang, Y. Su and L. Hao. Stafa-Zurich, Trans Tech Publications Ltd. 798-799: 134-137.

Qian, B., et al. (2014). "The Role of Thyroid Hormone Deiodinase in Developmental Neurotoxicity in Newborn Mice Mediated by Decabromodiphenyl Ether (BDE 209) Exposure during Pregnancy and Lactation." *Asian Journal of Ecotoxicology* 9(3): 459-466.

Qin, Z., et al. (2010). "Controllable synthesis of well-dispersed and uniform-sized single crystalline zinc hydroxystannate nanocubes." *Crystengcomm* 12(12): 4156-4160.

Qiu, X., et al. (2007). "Measurement of polybrominated diphenyl ethers and metabolites in mouse plasma after exposure to a commercial pentabromodiphenyl ether mixture." *Environmental Health Perspectives* 115(7): 1052-1058.

Qiu, Y., et al. (2014). Behavioral effects of the imidazoline I(2) receptor ligand BU99006 in rats. *Behav Pharmacol.* 25: 130-136. [Behavioural pharmacology].

Qu, G., et al. (2011). "Identification of tetrabromobisphenol A diallyl ether as an emerging neurotoxicant in environmental samples by bioassay-directed fractionation and HPLC-APCI-MS/MS." *Environ Sci Technol* 45(11): 5009-5016.

Qu, G. B., et al. (2011). "Detection of tris-(2,3-dibromopropyl) isocyanurate as a neuronal toxicant in environmental samples using neuronal toxicity-directed analysis." *Science China-Chemistry* 54(10): 1651-1658.

Qu, X., et al. (2013). "A big data approach to the ultra-fast prediction of DFT-calculated bond energies." *J Cheminform* 5: 34.

Quinete, N., et al. (2014). "Occurrence and distribution of PCB metabolites in blood and their potential health effects in humans: a review." *Environmental Science and Pollution Research* 21(20): 11951-11972.

Quiroz, R., et al. (2008). "Analysis of polybrominated diphenyl ethers in atmospheric deposition and snow samples by solid-phase disk extraction." *J Chromatogr A* 1192(1): 147-151.

Quock, R. M. and G. A. Beal (1976). "Fenfluramine-induced hyperthermia and stimulation in the rabbit." *Res Commun Chem Pathol Pharmacol* 13(3): 401-409.

Raldua, D., et al. (2008). "First evidence of polybrominated diphenyl ether (flame retardants) effects in feral barbel from the Ebro River basin (NE, Spain)." *Chemosphere* 73(1): 56-64.

Ramsdell, J. (2009). "Role of domoic acid and DDT in an emerging epilepsy disorder of California sea lions." *Neurotoxicology and Teratology* 31(4): 239.

Randall, K., et al. (2011). "Evaluation of surfactants as solubilizing agents in microsomal metabolism reactions with lipophilic substrates." *In Vitro Cellular & Developmental Biology-Animal* 47(9): 631-639.

Rasinger, J. D., et al. (2014). "Cross-omics gene and protein expression profiling in juvenile female mice highlights disruption of calcium and zinc signalling in the brain following dietary exposure to CB-153, BDE-47, HBCD or TCDD." *Toxicology* 321(1): 1-12.

Rattley, M. (2012). "Ambiguous bromine." *Nature Chemistry* 4(6): 512.

Rauk, A., et al. (2000). "Is oxidative damage by (beta)-amyloid and prion peptides mediated by hydrogen atom transfer from glycine (alpha)-carbon to methionine sulfur within (beta)-sheets?" *Journal of the American Chemical Society* 122(40): 9761-9767.

Ravnum, S., et al. (2012). "Policy relevant results from an expert elicitation on the human health risks of decabromodiphenyl ether (decaBDE) and hexabromocyclododecane (HBCD)." *Environmental Health: A Global Access Science Source* 11(SUPPL.1).

Ray, J. C. and M. E. Sunquist (2001). "Trophic relations in a community of African rainforest carnivores." *Oecologia (Berlin)* 127(3): 395-408.

Raychoudhury, T. and T. Scheytt (2013). "Potential of zerovalent iron nanoparticles for remediation of environmental organic contaminants in water: a review." *Water Science and Technology* 68(7): 1425-1439.

Raymond, L. and A. Olive (2009). "Ideas, Discourse, and Rhetoric in Political Choice." *Polity* 41(2): 189-210.

Rayne, S. and K. Forest (2010). "Quantitative structure-activity relationship (QSAR) studies for predicting activation of the ryanodine receptor type 1 channel complex (RyR1) by polychlorinated biphenyl (PCB) congeners." *Journal of Environmental Science and Health Part a-Toxic/Hazardous Substances & Environmental Engineering* 45(3): 355-362.

Reinhard, J. F., Jr. and R. J. Wurtman (1977). "Relation between brain 5-HIAA levels and the release of serotonin into brain synapses." *Life Sci* 21(12): 1741-1746.

Reistad, T., et al. (2006). "Neurotoxicity of the pentabrominated diphenyl ether mixture, DE-71, and hexabromocyclododecane (HBCD) in rat cerebellar granule cells in vitro." *Arch Toxicol* 80(11): 785-796.

Reistad, T., et al. (2013). "Perfluoroalkylated compounds induce cell death and formation of reactive oxygen species in cultured cerebellar granule cells." *Toxicol Lett* 218(1): 56-60.

Reistad, T., et al. (2007). "In vitro toxicity of tetrabromobisphenol-A on cerebellar granule cells: cell death, free radical formation, calcium influx and extracellular glutamate." *Toxicol Sci* 96(2): 268-278.

Ren, G. F., et al. (2011). "Determination of polybrominated diphenyl ethers and their methoxylated and hydroxylated metabolites in human serum from electronic waste dismantling workers." *Analytical Methods* 3(2): 408-413.

Ren, X.-M. and L.-H. Guo (2013). "Molecular toxicology of polybrominated diphenyl ethers: nuclear hormone receptor mediated pathways." *Environmental Science-Processes & Impacts* 15(4): 702-708.

Ren, Y. L., et al. (2013). "Preparation, Characterization and Property of FR-PVA-g-AN." *Chemical Journal of Chinese Universities-Chinese* 34(5): 1264-1269.

- Ren, Z., et al. (2009). "Behavioral responses of *Daphnia magna* to stresses of chemicals with different toxic characteristics." *Bull Environ Contam Toxicol* 82(3): 310-316.
- Renner, R. (2001). "Firesafe but not failsafe. Flame retardants cause neurotoxic effects." *Environ Health Perspect* 109(9): A434-435.
- Reverte, I., et al. (2014). "Neurodevelopmental effects of decabromodiphenyl ether (BDE-209) in APOE transgenic mice." *Neurotoxicol Teratol* 46: 10-17.
- Reverte, I., et al. (2013). "Long term effects of murine postnatal exposure to decabromodiphenyl ether (BDE-209) on learning and memory are dependent upon APOE polymorphism and age." *Neurotoxicol Teratol* 40: 17-27.
- Reverte, I., et al. (2014). "Thyroid hormones and fear learning but not anxiety are affected in adult apoE transgenic mice exposed postnatally to decabromodiphenyl ether (BDE-209)." *Physiol Behav* 133: 81-91.
- Reverte, I., et al. (2010). "Differential effects of early exposition to deca-bromo diphenil ether in ApoE4, ApoE3 and ApoE2 young mice." *Toxicology Letters* 196: S221.
- Ribas-Fito, N., et al. (2006). "Child health and the environment: The INMA Spanish study." *Paediatric and Perinatal Epidemiology* 20(5): 403-410.
- Ricci, C. (1993). "A case of "facultative" viviparous reproduction in Rotifera Bdelloidea." *Istituto Lombardo Accademia di Scienze e Lettere Rendiconti Scienze Chimiche e Fisiche Geologiche Biologiche e Mediche B* 127(2): 259-263.
- Ricci, C. and M. Caprioli (2004). "Dormancy of bdelloid rotifers: Costs and limits." *Integrative and Comparative Biology* 44(6): 740,739.
- Ricci, C., et al. (2007). "Stress and fitness in parthenogens: is dormancy a key feature for bdelloid rotifers?" *BMC Evolutionary Biology* 7(Suppl. 2): S9.
- Ricciardi, F., et al. (2010). "Biomarker responses and contamination levels in crabs (*Carcinus aestuarii*) from the Lagoon of Venice: An integrated approach in biomonitoring estuarine environments." *Water Res* 44(6): 1725-1736.
- Rice, D. C. (2007). "Risk assessment and regulation of PBDEs." *Neurotoxicol Teratol* 29(3): 413-414.
- Rice, D. C., et al. (2007). "Developmental delays and locomotor activity in the C57BL6/J mouse following neonatal exposure to the fully-brominated PBDE, decabromodiphenyl ether." *Neurotoxicol Teratol* 29(4): 511-520.



Rice, D. C., et al. (2009). "Behavioral changes in aging but not young mice after neonatal exposure to the polybrominated flame retardant decaBDE." *Environ Health Perspect* 117(12): 1903-1911.

Richardson, S. D. (1959). "Operation Firestop." *Empire Forest Rev* 38((1)): 26-34.

Rico-Martinez, R., et al. (1996). "Surface glycoproteins potentially involved in mate recognition in nine freshwater rotifer species." *Archiv fuer Hydrobiologie* 138(1): 1-10.

Rider, C. V., et al. (2013). "Mixtures research at NIEHS: An evolving program." *Toxicology* 314(2-3): 94-102.

Ritz, B., et al. (2005). "Can lessons from public health disease surveillance be applied to environmental public health tracking?" *Environmental Health Perspectives* 113(3): 243-249.

Roberts, J. M. K., et al. (2011). "Does *Bdellodes lapidaria* (Acari: Bdellidae) have a role in biological control of the springtail pest, *Sminthurus viridis* (Collembola: Sminthuridae) in south-eastern Australia?" *Biological Control* 58(3): 222-229.

Roberts, J. W., et al. (2009). "Monitoring and reducing exposure of infants to pollutants in house dust." *Rev Environ Contam Toxicol* 201: 1-39.

Robles-Molina, J., et al. (2014). "Multi-residue method for the determination of over 400 priority and emerging pollutants in water and wastewater by solid-phase extraction and liquid chromatography-time-of-flight mass spectrometry." *Journal of Chromatography A* 1350: 30-43.

Rochester, J. R., et al. (2013). "Prenatal origins of diseases/disorders and syndromes (PODS): Making the science accessible." *Endocrine Reviews* 34(3).

Roeder, R. A. and C. I. Schulman (2010). "An overview of war-related thermal injuries." *J Craniofac Surg* 21(4): 971-975.

Roosens, L., et al. (2010). "Spatial variations in the levels and isomeric patterns of PBDEs and HBCDs in the European eel in Flanders." *Environment International* 36(5): 415-423.

Rose, M., et al. (2010). PBDEs in 2-5 year-old children from California and associations with diet and indoor environment. *Environ Sci Technol.* 44: 2648-2653. [Environmental science & technology].

Rosen, L. D. and D. Imus (2007). "Environmental Injustice: Children's Health Disparities and the Role of the Environment." *Explore: The Journal of Science and Healing* 3(5): 524-528.

Rosenberg, M. L., et al. (1990). "Childhood injuries: Where we are." *Pediatrics* 86(6 SUPPL.): 1084-1091.

Rosenberger, W., et al. (2014). "Determination of organic compounds in cabin air after aircraft de-icing of commercial aircraft." *Gefahrstoffe Reinhaltung Der Luft* 74(11-12): 467-475.

Rosenkranz, H. S. and G. Klopman (1990). "Structural alerts to genotoxicity: the interaction of human and artificial intelligence." *Mutagenesis* 5: 333-361.

Rosenkranz, H. S. and G. Klopman (1990). "The structural basis of the mutagenicity of chemicals in *Salmonella typhimurium*: The National Toxicology Program data base." *Mutat Res* 228(1): 51-80.

Roth, B. (1981). "Sleep and consciousness disorders--a new medical specialty." *Casopis lékařů českých* 120(37): 1123-1124.

Roth, N. and M. F. Wilks (2014). "Neurodevelopmental and neurobehavioural effects of polybrominated and perfluorinated chemicals: a systematic review of the epidemiological literature using a quality assessment scheme." *Toxicol Lett* 230(2): 271-281.

Ruan, X. C., et al. (2013). "Photodegradation of Tri (2-chloroethyl) Phosphate in Aqueous Solution by UV/H<sub>2</sub>O<sub>2</sub>." *Water Air and Soil Pollution* 224(1): 10.

Ruan, X. C., et al. (2014). "Photodegradation of Tri(Chloropropyl) Phosphate Solution by UV/O<sub>3</sub>." *Water Air and Soil Pollution* 225(8): 9.

Sable, H. J. (2008). Assessment of Psychostimulant Addiction Risk Following Developmental PCB Exposure. RePORTER Database National Institutes of Health.

Sacchi, L. (2004). "Ultrastructural basis of interactions between prokaryotes and eukaryotes in different symbiotic models." *Parassitologia (Rome)* 46(1-2): 19-24.

Sachana, M., et al. (2011). *In vitro* biomarkers of developmental neurotoxicity, Elsevier Academic Press Inc, 525 B Street, Suite 1900, San Diego, Ca 92101-4495 USA.

Sadek, B., et al. (2014). Anticonvulsive effect of nonimidazole histamine H<sub>3</sub> receptor antagonists. *Behav Pharmacol.* 25: 245-252. [Behavioural pharmacology].

Saegusa, Y., et al. (2009). "Developmental toxicity of brominated flame retardants, tetrabromobisphenol A and 1,2,5,6,9,10-hexabromocyclododecane, in rat offspring after maternal exposure from mid-gestation through lactation." *Reproductive Toxicology* 28(4): 456-467.

Saegusa, Y., et al. (2012). "Transient aberration of neuronal development in the hippocampal dentate gyrus after developmental exposure to brominated flame retardants in rats." *Arch Toxicol* 86(9): 1431-1442.

Saegusa, Y., et al. (2010). "Sustained production of Reelin-expressing interneurons in the hippocampal dentate hilus after developmental hypothyroidism in rats." *Toxicology Letters* 196: S227-S228.

Saito, I., et al. (2007). "Indoor organophosphate and polybrominated flame retardants in Tokyo." *Indoor Air* 17(1): 28-36.

Salomon, M. (2005). "Brominated flame retardants - Status quo in risk discussion." *Umweltmedizin in Forschung und Praxis* 10(3): 183-197.

Sanchez-Hernandez, J. C. (2006). "Earthworm biomarkers in ecological risk assessment." *Rev Environ Contam Toxicol* 188: 85-126.

Sand, S., et al. (2004). "Dose-response modeling and benchmark calculations from spontaneous behavior data on mice neonatally exposed to 2, 2', 4, 4', 5-pentabromodiphenyl ether." *Toxicology and Applied Pharmacology* 197(3): 360.

Sand, S., et al. (2005). "Dose-Response Modeling And Benchmark Calculations From Spontaneous Behavior Data On Mice Neonatally Exposed To 2, 2', 4, 4', 5 - Pentabromodiphenyl Ether." *Toxicol Sci* 84(1-S): 82.

Sand, S., et al. (2004). "Dose-response modeling and benchmark calculations from spontaneous behavior data on mice neonatally exposed to 2,2',4,4',5-pentabromodiphenyl ether (vol 81, pg 160, 2004)." *Toxicological Sciences* 82(2): 661-661.

Sand, S., et al. (2004). "Dose-response modeling and benchmark calculations from spontaneous behavior data on mice neonatally exposed to 2,2',4,4',5-pentabromodiphenyl ether." *Toxicol Sci* 81(2): 491-501.

Sand, S., et al. (2004). "Erratum: "Dose-response modeling and benchmark calculations from spontaneous behavior data on mice neonatally exposed to 2, 2',4,4',5-Pentabromodiphenyl Ether" (*Toxicological Sciences* vol. 81 (491-501))." *Toxicological Sciences* 82(2): xxx.

Sanders, B., et al. (1977). "Effects of three monoamine oxidase inhibitors on ethanol preference in mice." *Pharmacol Biochem Behav* 6(3): 319-324.

Sanderson, J. T. (2006). "The steroid hormone biosynthesis pathway as a target for endocrine-disrupting chemicals." *Toxicological Sciences* 94(1): 3-21.

- Sandfort, T. G. and M. de Keizer (2001). "Sexual problems in gay men: an overview of empirical research." *Annu Rev Sex Res* 12: 93-120.
- Saniova, B., et al. (1998). "Memory, awareness and learning in general anesthesia." *Bratislavsk? lek?rske listy* 99(10): 518-524.
- Sarfraz Iqbal, M., et al. (2013). "Understanding quantitative structure-property relationships uncertainty in environmental fate modeling." *Environ Toxicol Chem* 32(5): 1069-1076.
- Sasa, M. and M. Wakasugi (1957). "Studies on the effect of carbon dioxide as the stimulant on the tropical rat mite, *Bdellonyssus bacoti* (Hirst, 1913)." *Japanese Jour Exptl Med* 27((4)): 207-215.
- Sastry, B. S. and J. W. Phillis (1977). "Inhibition of cerebral cortical neurones by a 5-hydroxytryptaminergic pathway from median raphe nucleus." *Can J Physiol Pharmacol* 55(3): 737-743.
- Sato, K., et al. (1985). "Scanning electron microscopic and light microscopic observation of the development of myeloschisis in rat fetuses induced by ethylenethiourea." 1984 Annual Meeting of the Research Team on Mental Retardation and Brain Damage, Todofuken Kaikan, Japan, Feb. 1-2, 1985. *Brain Dev* 7(5): 1986.
- Sato, M. and Y. Fujiwara (1986). "Behavioral and neurochemical changes in pups prenatally exposed to methamphetamine." *Brain Dev* 8: 390-396.
- Schantz, S. L. (2008). PCBs, PBDEs, Hearing Loss & Attention/Impulsivity: Mechanistic Studies in Animals. RePORTER Database National Institutes of Health.
- Schantz, S. L. (2009). PCBs, PBDEs, Hearing Loss & Attention/Impulsivity: Mechanistic Studies in Animals. RePORTER Database National Institutes of Health.
- Schantz, S. L. (2010). PCBs, PBDEs, Hearing Loss & Attention/Impulsivity: Mechanistic Studies in Animals. RePORTER Database National Institutes of Health.
- Schechter, A., et al. (2005). "Polybrominated diphenyl ether flame retardants in the U.S. population: Current levels, temporal trends, and comparison with dioxins, dibenzofurans, and polychlorinated biphenyls." *Journal of Occupational and Environmental Medicine* 47(3): 199-211.
- Schechter, A., et al. (2012). "Hexabromocyclododecane (HBCD) stereoisomers in U.S. food from Dallas, Texas." *Environ Health Perspect* 120(9): 1260-1264.
- Schmid, C. and J. S. Rotenberg (2005). "Neurodevelopmental toxicology." *Neurologic Clinics* 23(2): 321-336.

Schmid-Araya, J. M. (1995). "New records of rare Bdelloidea and Monogononta rotifers in gravel streams." *Archiv fuer Hydrobiologie* 135(1): 129-143.

Schmidt, C. W. (2000). "A contaminant in mother's milk: Persistent threat of PBDES." *Environmental Health Perspectives* 108(5): A225.

Schmidt, C. W. (2006). "Proteomic insights into brain development: Neurotoxic effects of PBDE-99 in mice." *Environmental Health Perspectives* 114(2): A113-A114.

Schmidt, M. J. and J. F. Thornberry (1977). "Norepinephrine-stimulated cyclic AMP accumulation in brain slices in vitro after serotonin depletion or chronic administration of selective amine reuptake inhibitors." *Arch Int Pharmacodyn Ther* 229(1): 42-51.

Schmitt, M., et al. (1990). "REDUCED BENZO-A-PYRENE ACTIVATION POTENTIAL IN LYMPHOCYTES FROM CHRONIC ALCOHOLICS." *Alcohol* 7(2): 137-144.

Schmitt, U. and B. A. Sabel (1996). "MK-801 reduces retinal ganglion cell survival but improves visual performance after controlled optic nerve crush." *Journal of Neurotrauma* 13(12): 791-800.

Schram, M. D., et al. (1990). "DIEL AND SEASONAL DRIFT OF ZOOPLANKTON IN A HEADWATER STREAM." *American Midland Naturalist* 123(1): 135-143.

Schreiber, T., et al. (2010). "Polybrominated diphenyl ethers induce developmental neurotoxicity in a human in vitro model: evidence for endocrine disruption." *Environ Health Perspect* 118(4): 572-578.

Schreiber, T., et al. (2010). "Polybrominated diphenyl ethers disturb neural development of mice and men in vitro." *Naunyn-Schmiedeberg's Archives of Pharmacology* 381: 64.

Schreiber, T., et al. (2009). "Polybrominated diphenyl ethers disturb human neural development in vitro." *Toxicology Letters* 189: S78.

Schug, T. T., et al. (2011). "Endocrine disrupting chemicals and disease susceptibility." *Journal of Steroid Biochemistry and Molecular Biology* 127(3-5): 204-215.

Schulte, O., et al. (2009). *A New Hybrid Method for Bayesian Network Learning With Dependency Constraints*. New York, Ieee.

Schultz, I., et al. (2008). "Effect of parental exposure to trenbolone and the brominated flame retardant BDE-47 on fertility in rainbow trout (*Oncorhynchus mykiss*)." *Marine Environmental Research* 66(1): 47-49.

Schulz, S. C., et al. (2013). "An exploratory study of the relationship of symptom domains and diagnostic severity to PET scan imaging in borderline personality disorder." *Psychiatry Research Neuroimaging* 214(2): 161-168.

Schutz, M. R., et al. (2011). "Complexing agent assisted synthesis of high aspect ratio Fe<sub>3</sub>/Mg<sub>2</sub> layered double hydroxides." *Applied Clay Science* 54(3-4): 281-286.

Schwartz, B. S., et al. (1990). "Solvent-associated decrements in olfactory function in paint manufacturing workers." *Am J Ind Med* 18(6): 697-706.

Schwartz, J. J., et al. (2013). "Using mouse models of autism spectrum disorders to study the neurotoxicology of gene-environment interactions." *Neurotoxicology and Teratology* 36: 17-35.

Schwarzman, M. (2008). "Potential toxicity of synthetic chemicals: What you should know about endocrine-disrupting chemicals." *American Family Physician* 78(5): 565-568.

Sclafani, A. and C. Perez (1997). "Cypha [propionic acid, 2-(4-methoxyphenol) salt] inhibits sweet taste in humans, but not in rats." *Physiol Behav* 61(1): 25-29.

Seegal, R. F. (2006). "An overview: Developmental neuroendocrine effects of PCBs and PBDEs: Parallels with ADHD." *Neurotoxicology (Amsterdam)* 27(6): 1160.

Seegal, R. F. (2008). Developmental Neuroendocrine Effects of PCBs and PBDEs: Parallels with ADHD. RePORTER Database National Institutes of Health.

Seegal, R. F. (2009). Developmental Neuroendocrine Effects of PCBs and PBDEs: Parallels with ADHD. RePORTER Database National Institutes of Health.

Seegal, R. F. (2010). Developmental Neuroendocrine Effects of PCBs and PBDEs: Parallels with ADHD. RePORTER Database National Institutes of Health.

Segall, Y., et al. (2003). "Major intermediates in organophosphate synthesis (PCl<sub>3</sub>, POCl<sub>3</sub>, PSCl<sub>3</sub>, and their diethyl esters) are anticholinesterase agents directly or on activation." *Chem Res Toxicol* 16(3): 350-356.

Seidler, R. J., et al. (1972). "Molecular heterogeneity of the *Bdellovibrios*: evidence of two new species." *J Bacteriol* 109(1): 209-217.

Selikoff, I. J. (1979). "Polybrominated biphenyls in Michigan (abstract only)." *Proceedings of the Royal Society of London - Biological Sciences* 205(1158): 153-156.

Seo, J. J., et al. (2007). "Anxiolytic-like effects of obovatol isolated from *Magnolia obovata*: involvement of GABA/benzodiazepine receptors complex." *Prog Neuropsychopharmacol Biol Psychiatry* 31(7): 1363-1369.

- Serati, M., et al. (2011). "The impact of brief depressive episodes on the outcome of bipolar and major depressive disorder: A 1-year prospective study." *European Neuropsychopharmacology* 21: S422.
- Shah, N. C. (2010). Polybrominated diphenyl ether (PBDE) exposure in North Americans: Cause for concern? 1474587 M.P.H., The University of Texas School of Public Health.
- Shah, R. C. (2011). "Open CBD exploration how and when." *HPB* 13: 160.
- Shahbaz, M., et al. (1986). "Noncovalent intercalative complex formation and kinetic flow linear dichroism of racemic syn- and anti-benzo[a]pyrenediol epoxide-DNA solutions." *Biochemistry* 25(11): 3290-3296.
- Shang, H. T., et al. (2014). "The presence of polychlorinated biphenyls in yellow pigment products in China with emphasis on 3,3'-dichlorobiphenyl (PCB 11)." *Chemosphere* 98: 44-50.
- Shanks, D., et al. (2006). "Synthesis and antioxidant profile of all-rac-(alpha)-selenotocopherol." *Journal of Organic Chemistry* 71(3): 1033-1038.
- Shanks, R. M. Q. and D. E. Kadouri (2014). "Predatory prokaryotes wage war against eye infections." *Future Microbiology* 9(4): 429-432.
- Shao, J., et al. (2010). Flow cytometric analysis of BDE 47 mediated injury to rainbow trout gill epithelial cells. *Aquat Toxicol.* 97: 42-50. [Aquatic toxicology (Amsterdam, Netherlands)].
- Sharma, R. P. and P. G. Watanabe (1973). "Metabolism and elimination of tri-o-tolyl phosphate (TOTP), a neurotoxic organophosphate, in chicken." *Toxicol. Appl. Pharmacol.* 25(3).
- Sharp, F. R. (2008). Core D: Molecular Genomics Core. RePORTER Database National Institutes of Health.
- Sharp, F. R. (2009). Core D: Molecular Genomics Core. RePORTER Database National Institutes of Health.
- Sharp, F. R. (2010). Core D: Molecular Genomics Core. RePORTER Database National Institutes of Health.
- Sharp, F. R. (2012). Core D: Molecular Genomics Core. RePORTER Database National Institutes of Health.

- Shaw, S. (2010). "Halogenated flame retardants: do the fire safety benefits justify the risks?" *Reviews on environmental health* 25(4): 261-306.
- Shea, T. B. and E. Rogers (2014). "Lifetime requirement of the methionine cycle for neuronal development and maintenance." *Curr Opin Psychiatry*. 27(2): 138-142. [Current opinion in psychiatry].
- Sherman, A. D. and E. M. Gal (1977). "Cerebral metabolism of intraventricular [3H]-fenfluramine." *Neuropharmacology* 16(5): 309-315.
- Shi, L. S., et al. (2010). "Solvent Effects in the Polyethylene Terephthalate Surface Modification by Cold Argon Plasma-Induced Grafting Polymerization of Methacrylic Acid." *Journal of Applied Polymer Science* 117(3): 1460-1468.
- Shi, X. X., et al. (2008). "Synthesis of an industrially important zinc borate, 2ZnO center dot 3B(2)O(3)center dot 3H(2)O, by a rheological phase reaction method." *Powder Technology* 186(3): 263-266.
- Shibutani, M., et al. (2011). "Reply to Comment on " Impaired oligodendroglial development by decabromodiphenyl ether in rat offspring after maternal exposure from mid-gestation through lactation" [Reprod. Toxicol. 31(1) (2011) 86-94]." *Reproductive Toxicology* 32(3): 375-378.
- Shimizu, R. (2014). "Iodotyrosine deiodinase, a novel target of environmental halogenated chemicals for disruption of the thyroid hormone system in mammals." *Biological and Pharmaceutical Bulletin* 37(9): 1430-1434.
- Shinozaki, R., et al. (1999). "Association of benzo(a)pyrene-diol-epoxide-deoxyribonucleic acid (BPDE-DNA) adduct level with aging in male smokers and nonsmokers." *Archives of Environmental Health* 54(2): 79-85.
- Shirai, H., et al. (1996). "Metal complexes of partially phosphorylated poly(vinyl alcohol) - Functions and applications." *Macromolecular Symposia* 105: 217-222.
- Shlosberg, A., et al. (2011). "A database of avian blood spot examinations for exposure of wild birds to environmental toxicants: The DABSE biomonitoring project." *Journal of Environmental Monitoring* 13(6): 1547-1558.
- Shores, M. M. and A. M. Matsumoto (2014). Testosterone, aging and survival: biomarker or deficiency. *Curr Opin Endocrinol Diabetes Obes*. 21: 209-216. [Current opinion in endocrinology, diabetes, and obesity].
- Shreffler, C. A. (2013). "Introduction to the Research of the Outstanding New Environmental Health Scientists." *Journal of Biochemical and Molecular Toxicology* 27(1, Sp. Iss. SI): 1-2.



- Shrestha, S., et al. (2015). "Perfluoroalkyl substances and thyroid function in older adults." *Environment International* 75: 206-214.
- Siddiqi, M. A., et al. (2003). "Polybrominated diphenyl ethers (PBDEs): new pollutants-old diseases." *Clin Med Res* 1(4): 281-290.
- Silva, B. T., et al. (2012). "Fathers support on breastfeeding: An integrative review." *Revista Paulista de Pediatria* 30(1): 122-130.
- Silva, P. T., et al. (2009). Phenanthrene and pyrene oxidation in contaminated soils using Fenton's reagent. *J Hazard Mater.* 161: 967-973. [Journal of hazardous materials].
- Simon, G. E. (1992). "Epidemic multiple chemical sensitivity in an industrial setting." *Toxicology and Industrial Health* July Aug 8(4): 41-46.
- Sinclair, J. G. and G. F. Lo (1977). "The blockade of serotonin uptake and the meperidine-monoamine oxidase inhibitor interaction." *Proc West Pharmacol Soc* 20: 373-374.
- Singh, K., et al. (2014). "Association between environmental contaminants and health outcomes in indigenous populations of the Circumpolar North." *Int J Circumpolar Health* 73: 25808.
- Siniscalco, D., et al. (2013). "Epigenetic findings in autism: New perspectives for therapy." *International Journal of Environmental Research and Public Health* 10(9): 4261-4273.
- Sinnwell, S. and H. Ritter (2007). "Recent advances in microwave-assisted polymer synthesis." *Australian Journal of Chemistry* 60(10): 729-743.
- Slotkin, T. A., et al. (2013). "BDE99 (2,2',4,4',5-pentabromodiphenyl ether) suppresses differentiation into neurotransmitter phenotypes in PC12 cells." *Neurotoxicol Teratol* 37: 13-17.
- Sluys, R. and L. F. Bush (1988). "ON PENTACOELUM-PUNCTATUM NEW-COMBINATION AN AMPHI-ATLANTIC MARINE TRICLAD PLATYHELMINTHES TRICLADIDA MARICOLA." *Transactions of the American Microscopical Society* 107(2): 162-170.
- Smith, P. N., et al. (2007). "Contaminant exposure in terrestrial." *Environmental Pollution* 150(1): 41-64.
- Smits, J. E. G. and K. J. Fernie (2013). "Avian wildlife as sentinels of ecosystem health." *Comparative Immunology Microbiology and Infectious Diseases* 36(3): 333-342.

Sobral, F. R. and C. J. G. Campos (2012). "THE USE OF ACTIVE METHODOLOGY IN NURSING CARE AND TEACHING IN NATIONAL PRODUCTIONS: AN INTEGRATIVE REVIEW." *Revista Da Escola De Enfermagem Da Usp* 46(1): 208-218.

Sockett, R. E. (2009). "Predatory Lifestyle of *Bdellovibrio bacteriovorus*." *Annual Review of Microbiology* 63: 523-539.

Soliman, Z. R. and M. I. Mohamed (1972). "BIOLOGICAL STUDIES ON THE SOIL INHABITING BDELLID MITE *SPINIBDELLA-BIFURCATA* ACARINA BDELLIDAE IN UNITED-ARAB-REPUBLIC." *Zeitschrift fuer Angewandte Entomologie* 70(1): 15-23.

Soliman, Z. R. and M. I. Mohamed (1972). "ON THE DEVELOPMENT AND BIOLOGY OF THE PREDACIOUS MITE *NEOMOLGUS-AEGYPTIACUS* ACARINA BDELLIDAE." *Zeitschrift fuer Angewandte Entomologie* 71(1): 90-95.

Solomon, G. M. and A. M. Huddle (2002). "Low levels of persistent organic pollutants raise concerns for future generations." *Journal of Epidemiology and Community Health* 56(11): 826-827.

Solomon, G. M. and P. M. Weiss (2002). "Chemical contaminants in breast milk: time trends and regional variability." *Environ Health Perspect.* 110(6): A339-347. (Levesque et al.).

Somers, E. (1984). "Risk estimation for environmental chemicals as a basis for decision making." *Regul Toxicol Pharmacol* 4(2): 99-106.

Song, J., et al. (2014). "Decabrominated diphenyl ether (BDE-209) and/or BDE-47 exposure alters protein expression in purified neural stem/progenitor cells determined by proteomics analysis." *Int J Dev Neurosci* 33: 8-14.

Song, R., et al. (2009). "Cytotoxicity and gene expression profiling of two hydroxylated polybrominated diphenyl ethers in human H295R adrenocortical carcinoma cells." *Toxicol Lett* 185(1): 23-31.

Song, Y., et al. (2012). "Thyroid endocrine dysregulation and erythrocyte DNA damage associated with PBDE exposure in juvenile crucian carp collected from an e-waste dismantling site in Zhejiang Province, China." *Environ Toxicol Chem* 31(9): 2047-2051.

Sonne, C., et al. (2012). "Blood plasma clinical-chemical parameters as biomarker endpoints for organohalogen contaminant exposure in Norwegian raptor nestlings." *Ecotoxicology and Environmental Safety* 80: 76-83.

Sonne, C., et al. (2010). "Relationships between organohalogen contaminants and blood plasma clinical-chemical parameters in chicks of three raptor species from Northern Norway." *Ecotoxicology and Environmental Safety* 73(1): 7-17.

Soon, J. M. and R. N. Baines (2012). "Aquaculture Farm Food Safety and Diseases Risk Assessment (AquaFRAM): Development of a spreadsheet tool for salmon farms." *Aquacultural Engineering* 49: 35-45.

Soontornniyomkij, V., et al. (2014). HIV protease inhibitor exposure predicts cerebral small vessel disease. *Aids*. 28: 1297-1306. [AIDS (London, England)].

Sostare, J., et al. (2013). "An investigation into the toxicity and genotoxicity of brominated flame retardants in SHSY-5Y cells." *Toxicology Letters* 221: S140-S141.

Souza, A. O., et al. (2013). "BDE-99 congener induces cell death by apoptosis of human hepatoblastoma cell line - HepG2." *Toxicol In Vitro* 27(2): 580-587.

Soyuer, F., et al. (2007). "Sociodemographic and clinical profile in cerebral infarction and hemorrhage." *Turk Serebrovaskuler Hastaliklar Dergisi* 13(1): 3-7.

Spitz, M. R., et al. (2003). "Genetic susceptibility to lung cancer: The role of DNA damage and repair." *Cancer Epidemiology Biomarkers & Prevention* 12(8): 689-698.

Spivey, A. (2012). "Decoding neurodevelopment: Findings on environmental exposures and synaptic plasticity." *Environmental Health Perspectives* 120(2): A70-A75.

Sprague, G. L., et al. (1984). "Assessment of the delayed neurotoxic potential of isopropyl triphenylphosphate using a nontraditional testing strategy." *J Toxicol Environ Health* 14(5-6): 773-788.

Sprague, G. L., et al. (1981). "NEUROTOXICITY OF 2 ORGANO-PHOSPHORUS ESTER FLAME RETARDANTS IN HENS." *Journal of Toxicology and Environmental Health* 8(3): 507-518.

Sprague, G. L., et al. (1981). "Neurotoxicity of two organophosphorus ester flame retardants in hens." *J Toxicol Environ Health* 8(3): 507-518.

Stadler, J. (2011). *DEVELOPMENTAL AND REPRODUCTIVE TOXICOLOGY*. Oxford, Blackwell Science Publ.

Stalter, D., et al. (2013). "Do contaminants originating from state-of-the-art treated wastewater impact the ecological quality of surface waters?" *PLoS One* 8(4): e60616.

Stapleton, H. M. (2011). Deiodinase Activity as a Biomarker of Response to Brominated Flame Retardants. RePORTER Database National Institutes of Health.

Stapleton, H. M. (2012). Deiodinase Activity as a Biomarker of Response to Brominated Flame Retardants. RePORTER Database National Institutes of Health.

- Stapleton, H. M., et al. (2014). "Flame retardant associations between children's handwipes and house dust." *Chemosphere* 116: 54-60.
- Stasinska, A., et al. (2011). "A systematic review of pbdes in dust comparing concentrations across home, office and vehicle environments and country." *Epidemiology* 22: S61-S62.
- Staskal, D., et al. (2006). "Effect Of Age On Tissue Distribution Of BDE 47 In Mice." *Toxicol Sci* 90(1-S): 122-123.
- Stavenes Andersen, I., et al. (2009). "Effects of methyl mercury in combination with polychlorinated biphenyls and brominated flame retardants on the uptake of glutamate in rat brain synaptosomes: a mathematical approach for the study of mixtures." *Toxicol Sci* 112(1): 175-184.
- Ste-Marie, N., et al. (2012). "Effects of polybrominated diphenyl ethers on thyroid hormones in pregnant women and their newborn children." *American Journal of Epidemiology* 176(1): 80.
- Stieger, G., et al. (2014). "Assessing the persistence, bioaccumulation potential and toxicity of brominated flame retardants: Data availability and quality for 36 alternative brominated flame retardants." *Chemosphere* 116: 118-123.
- Strauch, E., et al. (2007). "Predatory mechanisms of *Bdellovibrio* and like organisms." *Future Microbiology* 2(1): 63-73.
- Sugrue, M. F. and I. McIndewar (1976). "Effect of blockade of 5-hydroxytryptamine re-uptake on drug-induced antinociception in the rat." *J Pharm Pharmacol* 28(5): 447-448.
- Suk, W. A., et al. (2003). "Environmental hazards to children's health in the modern world." *Mutation Research - Reviews in Mutation Research* 544(2-3): 235-242.
- Sun, F. and Q. Zhou (2005). "[Research advance on environmental exposure and ecotoxicological effects of polybrominated diphenyl ethers (PBDEs)]." *Ying Yong Sheng Tai Xue Bao* 16(2): 379-384.
- Sun, H. H., et al. (1983). "AVRAINVILLEOL A BROMINATED DI PHENYL METHANE DERIVATIVE WITH FEEDING DETERRENT PROPERTIES FROM THE TROPICAL GREEN ALGA AVRAINVILLEA-LONGICAULIS." *Phytochemistry* (Oxford) 22(3): 743-746.
- Sun, R. B., et al. (2012). "Cytotoxicity and Apoptosis Induction in Human HepG2 Hepatoma Cells by Decabromodiphenyl Ethane." *Biomedical and Environmental Sciences* 25(5): 495-501.

- Sutton, P., et al. (2012). "Toxic environmental chemicals: The role of reproductive health professionals in preventing harmful exposures." *American Journal of Obstetrics and Gynecology* 207(3): 164-173.
- Suvorov, A., et al. (2011). "Does 2,2',4,4'-tetrabromodiphenyl ether interact directly with thyroid receptor?" *J Appl Toxicol* 31(2): 179-184.
- Suvorov, A., et al. (2009). "Perinatal exposure to low-dose BDE-47, an emergent environmental contaminant, causes hyperactivity in rat offspring." *Neonatology* 95(3): 203-209.
- Suvorov, A. and L. Takser (2008). "Facing the challenge of data transfer from animal models to humans: the case of persistent organohalogenes." *Environ Health* 7(58).
- Suvorov, A. and L. Takser (2011). "Delayed response in the rat frontal lobe transcriptome to perinatal exposure to the flame retardant BDE-47." *J Appl Toxicol* 31(5): 477-483.
- Suyama, T. L., et al. (2010). "Ichthyotoxic brominated diphenyl ethers from a mixed assemblage of a red alga and cyanobacterium: structure clarification and biological properties." *Toxicon* 55(2-3): 204-210.
- Symeonides, C., et al. (2013). "Environmental chemical contributions to ADHD and the externalising disorders of childhood-a review of epidemiological evidence." *J Environ Immunol Toxicol* 1(2): 92-104.
- Szabo, D., et al. (2012). "Systems biology approach for better understanding of mechanisms of neurodevelopment toxicity: A case study using the major flame retardant HBCD." *Neurotoxicology and Teratology* 34(3): 379.
- Szabo, D. T., et al. (2009). Effects of perinatal PBDE exposure on hepatic phase I, phase II, phase III, and deiodinase 1 gene expression involved in thyroid hormone metabolism in male rat pups. *Toxicol Sci.* 107: 27-39. [Toxicological sciences : an official journal of the Society of Toxicology].
- Szabo, I., et al. (2007). "Disulfide bond rearrangement during regioselective oxidation in PhS(O)Ph/CH<sub>3</sub>SiCl<sub>3</sub> mixture for the synthesis of alpha-conotoxin GI." *Biopolymers* 88(1): 20-28.
- Szpir, M. (2006). "New thinking on neurodevelopment." *Environmental Health Perspectives* 114(2): A100-A107.
- Szychowski, K. A. and A. K. Wojtowicz (2013). "Components of plastic disrupt the function of the nervous system." *Postepy Higieny I Medycyny Doswiadczalnej* 67: 499-506.

Ta, N., et al. (2014). "Toxicity of TDCPP and TCEP on PC12 cell: changes in CAMKII, GAP43, tubulin and NF-H gene and protein levels." *Toxicol Lett* 227(3): 164-171.

Ta, T. A., et al. (2011). "Bioaccumulation and behavioral effects of 2,2',4,4'-tetrabromodiphenyl ether (BDE-47) in perinatally exposed mice." *Neurotoxicol Teratol* 33(3): 393-404.

Ta, T. N., et al. (2008). "Perinatal exposure to 2,2',4,4'-tetrabromodiphenyl ether (PBDE-47) retards growth and delays neurodevelopment of C57BL6/J mice." *Birth Defects Research* 82(5): 383.

Tachino, N., et al. (1994). "MECHANISMS OF THE IN-VITRO ANTIMUTAGENIC ACTION OF CHLOROPHYLLIN AGAINST BENZO A PYRENE - STUDIES OF ENZYME-INHIBITION, MOLECULAR-COMPLEX FORMATION AND DEGRADATION OF THE ULTIMATE CARCINOGEN." *Mutation Research* 308(2): 191-203.

Tagliaferri, S. "Neurotoxicity of polybrominated diphenyl ethers (PBDEs)." from <http://hdl.handle.net/1889/1647>.

Tagliaferri, S., et al. (2010). "Low concentrations of the brominated flame retardants BDE-47 and BDE-99 induce synergistic oxidative stress-mediated neurotoxicity in human neuroblastoma cells." *Toxicol In Vitro* 24(1): 116-122.

Takahashi, Y. K., et al. (2004). "Topographic representation of odorant molecular features in the rat olfactory bulb." *Journal of Neurophysiology* 92(4): 2413-2427.

Talsness, C. E. (2008). "Overview of toxicological aspects of polybrominated diphenyl ethers: a flame-retardant additive in several consumer products." *Environ Res* 108(2): 158-167.

Talsness, C. E., et al. (2009). "Components of plastic: experimental studies in animals and relevance for human health." *Philos Trans R Soc Lond B Biol Sci.* 364(1526): 2079-2096. [Philosophical transactions of the Royal Society of London. Series B, Biological sciences].

Talsness, C. E., et al. (2008). "In utero and lactational exposures to low doses of polybrominated diphenyl ether-47 alter the reproductive system and thyroid gland of female rat offspring." *Environmental Health Perspectives* 116(3): 308-314.

Tamm, J. C. (1984). "SURVIVING LONG SUBMERGENCE IN THE EGG STAGE A SUCCESSFUL STRATEGY OF TERRESTRIAL ARTHROPODS LIVING ON FLOOD PLAINS COLLEMBOLA ACARI DIPTERA." *Oecologia (Berlin)* 61(3): 417-419.

- Tamura, S., et al. (1998). "Human PEX1 cloned by functional complementation on a CHO cell mutant is responsible for peroxisome-deficient Zellweger syndrome of complementation group I." *Proceedings of the National Academy of Sciences of the United States of America* 95(8): 4350-4355.
- Tana, et al. (2013). "Toxic Effect of Tri(2,3-Dichloropropyl) Phosphate Flame Retardant on Rare Minnow (*Gobiocypris rarus*)." *Asian Journal of Ecotoxicology* 8(5): 757-762.
- Tanabe, S. (2004). "PBDEs, an emerging group of persistent pollutants." *Marine Pollution Bulletin* 49(5-6): 369-370.
- Tanaka, H., et al. (1985). "Factors influencing fetal cerebral function with caffeine." 1984 Annual Meeting of the Research Team on Mental Retardation and Brain Damage, Todofuken Kaikan, Japan, Feb. 1-2, 1985. *Brain Dev* 7(5): 1986.
- Tang, B.-h., et al. (2008). "Environmental pollution by polybrominated diphenyl ethers (PBDEs) and their ecological chemical behaviors: A review." *Shengtaixue Zazhi* 27(1): 96-104.
- Tang, X. D., et al. (1998). "Synthesis and characterization of poly(bisphenol A-phenylphosphonate)." *Acta Polymerica Sinica*(3): 372-376.
- Tao, H. and T. Nakazato (2009). "A Test Method for Determining Volatility and Degradability of Polybrominated Diphenylethers Using Headspace/Gas Chromatograph/Inductively Coupled Plasma Mass Spectrometer." *Bunseki Kagaku* 58(5): 363-372.
- Tatar, M., et al. (1986). "Changes in protective reflexes in the respiratory tract during 5 hours of hypercapnia in conscious cats." *Bratislavsk? lek?rske listy* 85(5): 533-540.
- Tatekawa, Y., et al. (2003). "Matrix metalloproteinase-9 and tissue inhibitor of metalloproteinase-1: expression in the lung of fetal rats with nitrofen-induced diaphragmatic hernia." *Pediatr Surg Int* 19(1-2): 25-28.
- Tawil, I., et al. (2012). "Family presence during brain death evaluation: A prospective randomized trial." *Critical Care Medicine* 40(12): 89.
- Taylor, M. E. (1970). "LOCO MOTION IN SOME EAST AFRICAN VIVERRIDS." *Journal of Mammalogy* 51(1): 42-51.
- Taylor, M. E. (1976). "THE FUNCTIONAL ANATOMY OF THE HIND LIMB OF SOME AFRICAN VIVERRIDAE CARNIVORA." *Journal of Morphology* 148(2): 227-254.
- Taylor, M. E. (1987). "BDEOGALE-CRASSICAUDA." *Mammalian Species*(294): 1-4.

Taylor, M. E. and A. G. Hannam (1987). "TOOTH MICROWEAR AND DIET IN THE AFRICAN VIVERRIDAE." *Canadian Journal of Zoology* 65(7): 1696-1702.

Taylor, M. M., et al. (2002). "Perinatal exposure to a polybrominated diphenyl ether mixture (DE-71) disrupts thyroid hormones but not neurobehavioral development." *Toxicologist* 66(1-S): 133.

Taylor, M. M., et al. (2003). "Perinatal exposure to a polybrominated diphenyl ether mixture (DE-71): Disruption of thyroid homeostasis and neurobehavioral development." *Toxicological Sciences* 72(S-1): 124.

Taylor, M. M., et al. (2003). "Perinatal exposure to a polybrominated diphenyl ether mixture (DE-71): disruption of thyroid homeostasis and neurobehavioral development." *Toxicologist* 72(S-1): 124.

Thomas, G. R. and Y. Shnayder (2010). *Genomic Evaluation of Head and Neck Cancer*, Elsevier Science Bv, Sara Burgerhartstraat 25, Po Box 211, 1000 Ae Amsterdam, Netherlands.

Thompson, C. K. (2013). Effects of environmental thyroid hormone disrupting compounds on CNS development. RePORTER Database National Institutes of Health.

Thundiyil, J. G., et al. (2007). "Transgenerational Exposures: Persistent Chemical Pollutants in the Environment and Breast Milk." *Pediatric Clinics of North America* 54(1): 81-101.

Thuresson, K., et al. (2006). "Polybrominated diphenyl ether exposure to electronics recycling workers - a follow up study." *Chemosphere* 64(11): 1855-1861.

Thuvander, A. and K. Victorin (2006). "Chapter 11: Environment-related health - Focus on children." *Scandinavian Journal of Public Health* 34(SUPPL. 67): 247-255.

Tian, P. C., et al. (2015). "2,2',4,4'-Tetrabromodiphenyl ether promotes human neuroblastoma SH-SY5Y cells migration via the GPER/PI3K/Akt signal pathway." *Hum Exp Toxicol*.

Tiedeken, J. A. and J. S. Ramsdell (2010). "Zebrafish seizure model identifies p,p -DDE as the dominant contaminant of fetal California sea lions that accounts for synergistic activity with domoic acid." *Environ Health Perspect* 118(4): 545-551.

Tilson, H. A. (1992). "Study Design Considerations in Developmental Neurotoxicology." *Neurotoxicology and Teratology* 14(3): 199-203.



Tilson, H. A., et al. (1979). "MICE EXPOSED PERINATALLY TO FIREMASTER (FF-1) SHOW NEURO-BEHAVIORAL ALTERATIONS WHEN TESTED DURING ADULTHOOD." *Pharmacologist* 21(3): 187-187.

Tilson, H. A. and P. A. Cabe (1978). "Behavioral toxicologic effects of polybrominated biphenyl compounds in rodents." *Toxicology and Applied Pharmacology* 45(1): No. 268.

Tilson, H. A. and P. A. Cabe (1979). "Studies on the neurobehavioral effects of polybrominated biphenyls in rats." *Ann N Y Acad Sci* 320: 325-336.

Tilson, H. A., et al. (1978). "Behavioral and neurological toxicity of polybrominated biphenyls in rats and mice." *Environ Health Perspect* 23: 257-263.

Tilson, H. A., et al. (1990). "Acute exposure to tris(2-chloroethyl)phosphate produces hippocampal neuronal loss and impairs learning in rats." *Toxicol Appl Pharmacol* 106(2): 254-269.

Tilson, H. A., et al. (1990). "Acute Exposure to Tris(2-chloroethyl)phosphate Produces Hippocampal Neuronal Loss and Impairs Learning in Rats." *Toxicology and Applied Pharmacology* 106(2): 254-269.

Timme-Laragy, A. R., et al. (2006). "Developmental and behavioral effects of embryonic exposure to the polybrominated diphenylether mixture DE-71 in the killifish (*Fundulus heteroclitus*)." *Chemosphere* 62(7): 1097-1104.

Tinelli, F., et al. (2012). "Perception of motion, time and number in preterm infants." *Developmental Medicine and Child Neurology* 54: 151.

Tofighi, R., et al. (2011). "Non-Dioxin-like Polychlorinated Biphenyls Interfere with Neuronal Differentiation of Embryonic Neural Stem Cells." *Toxicological Sciences* 124(1): 192-201.

Tofighi, R., et al. (2011). *Neural stem cells*. 56: 63-85.

Tomasek, A. A., et al. (2011). "Wastewater Indicator Compounds in Wastewater Effluent, Surface Water, and Bed Sediment in the St. Croix National Scenic Riverway and Implications for Water Resources and Aquatic Biota, Minnesota and Wisconsin, 2007-08." *Govt Reports Announcements & Index*(13): 52.

Toms, L. M., et al. (2009). "Serum polybrominated diphenyl ether (PBDE) levels are higher in children (2-5 years of age) than in infants and adults." *Environ Health Perspect*. 117(9): 1461-1465. (Levesque et al.).

Trecki, J. (2012). "Statistical significance versus biological relevance: A case study in neurobehavioral testing." *Neurotoxicology and Teratology* 34(3): 380.

Trenz, K., et al. (2003). "Modifications of the comet assay for an improved use in human biomonitoring." *Naunyn-Schmiedeberg's Archives of Pharmacology* 367(Supplement 1): R164.

Trudel, D., et al. (2011). "Exposure of the Irish population to PBDEs in food: consideration of parameter uncertainty and variability for risk assessment." *Food Additives and Contaminants Part A-Chemistry Analysis Control Exposure & Risk Assessment* 28(7): 943-955.

Truong, L., et al. (2014). "A rapid throughput approach identifies cognitive deficits in adult zebrafish from developmental exposure to polybrominated flame retardants." *Neurotoxicology* 43: 134-142.

Tsamo, C. (2014). "E-waste assessment in Cameroon. Case study: Town of Maroua." *International Journal of ChemTech Research* 6(1): 681-690.

Tulinius, H., et al. (1997). "Risk factors for malignant diseases: A cohort study on a population of 22,946 Icelanders." *Cancer Epidemiology Biomarkers & Prevention* 6(11): 863-873.

Tunnacliffe, A. and J. Lapinski (2003). "Resurrecting Van Leeuwenhoek's rotifers: A reappraisal of the role of disaccharides in anhydrobiosis." *Philosophical Transactions of the Royal Society of London B Biological Sciences* 358(1438): 1755-1771.

Tuomisto, J. (2006). "Protecting our unborn children: How to measure exposure to thousands of chemicals?" *Archives of Disease in Childhood* 91(8): 627-628.

Turyk, M. E., et al. (2012). "Risks and benefits of consumption of great lakes fish." *Environmental Health Perspectives* 120(1): 11-18.

Tyler, T. D. and R. E. Tessel (1979). "Amphetamine's locomotor-stimulant and norepinephrine-releasing effects: evidence for selective antagonism by nisoxetine." *Psychopharmacology (Berl)* 64(3): 291-296.

Umeh, V., et al. (2007). "Damage on sweet orange fruits by the mite *Polyphagotarsonemus latus* (Banks) and the population of its predatory mites in Southwestern Nigeria." *Fruits* 62(3): 149-156.

Umezu, T., et al. (1998). "Tris(2-chloroethyl)phosphate increases ambulatory activity in mice: pharmacological analyses of its neurochemical mechanism." *Toxicol Appl Pharmacol* 148(1): 109-116.

Unuvar, T. and A. Buyukgebiz (2012). "Fetal and neonatal endocrine disruptors." *JCRPE Journal of Clinical Research in Pediatric Endocrinology* 4(2): 51-60.

- Usenko, C. Y., et al. (2015). "Comparison of PBDE congeners as inducers of oxidative stress in zebrafish." *Environ Toxicol Chem.*
- Usenko, C. Y., et al. (2012). "Hydroxylated PBDEs induce developmental arrest in zebrafish." *Toxicol Appl Pharmacol* 262(1): 43-51.
- Usenko, C. Y., et al. (2011). "PBDE developmental effects on embryonic zebrafish." *Environ Toxicol Chem* 30(8): 1865-1872.
- Vagula, M. C., et al. (2011). "Effects of BDE-85 on the oxidative status and nerve conduction in rodents." *Int J Toxicol* 30(4): 428-434.
- Vahabi, H., et al. (2015). "Effects of ageing on the fire behaviour of flame-retarded polymers: a review." *Polymer International* 64(3): 313-328.
- Valciukas, J. A., et al. (1979). "The neurotoxicity of polybrominated biphenyls: results of a medical field survey." *Ann. N.Y. Acad. Sci.* 320: 337-367.
- Valciukas, J. A., et al. (1978). "Comparative neurobehavioral study of a polybrominated biphenyl-exposed population in michigan and a nonexposed group in wisconsin." *Environ. Health Perspect* 23: 199-210.
- Vallero, R. O., et al. (2009). "Epigenetic interaction between MECP2 and organic pollutants in murine neurodevelopment." *Cellular Oncology* 31(2): 149-150.
- Van De Water, J. A. (2013). Project 3: Immune Environment Interaction and Neurodevelopment. RePORTER Database National Institutes of Health.
- Van Den Hazel, P., et al. (2006). "Today's epidemics in children: Possible relations to environmental pollution and suggested preventive measures." *Acta Paediatrica, International Journal of Paediatrics* 95(SUPPL. 453): 18-25.
- Van den Steen, E., et al. (2011). "Organohalogenated contaminants in eggs of rockhopper penguins (*Eudyptes chrysocome*) and imperial shags (*Phalacrocorax atriceps*) from the Falkland Islands." *Science of the Total Environment* 409(14): 2838-2844.
- van der Ven, L., et al. (2005). "Endocrine Disrupting And Neurobehavioural Effects Of The Brominated Flame Retardant Tbbpa In A Reproduction Study In Rats." *Reprod Toxicol* 20(3): 486-487.
- van der Ven, L. T., et al. (2009). "Endocrine effects of hexabromocyclododecane (HBCD) in a one-generation reproduction study in Wistar rats." *Toxicol Lett* 185(1): 51-62.

Van der Ven, L. T., et al. (2008). "Endocrine effects of tetrabromobisphenol-A (TBBPA) in Wistar rats as tested in a one-generation reproduction study and a subacute toxicity study." *Toxicology* 245(1-2): 76-89.

Van Kanegan, M. J., et al. (2005). "Distinct protein phosphatase 2A heterotrimers modulate growth factor signaling to extracellular signal-regulated kinases and Akt." *J Biol Chem* 280(43): 36029-36036.

Van Schmidt, N. D., et al. (2012). "Effects of chronic polybrominated diphenyl ether exposure on gonadal development in the northern leopard frog, *Rana pipiens*." *Environ Toxicol Chem* 31(2): 347-354.

Van Thriel, C., et al. (2012). "Translating neurobehavioural endpoints of developmental neurotoxicity tests into in vitro assays and readouts." *NeuroToxicology* 33(4): 911-924.

Vargas Marcos, F. (2005). "Environmental pollution as determinant factor of health." *Revista Espanola de Salud Publica* 79(2): 117-127.

Vastag, B. (2008). "EPA feels heat over flame retardant." *Nature* 452(7187): 513.

Vatanoglu-Lutz, E. E., et al. (2014). "Medicine in stamps: History of autism spectrum disorder (ASD) through philately." *Journal of Neurological Sciences* 31(2): 426-434.

Velencoso, M. M., et al. (2011). "Production of Polyether Polyols Using Phosphate Calcium Salt." *Journal of Macromolecular Science Part a-Pure and Applied Chemistry* 48(8): 569-576.

Velis, C. A. (2014). "Plastic waste in marine litter: Action now and at the source." *Waste Management and Research* 32(4): 251-253.

Verboven, N., et al. (2009). "Nest temperature and parental behaviour of Arctic-breeding glaucous gulls exposed to persistent organic pollutants." *Animal Behaviour* 77(2): 411-418.

Verboven, N., et al. (2010). "Adrenocortical function of Arctic-breeding glaucous gulls in relation to persistent organic pollutants." *Gen Comp Endocrinol* 166(1): 25-32.

Verma, P., et al. (2013). "Prophylactic efficacy of *Bacopa monnieri* on decabromodiphenyl ether (PBDE-209)-induced alterations in oxidative status and spatial memory in mice." *Asian Journal of Pharmaceutical and Clinical Research* 6(3): 242-247.

Verma, P., et al. (2014). "Neuromodulatory role of *Bacopa monnieri* on oxidative stress induced by postnatal exposure to decabromodiphenyl ether (PBDE -209) in neonate and young female mice." *Iran J Basic Med Sci* 17(4): 307-311.

- Verner, M. A., et al. (2011). "In vitro neurotoxicity data in human risk assessment of polybrominated diphenyl ethers (PBDEs): overview and perspectives." *Toxicol In Vitro* 25(8): 1509-1515.
- Verreault, J., et al. (2008). "Changes in prolactin in a highly organohalogen contaminated Arctic top predator seabird, the glaucous gull." *Gen Comp Endocrinol* 156(3): 569-576.
- Versace, A., et al. (2012). "Direct and indirect amygdala-prefrontal cortex fiber reconstruction in adults with bipolar disorder." *Biological Psychiatry* 71(8): 213S.
- Versace, A., et al. (2014). "Elevated serum measures of lipid peroxidation and abnormal prefrontal white matter in euthymic bipolar adults: toward peripheral biomarkers of bipolar disorder." *Molecular Psychiatry* 19(2): 200-208.
- Verwer, C. M., et al. (2007). "Effects of housing condition on experimental outcome in a reproduction toxicity study." *Regul Toxicol Pharmacol* 48(2): 184-193.
- Viberg, H. (2009). "Exposure to polybrominated diphenyl ethers 203 and 206 during the neonatal brain growth spurt affects proteins important for normal neurodevelopment in mice." *Toxicol Sci* 109(2): 306-311.
- Viberg, H. (2009). "Neonatal ontogeny and neurotoxic effect of decabrominated diphenyl ether (PBDE 209) on levels of synaptophysin and tau." *Int J Dev Neurosci* 27(5): 423-429.
- Viberg, H. and P. Eriksson (2011). "Differences in neonatal neurotoxicity of brominated flame retardants, PBDE 99 and TBBPA, in mice." *Toxicology* 289(1): 59-65.
- Viberg, H., et al. (2014). "Paracetamol (Acetaminophen) Administration During Neonatal Brain Development Affects Cognitive Function and Alters Its Analgesic and Anxiolytic Response in Adult Male Mice." *Toxicological Sciences* 138(1): 139-147.
- Viberg, H. and A. Fredriksson (2011). "Neonatal exposure to sucralose does not alter biochemical markers of neuronal development or adult behavior." *Nutrition* 27(1): 81-85.
- Viberg, H., et al. (2011). "Dose-dependent behavioral disturbances after a single neonatal Bisphenol A dose." *Toxicology* 290(2-3): 187-194.
- Viberg, H., et al. (2002). "Developmental exposure to a brominated flame-retardant, 2,2',4,4',5,5'-hexabromodiphenyl ether (PBDE 153) affects behaviour and cholinergic nicotinic receptors in brain of adult mice." *Toxicologist* 66(1-S): 132.
- Viberg, H., et al. (2002). "Neonatal exposure to the brominated flame retardant 2,2',4,4',5-pentabromodiphenyl ether causes altered susceptibility in the cholinergic transmitter system in the adult mouse." *Toxicol Sci* 67(1): 104-107.

Viberg, H., et al. (2003). "Neonatal exposure to polybrominated diphenyl ether (PBDE 153) disrupts spontaneous behaviour, impairs learning and memory, and decreases hippocampal cholinergic receptors in adult mice." *Toxicol Appl Pharmacol* 192(2): 95-106.

Viberg, H., et al. (2003). "Neonatal PBDE 99 exposure causes dose-response related behavioural derangements that are not sex or strain specific in mice." *Toxicological Sciences* 72(S-1): 126.

Viberg, H., et al. (2003). "Neonatal PBDE 99 exposure causes dose-response related behavioural derangements that are not sex or strain specific in mice." *Toxicologist* 72(S-1): 126.

Viberg, H., et al. (2004). "Comparative Developmental Neurotoxicity Of PBDE 99 In Two Different Mouse Strains And Rat." *Toxicologist* 78(1-S): 392.

Viberg, H., et al. (2004). "Investigations of strain and/or gender differences in developmental neurotoxic effects of polybrominated diphenyl ethers in mice." *Toxicol Sci* 81(2): 344-353.

Viberg, H., et al. (2004). "Neonatal exposure to the brominated flame-retardant, 2,2',4,4',5-pentabromodiphenyl ether, decreases cholinergic nicotinic receptors in hippocampus and affects spontaneous behaviour in the adult mouse." *Environ Toxicol Pharmacol* 17(2): 61-65.

Viberg, H., et al. (2005). "Deranged spontaneous behaviour and decrease in cholinergic muscarinic receptors in hippocampus in the adult rat, after neonatal exposure to the brominated flame-retardant, 2,2',4,4',5-pentabromodiphenyl ether (PBDE 99)." *Environ Toxicol Pharmacol* 20(2): 283-288.

Viberg, H., et al. (2005). "Developmental Neurotoxicity Of PBDEs In Mice And Rats." *Toxicol Sci* 84(1-S): 64.

Viberg, H., et al. (2007). "Changes in spontaneous behaviour and altered response to nicotine in the adult rat, after neonatal exposure to the brominated flame retardant, decabrominated diphenyl ether (PBDE 209)." *Neurotoxicology* 28(1): 136-142.

Viberg, H., et al. (2003). "Neurobehavioral derangements in adult mice receiving decabrominated diphenyl ether (PBDE 209) during a defined period of neonatal brain development." *Toxicol Sci* 76(1): 112-120.

Viberg, H., et al. (2006). "Decabrominated Diphenyl Ether (PBDE 209) Induces Neurotoxic Effects In The Neonatal And Adult Mouse After Neonatal Exposure." *Toxicol Sci* 90(1-S): 297-298.

- Viberg, H., et al. (2006). "Neonatal exposure to higher brominated diphenyl ethers, hepta-, octa-, or nonabromodiphenyl ether, impairs spontaneous behavior and learning and memory functions of adult mice." *Toxicol Sci* 92(1): 211-218.
- Viberg, H. and I. Lee (2012). "A single exposure to bisphenol A alters the levels of important neuroproteins in adult male and female mice." *Neurotoxicology* 33(5): 1390-1395.
- Viberg, H., et al. (2013). "Adult dose-dependent behavioral and cognitive disturbances after a single neonatal PFHxS dose." *Toxicology* 304: 185-191.
- Viberg, H., et al. (2008). "Neonatal exposure to decabrominated diphenyl ether (PBDE 209) results in changes in BDNF, CaMKII and GAP-43, biochemical substrates of neuronal survival, growth, and synaptogenesis." *Neurotoxicology* 29(1): 152-159.
- Viberg, H., et al. (2008). "Neonatal ketamine exposure results in changes in biochemical substrates of neuronal growth and synaptogenesis, and alters adult behavior irreversibly." *Toxicology* 249(2-3): 153-159.
- Viggiano, D. (2008). "The hyperactive syndrome: Metanalysis of genetic alterations, pharmacological treatments and brain lesions which increase locomotor activity." *Behavioural Brain Research* 194(1): 1-14.
- Vijverberg, H. P. and M. van den Berg (2004). "Re: Viberg H, et al. Neurobehavioral derangements in adult mice receiving decabrominated diphenyl ether (PBDE 209) during a defined period of neonatal brain development. *Toxicol Sci*. 2003 Nov;76(1):112-20." *Toxicol Sci* 79(1): 205-206; author reply 207-208.
- Vijverberg, H. P. M. and d. van (2004). "Untitled." *Toxicological Sciences* 79(1): 205-206.
- Vijverberg, H. P. M. and M. van den Berg (2004). "Letter to the editor (Levesque et al.)." *Toxicological Sciences* 79(1): 205-206.
- Villavicencio-Lorini, P., et al. (2011). "HDAC4 haploinsufficiency causes a recognizable pattern of facial dysmorphism and mild developmental delay." *Medizinische Genetik* 23(1): 125.
- Villavicencio-Lorini, P., et al. (2012). "2q37 deletion syndrome." *Medizinische Genetik* 24(1): 40-+.
- Villavicencio-Lorini, P., et al. (2012). "2q37 Deletion syndrome: Phenotypic variants of HDAC4 haploinsufficiency." *Medizinische Genetik* 24(1): 40-47.

- Villavicencio-Lorini, P., et al. (2013). "Phenotypic variant of Brachydactyly-mental retardation syndrome in a family with an inherited interstitial 2q37.3 microdeletion including HDAC4." *Eur J Hum Genet* 21(7): 743-748.
- Vizcaino, E., et al. (2014). Gestational weight gain and exposure of newborns to persistent organic pollutants. *Environ Health Perspect.* 122: 873-879. (Levesque et al.).
- Vogel, R. A., et al. (1981). "Differential effects of TRH, amphetamine, naloxone, and fenmetozole on ethanol actions: attenuation of the effects of punishment and impairment of aerial righting reflex." *Alcohol Clin Exp Res* 5(3): 386-392.
- Volk, H. E., et al. (2014). Autism spectrum disorder: interaction of air pollution with the MET receptor tyrosine kinase gene. *Epidemiology.* 25: 44-47. [Epidemiology (Cambridge, Mass.)].
- vom Saal, F. S., et al. (2008). "The plastic world: Sources, amounts, ecological impacts and effects on development, reproduction, brain and behavior in aquatic and terrestrial animals and humans." *Environmental Research* 108(2): 127-130.
- von Ehrenstein, O. S., et al. (2014). In utero exposure to toxic air pollutants and risk of childhood autism. *Epidemiology.* 25: 851-858. [Epidemiology (Cambridge, Mass.)].
- Vongphachan, V., et al. (2011). "Effects of Perfluoroalkyl Compounds on mRNA Expression Levels of Thyroid Hormone-Responsive Genes in Primary Cultures of Avian Neuronal Cells." *Toxicological Sciences* 120(2): 392-402.
- Vorih, D. C., et al. (2009). "Comparison of nitrile gloves and nitrile over Nomex gloves." *Air Med J* 28(6): 288-290, 302.
- Vrijheid, M., et al. (2014). "The human early-life exposome (HELIX): Project rationale and design." *Environmental Health Perspectives* 122(6): 535-544.
- Vrkoslavova, J., et al. (2011). "Bacterial Degradation of Polybrominated Diphenylethers." *Chemicke Listy* 105(9): 654-660.
- Waijers, S. L., et al. (2013). "Persistence, bioaccumulation, and toxicity of halogen-free flame retardants." *Rev Environ Contam Toxicol* 222: 1-71.
- Wahl, M., et al. (2010). "Polybrominated diphenyl ethers and arylhydrocarbon receptor agonists: Different toxicity and target gene expression." *Toxicol Lett* 198(2): 119-126.
- Walker, D. B., et al. (2009). "Changes in reproductive biomarkers in an endangered fish species (bonytail chub, *Gila elegans*) exposed to low levels of organic wastewater compounds in a controlled experiment." *Aquatic Toxicology* 95(2): 133-143.



Wallace, M. M. H. and J. A. Mahon (1973). "THE TAXONOMY AND BIOLOGY OF AUSTRALIAN BDELLIDAE ACARI PART 1 SUBFAMILIES BDELLINAE SPINIBDELLINAE AND CYTINAE." *Acarologia* (Paris) 14(4): 544-580.

Wallace, M. M. H. and M. C. Walters (1974). "THE INTRODUCTION OF BDELLODES-LAPIDARIA ACARI BDELLIDAE FROM AUSTRALIA INTO SOUTH AFRICA FOR THE BIOLOGICAL CONTROL OF SMINTHURUS-VIRIDIS COLLEMBOLA." *Australian Journal of Zoology* 22(4): 505-517.

Walter, K., et al. (2014). "Thyroid hormone disruption by persistent organic pollutants through altered calcium dynamics in pituitary thyrotroph cells." *Clinical and Translational Science* 7(3): 275.

Wan, Y., et al. (2010). "Hydroxylated polybrominated diphenyl ethers and bisphenol a in pregnant women and their matching fetuses: Placental transfer and potential risks." *Environmental Science and Technology* 44(13): 5233-5239.

Wang, B. L., et al. (2015). "Levels of polybrominated diphenyl ethers in settled house dust from urban dwellings with resident preschool-aged children in Nanjing, China." *Arch Environ Contam Toxicol* 68(1): 9-19.

Wang, C. S. and C. H. Lin (2000). "Synthesis and properties of phosphorus containing advanced epoxy resins." *Journal of Applied Polymer Science* 75(3): 429-436.

Wang, D. and Q. X. Li (2010). "Application of mass spectrometry in the analysis of polybrominated diphenyl ethers." *Mass Spectrom Rev* 29(5): 737-775.

Wang, D., et al. (2013). "Organochlorine pesticides in fish from Taihu Lake, China, and associated human health risk assessment." *Ecotoxicol Environ Saf* 98: 383-389.

Wang, F., et al. (2011). "Interaction of PFOS and BDE-47 co-exposure on thyroid hormone levels and TH-related gene and protein expression in developing rat brains." *Toxicological Sciences* 121(2): 279-291.

Wang, F., et al. (2011). "Tissue distribution and associated toxicological effects of decabrominated diphenyl ether in subchronically exposed male rats." *ISRN Toxicol* 2011: 989251.

Wang, F. C. Y. (2000). "Polymer additive analysis by pyrolysis-gas chromatography. II. Flame retardants." *Journal of Chromatography A* 886(1-2): 225-235.

Wang, G., et al. (2013). "Epigenetics and early life origins of chronic noncommunicable diseases." *Journal of Adolescent Health* 52(2 SUPPL.2): S14-S21.

Wang, L., et al. (2012). "The hormesis effect of BDE-47 in HepG2 cells and the potential molecular mechanism." *Toxicol Lett* 209(2): 193-201.

Wang, L. N., et al. (2013). Graft Copolymerization of Acrylamide onto Polyester-cotton Blended Fabric by Using Potassium Permanganate Redox System. *Advances in Textile Engineering and Materials*. H. Liu, Y. Yang, S. Shen et al. Stafa-Zurich, Trans Tech Publications Ltd. 627: 205-211.

Wang, Q., et al. (2014). "Bioconcentration and metabolism of BDE-209 in the presence of titanium dioxide nanoparticles and impact on the thyroid endocrine system and neuronal development in zebrafish larvae." *Nanotoxicology* 8 Suppl 1: 196-207.

Wang, Q., et al. (2015). "Bioconcentration and Transfer of the Organophorous Flame Retardant 1,3-dichloro 2-propyl phosphate (TDCPP) Causes Thyroid Endocrine Disruption and Developmental Neurotoxicity in Zebrafish Larvae." *Environ Sci Technol*.

Wang, Q., et al. (2015). "Bioconcentration, metabolism and neurotoxicity of the organophorous flame retardant 1,3-dichloro 2-propyl phosphate (TDCPP) to zebrafish." *Aquat Toxicol* 158: 108-115.

Wang, Q., et al. (2013). "Exposure of zebrafish embryos/larvae to TDCPP alters concentrations of thyroid hormones and transcriptions of genes involved in the hypothalamic-pituitary-thyroid axis." *Aquatic Toxicology* 126: 207-213.

Wang, R. Y., et al. (2005). "Human milk research for answering questions about human health." *Journal of Toxicology and Environmental Health-Part a-Current Issues* 68(20): 1771-1801.

Wang, S. J., et al. (2008). Vitamin B2 inhibits glutamate release from rat cerebrocortical nerve terminals. *Neuroreport*. 19: 1335-1338. [Neuroreport].

Wang, X., et al. (2015). "The developmental neurotoxicity of PBDEs: Effect of DE-71 on dopamine in zebrafish larvae." *Environ Toxicol Chem*.

Wang, X. F., et al. (2012). "Health risk assessment of lead for children in tinfoil manufacturing and e-waste recycling areas of Zhejiang Province, China." *Science of the Total Environment* 426: 106-112.

Wang, X. X., et al. (2013). "PF11 inhibits microglia-mediated neuroinflammation by inactivating NF-(kappa)B, Akt MAPKs pathways." *Acta Pharmacologica Sinica* 34: 134.

Wang, Y., et al. (2014). "Effects of BDE-209 exposure on sperm quality of prepubertal male rats." *Journal of Shanghai Jiaotong University (Medical Science)* 34(7): 1063-1066.

Wang, Z. W., et al. (2012). Synthesis and Characterization of Polysulfonyldiphenylene Phenylphosphonate with High Melting Range. *Advances in Chemical Engineering, Pts 1-3*. Y. X. Wen and F. H. Lei. Stafa-Zurich, Trans Tech Publications Ltd. 396-398: 2342-2345.

- Wania, F. and C. B. Dugani (2003). "Assessing the long-range transport potential of polybrominated diphenyl ethers: a comparison of four multimedia models." *Environ Toxicol Chem* 22(6): 1252-1261.
- Wapner, R. (2009). *Endocrine Disruption in Pregnant Women: Thyroid Disruption and Infant Development*. RePORTER Database National Institutes of Health.
- Wapner, R. (2010). *Endocrine Disruption in Pregnant Women: Thyroid Disruption and Infant Development*. RePORTER Database National Institutes of Health.
- Wapner, R. (2011). *Endocrine Disruption in Pregnant Women: Thyroid Disruption and Infant Development*. RePORTER Database National Institutes of Health.
- Waring, R. H. and R. M. Harris (2005). "Endocrine disruptors: a human risk?" *Mol Cell Endocrinol* 244(1-2): 2-9.
- Warner, B. G. and R. Chengalath (1988). "HOLOCENE FOSSIL HABROTROCHA-ANGUSTICOLLIS BDELLOIDEA ROTIFERA IN NORTH AMERICA." *Journal of Paleolimnology* 1(2): 141-148.
- Warren, M. W., et al. (2007). Calpain- and caspase-mediated alphaII-spectrin and tau proteolysis in rat cerebrocortical neuronal cultures after ecstasy or methamphetamine exposure. *Int J Neuropsychopharmacol.* 10: 479-489. [The international journal of neuropsychopharmacology / official scientific journal of the Collegium Internationale Neuropsychopharmacologicum (CINP)].
- Washam, C. (2003). "Concentrating on PBDEs: Chemical levels rise in women." *Environmental Health Perspectives* 111(9): A480-A481.
- Washam, C. (2003). "Suspect inheritance: Potential neurotoxicants passed to fetuses." *Environmental Health Perspectives* 111(9): A480.
- Watanabe, W., et al. (2008). "A new assay system for evaluation of developmental immunotoxicity of chemical compounds using respiratory syncytial virus infection to offspring mice." *Environmental Toxicology and Pharmacology* 25(1): 69-74.
- Watanabe, W., et al. (2013). "Perinatal Exposure to Insecticide Methamidophos Suppressed Production of Proinflammatory Cytokines Responding to Virus Infection in Lung Tissues in Mice." *Biomed Research International*: 7.
- Weber, H. and H. Hesecker (2004). "Analysis of polybrominated diphenyl ethers in breast milk of German mothers - Results of a pilot study." *Ernahrungs Umschau* 51(1): 4-9+2.
- Weber, R., et al. (2011). "Persistent organic pollutants and landfills - A review of past experiences and future challenges." *Waste Management and Research* 29(1): 107-121.

- Webster, L., et al. (2009). "Halogenated persistent organic pollutants in Scottish deep water fish." *Journal of Environmental Monitoring* 11(2): 406-417.
- Webster, P. (2005). "Health in the arctic circle." *Lancet* 365(9461): 741-742.
- Wei, Q., et al. (1996). "Benzo(a)pyrene diol epoxide-induced chromosomal aberrations and risk of lung cancer." *Cancer Research* 56(17): 3975-3979.
- Weiner, M. L. and B. S. Jortner (1999). "Organophosphate-induced delayed neurotoxicity of triarylphosphates." *Neurotoxicology* 20(4): 653-673.
- Weinhold, B. (2009). "Environmental factors in birth defects: What we need to know." *Environmental Health Perspectives* 117(10): A440-A447.
- Weiss, B. (2005). *Psychological Indices of Toxicity*. Encyclopedia of Toxicology (Second Edition). P. Wexler. New York, Elsevier: 558-567.
- Weiss, T., et al. (2015). "Reply to the letter of Anderson J entitled nullComment on Schindler, BK; Weiss, T; Schutze, A; et al. Occupational exposure of air crews to tricresyl phosphate isomers and organophosphate flame retardants after fume events, Arch Toxicol (2013) 87:645null648null." *Archives of Toxicology* 89(2): 263-264.
- Wells, J. B., et al. (2004). "Behavioral response of young rainbow trout (*Oncorhynchus mykiss*) to forest fire-retardant chemicals in the laboratory." *Environ Toxicol Chem* 23(3): 621-625.
- Weng, M. W., et al. (2004). "Benzo[a]pyrene diol epoxide up-regulates COX-2 expression through NF-(kappa)B in rat astrocytes." *Toxicology Letters* 151(2): 345-355.
- Weschler, C. J. (2009). "Changes in indoor pollutants since the 1950s." *Atmospheric Environment* 43(1): 153-169.
- Westerink, R., et al. (2010). "The brominated flame retardants hexabromocyclododecane (HBCD) and BDE-47 affect calcium homeostasis in rat PC12 cells." *Toxicology Letters* 196: S222-S223.
- Westerink, R. H. (2014). "Modulation of cell viability, oxidative stress, calcium homeostasis, and voltage- and ligand-gated ion channels as common mechanisms of action of (mixtures of) non-dioxin-like polychlorinated biphenyls and polybrominated diphenyl ethers." *Environ Sci Pollut Res Int* 21(10): 6373-6383.
- Weston, A., et al. (1986). "Genotoxicity of chemical and physical agents in cultured human tissues and cells." *International Conference on Practical in Vitro Toxicology*, Berkshire, England, September 18-20, 1985. *Food Chem Toxicol* 24(6-7): 675-680.

Whitehead, T. P., et al. (2014). "Persistent organic pollutants in dust from older homes: learning from lead." *Am J Public Health* 104(7): 1320-1326.

Wiegand, H., et al. (2004). "Developmental Neurotoxicity Of Pbdes: Impairment Of Synaptic Plasticity In Rat Cortex And Hippocampus." *Toxicologist* 78(1-S): 392.

Wiener, J. G. and M. B. Sandheinrich (2010). "Contaminants in the Upper Mississippi River: historic trends, responses to regulatory controls, and emerging concerns." *Hydrobiologia* 640(1): 49-70.

Wikoff, D. S. and L. Birnbaum (2011). *Human Health Effects of Brominated Flame Retardants*. Brominated Flame Retardants. E. Eljarrat and D. Barcelo, Springer-Verlag Berlin, Heidelberger Platz 3, D-14197 Berlin, Germany. 16: 19-53.

Wilkinson, S. L., et al. (2009). "Characteristics of Post-Donation Information (PDI) donors: Demographics, intervening donations and differences by PDI reason." *Transfusion* 49: 52A.

Wilks, M. F. and A. M. Tsatsakis (2014). "Environmental contaminants and target organ toxicities - new insights into old problems." *Toxicology Letters* 230(2): 81-84.

Williams, A. L. and J. M. DeSesso (2010). "The potential of selected brominated flame retardants to affect neurological development." *J Toxicol Environ Health B Crit Rev* 13(5): 411-448.

Williams, P. R. D., et al. (2006). "VCCEP pilot: Progress on evaluating children's risks and data needs." *Risk Analysis* 26(3): 781-801.

Wilson, C. G. and P. W. Sherman (2010). "Anciently Asexual Bdelloid Rotifers Escape Lethal Fungal Parasites by Drying Up and Blowing Away." *Science (Washington D C)* 327(5965): 574-576.

Wilson, V. L., et al. (1989). "Alkyl and aryl carcinogen adducts detected in human peripheral lung." *Carcinogenesis (Lond)* 10(11): 2149-2154.

Winckler, K. (2009). "Dietetic follow-up after surgery for obesity." *Aktuelle Ernährungsmedizin* 34(1): 33-37.

Windham, G., et al. (2011). "Communicating individual level biomarker data to participant families in epidemiological studies." *Epidemiology* 22: S35-S36.

Winston, A. and J. H. Vera (2014). "Can antiretroviral therapy prevent HIV-associated cognitive disorders?" *Curr Opin HIV AIDS*. 9(1): 11-16. [Current opinion in HIV and AIDS].

Winter, V., et al. (2013). "Validation of an egg-injection method for embryotoxicity studies in a small, model songbird, the zebra finch (*Taeniopygia guttata*)." *Chemosphere* 90(1): 125-131.

Wojtowicz, A. K., et al. (2014). "PPAR-gamma agonist GW1929 but not antagonist GW9662 reduces TBBPA-induced neurotoxicity in primary neocortical cells." *Neurotox Res* 25(3): 311-322.

Wolkers, H., et al. (2006). "Congener-specific accumulation and patterns of chlorinated and brominated contaminants in adult male walruses from Svalbard, Norway: Indications for individual-specific prey selection." *Science of the Total Environment* 370(1): 70-79.

Wong, D. T. and F. P. Bymaster (1976). "The comparison of fluoxetine and nisoxetine with tricyclic antidepressants in blocking the neurotoxicity of p-chloroamphetamine and 6-hydroxydopamine in the rat brain." *Res Commun Chem Pathol Pharmacol* 15(2): 221-231.

Wong, F., et al. (2013). "Bounding uncertainties in intrinsic human elimination half-lives and intake of polybrominated diphenyl ethers in the North American population." *Environ Int* 59: 168-174.

Woodruff, T. J. (2013). Human Maternal/Fetal Exposures to PBDEs and their Metabolites During Development. RePORTER Database National Institutes of Health.

Woodruff, T. J. and P. Sutton (2010). "Pulling back the curtain: Improving reviews in environmental health." *Environmental Health Perspectives* 118(8): A326-A327.

Woods, R., et al. (2012). "Long-lived epigenetic interactions between perinatal PBDE exposure and Mesp2308 mutation." *Hum Mol Genet* 21(11): 2399-2411.

Wrobel, G., et al. (2009). "Seedless Synthesis and Thermal Decomposition of Single Crystalline Zinc Hydroxystannate Cubes." *Crystal Growth & Design* 9(10): 4456-4460.

Wu, B., et al. (2015). "Acetylcholinesterase Inhibitors from a Marine Fungus *Talaromyces* sp Strain LF458." *Marine Biotechnology (New York)* 17(1): 110-119.

Wu, H., et al. (2015). "Multiple biomarkers of the cytotoxicity induced by BDE-47 in human embryonic kidney cells." *Chemosphere* 126: 32-39.

Wu, J., et al. (2011). "Neuronal store-operated calcium entry pathway as a novel therapeutic target for Huntington's disease treatment." *Chemistry and Biology* 18(6): 777-793.

Wu, S. Y. and J. E. Casida (1996). "Subacute neurotoxicity induced in mice by potent organophosphorus neuropathy target esterase inhibitors." *Toxicol Appl Pharmacol* 139(1): 195-202.

- Wu, X., et al. (1998). "Benzo(a)pyrene diol epoxide and bleomycin sensitivity and susceptibility to cancer of upper aerodigestive tract." *Journal of the National Cancer Institute (Bethesda)* 90(18): 1393-1399.
- Wu, X., et al. (1998). "Benzo(alpha)pyrene diol epoxide-induced 3p21.3 aberrations and genetic predisposition to lung cancer." *Cancer Research* 58(8): 1605-1608.
- Wu, X. A., et al. (2013). "Metabolism of 2,2',3,3',6,6'-hexachlorobiphenyl (PCB 136) atropisomers in tissue slices from phenobarbital or dexamethasone-induced rats is sex-dependent." *Xenobiotica* 43(11): 933-947.
- Wu, Y., et al. (2008). "[Effect of maternal BDE-209 exposure on the learning and memory ability of offspring rats and the dose-effect relation]." *Nan Fang Yi Ke Da Xue Xue Bao* 28(6): 976-978.
- Wu, Y., et al. (2013). "[Neurobehavioral derangement in medaka fish receiving polybrominated diphenyl ethers (PBDE-47) during the early-stage development]." *Wei Sheng Yan Jiu* 42(6): 932-936.
- Wu, Z. C., et al. (2012). "Synthesis of Flaky Flame-retardant Magnesium Hydroxide with High Dispersion." *Acta Chimica Sinica* 70(19): 2045-2048.
- Wybo, J. L., et al. (1995). "Forest fire danger assessment methods and decision support." *Safety Science* 20(1): 61-70.
- Xie, Q., et al. (2015). "Distinct photoproducts of hydroxylated polybromodiphenyl ethers from different photodegradation pathways: a case study of 2'-HO-BDE-68." *Environ Sci Process Impacts* 17(2): 351-357.
- Xie, X. L., et al. (2014). "Adsorption of Lead on the LDO based on Reconstruction of LDH." *Proceedings of 2014 International Conference on Material Science and Engineering* 1035: 7-11.
- Xie, Z., et al. (2014). "Effects of BDE-209 and its mixtures with BDE-47 and BDE-99 on multiple biomarkers in *Carassius auratus*." *Environmental Toxicology and Pharmacology* 38(2): 554-561.
- Xing, T., et al. (2009). "Effects of decabrominated diphenyl ether (PBDE 209) exposure at different developmental periods on synaptic plasticity in the dentate gyrus of adult rats *In vivo*." *Toxicol Sci* 110(2): 401-410.
- Xing, T. R., et al. (2010). "Effects of decabrominated diphenyl ether (PBDE 209) on voltage-gated sodium channels in primary cultured rat hippocampal neurons." *Environ Toxicol* 25(4): 400-408.

- Xiong, Y., et al. (2012). "An in vitro method to study the effects of thyroid hormone-disrupting chemicals on neuronal development." *Neurotoxicology* 33(4): 753-757.
- Xu, L., et al. (2015). "Polybrominated diphenyl ethers in human placenta associated with neonatal physiological development at a typical e-waste recycling area in China." *Environmental Pollution* 196: 414-422.
- Xu, T., et al. (2013). "Effects of acute exposure to polybrominated diphenyl ethers on retinoid signaling in zebrafish larvae." *Environmental Toxicology and Pharmacology* 35(1): 13-20.
- Xu, T., et al. (2015). "High-throughput RNA sequencing reveals the effects of 2,2',4,4' - tetrabromodiphenyl ether on retina and bone development of zebrafish larvae." *Bmc Genomics* 16: 12.
- Xu, X. (2008). Targeting RAR-beta2-led Gene Pathway in Prevention of Esophageal Cancer. RePORTER Database National Institutes of Health.
- Xu, X., et al. (2014). Elevated serum polybrominated diphenyl ethers and alteration of thyroid hormones in children from Guiyu, China. *PLoS One*. 2014; 9(11):e113699. [PloS one].
- Xu, X., et al. (2015). "E-waste environmental contamination and harm to public health in China." *Front Med*.
- Xu, Y., et al. (2010). "Predicting residential exposure to phthalate plasticizer emitted from vinyl flooring: sensitivity, uncertainty, and implications for biomonitoring." *Environ Health Perspect* 118(2): 253-258.
- Xue, C. X., et al. (2004). "An accurate QSPR study of O-H bond dissociation energy in substituted phenols based on support vector machines." *J Chem Inf Comput Sci* 44(2): 669-677.
- Yagli, N. V., et al. (2006). "The relationship between depression and quality of in inpatients with rheumatic disorders including fibromyalgia." *Annals of the Rheumatic Diseases* 65(Suppl. 2): 675.
- Yan, S.-s., et al. (2010). "Research Progress and Future Perspectives in Toxicology Study on Polybrominated Diphenyl Ethers." *Asian Journal of Ecotoxicology* 5(5): 609-617.
- Yan, T., et al. (2012). "Spatial learning and memory deficit of low level polybrominated diphenyl ethers-47 in male adult rat is modulated by intracellular glutamate receptors." *J Toxicol Sci* 37(2): 223-233.



Yanagisawa, R., et al. (2014). "Impaired lipid and glucose homeostasis in hexabromocyclododecane-exposed mice fed a high-fat diet." *Environ Health Perspect* 122(3): 277-283.

Yang, J., et al. (2014). "Magnetic solid phase extraction of brominated flame retardants and pentachlorophenol from environmental waters with carbon doped Fe<sub>3</sub>O<sub>4</sub> nanoparticles." *Applied Surface Science* 321: 126-135.

Yang, R., et al. (2014). "Chain folding in main-chain liquid crystalline polyesters: from pi-pi stacking toward shape memory." *Journal of Materials Chemistry C* 2(30): 6155-6164.

Yang, S., et al. (2014). "Protective effects of puerarin against tetrabromobisphenol a-induced apoptosis and cardiac developmental toxicity in zebrafish embryo-larvae." *Environmental Toxicology*.

Yang, S. L. and K. C. Chang (2002). "Comparison of score metrics for Bayesian network learning." *Ieee Transactions on Systems Man and Cybernetics Part a-Systems and Humans* 32(3): 419-428.

Yang, S. L., et al. (1996). *Comparison of score metrics for Bayesian network learning*. Beijing, Int Academic Publ.

Yang, W.-h., et al. (2009). "Study on Endocrine Disruption and Structure-Activity Relationship of PBDEs and Their Metabolites." *Asian Journal of Ecotoxicology* 4(2): 164-173.

Yao, H., et al. (2010). "The role of TGF-(beta)s expressed by biliary epithelial cells in the pathogenesis of cholestatic liver disease." *Digestion* 81(3): 168-170.

Yao, M. F., et al. (2011). *Study on Dyeing Technology of M-aramid/viscose Fabric in Supercritical Carbon Dioxide*. Textile Bioengineering and Informatics Symposium Proceedings, Vols 1-3. Y. Li, Y. F. Liu, X. N. Luo and J. S. Li. Hong Kong Sar, Textile Bioengineering & Informatics Society Ltd: 757-760.

Ye, X. B., et al. (2007). "Environmental exposure and children's health in China." *Archives of Environmental & Occupational Health* 62(2): 61-73.

Yechezkel, Y., et al. (2013). Catalytic degradation of brominated flame retardants by copper oxide nanoparticles. *Chemosphere*. 93: 172-177. [Chemosphere].

Yegambaram, M., et al. (2015). "Role of environmental contaminants in the etiology of Alzheimer's disease: A review." *Current Alzheimer Research* 12(2): 116-146.

Yodo, N. (1997). "Recent development of advanced functional polymers for semiconductor encapsulants of integrated circuit chips and high-temperature photoresist for electronic applications." *Polymers for Advanced Technologies* 8(4): 215-226.

Younglai, E. V., et al. (2007). "Reproductive toxicology of environmental toxicants: Emerging issues and concerns." *Current Pharmaceutical Design* 13(29): 3005-3019.

Youngstrom, E., et al. (2011). "A proposal to facilitate weight-of-evidence assessments: Harmonization of Neurodevelopmental Environmental Epidemiology Studies (HONEES)." *Neurotoxicology and Teratology* 33(3): 354-359.

Yu, K., et al. (2008). "DE-71-induced apoptosis involving intracellular calcium and the Bax-mitochondria-caspase protease pathway in human neuroblastoma cells in vitro." *Toxicol Sci* 104(2): 341-351.

Yu, L., et al. (2010). "Exposure to DE-71 alters thyroid hormone levels and gene transcription in the hypothalamic-pituitary-thyroid axis of zebrafish larvae." *Aquat Toxicol* 97(3): 226-233.

Yu, L., et al. (2014). "Endocrine disruption and reproduction impairment in zebrafish after long-term exposure to DE-71." *Environmental Toxicology and Chemistry* 33(6): 1354-1362.

Yu, Q., et al. (2012). Study on Synthesis and Application of Methylmethoxyphosphonate Aluminum. *Advances in Chemical Engineering, Pts 1-3*. Y. X. Wen and F. H. Lei. Stafa-Zurich, Trans Tech Publications Ltd. 396-398: 1287-1290.

Yu, X. J., et al. (2011). "Synthesis of ZnSn(OH)(6) regular octahedrons by a simple hydrothermal process." *Crystal Research and Technology* 46(10): 1079-1085.

Yuan, W., et al. (1995). "Mutagenic specificity of syn-benzo(g)chrysene 11,12-dihydrodiol 13,14-epoxide in the dihydrofolate reductase gene of Chinese hamster ovary cells." *Carcinogenesis (Oxford)* 16(11): 2869-2873.

Zampano, G., et al. (2009). "Poly(ethyl acrylate) surface-initiated ATRP grafting from wood pulp cellulose fibers." *Carbohydrate Polymers* 75(1): 22-31.

Zeman, F. J., et al. (1986). "Effects on the fetus of maternal nitrofen exposure in the protein-deprived rat." *Toxicology* 38(1): 55-68.

Zeng, K., et al. (2013). "Effective induction therapy with subcutaneous administration of bortezomib for newly diagnosed POEMS syndrome: A case report and a review of the literature." *Acta Haematologica* 129(2): 101-105.

Zeng, W. H., et al. (2014). "Long-term exposure to decabrominated diphenyl ether impairs CD8 T-cell function in adult mice." *Cellular & Molecular Immunology* 11(4): 367-376.

Zeng, X., et al. (2010). "Application of a congener-specific debromination model to study photodebromination, anaerobic microbial debromination, and FeO reduction of polybrominated diphenyl ethers." *Environ Toxicol Chem* 29(4): 770-778.

Zhai, C., et al. (2014). "Evaluation of BDE-47 hydroxylation metabolic pathways based on a strong electron-withdrawing pentafluorobenzoyl derivatization gas chromatography/electron capture negative ionization quadrupole mass spectrometry." *Environmental Science and Technology* 48(14): 8117-8126.

Zhai, J. X., et al. (2010). "[Effect of exposure to higher decabrominated diphenyl ether (PBDE-209) on learning and memory functions of BALB/c mice]." *Zhonghua Lao Dong Wei Sheng Zhi Ye Bing Za Zhi* 28(1): 25-29.

Zhang, C., et al. (2010). "Protective effect of N-acetylcysteine against BDE-209-induced neurotoxicity in primary cultured neonatal rat hippocampal neurons in vitro." *Int J Dev Neurosci* 28(6): 521-528.

Zhang, C., et al. (2010). "Role of brominated diphenyl ether-209 in the differentiation of neural stem cells in vitro." *Int J Dev Neurosci* 28(6): 497-502.

Zhang, D. P., et al. (2012). "Tissue-specific distribution of fatty acids, polychlorinated biphenyls and polybrominated diphenyl ethers in fish from Taihu Lake, China, and the benefit-risk assessment of their co-ingestion." *Food Chem Toxicol* 50(8): 2837-2844.

Zhang, H., et al. (2014). "In situ preparation, characterization and performance of magnesium carbonate whiskers/cellulose fibers hybrid paper." *Cellulose* 21(6): 4633-4641.

Zhang, H., et al. (2013). "Lactation exposure to BDE-153 damages learning and memory, disrupts spontaneous behavior and induces hippocampus neuron death in adult rats." *Brain Res* 1517: 44-56.

Zhang, H. M., et al. (2013). "[Effects of polybrominated diphenyl ether-153 lactation exposure on the concentrations of intracellular calcium ion and calcium-activated related enzymes levels of adult rats' cerebral cortex]." *Zhonghua Lao Dong Wei Sheng Zhi Ye Bing Za Zhi* 31(7): 515-518.

Zhang, H. Y. and C. J. Zhu (2009). *Applied Research on the Hydraulic Engineering Management System Based on C/S*. New York, Ieee.

Zhang, J. J., et al. (2012). *Hydrothermal Synthesis of Magnesium Hydroxide Sulfate Hydrate Whisker Flame Retardant*. *Advanced Building Materials and Sustainable*

Architecture, Pts 1-4. Y. Shao, S. Hao, Y. Luo, J. Xing and Z. Liu. Stafa-Zurich, Trans Tech Publications Ltd. 174-177: 1034-1037.

Zhang, K., et al. (2010). "TROPHODYNAMICS OF POLYBROMINATED DIPHENYL ETHERS AND METHOXYLATED POLYBROMINATED DIPHENYL ETHERS IN A MARINE FOOD WEB." *Environmental Toxicology and Chemistry* 29(12): 2792-2799.

Zhang, K., et al. (2013). "A review of environmental and human exposure to persistent organic pollutants in the Pearl River Delta, South China." *Science of the Total Environment* 463: 1093-1110.

Zhang, L., et al. (2014). "Short-term effects of Dechlorane Plus on the earthworm *Eisenia fetida* determined by a systems biology approach." *J Hazard Mater* 273: 239-246.

Zhang, M. R., et al. (2006). "[2-11C]isopropyl-, [1-11C]ethyl-, and [11C]methyl-labeled phenoxyphenyl acetamide derivatives as positron emission tomography ligands for the peripheral benzodiazepine receptor: radiosynthesis, uptake, and in vivo binding in brain." *J Med Chem* 49(9): 2735-2742.

Zhang, S., et al. (2009). "Reproductive and developmental toxicity of a pentabrominated diphenyl ether mixture, DE-71, to ranch mink (*Mustela vison*) and hazard assessment for wild mink in the Great Lakes region." *Toxicological Sciences* 110(1): 107-116.

Zhang, S., et al. (2013). "Involvement of the mitochondrial p53 pathway in PBDE-47-induced SH-SY5Y cells apoptosis and its underlying activation mechanism." *Food Chem Toxicol* 62: 699-706.

Zhang, T. L., et al. (2004). "Studies on the reactions of unsaturated chloride polyether polyol with trimethyl phosphite by FTIR." *Guang pu xue yu guang pu fen xi = Guang pu* 24(11): 1334-1337.

Zhang, X., et al. (2013). "Exposure to monocrotophos pesticide causes disruption of the hypothalamic-pituitary-thyroid axis in adult male goldfish (*Carassius auratus*)." *Gen Comp Endocrinol* 193: 158-166.

Zhang, X., et al. (2008). "Induction of hepatic enzymes and oxidative stress in Chinese rare minnow (*Gobiocypris rarus*) exposed to waterborne hexabromocyclododecane (HBCDD)." *Aquatic Toxicology* 86(1): 4-11.

Zhang, X. and F. Zhang (2012). Preparation and performance of a novel intumescent flame retardant. *Advanced Materials, Pts 1-3*. J. L. Bu, Z. Y. Jiang and S. Jiao. Stafa-Zurich, Trans Tech Publications Ltd. 415-417: 424-428.

Zhang, Y., et al. (2009). "EFFECTS OF PBDES ON ANDROGEN PRODUCTION OF ADULT LEYDIG CELLS." *Journal of Andrology*: 67.

- Zhang, Y., et al. (2013). "Improved heuristic equivalent search algorithm based on Maximal Information Coefficient for Bayesian Network Structure Learning." *Neurocomputing* 117: 186-195.
- Zhang, Y. J., et al. (1995). "Immunoperoxidase Detection of Polycyclic Aromatic Hydrocarbon-DNA Adducts in Oral Mucosa Cells of Smokers and Nonsmokers." *Cancer Epidemiology Biomarkers & Prevention* 4(2): 133-138.
- Zhang, Y. X., et al. (2014). "Two-Step Preparation of Magnesium Hydroxide Flame Retardant from Magnesium Oxide." *Chinese Journal of Inorganic Chemistry* 30(4): 860-866.
- Zhang, Y. Y., et al. (2011). "Controllable synthesis and flame retardant properties of bunch-, chrysanthemum-, and plumy-like  $4\text{ZnO}(\text{middle dot})\text{B}_2\text{O}_3(\text{middle dot})\text{H}_2\text{O}$  nanostructures." *Powder Technology* 210(3): 208-211.
- Zhang, Z. F., et al. (2015). "Trolox inhibits 2,2',4,4'-tetrabromodiphenyl ether (BDE-47)-induced hepatocyte apoptosis by restoring proteasome function." *Toxicol Lett* 233(3): 246-257.
- Zhang, Z. X., et al. (2010). "[Oxidative stress of decabromodiphenylether in mice brain tissue]." *Zhonghua Lao Dong Wei Sheng Zhi Ye Bing Za Zhi* 28(12): 900-903.
- Zhao, J., et al. (2014). "Locomotor activity changes on zebrafish larvae with different 2,2',4,4'-tetrabromodiphenyl ether (PBDE-47) embryonic exposure modes." *Chemosphere* 94: 53-61.
- Zhao, Q., et al. (2014). "Surface modification of polyamide 66 fabric by microwave induced grafting with 2-hydroxyethyl methacrylate." *Surface & Coatings Technology* 240: 197-203.
- Zhao, W., et al. (2014). "Assessment of neurotoxic effects and brain region distribution in rat offspring prenatally co-exposed to low doses of BDE-99 and methylmercury." *Chemosphere* 112: 170-176.
- Zhao, X., et al. (2013). "Effects of perchlorate on BDE-47-induced alteration thyroid hormone and gene expression of in the hypothalamus-pituitary-thyroid axis in zebrafish larvae." *Environ Toxicol Pharmacol* 36(3): 1176-1185.
- Zheng, J. and W. Zhou (2014). "Solution-phase synthesis of magnesium hydroxide nanotubes." *Materials Letters* 127: 17-19.
- Zheng, K., et al. (2015). "A two-photon fluorescent probe with a large turn-on signal for imaging hydrogen sulfide in living tissues." *Analytica Chimica Acta* 853(1): 548-554.

Zheng, L. K., et al. (2008). "Blood lead and cadmium levels and relevant factors among children from an e-waste recycling town in China." *Environmental Research* 108(1): 15-20.

Zheng, X., et al. (2012). "Accumulation and biotransformation of BDE-47 by zebrafish larvae and teratogenicity and expression of genes along the hypothalamus-pituitary-thyroid axis." *Environ Sci Technol* 46(23): 12943-12951.

Zhong, S. L., et al. (2011). "CuSn(OH)(6) submicrospheres: Room-temperature synthesis, growth mechanism, and weak antiferromagnetic behavior." *Materials Research Bulletin* 46(12): 2385-2391.

Zhu, B., et al. (2014). "Impact of co-exposure with lead and decabromodiphenyl ether (BDE-209) on thyroid function in zebrafish larvae." *Aquatic Toxicology* 157: 186-195.

Zhuang, Z., et al. (2000). "A novel serotonin transporter ligand: (5-iodo-2-(2-dimethylaminomethylphenoxy)-benzyl alcohol." *Nucl Med Biol* 27(2): 169-175.

Zieminska, E., et al. (2013). "Role of Ca<sup>2+</sup> imbalance mediated by NMDA and ryanodine receptors in acute TBBPA toxicity in primary cultures of rat cerebellar granule cells." *Pharmacological Reports* 65: 105-106.

Zieminska, E., et al. (2012). "Acute Cytotoxicity Evoked by Tetrabromobisphenol A in Primary Cultures of Rat Cerebellar Granule Cells Outweighs the Effects of Polychlorinated Biphenyls." *Polish Journal of Environmental Studies* 21(4): 1079-1087.

Zieminska, E., et al. (2012). "Synergistic neurotoxicity of oxygen-glucose deprivation and tetrabromobisphenol A in vitro: role of oxidative stress." *Pharmacol Rep* 64(5): 1166-1178.

Zilbovicius, C., et al. (2011). "A paradigm shift in predoctoral dental curricula in Brazil: evaluating the process of change." *J Dent Educ* 75(4): 557-564.

Zimmer, B., et al. (2014). "Profiling of drugs and environmental chemicals for functional impairment of neural crest migration in a novel stem cell-based test battery." *Archives of Toxicology* 88(5): 1109-1126.

Zoeller, R. T. (2005). "Environmental chemicals as thyroid hormone analogues: New studies indicate that thyroid hormone receptors are targets of industrial chemicals?" *Molecular and Cellular Endocrinology* 242(1-2): 10-15.

Zoeller, R. T. (2007). "Environmental chemicals impacting the thyroid: Targets and consequences." *Thyroid* 17(9): 811-817.

Zoeller, R. T. (2011). "Endocrine disruption of the thyroid and its consequences in development." *Thyroid* 21(1): 51-71.

Zota, A. R. (2011). Role of endocrine-disrupting chemicals and social stress on perinatal outcomes. RePORTER Database National Institutes of Health.

Zota, A. R. (2012). Role of endocrine-disrupting chemicals and social stress on perinatal outcomes. RePORTER Database National Institutes of Health.

Zota, A. R. (2013). Role of endocrine-disrupting chemicals and social stress on perinatal outcomes. RePORTER Database National Institutes of Health.

Zota, A. R., et al. (2013). "Temporal comparison of PBDEs, OH-PBDEs, PCBs, and OH-PCBs in the serum of second trimester pregnant women recruited from San Francisco General Hospital, California." *Environ Sci Technol* 47(20): 11776-11784.

Zota, A. R., et al. (2011). "Polybrominated diphenyl ethers, hydroxylated polybrominated diphenyl ethers, and measures of thyroid function in second trimester pregnant women in California." *Environ Sci Technol* 45(18): 7896-7905.

Zu, L., et al. (2014). "Concurrent degradation of tetrabromobisphenol A by *Ochrobactrum* sp T under aerobic condition and estrogenic transition during these processes." *Ecotoxicology and Environmental Safety* 104: 220-225.

Zuo, J. and Z. H. Liu (2010). "Controllable Synthesis, Characterization and Flame Retardant Properties of Three Kinds of  $\alpha$ -4CaO center dot 5B(2)O(3)center dot 7H(2)O Nanostructures Constructed by Nanoflakes." *Acta Chimica Sinica* 68(24): 2535-2542.

Zuurbier, M., et al. (2006). "Children's exposure to polybrominated diphenyl ethers." *Acta Paediatr Suppl* 95(453): 65-70.

Zuurbier, M., et al. (2007). "The environmental health of children: priorities in Europe." *Int J Occup Med Environ Health* 20(3): 291-307.

Zuurbier, M., et al. (2007). "Environmental health of European children: Priorities recommended by the PINCHE network." *Environnement, Risques et Sante* 6(1): 43-56.

Zuurmond, W. W., et al. (2007). "New aspects in performing interventional techniques for chronic pain." *Curr Opin Support Palliat Care*. 1(2): 132-136. [Current opinion in supportive and palliative care].

## Instructions for making risk of bias determinations

### Human Studies

***Please answer LOW RISK, PROBABLY LOW RISK, PROBABLY HIGH RISK, HIGH RISK or NOT APPLICABLE and provide details/justification.***

*Note: These criteria for judging risk of bias are for human studies only since we are not evaluating animal studies in this case study. These questions have also been modified from previous applications of the Navigation Guide, with edits intended so that answering “Yes” to each question aligns with a rating of “High risk of bias”, “Probably Yes” → “Probably high risk of bias”, “Probably No” → “Probably low risk of bias” and “No” → “Low risk of bias.”*

### **1. Are the study groups at risk of not representing their source populations in a manner that might introduce selection bias?**

Criteria for a judgment of LOW risk of bias (i.e., answer: “No”):

EITHER:

a) The descriptions of the source population, inclusion/exclusion criteria, recruitment and enrollment procedures, participation and follow-up rates were sufficiently detailed, and adequate data were supplied on the distribution of relevant study sample and population characteristics to support the assertion that risk of selection effects was minimal.

OR

b) Although the descriptions and/or data as indicated in “a” above suggested the potential for selection effects, adequate support was given indicating that potential selection effects were *not* differential across both exposure and outcome.

OR

c) Although the descriptions and/or data as indicated in “a” above suggested the potential for selection effects and there was no support indicating that potential selection effects were *not* differential across both exposure and outcome, selection factors appeared to be well-understood, were measured in the data set, and appropriate adjustment post hoc techniques were used to control for selection bias.

Criteria for the judgment of PROBABLY LOW risk of bias (i.e., answer: “Probably No”):

There is insufficient information about participant selection to permit a judgment of low risk of bias, but there is indirect evidence which suggests that



inclusion/exclusion criteria, recruitment and enrollment procedures, and participation and follow-up rates were consistent across groups as described by the criteria for a judgment of low risk of bias.

Criteria for the judgment of PROBABLY HIGH risk of bias (i.e., answer: “Probably Yes”):

There is insufficient information about participant selection to permit a judgment of high risk of bias, but there is indirect evidence which suggests that inclusion/exclusion criteria, recruitment and enrollment procedures, and participation and follow-up rates were inconsistent across groups, as described by the criteria for a judgment of high risk of bias.

Criteria for the judgment of HIGH risk of bias (i.e., answer: “Yes”):

- a) There were indications from descriptions of the source population, inclusion/exclusion criteria, recruitment and enrollment procedures, participation and follow-up rates, or data on the distribution of relevant study sample and population characteristics that risk of selection effects were substantial; and
- b) There was no support to indicate that potential selection effects were *not* differential across both exposure and outcome; and
- c) Adjustment post hoc techniques were not used to control for selection bias.

Criteria for the judgment of NOT APPLICABLE (risk of bias domain is not applicable to study):

There is evidence that participant selection is not an element of study design capable of introducing risk of bias in the study.

**2. Was knowledge of the group assignments inadequately prevented (i.e., blinded or masked) during the study, potentially leading to subjective measurement of either exposure or outcome?**

Criteria for a judgment of LOW risk of bias (i.e., answer: “No”):

Any of the following:

- No blinding, but the review authors judge that the outcome measures as well as the exposure measures are not likely to be influenced by lack of blinding (such as differential outcome assessment where the outcome is assessed using different measurement or estimation metrics across exposure groups, or differential exposure assessment where exposure is

assessed using different measurement or estimation metrics across diagnostic or outcome groups); or

- Blinding of key study personnel was ensured, and it is unlikely that the blinding could have been broken; or
- Some key study personnel were not blinded, but exposure and outcome assessment was blinded and the non-blinding of others is unlikely to introduce bias.

Criteria for the judgment of PROBABLY LOW risk of bias (i.e., answer: “Probably No”):

There is insufficient information about blinding to permit a judgment of low risk of bias, but there is indirect evidence which suggests the study was adequately blinded, as described by the criteria for a judgment of low risk of bias. For example, investigators were effectively blinded to the exposure and/or outcome groups if the exposure was measured by a separate entity and the outcome was obtained from a hospital record.

Criteria for the judgment of PROBABLY HIGH risk of bias (i.e., answer: “Probably Yes”):

There is insufficient information about blinding to permit a judgment of high risk of bias, but there is indirect evidence which suggests the study was not adequately blinded, as described by the criteria for a judgment of high risk of bias.

Criteria for the judgment of HIGH risk of bias (i.e., answer: “Yes”):

Any of the following:

- No blinding or incomplete blinding, and the outcome measures or exposure measures is likely to be influenced by lack of blinding (i.e., differential outcome or exposure assessment); or
- Blinding of key study personnel attempted, but likely that the blinding could have been broken so as to introduce bias; or
- Some key study personnel were not blinded, and the non-blinding of others was likely to introduce bias.

Criteria for the judgment of NOT APPLICABLE (risk of bias domain is not applicable to study):

There is evidence that blinding is not an element of study design capable of introducing risk of bias in the study.

### **3. Were exposure assessment methods lacking accuracy?**

Criteria for a judgment of LOW risk of bias (i.e., answer: “No”):

The reviewers judge that there is low risk of exposure misclassification, i.e.,:

- There is high confidence in the accuracy of the exposure assessment methods, such as methods that have been tested for validity and reliability in measuring the targeted exposure; or
- Less-established or less direct exposure measurements are validated against well-established or direct methods

AND if applicable, appropriate QA/QC for methods are described and are satisfactory, with at least three of the following items reported, or at least two of the following items reported plus evidence of satisfactory performance in a high quality inter-laboratory comparison:

- Limit of detection or quantification;
- standards recovery;
- measure of repeatability;
- investigation and prevention of blanks contamination.

Criteria for the judgment of PROBABLY LOW risk of bias (i.e., answer: “Probably No”):

There is insufficient information about the exposure assessment methods to permit a judgment of low risk of bias, but there is indirect evidence which suggests that methods were robust, as described by the criteria for a judgment of low risk of bias. Studies only reporting that the QA/QC items above, if relevant, were satisfactory but not reporting all of the actual numbers may receive a judgment of “probably low risk of bias.”

Criteria for the judgment of PROBABLY HIGH risk of bias (i.e., answer: “Probably Yes”):

There is insufficient information about the exposure assessment methods to permit a judgment of high risk of bias, but there is indirect evidence which suggests that methods were not robust, as described by the criteria for a judgment of high risk of bias.

Criteria for the judgment of HIGH risk of bias (i.e., answer: “Yes”):

The reviewers judge that there is high risk of exposure misclassification and any one of the following:

- There is low confidence in the accuracy of the exposure assessment methods; or
- Less-established or less direct exposure measurements were not validated and are suspected to introduce bias that impacts the outcome assessment (example: participants are asked to report exposure status retrospectively, subject to recall bias)
- Uncertain how exposure information was obtained

Criteria for the judgment of NOT APPLICABLE (risk of bias domain is not applicable to study):

There is evidence that exposure assessment methods are not capable of introducing risk of bias in the study.

#### **4. Were outcome assessment methods lacking accuracy?**

Criteria for a judgment of LOW risk of bias (i.e., answer: “No”):

The reviewers judge that there is low risk of outcome misclassification, i.e.:

- Outcomes were assessed and defined consistently across all study participants, using valid and reliable measures; or
- Less-established or less direct outcome measurements are validated against well-established or direct methods; or
- Appropriate sensitivity analyses were conducted that suggest the influence of outcome misclassification would be minimal
- AND, if applicable, appropriate QA/QC for methods is described and is satisfactory.

Criteria for the judgment of PROBABLY LOW risk of bias (i.e., answer: “Probably No”):

There is insufficient information about the outcome assessment methods to permit a judgment of low risk of bias, but there is indirect evidence which suggests that methods were robust, as described by the criteria for a judgment of low risk of bias. Appropriate QA/QC for methods are not described but the review authors judge that the outcome and the outcome assessment are objective and uniform across study groups.

Criteria for the judgment of PROBABLY HIGH risk of bias (i.e., answer: “Probably Yes”):

There is insufficient information about the outcome assessment methods to permit a judgment of high risk of bias, but there is indirect evidence which suggests that methods were not robust, as described by the criteria for a judgment of high risk of bias.

Criteria for the judgment of HIGH risk of bias (i.e., answer: “Yes”):

The reviewers judge that there is high risk of outcome misclassification and any one of the following:

- There is low confidence in the accuracy of the outcome assessment methods; or

- Less-established or less direct outcome measurements are not validated and are suspected to introduce bias that impacts the outcome assessment
- Uncertain how outcome information was obtained

Criteria for the judgment of NOT APPLICABLE (risk of bias domain is not applicable to study):

There is evidence that outcome assessment methods are not capable of introducing risk of bias in the study.

### **5. Was potential confounding inadequately incorporated?**

List of important potential confounders, collectively generated by review authors (DA, BPL, JM) prior to the initiation of screening for studies based on expert opinion and knowledge gathered from the literature (Eskenazi et al. 2013; Watkins et al. 2013):

Tier I: Important confounders

- Home Inventory
- Maternal age
- Maternal education
- Marital status
- Maternal use of alcohol during pregnancy
- Maternal depression
- Household income/poverty (measure of socioeconomic status (SES))
- Gestational exposure to environmental tobacco smoke (active)
- Child sex
- Exposure to other neurotoxic agents (i.e., lead)

Tire II: Other potentially important confounders:

- Birth weight or gestational age
- Number of children in the home
- Father's presence in the home
- Preschool and out-of-home child care attendance
- Psychometrician, location and language of assessment

Criteria for a judgment of LOW risk of bias (i.e., answer: “No”):

The study appropriately assessed and accounted for (i.e., matched, stratified, or statistically controlled for) all important confounders (Tier I), or reported that important confounders were evaluated and omitted because inclusion did not

substantially affect the results. The determination of specific confounders may also be informed by, but not limited to, the studies included in the overall review,

AND the study appropriately assessed and accounted for (i.e., matched, stratified, or statistically controlled for) other potentially important confounders relevant (Tier II), or reported that these confounders were evaluated and omitted because inclusion did not substantially affect the results,

AND the important potential confounders were measured consistently across study groups using valid and reliable methods, or the influence of covariate measurement error was determined, through sensitivity analysis, to be minimal.

Criteria for the judgment of PROBABLY LOW risk of bias (i.e., answer: “Probably No”):

The study appropriately accounted for most but not all of the important confounders (Tier I),

AND this is not expected to introduce substantial bias.

Criteria for the judgment of PROBABLY HIGH risk of bias (i.e., answer: “Probably Yes”):

The study evaluated some but not all of the important confounders (Tier I),

AND some but not all of the other potentially important confounders relevant (Tier II),

AND this is expected to introduce substantial bias.

Criteria for the judgment of HIGH risk of bias (i.e., answer: “Yes”):

The study did not account for or evaluate multiple important confounders (Tier I),

AND did not account for or evaluate multiple other potentially important confounders relevant (Tier II),

OR the important potential confounders were inappropriately measured and/or inappropriately analyzed across study groups.

Criteria for the judgment of NOT APPLICABLE (risk of bias domain is not applicable to study):

There is evidence that outcome assessment methods are not capable of introducing risk of bias in the study.

## **6. Were incomplete outcome data inadequately addressed?**

Criteria for a judgment of LOW risk of bias (i.e., answer: “No”):

Participants were followed long enough to obtain outcome measurements  
OR any one of the following:

- No missing outcome data; or
- Reasons for missing outcome data unlikely to be related to true outcome (for survival data, censoring unlikely to introduce bias); or
- Attrition or missing outcome data balanced in numbers across exposure groups, with similar reasons for missing data across groups; or
- For dichotomous outcome data, the proportion of missing outcomes compared with observed event risk not enough to have a relevant impact on the exposure effect estimate; or
- For continuous outcome data, plausible effect size (difference in means or standardized difference in means) among missing outcomes not enough to have a relevant impact on the observed effect size; or
- Missing data have been imputed using appropriate methods

Criteria for the judgment of PROBABLY LOW risk of bias (i.e., answer: “Probably No”):

There is insufficient information about incomplete outcome data to permit a judgment of low risk of bias, but there is indirect evidence which suggests incomplete outcome data was adequately addressed, as described by the criteria for a judgment of low risk of bias.

Criteria for the judgment of PROBABLY HIGH risk of bias (i.e., answer: “Probably Yes”):

There is insufficient information about incomplete outcome data to permit a judgment of high risk of bias, but there is indirect evidence which suggests incomplete outcome data was not adequately addressed, as described by the criteria for a judgment of high risk of bias.

Criteria for the judgment of HIGH risk of bias (i.e., answer: “Yes”):

Participants were not followed long enough to obtain outcome measurements  
OR any one of the following:

- Reason for missing outcome data likely to be related to true outcome, with either imbalance in numbers or reasons for missing data across exposure groups; or
- For dichotomous outcome data, the proportion of missing outcomes compared with observed event risk enough to induce biologically relevant bias in intervention effect estimate; or

- For continuous outcome data, plausible effect size (difference in means or standardized difference in means) among missing outcomes enough to induce biologically relevant bias in observed effect size; or
- Potentially inappropriate application of imputation.

Criteria for the judgment of NOT APPLICABLE (risk of bias domain is not applicable to study):

There is evidence that incomplete outcome data is not capable of introducing risk of bias in the study.

## **7. Does the study report appear to have selective outcome reporting?**

Criteria for a judgment of LOW risk of bias (i.e., answer: “No”):

All of the study’s pre-specified (primary and secondary) outcomes outlined in the protocol, methods, abstract, and/or introduction that are of interest in the review have been reported in the pre-specified way.

Criteria for the judgment of PROBABLY LOW risk of bias (i.e., answer: “Probably No”):

There is insufficient information about selective outcome reporting to permit a judgment of low risk of bias, but there is indirect evidence which suggests the study was free of selective reporting, as described by the criteria for a judgment of low risk of bias.

Criteria for the judgment of PROBABLY HIGH risk of bias (i.e., answer: “Probably Yes”):

There is insufficient information about selective outcome reporting to permit a judgment of high risk of bias, but there is indirect evidence which suggests the study was not free of selective reporting, as described by the criteria for a judgment of high risk of bias.

Criteria for the judgment of HIGH risk of bias (i.e., answer: “Yes”):

Any one of the following:

- Not all of the study’s pre-specified primary outcomes (as outlined in the protocol, methods, abstract, and/or introduction) have been reported; or
- One or more primary outcomes is reported using measurements, analysis methods or subsets of the data (e.g. subscales) that were not pre-specified; or



- One or more reported primary outcomes were not pre-specified (unless clear justification for their reporting is provided, such as an unexpected effect); or
- One or more outcomes of interest are reported incompletely

Criteria for the judgment of NOT APPLICABLE (risk of bias domain is not applicable to study):

There is evidence that selective outcome reporting is not capable of introducing risk of bias in the study.

**8. Did the study receive any support from a company, study author, or other entity having a financial interest in any of the exposures studied?**

Criteria for a judgment of LOW risk of bias (i.e., answer: “No”):

The study did not receive support from a company, study author, or other entity having a financial interest in the outcome of the study. Examples include the following:

- Funding source is limited to government, non-profit organizations, or academic grants funded by government, foundations and/or non-profit organizations;
- Chemicals or other treatment used in study were purchased from a supplier;
- Company affiliated staff are not mentioned in the acknowledgements section;
- Authors were not employees of a company with a financial interest in the outcome of the study;
- Company with a financial interest in the outcome of the study was not involved in the design, conduct, analysis, or reporting of the study and authors had complete access to the data;
- Study authors make a claim denying conflicts of interest;
- Study authors are unaffiliated with companies with financial interest, and there is no reason to believe a conflict of interest exists;
- All study authors are affiliated with a government agency (are prohibited from involvement in projects for which there is a conflict of interest or an appearance of conflict of interest).

Criteria for the judgment of PROBABLY LOW risk of bias (i.e., answer: “Probably No”):

There is insufficient information to permit a judgment of low risk of bias, but there is indirect evidence which suggests the study was free of support from a company, study author, or other entity having a financial interest in the outcome of the study, as described by the criteria for a judgment of low risk of bias.

Criteria for the judgment of PROBABLY HIGH risk of bias (i.e., answer: “Probably Yes”):

There is insufficient information to permit a judgment of high risk of bias, but there is indirect evidence which suggests the study was not free of support from a company, study author, or other entity having a financial interest in the outcome of the study, as described by the criteria for a judgment of high risk of bias.

Criteria for the judgment of HIGH risk of bias (i.e., answer: “Yes”):

The study received support from a company, study author, or other entity having a financial interest in the outcome of the study. Examples of support include:

- Research funds;
- Chemicals, equipment or testing provided at no cost;
- Writing services;
- Author/staff from study was employee or otherwise affiliated with company with financial interest;
- Company limited author access to the data;
- Company was involved in the design, conduct, analysis, or reporting of the study;
- Study authors claim a conflict of interest

Criteria for the judgment of NOT APPLICABLE (risk of bias domain is not applicable to study):

There is evidence that conflicts of interest are not capable of introducing risk of bias in the study.

## **9. Did the study appear to have other problems that could put it at a risk of bias?**

Criteria for a judgment of LOW risk of bias (i.e., answer: “No”):

The study appears to be free of other sources of bias.

Criteria for the judgment of PROBABLY LOW risk of bias (i.e., answer: “Probably No”):

There is insufficient information to permit a judgment of low risk of bias, but there is indirect evidence which suggests the study was free of other threats to validity.

Criteria for the judgment of PROBABLY HIGH risk of bias (i.e., answer: “Probably Yes”):

There is insufficient information to permit a judgment of high risk of bias, but there is indirect evidence which suggests the study was not free of other threats to validity, as described by the criteria for a judgment of high risk of bias.

Criteria for the judgment of HIGH risk of bias (i.e., answer: “Yes”):

There is at least one important risk of bias. For example, the study:

- Had a potential source of bias related to the specific study design used; or
- Stopped early due to some data-dependent process (including a formal-stopping rule); or
- The conduct of the study is affected by interim results (e.g. recruiting additional participants from a subgroup showing greater or lesser effect); or
- Has been claimed to have been fraudulent; or
- Had some other problem

## References

- Adgent MA, Hoffman K, Goldman BD, Sjödin A, Daniels JL. 2014. Brominated flame retardants in breast milk and behavioural and cognitive development at 36 months. *Paediatric and Perinatal Epidemiology* 28:48-57.
- Chao HR, Tsou TC, Huang HL, Chang-Chien GP. 2011. Levels of breast milk PBDEs from southern Taiwan and their potential impact on neurodevelopment. *Pediatric Research* 70:596-600.
- Chen A, Yolton K, Rauch SA, Webster GM, Hornung R, Sjödin A, et al. 2014. Prenatal polybrominated diphenyl ether exposures and neurodevelopment in U.S. Children through 5 years of age: The HOME study. *Environ Health Perspect* 122:856-862.
- Cowell WJ, Lederman SA, Sjödin A, Jones R, Wang S, Perera FP, et al. 2015. Prenatal exposure to polybrominated diphenyl ethers and child attention problems at 3-7 years. *Neurotoxicology and Teratology* 52:143-150.
- Eskenazi B, Chevrier J, Rauch SA, Kogut K, Harley KG, Johnson C, et al. 2013. In utero and childhood polybrominated diphenyl ether (PBDE) exposures and neurodevelopment in the CHAMACOS study. *Environ Health Perspect* 121:257-262.
- Gascon M, Vrijheid M, Martinez D, Forns J, Grimalt JO, Torrent M, et al. 2011. Effects of pre and postnatal exposure to low levels of polybromodiphenyl ethers on neurodevelopment and thyroid hormone levels at 4 years of age. *Environment International* 37:605-611.
- Gascon M, Fort M, Martinez D, Carsin AE, Forns J, Grimalt JO, et al. 2012. Polybrominated diphenyl ethers (PBDEs) in breast milk and neuropsychological development in infants. *Environ Health Perspect* 120:1760-1765.
- Gump BB, Yun S, Kannan K. 2014. Polybrominated diphenyl ether (PBDE) exposure in children: Possible associations with cardiovascular and psychological functions. *Environmental Research* 132:244-250.
- Herbstman JB, Sjödin A, Kurzton M, Lederman SA, Jones RS, Rauh V, et al. 2010. Prenatal exposure to PBDEs and neurodevelopment. *Environ Health Perspect* 118:712-719.
- Hoffman K, Adgent M, Goldman BD, Sjödin A, Daniels JL. 2012. Lactational exposure to polybrominated diphenyl ethers and its relation to social and emotional development among toddlers. *Environ Health Perspect* 120:1438-1442.

Levesque S, Taetzsch T, Lull ME, Kodavanti U, Stadler K, Wagner A, et al. 2011. Diesel exhaust activates and primes microglia: Air pollution, neuroinflammation, and regulation of dopaminergic neurotoxicity. *Environ Health Perspect* 119:1149.

Lin DY, Chao HR, Gou YY, Huang CY. Infants ingesting high breast milk levels of polybrominated diphenyl ethers may have negative impact on their neurodevelopment. In: *Proceedings of the 2010 International Conference, 2010, ((ICCCE) CaCE ed)*, 325-327.

Roze E, Meijer L, Bakker A, Van Braeckel KN, Sauer PJ, Bos AF. 2009. Prenatal exposure to organohalogenes, including brominated flame retardants, influences motor, cognitive, and behavioral performance at school age. *Environ Health Perspect* 117:1953-1958.

Sagiv SK, Kogut K, Gaspar FW, Gunier RB, Harley KG, Parra K, et al. 2015. Prenatal and childhood polybrominated diphenyl ether (PBDE) exposure and attention and executive function at 9-12 years of age. *Neurotoxicology and Teratology* 52:151-161.

Shy CG, Huang HL, Chang-Chien GP, Chao HR, Tsou TC. 2011. Neurodevelopment of infants with prenatal exposure to polybrominated diphenyl ethers. *Bulletin of Environmental Contamination and Toxicology* 87:643-648.

Watkins DJ, McClean MD, Fraser AJ, Weinberg J, Stapleton HM, Webster TF. 2013. Associations between PBDEs in office air, dust, and surface wipes. *Environment International* 59:124-132.

Zhang H, Yolton K, Webster GM, Sjodin A, Calafat AM, Dietrich KN, et al. 2016. Prenatal PBDE and PCB exposures and reading, cognition, and externalizing behavior in children. *Environ Health Perspect*.
